# Supplementary material for: A connectome and analysis of the adult Drosophila central brain
Source: eLife. 2020 Sep 7;9:e57443. doi: 10.7554/eLife.57443 (PMC7546738; doi:10.7554/eLife.57443)
Supplement: Appendix 1—figure 1—source data 1. — Column A: initial recall; column B: initial precision; column C: cascade recall; column D: cascade precision. [file elife-57443-app1-fig1-data1.csv]

initial_recall	initial_precision	cascade_recall	cascade_precision
0.813	0.919	0.851	0.914
0.813	0.919	0.850	0.914
0.813	0.919	0.850	0.914
0.813	0.919	0.849	0.916
0.813	0.919	0.849	0.916
0.813	0.919	0.848	0.916
0.813	0.919	0.846	0.918
0.813	0.919	0.845	0.920
0.813	0.919	0.844	0.922
0.813	0.919	0.841	0.926
0.813	0.919	0.840	0.927
0.810	0.919	0.835	0.929
0.807	0.920	0.829	0.931
0.805	0.921	0.823	0.933
0.801	0.921	0.818	0.934
0.797	0.921	0.811	0.936
0.782	0.924	0.793	0.938
0.768	0.928	0.773	0.941
0.745	0.931	0.746	0.943
0.718	0.937	0.717	0.946
0.684	0.941	0.681	0.950
0.637	0.948	0.632	0.956
0.568	0.954	0.563	0.958
0.466	0.961	0.463	0.964
0.281	0.970	0.280	0.972
