# Supplementary material for: A connectome and analysis of the adult Drosophila central brain
Source: eLife. 2020 Sep 7;9:e57443. doi: 10.7554/eLife.57443 (PMC7546738; doi:10.7554/eLife.57443)
Supplement: Appendix 1—figure 2—source data 1. — Column A: initial recall; column B: initial precision; column C: cascade recall; column D: cascade precision; column E: hybrid recall; column F: hybrid precision; column G: synfulp recall; column H: synfulp precision. [file elife-57443-app1-fig2-data1.csv]

initial_recall	initial_precision	cascade_recall	cascade_precision	hybrid_recall	hybrid_precision	synfulp_recall	synfulp_precision
0.698	0.765	0.741	0.753	0.746	0.795	0.771	0.465
0.698	0.765	0.740	0.754	0.746	0.796	0.771	0.465
0.682	0.784	0.723	0.772	0.732	0.803	0.761	0.498
0.654	0.805	0.693	0.794	0.709	0.810	0.749	0.535
0.618	0.822	0.654	0.812	0.633	0.831	0.737	0.578
0.548	0.843	0.583	0.832	0.572	0.838	0.709	0.630
0.460	0.863	0.491	0.851	0.491	0.851	0.645	0.704
0.347	0.873	0.373	0.862	0.373	0.862	0.490	0.795
0.171	0.887	0.185	0.882	0.185	0.882	0.141	0.876
