# Supplementary material for: A connectome and analysis of the adult Drosophila central brain
Source: eLife. 2020 Sep 7;9:e57443. doi: 10.7554/eLife.57443 (PMC7546738; doi:10.7554/eLife.57443)
Supplement: Appendix 1—figure 3—source data 1. — Column A: cascade synapse count; column B: synfulp synapse count; column C: frequency of this pair in our data. [file elife-57443-app1-fig3-data1.csv]

cascade_syn_count	synfulp_syn_count	neuron_pair_freq
0	1	888834
1	1	844553
1	0	574180
2	2	209820
1	2	205186
2	1	178348
0	2	131842
2	0	89627
2	3	82744
3	3	82588
3	2	72279
1	3	53151
3	1	47193
3	4	42952
4	4	42082
4	3	36769
0	3	29704
2	4	28943
4	5	25831
4	2	25124
5	5	24745
5	4	21608
3	0	21570
3	5	18357
5	6	16687
1	4	16154
4	1	16058
6	6	15885
5	3	14920
6	5	14221
4	6	13128
6	7	12045
7	7	10939
2	5	10647
5	2	10432
7	6	9828
6	4	9679
0	4	9614
5	7	9308
7	8	8581
8	8	7806
3	6	7745
8	7	7072
6	8	7035
7	5	7023
6	3	6862
4	0	6779
8	9	6412
5	1	6327
4	7	6077
9	9	5912
1	5	5516
7	9	5458
9	8	5449
8	6	5160
9	10	5031
7	4	4855
6	2	4830
5	8	4812
8	10	4513
10	10	4438
0	5	4321
10	9	4105
9	7	4081
2	6	4051
6	9	4008
10	11	3888
8	5	3668
7	3	3637
11	11	3619
9	11	3591
3	7	3296
11	10	3287
7	10	3274
10	8	3246
11	12	3189
10	12	3046
12	12	2991
6	1	2887
4	8	2867
9	6	2862
8	4	2761
8	11	2755
12	11	2658
12	13	2635
11	9	2564
11	13	2490
7	2	2480
5	0	2424
13	13	2399
5	9	2382
9	12	2339
10	7	2318
1	6	2231
13	12	2221
0	6	2213
6	10	2129
9	5	2118
8	3	2077
12	10	2061
10	13	2057
12	14	2039
13	14	2027
7	11	1872
14	14	1864
2	7	1811
13	11	1802
14	13	1801
11	8	1799
14	15	1798
13	15	1678
9	4	1677
11	14	1675
10	6	1664
15	15	1611
8	12	1604
12	9	1592
15	16	1568
12	15	1539
3	8	1531
14	12	1513
14	16	1499
9	13	1488
15	14	1460
8	2	1440
7	1	1400
11	7	1373
0	7	1373
16	16	1368
10	14	1355
10	5	1331
13	10	1291
4	9	1282
16	17	1280
13	16	1248
16	15	1238
15	13	1228
5	10	1228
15	17	1209
12	8	1192
9	3	1178
14	11	1173
11	15	1163
17	17	1149
6	11	1136
14	17	1128
17	18	1115
7	12	1114
17	16	1106
1	7	1096
16	18	1094
11	6	1090
16	14	1075
10	4	1075
12	16	1054
13	9	1051
6	0	1005
8	13	965
13	17	963
17	19	960
18	18	954
15	12	953
11	5	935
15	18	929
18	19	903
17	15	899
12	7	891
19	19	879
14	10	879
18	17	866
9	14	854
14	18	848
16	13	834
16	19	833
0	8	830
10	15	829
9	2	811
13	8	807
19	18	796
10	3	791
2	8	777
12	6	775
18	16	773
19	20	772
18	20	761
11	16	754
17	20	751
19	21	746
15	19	744
8	1	735
12	17	723
15	11	721
3	9	713
20	20	708
11	4	706
17	14	701
20	21	695
19	17	693
20	19	681
4	10	681
14	9	657
5	11	652
16	20	651
16	12	640
21	21	640
18	15	639
21	20	634
0	9	634
13	7	634
12	5	621
13	18	615
18	21	615
8	14	602
20	18	601
20	22	595
21	23	591
1	8	588
19	22	587
14	19	584
22	22	582
21	22	580
14	8	579
15	10	579
9	15	579
17	21	578
6	12	577
7	13	563
17	13	560
13	6	558
15	20	546
18	22	544
21	19	543
19	16	539
22	23	530
22	21	517
20	23	515
10	16	511
11	3	508
15	9	492
14	7	489
10	2	489
16	11	486
18	14	480
22	24	479
21	24	477
0	10	476
12	4	475
22	20	473
19	23	466
23	23	464
16	21	463
11	17	457
13	19	456
21	18	453
20	17	451
23	22	442
2	9	442
13	5	442
17	12	437
12	18	434
22	25	431
24	23	429
15	8	428
24	25	420
24	24	419
21	25	415
19	15	412
0	11	411
20	24	411
9	1	407
23	25	407
23	24	405
24	26	400
14	6	398
17	22	392
23	21	391
14	20	389
18	13	388
7	0	386
20	16	386
16	10	381
15	21	377
19	24	377
12	3	377
3	10	373
24	22	372
18	23	371
17	11	370
23	26	366
25	24	363
25	26	361
15	7	356
22	19	355
5	12	355
25	25	354
14	5	352
4	11	349
8	15	348
16	9	346
27	27	341
24	27	341
25	23	338
23	20	336
16	22	336
16	8	330
26	27	327
26	26	327
0	12	326
25	27	326
13	4	323
21	17	321
1	9	320
17	10	318
9	16	317
20	25	316
6	13	315
27	28	315
26	25	314
17	23	313
22	18	312
23	27	310
22	26	310
16	7	309
18	12	307
25	28	305
24	21	304
7	14	302
23	19	300
26	28	300
12	19	293
11	18	293
21	26	293
18	24	293
24	28	291
10	17	288
13	20	287
15	6	286
19	14	286
19	13	285
27	26	283
19	25	277
20	15	273
15	22	268
27	29	268
27	25	267
14	21	267
17	9	266
25	22	266
11	2	264
26	29	264
0	13	261
23	28	261
28	28	261
20	26	260
20	14	259
15	5	257
26	24	257
18	11	256
29	30	255
27	24	253
22	27	252
25	29	250
21	16	250
17	8	246
22	17	243
26	30	243
2	10	242
18	10	242
28	27	242
19	12	242
1	10	238
28	30	238
27	30	238
21	15	234
22	28	234
30	30	232
16	23	232
0	14	232
8	0	231
26	23	230
17	7	230
23	18	227
16	6	226
28	26	226
24	29	225
30	29	225
18	9	223
24	20	223
29	28	222
3	11	220
25	21	219
17	24	217
20	13	217
18	8	217
19	26	215
26	22	214
10	1	214
29	29	214
31	30	213
29	27	212
18	25	212
30	31	210
24	30	210
24	19	210
31	32	208
12	20	208
27	31	207
19	11	207
30	32	207
0	15	206
21	27	206
1	11	206
29	31	205
28	25	205
13	3	205
28	31	204
14	22	203
7	15	203
30	28	203
4	12	203
28	29	202
16	24	202
20	27	202
25	30	200
11	19	199
28	32	199
19	10	199
6	14	198
21	28	195
14	4	195
5	13	194
29	26	194
29	32	194
8	16	191
23	29	191
26	31	191
20	12	190
31	29	189
30	33	187
13	21	186
19	9	185
12	2	183
32	32	182
28	24	182
30	27	182
28	33	182
31	31	181
9	17	181
31	34	180
0	16	179
31	33	178
10	18	177
17	6	177
27	23	177
22	16	175
26	21	174
32	33	174
29	33	173
25	20	168
27	22	168
21	14	168
33	31	167
2	11	166
20	11	165
18	26	164
29	25	164
23	17	164
22	15	164
15	4	163
33	33	163
27	32	162
24	18	161
18	7	161
32	29	160
32	34	160
27	21	160
16	5	159
32	31	158
20	10	157
33	32	157
20	28	157
22	29	156
23	16	155
34	33	154
32	30	154
25	31	153
30	35	153
32	35	152
23	15	152
33	35	151
29	34	150
19	8	150
34	34	150
0	17	150
21	13	149
30	26	147
15	23	146
3	12	146
27	33	146
34	35	145
5	14	144
26	20	144
30	34	143
21	12	143
31	35	142
33	34	142
29	24	141
32	36	141
21	10	139
24	17	139
1	12	139
17	25	139
26	32	138
0	18	138
14	3	137
24	31	136
31	28	136
28	34	135
35	36	134
33	36	134
6	15	133
28	23	133
14	23	133
25	18	133
21	29	132
31	36	132
8	17	131
37	38	131
25	19	131
35	35	131
23	30	131
20	9	131
4	13	131
35	32	130
32	28	130
33	29	129
22	14	129
7	16	129
24	16	128
34	37	128
34	36	127
22	12	127
36	36	127
25	32	126
34	32	126
9	18	125
29	23	125
35	34	124
30	25	124
19	27	124
31	27	123
23	31	123
15	24	122
25	33	122
34	31	122
21	11	121
30	36	121
33	30	121
35	37	121
28	22	121
11	20	120
1	14	118
23	14	118
17	26	118
10	19	118
22	13	117
13	22	117
30	24	117
12	21	117
18	27	117
19	7	116
22	30	116
13	2	115
16	4	115
25	17	115
24	14	114
2	12	114
36	34	114
33	37	114
37	39	114
27	20	113
36	38	113
31	26	113
37	35	113
29	35	111
1	13	111
36	35	111
20	29	111
25	16	110
11	1	110
37	37	110
20	8	109
35	33	108
23	13	107
38	39	107
32	37	107
18	6	107
16	25	106
27	34	106
38	40	105
38	38	105
35	38	104
22	11	104
39	38	104
37	36	104
15	25	103
26	19	103
24	32	103
17	5	103
26	17	102
33	38	102
41	40	102
2	13	102
32	27	102
40	41	101
26	34	101
37	40	101
11	21	100
13	23	100
38	37	100
30	37	100
19	28	100
31	25	99
22	10	99
29	22	99
36	33	99
14	24	99
38	36	99
23	12	99
36	32	98
36	37	98
32	26	98
28	21	97
34	30	97
9	0	97
36	31	97
21	30	97
35	40	96
27	19	96
32	38	96
26	33	96
34	38	95
31	37	95
21	8	94
39	39	94
21	9	94
3	13	93
12	22	93
40	40	93
24	15	93
38	35	92
19	6	92
34	39	91
35	39	91
0	19	91
27	18	90
28	20	90
36	39	90
33	39	90
31	38	89
0	20	89
37	34	89
27	35	88
30	23	88
42	42	88
39	40	88
7	17	87
34	29	87
35	31	87
33	28	87
22	31	86
33	26	86
42	43	86
9	19	85
35	41	85
41	39	85
37	32	84
29	37	84
23	32	84
39	37	84
38	42	83
24	33	83
20	7	83
39	41	83
32	39	83
18	5	82
34	28	82
38	41	82
10	20	82
24	13	82
14	2	81
28	19	81
27	17	81
16	26	81
35	30	81
5	15	81
4	14	81
29	36	81
23	11	81
25	34	80
38	34	80
40	42	80
25	15	80
24	12	80
39	43	79
40	43	79
37	33	79
36	40	79
29	21	79
22	9	79
17	27	78
40	44	78
28	35	78
40	39	78
12	1	78
26	18	78
39	34	77
37	41	77
23	10	77
0	21	77
38	43	77
26	14	76
27	37	76
40	36	76
40	45	76
42	41	76
6	16	76
40	37	76
33	25	75
24	11	75
34	40	75
25	14	75
25	35	75
34	41	75
39	36	75
15	3	75
39	42	75
26	15	74
36	42	74
30	22	74
40	38	74
33	40	74
43	44	73
26	16	73
21	31	73
39	45	73
41	42	73
17	4	73
34	27	73
29	20	73
41	44	73
1	15	73
36	41	72
41	41	72
32	25	72
20	30	72
14	25	72
8	18	72
39	35	72
35	29	72
35	42	71
41	46	71
42	44	71
28	36	71
29	18	71
19	29	71
28	18	70
41	43	70
34	26	70
26	13	70
2	14	70
32	24	69
31	24	69
17	28	69
4	15	69
30	20	69
28	17	69
28	37	69
27	16	68
37	30	68
23	33	67
43	46	67
31	23	67
1	16	67
27	36	67
30	21	66
32	23	66
41	37	66
3	14	66
36	28	66
18	28	66
23	9	66
37	42	65
31	40	65
31	21	65
41	38	65
25	13	65
33	27	65
35	28	65
32	22	64
44	44	64
42	39	64
16	3	63
43	43	63
25	12	63
30	38	63
29	38	63
41	45	63
19	30	63
26	35	62
11	22	62
38	33	62
0	22	62
24	34	62
31	41	62
37	31	62
27	15	62
42	40	61
33	24	61
43	41	61
41	36	61
31	39	61
29	19	61
34	42	61
22	32	61
31	22	60
20	6	60
44	43	59
31	19	59
32	41	59
36	29	59
44	46	59
43	48	58
16	27	58
34	24	58
12	23	58
36	43	58
46	44	57
31	20	57
40	35	57
1	18	57
43	40	57
30	19	57
33	41	57
35	43	57
37	45	56
42	38	56
42	45	56
23	34	56
18	29	56
34	25	56
36	25	56
28	15	56
43	38	56
45	43	56
45	42	56
38	44	55
39	44	55
45	45	55
35	27	55
21	32	55
47	47	55
46	47	55
18	30	55
31	17	55
7	18	55
45	44	54
26	36	54
44	42	54
13	24	54
43	42	54
45	46	54
45	49	54
15	26	54
27	14	54
43	39	54
36	26	54
32	40	54
21	6	53
30	18	53
45	41	53
41	47	53
49	49	53
29	15	53
32	21	53
29	39	53
24	35	53
46	48	53
30	39	53
28	38	53
41	35	53
22	7	53
0	24	53
37	43	53
44	45	53
34	43	53
2	15	53
40	33	53
24	10	52
42	46	52
46	45	52
0	23	52
1	17	52
30	17	52
39	33	52
44	40	52
31	18	52
20	31	52
46	46	52
15	2	52
43	49	51
18	4	51
10	21	51
29	17	51
47	48	51
36	30	51
26	11	51
27	13	50
29	16	50
44	50	50
38	45	50
9	20	50
47	45	50
30	40	50
49	47	50
42	47	50
33	23	50
47	49	50
43	45	49
26	37	49
32	16	49
47	50	49
33	21	49
22	8	49
24	9	49
35	44	49
34	22	49
38	31	49
28	16	48
35	25	48
46	41	48
19	5	48
21	33	48
3	15	48
34	23	48
44	49	48
32	18	48
9	21	47
33	20	47
32	19	47
28	39	47
37	47	47
35	23	46
28	14	46
32	20	46
26	12	46
20	33	46
10	0	46
35	26	46
36	44	46
42	48	46
13	25	46
23	8	46
38	27	46
47	44	45
44	47	45
44	41	45
39	31	45
8	19	45
38	46	45
46	52	45
48	49	45
36	27	45
38	32	45
46	50	45
51	52	44
52	51	44
48	47	44
22	33	44
42	37	44
33	22	44
43	47	44
34	44	44
5	17	44
39	46	44
3	16	44
29	40	44
25	11	43
25	10	43
47	46	43
39	47	43
45	47	43
33	42	43
30	41	43
16	28	43
40	34	43
12	24	42
15	27	42
49	54	42
47	52	42
37	44	42
44	51	42
53	53	42
1	20	42
2	17	42
20	5	42
30	14	42
41	48	42
30	15	42
48	50	41
4	16	41
49	46	41
4	17	41
46	49	41
34	20	41
36	45	41
40	47	41
37	28	41
48	46	41
21	34	41
50	51	41
5	16	40
36	23	40
41	32	40
41	31	40
37	29	40
47	51	40
51	53	40
24	36	40
13	1	40
46	43	40
37	46	40
40	46	40
6	17	40
35	18	40
38	29	40
26	38	40
30	16	40
0	27	39
35	19	39
38	28	39
52	53	39
10	22	39
40	32	39
43	37	39
42	49	39
42	36	39
45	48	39
1	19	39
49	50	39
35	24	39
31	16	38
34	21	38
33	18	38
19	31	38
28	13	38
27	12	38
33	44	38
27	11	38
29	41	38
25	36	38
24	8	38
29	14	38
48	52	38
48	48	38
45	40	38
5	18	38
11	23	38
45	52	38
49	48	38
44	38	38
48	44	38
31	42	37
41	49	37
41	34	37
42	34	37
31	43	37
37	22	37
38	47	37
51	51	37
34	19	37
32	43	37
37	26	37
40	31	37
50	47	37
39	32	37
54	57	37
40	51	37
25	37	37
35	45	37
50	50	36
2	16	36
44	48	36
25	38	36
49	45	36
44	39	36
50	53	36
14	26	36
28	40	36
51	55	36
33	17	36
48	51	36
21	7	36
52	54	36
45	50	36
32	17	36
36	46	36
48	43	36
19	4	35
49	51	35
37	27	35
31	15	35
31	14	35
29	42	35
0	25	35
35	22	35
41	33	35
22	35	35
28	12	35
50	49	35
50	45	35
36	24	35
47	43	35
17	29	35
52	49	35
39	28	35
8	20	34
2	18	34
52	52	34
32	42	34
6	18	34
28	41	34
58	58	34
22	6	34
39	30	34
32	15	34
45	37	34
51	54	34
11	0	34
39	27	34
49	52	34
11	24	34
42	35	34
53	52	34
41	50	34
38	23	33
45	51	33
29	12	33
41	51	33
46	40	33
50	55	33
27	38	33
46	42	33
40	48	33
52	48	33
56	59	33
36	22	33
53	56	33
52	58	33
17	3	33
48	53	33
52	55	33
20	34	33
46	51	33
48	45	33
37	23	33
40	29	33
43	50	33
56	56	33
45	39	33
37	24	33
37	25	32
18	31	32
40	26	32
34	45	32
60	59	32
49	53	32
50	54	32
47	54	32
52	56	32
31	45	32
37	20	32
38	26	32
20	32	32
30	42	32
48	40	32
42	32	32
49	43	32
44	52	32
53	48	31
10	23	31
50	52	31
3	18	31
3	17	31
56	54	31
40	30	31
55	60	31
43	51	31
25	9	31
36	21	31
7	20	31
54	53	31
45	38	31
42	31	31
42	29	31
24	37	31
42	50	31
19	32	31
38	49	31
54	55	31
26	10	31
38	30	31
33	16	31
51	57	31
32	44	31
55	53	31
38	24	31
42	53	31
54	49	30
24	38	30
50	56	30
13	26	30
45	53	30
57	57	30
39	48	30
43	35	30
55	56	30
35	20	30
23	35	30
43	36	30
39	26	30
48	54	30
39	25	30
39	22	30
51	59	30
47	42	30
30	13	30
44	37	30
54	58	30
7	19	30
50	46	30
43	52	30
54	61	30
38	48	30
42	51	30
51	49	30
58	56	30
52	59	30
16	29	30
50	57	30
35	21	29
34	47	29
50	43	29
51	47	29
22	34	29
63	60	29
53	50	29
2	19	29
44	53	29
56	60	29
57	56	29
55	57	29
41	29	29
40	27	29
44	33	29
40	50	29
55	55	29
52	50	29
51	50	28
47	39	28
40	49	28
40	21	28
46	56	28
56	58	28
36	19	28
47	55	28
26	41	28
58	61	28
39	49	28
54	62	28
41	30	28
55	59	28
21	5	28
16	2	28
43	32	28
0	29	27
26	39	27
14	27	27
39	29	27
46	36	27
52	57	27
58	55	27
51	46	27
43	34	27
47	41	27
53	58	27
25	8	27
46	38	27
42	52	27
49	56	27
51	44	27
29	13	27
59	61	27
54	56	27
61	61	27
47	53	26
27	40	26
53	44	26
54	51	26
23	7	26
62	61	26
22	36	26
48	55	26
36	20	26
46	39	26
41	28	26
54	54	26
33	46	26
60	63	26
60	56	26
56	57	26
53	55	26
53	59	26
6	19	26
34	17	26
60	62	26
0	26	26
43	31	26
56	55	26
60	65	26
47	40	26
63	63	26
38	25	25
37	49	25
49	44	25
54	52	25
39	20	25
18	3	25
53	57	25
36	47	25
35	47	25
32	14	25
28	11	25
61	67	25
23	37	25
51	42	25
55	52	25
13	27	25
65	66	25
55	58	25
35	16	25
57	54	25
51	56	25
40	23	25
40	28	25
30	43	25
56	61	25
33	43	25
44	35	25
58	64	25
15	28	25
33	19	25
42	54	25
29	11	25
48	41	24
20	4	24
19	33	24
39	24	24
39	23	24
27	39	24
43	55	24
50	48	24
59	58	24
54	48	24
52	45	24
23	38	24
32	45	24
56	53	24
34	18	24
49	55	24
1	21	24
57	53	24
31	13	24
31	12	24
54	60	24
54	50	24
43	53	24
35	17	24
16	30	24
31	44	24
41	52	24
51	48	24
39	21	24
27	9	23
14	1	23
55	54	23
43	30	23
36	18	23
25	39	23
40	24	23
53	49	23
44	32	23
52	64	23
63	70	23
9	22	23
43	28	23
48	56	23
49	42	23
15	29	23
57	51	23
5	21	23
42	33	23
39	18	23
42	30	23
46	37	23
52	47	23
48	42	23
38	20	23
68	71	23
56	51	23
42	28	23
47	56	23
18	33	23
57	55	23
46	55	23
11	26	23
57	59	22
8	22	22
42	27	22
17	31	22
58	53	22
58	62	22
52	46	22
58	59	22
57	52	22
12	25	22
56	62	22
54	47	22
23	36	22
38	19	22
46	35	22
62	64	22
1	24	22
50	58	22
46	54	22
39	19	22
51	58	22
43	56	22
36	49	22
49	41	22
10	24	22
53	64	22
53	61	22
53	54	22
24	6	22
24	7	22
44	36	22
59	55	22
53	51	22
61	66	21
63	61	21
0	28	21
28	43	21
59	59	21
59	56	21
22	4	21
55	51	21
3	19	21
34	16	21
53	60	21
53	47	21
58	66	21
3	20	21
3	21	21
56	64	21
64	62	21
52	63	21
32	13	21
65	63	21
38	51	21
46	53	21
55	50	21
51	43	21
1	22	21
1	25	21
51	45	21
28	10	21
44	54	21
44	30	21
14	28	21
27	10	21
33	47	20
47	57	20
58	57	20
57	58	20
9	23	20
55	62	20
57	60	20
57	61	20
45	56	20
45	57	20
56	63	20
55	63	20
47	37	20
60	58	20
60	55	20
35	49	20
56	52	20
34	14	20
34	15	20
50	40	20
46	28	20
6	20	20
35	15	20
50	42	20
71	74	20
45	55	20
37	17	20
22	5	20
22	37	20
50	60	20
17	30	20
22	39	20
54	64	20
17	2	20
40	22	20
41	23	20
63	65	20
62	59	20
61	74	20
65	65	20
43	33	20
37	50	20
62	57	20
39	50	20
33	45	19
44	55	19
47	38	19
31	11	19
64	65	19
30	12	19
45	54	19
37	48	19
40	25	19
64	66	19
40	52	19
43	59	19
43	24	19
53	46	19
53	63	19
60	61	19
54	63	19
54	59	19
60	57	19
28	44	19
43	26	19
43	27	19
69	66	19
66	61	19
21	35	19
49	58	19
58	69	19
52	60	19
34	46	19
67	70	19
45	31	19
18	32	19
50	41	19
17	32	19
57	62	19
38	21	19
27	41	19
37	21	19
64	68	19
37	18	19
61	64	19
33	13	19
26	9	19
41	22	19
61	65	19
44	27	19
26	7	19
2	20	18
60	64	18
63	69	18
59	63	18
61	58	18
62	53	18
47	34	18
65	68	18
25	7	18
50	44	18
48	39	18
4	20	18
49	40	18
65	60	18
66	66	18
37	19	18
33	14	18
33	15	18
67	66	18
48	58	18
36	16	18
62	70	18
58	50	18
11	25	18
59	52	18
64	64	18
51	40	18
62	67	18
66	71	18
51	41	18
58	60	18
62	62	18
48	35	18
59	68	18
43	23	18
41	27	18
41	26	18
45	35	18
64	70	18
59	57	17
44	29	17
62	69	17
56	49	17
7	23	17
44	26	17
59	64	17
62	63	17
1	23	17
15	1	17
43	57	17
30	11	17
46	58	17
70	71	17
42	23	17
65	69	17
41	54	17
57	70	17
48	36	17
64	69	17
41	25	17
8	21	17
0	34	17
0	33	17
58	51	17
64	59	17
56	66	17
42	55	17
51	61	17
51	60	17
16	31	17
46	34	17
58	68	17
20	35	17
63	67	17
47	32	17
29	43	17
39	51	17
63	59	17
68	68	17
55	49	17
67	69	17
6	22	17
46	29	17
45	29	17
38	16	17
44	31	17
45	34	17
60	67	17
61	59	17
60	60	17
49	61	17
38	18	17
27	42	17
60	69	17
55	48	17
50	34	17
38	22	17
61	70	16
4	19	16
49	38	16
57	49	16
36	17	16
64	61	16
45	32	16
61	62	16
47	58	16
30	44	16
0	30	16
64	60	16
48	60	16
35	48	16
13	0	16
65	71	16
1	30	16
52	44	16
36	15	16
46	57	16
43	20	16
55	47	16
13	29	16
67	68	16
49	34	16
63	64	16
61	54	16
49	57	16
39	17	16
58	52	16
21	4	16
57	65	16
10	25	16
67	63	16
63	62	15
53	39	15
21	36	15
12	26	15
42	21	15
49	39	15
47	60	15
60	70	15
43	25	15
40	19	15
62	55	15
47	35	15
14	30	15
47	33	15
58	63	15
16	32	15
47	30	15
56	65	15
0	32	15
82	86	15
19	35	15
65	74	15
30	46	15
47	31	15
58	46	15
37	51	15
61	63	15
56	45	15
48	38	15
45	27	15
7	22	15
59	69	15
72	75	15
45	36	15
54	44	15
59	70	15
57	68	15
32	46	15
35	46	15
76	76	15
45	33	15
54	41	15
23	6	15
48	57	15
36	48	15
57	64	15
59	62	15
68	63	15
34	48	15
18	34	15
74	73	15
2	22	15
43	54	15
57	48	15
70	59	15
12	28	14
57	67	14
77	76	14
41	53	14
78	80	14
61	52	14
55	61	14
70	72	14
70	82	14
6	21	14
71	65	14
64	63	14
73	71	14
9	24	14
36	14	14
50	61	14
50	59	14
8	23	14
26	8	14
67	62	14
41	24	14
61	57	14
47	61	14
19	3	14
19	34	14
48	30	14
50	62	14
69	76	14
4	21	14
4	18	14
33	48	14
47	59	14
41	17	14
46	32	14
53	45	14
69	70	14
0	31	14
60	50	14
35	50	14
66	58	14
27	8	14
66	63	14
66	64	14
21	38	14
12	27	14
63	56	14
50	39	14
74	75	14
59	65	14
34	49	14
53	65	14
38	53	14
72	77	14
72	71	14
56	48	14
1	28	14
68	78	14
62	66	14
28	9	14
23	5	14
44	28	14
46	33	14
69	71	14
49	37	14
30	10	14
55	66	14
37	53	14
63	66	14
49	33	14
39	52	14
60	51	14
56	46	13
64	75	13
26	43	13
58	39	13
45	30	13
31	47	13
31	46	13
66	72	13
64	71	13
44	34	13
50	33	13
48	37	13
62	73	13
22	38	13
7	21	13
44	56	13
61	60	13
80	80	13
50	35	13
47	36	13
50	32	13
51	39	13
26	40	13
59	66	13
52	36	13
70	77	13
52	41	13
52	43	13
70	75	13
68	69	13
46	30	13
63	73	13
70	70	13
42	22	13
46	24	13
68	73	13
55	46	13
44	23	13
32	12	13
65	70	13
56	43	13
40	20	13
57	66	13
49	60	13
66	77	13
17	34	13
42	26	13
60	72	13
41	18	13
45	58	13
35	51	13
69	67	13
66	69	13
73	78	13
66	60	13
47	62	13
51	64	13
55	68	13
60	52	13
60	54	13
58	54	13
53	34	13
15	30	13
77	84	13
40	53	13
62	60	13
21	37	13
49	31	13
66	68	13
49	30	13
69	73	13
56	69	13
69	78	13
48	62	13
69	69	13
75	71	13
55	67	13
9	25	13
44	58	13
45	59	13
74	76	13
52	61	13
52	62	13
59	53	13
67	65	13
44	24	12
44	25	12
54	66	12
42	25	12
52	39	12
51	67	12
51	32	12
56	68	12
56	42	12
52	30	12
50	37	12
52	67	12
32	47	12
50	38	12
56	50	12
41	21	12
49	26	12
38	52	12
49	28	12
50	28	12
45	61	12
36	52	12
49	63	12
46	31	12
57	46	12
56	47	12
45	60	12
51	62	12
45	26	12
49	62	12
45	24	12
45	20	12
40	58	12
38	15	12
54	65	12
44	57	12
70	83	12
68	70	12
65	57	12
67	71	12
59	47	12
73	69	12
60	73	12
67	60	12
65	76	12
61	51	12
24	4	12
75	76	12
61	36	12
77	77	12
59	49	12
59	50	12
25	40	12
75	84	12
15	34	12
71	72	12
65	64	12
28	42	12
30	45	12
59	60	12
24	40	12
59	67	12
1	29	12
15	31	12
67	61	12
24	39	12
15	32	12
82	85	12
59	54	12
5	19	12
68	67	12
19	2	12
79	79	12
2	24	12
75	73	12
[truncated: 8,464 more rows]
