# Supplementary material for: A connectome and analysis of the adult Drosophila central brain
Source: eLife. 2020 Sep 7;9:e57443. doi: 10.7554/eLife.57443 (PMC7546738; doi:10.7554/eLife.57443)
Supplement: Figure 5—source data 1. — Column A: precision; column B: recall; column C: region size. [file elife-57443-fig5-data1.csv]

recall	precision	size
0.957	0.918	1242.263
0.919	0.850	1091.264
0.925	0.898	986.390
0.958	0.939	889.070
0.983	0.952	753.851
0.938	0.883	652.241
0.959	0.933	613.169
0.838	0.875	556.645
0.968	1.000	506.805
0.976	0.953	489.749
0.848	0.933	413.474
1.000	0.976	398.678
0.957	0.882	394.710
0.833	0.859	393.222
1.000	0.936	385.931
0.895	0.934	353.963
0.837	0.923	307.819
0.930	0.939	303.382
0.944	0.919	266.676
0.935	0.935	229.213
0.909	0.889	204.362
0.862	0.812	192.368
0.795	0.934	177.118
0.878	0.906	155.639
0.955	0.894	127.507
0.872	0.895	96.550
0.936	0.957	86.694
0.857	0.800	85.030
0.688	0.955	72.884
0.821	0.859	72.480
0.932	0.895	65.360
0.969	0.838	61.396
0.931	0.897	52.275
0.957	0.846	51.282
1.000	0.906	44.226
0.836	0.907	38.702
0.944	0.944	30.000
0.915	0.915	30.000
0.952	0.909	30.000
0.895	0.962	30.000
0.885	0.821	30.000
0.880	0.898	30.000
0.929	1.000	30.000
