# Supplementary material for: A connectome and analysis of the adult Drosophila central brain
Source: eLife. 2020 Sep 7;9:e57443. doi: 10.7554/eLife.57443 (PMC7546738; doi:10.7554/eLife.57443)
Supplement: Figure 5—source data 2. — Column A: precision; column B: recall; column C: region size. [file elife-57443-fig5-data2.csv]

recall	precision	size
0.732	0.657	1242.263
0.905	0.905	1091.264
0.817	0.728	986.390
0.817	0.845	889.070
0.797	0.898	753.851
0.928	0.829	652.241
0.670	0.756	613.169
0.759	0.769	556.645
0.795	0.795	506.805
0.812	0.888	489.749
0.783	0.755	413.474
0.816	0.922	398.678
0.600	0.732	394.710
0.678	0.829	393.222
0.869	0.844	385.931
0.849	0.755	353.963
0.761	0.864	307.819
0.898	0.841	303.382
0.900	0.703	266.676
0.867	0.850	229.213
0.773	0.895	204.362
0.725	0.767	192.368
0.771	0.778	177.118
0.810	0.896	155.639
0.667	0.579	127.507
0.769	0.851	96.550
0.892	0.767	86.694
0.687	0.917	85.030
0.546	0.822	72.884
0.727	0.853	72.480
0.734	0.678	65.360
0.833	0.714	61.396
0.878	0.615	52.275
0.798	0.910	51.282
0.863	0.603	44.226
0.754	0.852	38.702
0.793	0.852	30.000
0.788	0.872	30.000
0.840	0.875	30.000
0.892	0.892	30.000
0.760	0.817	30.000
0.654	0.879	30.000
0.842	0.949	30.000
