# Supplementary material for: A connectome and analysis of the adult Drosophila central brain
Source: eLife. 2020 Sep 7;9:e57443. doi: 10.7554/eLife.57443 (PMC7546738; doi:10.7554/eLife.57443)
Supplement: Figure 8—source data 1. — Column A: index number; column B: first ROI name; column C: second ROI name; column D: boundary area in square microns; column E: number of neurons crossings; column F: number of distinct neurons that cross; column G: (crossings - number of neurons) per area. [file elife-57443-fig8-data1.csv]

	roi1	roi2	boundarysize	crossings	neurons	crossings_minus_neurons_per_area
0	FB	SMP(R)	1106.313216	509	165	0.3109426833422191
1	AB(R)	FB	418.643968	813	164	1.55024328452763
2	ATL(R)	SMP(R)	2133.262336	3215	885	1.0922238492097018
3	CRE(R)	SIP(R)	1413.152768	3232	820	1.706821834566155
4	SIP(R)	SMP(R)	9187.753983999999	20542	2902	1.9199469239946076
5	SCL(R)	SMP(R)	3091.98848	4658	1350	1.0698616833139043
6	ICL(R)	SCL(R)	4307.877888	8574	2238	1.47079377938022
7	SIP(R)	SLP(R)	6538.461184	14985	2224	1.9516824587453268
8	SLP(R)	SMP(R)	1543.1106559999998	3280	1008	1.4723506646564173
9	AB(L)	FB	336.85504	943	122	2.4372501595938716
10	BU(R)	FB	639.434752	440	62	0.5911471011197089
11	FB	ICL(R)	1661.403136	1171	197	0.5862514514959962
12	CA(R)	SLP(R)	1341.325312	2436	474	1.462732405365955
13	LH(R)	SLP(R)	6488.326144	12105	2075	1.5458532412516162
14	LH(R)	SCL(R)	1924.1369599999998	4369	1078	1.7103772072441248
15	AVLP(R)	SCL(R)	2183.462912	4415	1521	1.325417520991536
16	AVLP(R)	PVLP(R)	15511.06048	28191	2845	1.6340597751315067
17	AVLP(R)	PLP(R)	456.19609599999995	901	460	0.9666895527312888
18	SCL(R)	SLP(R)	6221.660159999999	13871	3489	1.668686449116501
19	PLP(R)	SCL(R)	2225.9302399999997	5347	1693	1.6415608783858386
20	SPS(R)	VES(R)	1909.456896	3353	848	1.3118913578240836
21	IB	SPS(R)	4114.153472	7151	1764	1.3093823642367028
22	GOR(R)	SPS(R)	871.9564799999999	957	354	0.6915482754368659
23	GOR(R)	ICL(R)	924.975104	1406	587	0.8854292363743447
24	PLP(R)	SPS(R)	8139.046912	12078	1969	1.2420373182879132
25	SPS(R)	WED(R)	1762.3285759999999	2271	773	0.8500117517245548
26	VES(R)	WED(R)	1560.1500159999998	1899	468	0.9172194887187055
27	BU(R)	SIP(R)	465.895424	449	133	0.6782637985300324
28	CRE(R)	aL(R)	369.36089599999997	417	167	0.676844795178318
29	LAL(R)	aL(R)	103.940096	96	45	0.49066723971469106
30	LAL(R)	gL(R)	195.95264	165	88	0.3929520929138796
31	CRE(R)	gL(R)	6829.113343999999	8245	982	1.0635348447366464
32	PLP(R)	PVLP(R)	8082.489344	12041	2417	1.190722262707879
33	AVLP(R)	LH(R)	1918.173184	4599	1177	1.7839890728031365
34	PLP(R)	SLP(R)	148.70118399999998	420	270	1.008734402545174
35	LH(R)	PLP(R)	3541.172224	6749	1157	1.5791381063311989
36	AOTU(R)	SLP(R)	1733.6238079999998	1538	442	0.6322017469663177
37	SCL(R)	SIP(R)	3207.33184	5208	1370	1.196633273842971
38	AOTU(R)	SIP(R)	1757.216768	3468	591	1.637248205453045
39	CA(R)	SCL(R)	620.9535999999999	1012	282	1.175611188984169
40	AL(R)	VES(R)	1811.218432	2399	388	1.1103023050507472
41	CRE(R)	SMP(R)	6675.562496	19213	1764	2.6138621292895468
42	CRE(R)	LAL(R)	4094.2305279999996	9832	1320	2.0790231379956143
43	SIP(R)	aL(R)	3884.843008	3874	690	0.8195955392388408
44	ICL(R)	PLP(R)	4258.988032	7728	2006	1.343511641030129
45	BU(R)	LAL(R)	835.7806079999999	1115	201	1.093588426497687
46	PLP(R)	WED(R)	3134.128128	5013	1097	1.2494702960657007
47	BU(R)	CRE(R)	243.99052799999998	215	50	0.67625576022361
48	aL(R)	gL(R)	1462.960128	1140	374	0.5235959513450253
49	ATL(R)	PB	1064.173568	702	148	0.5205917687292154
50	PED(R)	PLP(R)	1737.162752	1605	343	0.7264719431423775
51	ICL(R)	PED(R)	1699.610624	1255	393	0.5071749892756613
52	AVLP(R)	SLP(R)	1538.654208	3397	1297	1.3648290753577819
53	ICL(R)	SPS(R)	2392.195072	4268	1342	1.223144397481645
54	SMP(R)	gL(R)	68.15744	130	57	1.0710496168870194
55	GOR(R)	IB	1528.3650559999999	2820	685	1.3969175699342868
56	GOR(R)	VES(R)	680.656896	784	329	0.6684718874867611
57	EPA(R)	VES(R)	999.3584639999999	1829	735	1.0947022909289135
58	EPA(R)	ICL(R)	1245.0529279999998	2019	683	1.0730467516317508
59	LAL(R)	VES(R)	3952.9349119999997	7047	952	1.5418923244845981
60	EB	LAL(R)	331.808768	130	54	0.22904759406478373
61	NO	VES(R)	813.105152	550	132	0.5140786514165391
62	CRE(R)	bL(R)	3277.7175039999997	2003	427	0.48082240097772627
63	PED(R)	gL(R)	666.50112	1532	898	0.9512362109759095
64	AOTU(R)	SCL(R)	290.12787199999997	498	269	0.7893071369578722
65	ICL(R)	PVLP(R)	1672.675328	1715	524	0.7120329809754927
66	AVLP(R)	ICL(R)	608.82944	1157	563	0.9756427021663079
67	PED(R)	SCL(R)	3257.532416	2937	611	0.714037407141492
68	EPA(R)	PVLP(R)	896.466944	1226	490	0.8210007127714014
69	BU(R)	PED(R)	137.29792	115	65	0.36417157667064437
70	aL(R)	bL(R)	467.92704	1466	935	1.13479229582458
71	PED(R)	aL(R)	367.067136	1241	1042	0.5421351586212283
72	EB	FB	882.8354559999999	312	117	0.22087921217337245
73	ICL(R)	SMP(R)	749.07648	1259	554	0.9411589054297901
74	AME(R)	PVLP(R)	557.645824	359	88	0.4859715402441533
75	SMP(R)	aL(R)	9.699328	1	1	0.0
76	bL(R)	gL(R)	1759.5760639999999	709	194	0.29268413598970167
77	LAL(R)	NO	313.393152	156	51	0.3350424198164994
78	ATL(R)	IB	1467.35104	2185	731	0.9909012638175525
79	CA(R)	PED(R)	242.614272	834	814	0.08243538121285791
80	AL(R)	LAL(R)	3729.784832	1228	269	0.2571193897761017
81	AL(R)	AVLP(R)	797.7041919999999	279	78	0.251973102330143
82	EPA(R)	GOR(R)	646.905856	1024	435	0.910487970602016
83	IB	ICL(R)	1225.326592	2878	954	1.5701936223057176
84	AVLP(R)	PED(R)	330.498048	304	113	0.5779156674474519
85	EPA(R)	LAL(R)	2083.1928319999997	3425	881	1.2212023586686382
86	BU(R)	ICL(R)	363.26604799999996	96	30	0.18168502221270072
87	LH(R)	PVLP(R)	44.433408	21	14	0.1575391201143068
88	AVLP(R)	gL(R)	166.985728	41	20	0.1257592505151099
89	EB	bL(R)	370.14732799999996	171	57	0.30798547328700426
90	CA(R)	ICL(R)	216.662016	90	65	0.11538709212416819
91	CA(R)	PLP(R)	22.282239999999998	27	27	0.0
92	LAL(R)	bL(R)	208.994304	48	30	0.08612674917685795
93	LAL(R)	WED(R)	537.526272	926	514	0.7664741640758352
94	AOTU(R)	gL(R)	163.643392	98	37	0.3727617672456948
95	PVLP(R)	WED(R)	3092.054016	4230	946	1.0620771768561497
96	AVLP(R)	LAL(R)	883.163136	741	215	0.5955864534635649
97	LAL(R)	PVLP(R)	2061.43488	2367	584	0.8649315179919728
98	EPA(R)	SPS(R)	296.419328	455	306	0.50266627687652
99	AVLP(R)	WED(R)	2861.367296	4207	915	1.150498925671652
100	FB	GOR(R)	48.693248	57	27	0.6161018463997309
101	ICL(R)	LAL(R)	286.39232	150	82	0.237436534610984
102	AL(R)	CRE(R)	368.31232	46	21	0.06787717554492882
103	FB	SCL(R)	60.751872	57	12	0.7407179156553398
104	BU(R)	SCL(R)	51.970048	9	7	0.038483705075662046
105	GOR(R)	PLP(R)	114.556928	102	59	0.37535922751001144
106	IB	PB	100.663296	71	24	0.4669030507405599
107	EPA(R)	PLP(R)	55.836672	72	46	0.4656437976819249
108	CA(R)	SMP(R)	12.517375999999999	7	6	0.0798889479712042
109	PVLP(R)	SPS(R)	177.471488	139	74	0.3662560151634047
110	EB	NO	221.642752	6	2	0.018047059801892373
111	ICL(R)	PB	23.789568	1	1	0.0
