# Supplementary material for: A connectome and analysis of the adult Drosophila central brain
Source: eLife. 2020 Sep 7;9:e57443. doi: 10.7554/eLife.57443 (PMC7546738; doi:10.7554/eLife.57443)
Supplement: Figure 11—source data 1. — Column A: region name; column B: number of cell types. [file elife-57443-fig11-data1.csv]

	count
SLP(R)	1843
SMP(R)	1564
PLP(R)	1437
AVLP(R)	1230
SCL(R)	1215
SIP(R)	964
ICL(R)	939
LH(R)	883
SPS(R)	876
PVLP(R)	737
WED(R)	676
LAL(R)	655
CRE(R)	595
IB	576
VES(R)	421
AL(R)	336
IPS(R)	333
GNG	227
SAD	220
FB	214
LO(R)	207
EPA(R)	139
AOTU(R)	134
ATL(R)	130
GOR(R)	128
CA(R)	82
gL(R)	53
EB	40
AME(R)	29
NO	28
PB	26
BU(R)	26
b'L(R)	25
LOP(R)	21
a'L(R)	20
aL(R)	19
bL(R)	16
PED(R)	16
FLA(R)	14
AB(R)	12
CAN(R)	11
ME(R)	10
PRW	0
