# Supplementary material for: A connectome and analysis of the adult Drosophila central brain
Source: eLife. 2020 Sep 7;9:e57443. doi: 10.7554/eLife.57443 (PMC7546738; doi:10.7554/eLife.57443)
Supplement: Figure 12—source data 1. — Column A: number of instances of a cell; column B: Number of cell types with that number of instances. [file elife-57443-fig12-data1.csv]

	count
1	2044
2	1800
3	681
4	490
5	168
6	115
7	34
8	42
9	17
10	7
11	8
12	16
13	2
14	10
15	11
16	7
17	7
18	14
19	4
20	7
>20	130
