# Supplementary material for: A connectome and analysis of the adult Drosophila central brain
Source: eLife. 2020 Sep 7;9:e57443. doi: 10.7554/eLife.57443 (PMC7546738; doi:10.7554/eLife.57443)
Supplement: Figure 15—source data 1. — The histograms shown are computed from the columns 'final upstream perc' and 'final downstream perc'. [file elife-57443-fig15-data1.csv]

assignment	bodyId	class	status	pre	post	tbar good	tbar seg good	psd good	psd seg good	not sure	upstream good	downstream good	all good	upstream total	downstream total	exists upstream	exists upstream good	exists downstream	exists downstream good	comments	tasks	tbar good %	tbar seg good %	psd good %	psd seg good %	not sure %	orig upstream perc	orig downstream perc	upstream good %	downstream good %	upstream good perc	downstream good perc	exists upstream good %	exists downstream good %	all good %	comment list	user	redo assignment	redo bodyId	redo tbar good	redo tbar seg good	redo psd good	redo psd seg good	redo upstream good	redo downstream good	redo tbar good %	redo tbar seg good %	redo psd good %	redo psd seg good %
1497973422_put_PVL05oc	1497973422	PVL05oc_pct	Roughly traced	120	8658	33	50	29	48	2	6	23	28	25	25	23	6	24	22	3	50	0.66	1	0.58	0.96	0.04	24	92	0.24	0.92	24	92	0.260869565	0.916666667	0.56	['False merge in psd at (14980, 19682, 25316)', 'False merge in psd at (16759, 18752, 25452)', 'Low Confidence psd']		1497973422_combined_results_1000.csv	1497973422	33	50	29	48	6	23	0.66	1	0.58	0.96
ogundeyio-connection_validation-424720670_put_ADM04t(AMDF)_R-complete	424720670	ADM04t_pct	Roughly traced	27	500	49	49	31	50	0	13	18	31	25	25	25	13	25	18	0	50	0.98	0.98	0.62	1	0	52	72	0.52	0.72	52	72	0.52	0.72	0.62	[]	rymert	424720670_combined_results_mb.csv	424720670	47	49	31	50	12	19	0.94	0.98	0.62	1
1342863468_put_PVM01ob	1342863468	PVM01ob_pct	Roughly traced	81	437	46	50	30	50	3	11	19	30	25	25	22	10	25	19	3	50	0.92	1	0.6	1	0.06	44	76	0.44	0.76	44	76	0.454545455	0.76	0.6	['Low Confidence psd', 'Low Confidence psd', 'Low Confidence psd']		1342863468_combined_results_1000.csv	1342863468	45	50	31	50	12	19	0.9	1	0.62	1
ogundeyio-connection_validation-5813042659_MBON22(calyx)(PLPF3)_R-complete	5813042659	MBON22	Roughly traced	810	14114	44	50	38	50	3	15	23	38	25	25	25	15	25	23	3	50	0.88	1	0.76	1	0.06	60	92	0.6	0.92	60	92	0.6	0.92	0.76	['Synapse needs to be moved slightly to the left', 'Low Confidence psd', 'Low Confidence psd']	rymert	5813042659_combined_results_mb.csv	5813042659	42	50	36	50	12	24	0.84	1	0.72	1
329574917_put_PDL07t	329574917	PDL07t_pct	Roughly traced	629	1448	49	50	30	50	2	12	18	30	25	25	22	12	22	17	2	50	0.98	1	0.6	1	0.04	48	72	0.48	0.72	48	72	0.545454546	0.772727273	0.6	['Low Confidence psd', 'Low Confidence psd']		329574917_combined_results_1000.csv	329574917	49	50	32	50	14	18	0.98	1	0.64	1
ogundeyio-connection_validation-424767514_MBON11(y1pedc>a_B)(mAOTU2)_R-complete	424767514	MBON11	Traced	1646	27642	47	48	40	49	4	15	25	40	24	26	24	15	26	25	5	50	0.94	0.96	0.8	0.98	0.08	62.5	96.15384615	0.625	0.961538462	62.5	96.15384615	0.625	0.961538462	0.8	['Autapse', 'Synapse belongs to psd but segmentation merge in Tbar prevents this demarcation', 'Low Confidence psd', 'Low Confidence psd', 'Autapse and possible false merge']	smithc	424767514_combined_results_mb_retry.csv	424767514	46	48	40	49	15	25	0.92	0.96	0.8	0.98
ordishc-connection_validation-670883838_(iPB3)_R-complete	670883838	PDM06r_a_pct	Roughly traced	222	584	50	50	36	50	0	17	19	36	25	25	25	17	25	19	0	50	1	1	0.72	1	0	68	76	0.68	0.76	68	76	0.68	0.76	0.72	[]	takemurasa	670883838_combined_results_mb_retry.csv	670883838	50	50	32	50	15	17	1	1	0.64	1
768132738_put_PDL22c	768132738	PDL22c_pct	Roughly traced	85	147	48	50	33	50	0	15	18	33	25	25	25	15	23	17	0	50	0.96	1	0.66	1	0	60	72	0.6	0.72	60	72	0.6	0.739130435	0.66	[]		768132738_combined_results_1000.csv	768132738	48	50	34	50	15	19	0.96	1	0.68	1
lohffa-connection_validation-799868224_LL10(ABDL)_R-complete	799868224	AoSiLVe-LVeSpIp(c)	Roughly traced	538	15079	42	48	38	49	4	15	23	36	26	24	26	15	24	23	4	50	0.84	0.96	0.76	0.98	0.08	57.69230769	95.83333333	0.576923077	0.958333333	57.69230769	95.83333333	0.576923077	0.958333333	0.72	['T-bar and PSD not valid?', 'T-bar and PSD not valid?', 'PSD not valid?', 'PSD not valid?']	lohffa	799868224_combined_results_mb_retry.csv	799868224	42	49	39	50	15	24	0.84	0.98	0.78	1
ordishc-connection_validation-894020730_MBON31(a'1a)(ABDL)_R-complete	894020730	MBON31	Roughly traced	1085	10435	44	50	36	50	0	15	21	36	25	25	25	15	25	21	0	50	0.88	1	0.72	1	0	60	84	0.6	0.84	60	84	0.6	0.84	0.72	[]	ordishc	894020730_combined_results_mb_retry.csv	894020730	44	50	37	50	15	22	0.88	1	0.74	1
1073729578_put_PVL06v	1073729578	PVL06v_a_pct	Roughly traced	429	1022	49	50	36	50	3	16	20	36	25	25	23	15	23	20	3	50	0.98	1	0.72	1	0.06	64	80	0.64	0.8	64	80	0.652173913	0.869565217	0.72	['Low Confidence psd', 'Low Confidence psd', 'Low Confidence psd']		1073729578_combined_results_1000.csv	1073729578	49	50	37	50	15	22	0.98	1	0.74	1
ogundeyio-connection_validation-1234386037_MBON07(a1)_R-complete	1234386037	MBON07	Roughly traced	512	15486	42	50	36	50	4	14	22	36	25	25	25	14	25	22	4	50	0.84	1	0.72	1	0.08	56	88	0.56	0.88	56	88	0.56	0.88	0.72	['Low Confidence psd', 'Low Confidence psd', 'Low Confidence Tbar', 'Low Confidence psd']	rymert	1234386037_combined_results_mb.csv	1234386037	43	50	37	50	15	22	0.86	1	0.74	1
ogundeyio-connection_validation-5813020828_MBON18(a2sc)(SFS1)_R-complete	5813020828	MBON18	Roughly traced	663	12965	41	49	35	49	2	15	20	35	25	25	25	15	25	20	2	50	0.82	0.98	0.7	0.98	0.04	60	80	0.6	0.8	60	80	0.6	0.8	0.7	['Low Confidence psd', 'Synapse belongs on the psd body and will create autapse. Bad segmentation merge makes Tbar seem separate from psd']	lohffa	5813020828_combined_results_mb_retry.csv	5813020828	41	49	37	49	15	22	0.82	0.98	0.74	0.98
ogundeyio-connection_validation-5813026661_put_ADM04h(AMDF)_R-complete	5813026661	ADM04h_pct	Roughly traced	685	4091	50	50	32	50	3	13	19	32	25	25	25	13	25	19	2	50	1	1	0.64	1	0.06	52	76	0.52	0.76	52	76	0.52	0.76	0.64	['Low Confidence psd', 'Low Confidence psd']	ordishc	5813026661_combined_results_mb.csv	5813026661	50	50	34	50	15	19	1	1	0.68	1
ogundeyio-connection_validation-613420343_put_ADM01oc(SMPF)_R-complete	613420343	ADM01oc_pct	Roughly traced	469	2518	49	50	37	50	6	15	22	37	25	25	25	15	25	22	6	50	0.98	1	0.74	1	0.12	60	88	0.6	0.88	60	88	0.6	0.88	0.74	['Low Confidence psd', 'Low Confidence psd', 'Low Confidence psd', 'Low Confidence psd', 'Low Confidence psd', 'Low Confidence psd']	rymert	613420343_combined_results_mb_retry.csv	613420343	48	50	38	50	16	22	0.96	1	0.76	1
727285326_put_PDM05k	727285326	PDM05of_pct	Roughly traced	125	678	45	49	39	50	2	20	19	38	25	25	23	18	23	18	2	50	0.9	0.98	0.78	1	0.04	80	76	0.8	0.76	80	76	0.782608696	0.782608696	0.76	['Low Confidence psd', 'Low Confidence Tbar. False merge to glia.']		727285326_combined_results_1000.csv	727285326	42	49	38	50	16	22	0.84	0.98	0.76	1
takemurasa-connection_validation-767903933_(pLH12)_R-complete	767903933	PDL21b_pct	Roughly traced	851	1312	48	50	37	49	1	18	19	36	25	25	25	18	25	19	2	50	0.96	1	0.74	0.98	0.02	72	76	0.72	0.76	72	76	0.72	0.76	0.72	['Split todo placed', 'Low confident PSD']	lohffa	767903933_combined_results_mb.csv	767903933	48	50	32	50	16	16	0.96	1	0.64	1
rymert-connection_validation-796733296_put_ADL12p(dAOTU1)_R-complete	796733296	ADL12p_pct	Roughly traced	447	1290	47	50	39	48	0	16	23	38	25	25	25	16	25	23	1	50	0.94	1	0.78	0.96	0	64	92	0.64	0.92	64	92	0.64	0.92	0.76	['PSD needs splitting']	takemurasa	796733296_combined_results_mb.csv	796733296	46	50	40	48	16	24	0.92	1	0.8	0.96
lohffa-connection_validation-1040393594_PB10_L3(_C3_)-complete	1040393594	PFGs	Roughly traced	690	3123	43	50	40	50	5	17	23	40	25	25	25	17	25	23	9	50	0.86	1	0.8	1	0.1	68	92	0.68	0.92	68	92	0.68	0.92	0.8	['PSD not valid?', 'PSD not valid?', 'low confidence PSD placement', 'low confidence PSD placement', 'PSD not valid?', 'PSD not valid?', 'low confidence PSD placement', 'PSD not valid?', 'low confidence PSD placement']	takemurasa	1040393594_combined_results_cx.csv	1040393594	42	50	40	50	16	24	0.84	1	0.8	1
1166186949_put_PVL05v	1166186949	PVL05v_pct	Roughly traced	1036	4987	49	50	34	49	4	13	21	34	25	25	19	12	23	21	4	50	0.98	1	0.68	0.98	0.08	52	84	0.52	0.84	52	84	0.631578947	0.913043478	0.68	['Low Confidence psd', 'False merge with glia', 'Very Low Confidence psd', 'Low Confidence psd']		1166186949_combined_results_1000.csv	1166186949	49	50	39	50	16	23	0.98	1	0.78	1
ogundeyio-connection_validation-1603757560_put_ADM06j(mAOTU3)_R-complete	1603757560	ADM06j_pct	Roughly traced	166	6563	49	50	37	50	1	13	24	37	25	25	25	13	25	24	1	50	0.98	1	0.74	1	0.02	52	96	0.52	0.96	52	96	0.52	0.96	0.74	['Low Confidence psd']	ogundeyio	1603757560_combined_results_mb_retry.csv	1603757560	48	50	40	50	16	24	0.96	1	0.8	1
takemurasa-connection_validation-1817712927_put_ADM10d(ABDL)_R-complete	1817712927	ADM10d_pct	Roughly traced	357	5109	45	50	37	49	1	13	24	37	24	26	24	13	26	24	1	50	0.9	1	0.74	0.98	0.02	54.16666667	92.30769231	0.541666667	0.923076923	54.16666667	92.30769231	0.541666667	0.923076923	0.74	['Lower confidence PSD']	ordishc	1817712927_combined_results_mb_retry.csv	1817712927	43	50	38	49	16	22	0.86	1	0.76	0.98
ogundeyio-connection_validation-5813057216_put_ADL23e(LBDL9)_R-complete	5813057216	ADL23e_pct	Roughly traced	611	2391	50	50	40	50	1	17	23	40	25	25	25	17	25	23	1	50	1	1	0.8	1	0.02	68	92	0.68	0.92	68	92	0.68	0.92	0.8	['Low Confidence psd']	lohffa	5813057216_combined_results_mb_retry.csv	5813057216	50	50	39	49	16	23	1	1	0.78	0.98
ogundeyio-connection_validation-297860627_put_ADL09c(LBDL10)_R-complete	297860627	ADL09c_a_pct	Roughly traced	72	397	46	50	39	50	0	18	21	39	25	25	25	18	25	21	0	50	0.92	1	0.78	1	0	72	84	0.72	0.84	72	84	0.72	0.84	0.78	[]	lohffa	297860627_combined_results_mb.csv	297860627	46	50	37	50	17	20	0.92	1	0.74	1
ogundeyio-connection_validation-360578457_put_ADL13c(LBDL1)_R-complete	360578457	ADL13t_pct	Roughly traced	200	684	48	50	33	50	4	13	20	33	25	25	25	13	25	20	4	50	0.96	1	0.66	1	0.08	52	80	0.52	0.8	52	80	0.52	0.8	0.66	['Low Confidence psd', 'Low Confidence psd', 'Low Confidence psd', 'Low Confidence psd']	rymert	360578457_combined_results_mb.csv	360578457	47	50	37	50	17	20	0.94	1	0.74	1
ordishc-connection_validation-422742649_FB06od(igL1)_R-complete	422742649	FB6X	Roughly traced	310	1582	50	50	36	49	0	17	19	35	25	25	25	17	25	19	0	50	1	1	0.72	0.98	0	68	76	0.68	0.76	68	76	0.68	0.76	0.7	[]	lohffa	422742649_combined_results_cx.csv	422742649	50	50	37	50	17	20	1	1	0.74	1
ogundeyio-connection_validation-448908822_(pLH8)_R-complete	448908822	PDL26f_pct	Roughly traced	557	951	49	50	32	50	1	15	17	32	25	25	25	15	25	17	1	50	0.98	1	0.64	1	0.02	60	68	0.6	0.68	60	68	0.6	0.68	0.64	['Low Confidence psd']	ogundeyio	448908822_combined_results_mb.csv	448908822	49	50	37	50	17	20	0.98	1	0.74	1
ogundeyio-connection_validation-449250041_put_ADL20a(LBDL13)_R-complete	449250041	ADL20a_pct	Roughly traced	511	1286	48	50	39	49	3	17	22	38	25	25	25	17	25	22	3	50	0.96	1	0.78	0.98	0.06	68	88	0.68	0.88	68	88	0.68	0.88	0.76	['Low Confidence psd', 'Splittodo was placed on where split is needed', 'Low Confidence psd']	lohffa	449250041_combined_results_mb_retry.csv	449250041	48	49	38	50	17	21	0.96	0.98	0.76	1
479912747_put_ADL07b	479912747	ADL07b_pct	Roughly traced	846	2314	46	48	36	50	1	16	20	35	25	25	20	15	23	19	1	50	0.92	0.96	0.72	1	0.02	64	80	0.64	0.8	64	80	0.75	0.826086957	0.7	['Unsure if T-bar']		479912747_combined_results_1000.csv	479912747	46	49	38	50	17	21	0.92	0.98	0.76	1
ordishc-connection_validation-480276374_put_ADL07r(dlLHT)_R-complete	480276374	ADL07r_pct	Roughly traced	309	426	48	50	35	50	0	16	19	35	25	25	25	16	25	19	0	50	0.96	1	0.7	1	0	64	76	0.64	0.76	64	76	0.64	0.76	0.7	[]	smithc	480276374_combined_results_mb.csv	480276374	48	50	35	50	17	18	0.96	1	0.7	1
lohffa-connection_validation-642732835_MBON32(y2)(agL1)_R-complete	642732835	MBON32	Roughly traced	687	15097	44	47	40	50	0	16	24	39	25	25	25	16	25	24	4	50	0.88	0.94	0.8	1	0	64	96	0.64	0.96	64	96	0.64	0.96	0.78	['T-bar is placed correctly, but the segmentation is wrong. T-bar and PSD are same body', 'low confidence PSD placement', 'T-bar registered to wrong body', 'Multiple T-bars']	ogundeyio	642732835_combined_results_mb_retry.csv	642732835	44	47	41	50	17	24	0.88	0.94	0.82	1
ogundeyio-connection_validation-674446014_put_ADM05p(mAOTU2)_R-complete	674446014	ADM05p_a_pct	Roughly traced	276	1344	49	50	35	50	3	15	20	35	25	25	25	15	25	20	3	50	0.98	1	0.7	1	0.06	60	80	0.6	0.8	60	80	0.6	0.8	0.7	['Low Confidence psd', 'Low Confidence psd', 'Low Conifidence psd']	smithc	674446014_combined_results_mb_retry.csv	674446014	49	50	35	50	17	18	0.98	1	0.7	1
rymert-connection_validation-693927941_(pFBB4)_R-complete	693927941	PDM13oc_pct	Roughly traced	406	1552	49	49	39	49	0	17	22	38	25	25	25	17	25	22	0	50	0.98	0.98	0.78	0.98	0	68	88	0.68	0.88	68	88	0.68	0.88	0.76	[]	smithc	693927941_combined_results_mb.csv	693927941	49	50	41	49	17	24	0.98	1	0.82	0.98
lohffa-connection_validation-733036127_MBON07(a1)(ABDL)_R-complete	733036127	MBON07	Roughly traced	474	15513	43	50	39	50	1	16	23	39	25	25	25	16	25	23	1	50	0.86	1	0.78	1	0.02	64	92	0.64	0.92	64	92	0.64	0.92	0.78	['PSD not valid?']	ogundeyio	733036127_combined_results_mb_retry.csv	733036127	42	50	42	50	17	25	0.84	1	0.84	1
smithc-connection_validation-792040520_(aPBB)_R-complete	792040520	PDM28p_pct	Traced	2754	3460	46	50	31	50	5	13	18	31	25	25	25	13	25	18	5	50	0.92	1	0.62	1	0.1	52	72	0.52	0.72	52	72	0.52	0.72	0.62	['Not sure T-bar glyph is on a valid T-bar', 'Not sure T-bar glyph is on a valid T-bar', 'Not sure T-bar glyph is on a valid T-bar', 'Not sure T-bar glyph is on a valid T-bar', 'T-bar glyph is on the PSD and PSD glyph is on the T-bar']	ogundeyio	792040520_combined_results_mb_retry.csv	792040520	46	50	35	50	17	18	0.92	1	0.7	1
smithc-connection_validation-916646779_FB_Q11_C6_R-complete	916646779	FS3B	Roughly traced	53	426	46	50	37	50	1	17	20	37	25	25	25	17	25	20	4	50	0.92	1	0.74	1	0.02	68	80	0.68	0.8	68	80	0.68	0.8	0.74	['T-bar glyph is on a PSD', 'T-bar glyph is on a PSD', 'T-bar glyph is on a PSD', 'Not sure the T-bar glyph is on a valid T-bar']	rymert	916646779_combined_results_cx.csv	916646779	44	48	39	50	17	22	0.88	0.96	0.78	1
ogundeyio-connection_validation-944146138_PLP_SCL(PLPF7)_R-complete	944146138	PVL09c_pct	Traced	2162	2020	48	50	27	50	3	15	12	27	25	25	25	15	25	12	3	50	0.96	1	0.54	1	0.06	60	48	0.6	0.48	60	48	0.6	0.48	0.54	['Low Confidence psd', 'Low Confidence psd', 'Low Confidence psd']	smithc	944146138_combined_results_mb.csv	944146138	48	50	31	50	17	14	0.96	1	0.62	1
ogundeyio-connection_validation-978021140_Delta6a_01-complete	978021140	Delta6A	Roughly traced	448	4225	49	50	35	50	0	17	18	35	25	25	25	17	25	18	0	50	0.98	1	0.7	1	0	68	72	0.68	0.72	68	72	0.68	0.72	0.7	[]	ordishc	978021140_combined_results_cx.csv	978021140	49	50	38	50	17	21	0.98	1	0.76	1
ogundeyio-connection_validation-1048215779_MBON09(y3B'1)(AMVF4)_L_002-complete	1048215779	MBON09	Traced	1451	20263	44	50	38	50	3	16	22	38	25	25	25	16	25	22	4	50	0.88	1	0.76	1	0.06	64	88	0.64	0.88	64	88	0.64	0.88	0.76	['Low Confidence psd', 'Very Low Confidence psd', 'Low Confidence psd', 'Low Confidence psd']	rymert	1048215779_combined_results_mb_retry.csv	1048215779	46	50	41	50	17	24	0.92	1	0.82	1
ogundeyio-connection_validation-1102191395_FB05r(igL1)_R-complete	1102191395	FB5P	Roughly traced	259	920	50	50	40	50	5	17	23	40	25	25	25	17	25	23	6	50	1	1	0.8	1	0.1	68	92	0.68	0.92	68	92	0.68	0.92	0.8	['Low Confidence Tbar and psd', 'Low Confidence psd', 'Low Confidence psd', 'Low Confidence psd', 'Low Confidence psd', 'Low Confidence psd']	rymert	1102191395_combined_results_cx.csv	1102191395	50	50	37	50	17	20	1	1	0.74	1
1260914538_put_AVL02i	1260914538	AVL02i_pct	Roughly traced	459	690	47	50	35	49	3	18	17	34	25	25	20	17	20	15	3	50	0.94	1	0.7	0.98	0.06	72	68	0.72	0.68	72	68	0.85	0.75	0.68	["Can't identify T-bar", "Can't find T-bar", 'Unsure if PSD makes it in cleft']		1260914538_combined_results_1000.csv	1260914538	47	50	35	49	17	18	0.94	1	0.7	0.98
ogundeyio-connection_validation-1321162590_Delta12f-complete	1321162590	Delta0J	Roughly traced	131	805	50	50	35	50	0	17	18	35	25	25	25	17	25	18	1	50	1	1	0.7	1	0	68	72	0.68	0.72	68	72	0.68	0.72	0.7	['Autapse']	ogundeyio	1321162590_combined_results_cx.csv	1321162590	50	50	37	50	17	20	1	1	0.74	1
ogundeyio-connection_validation-1812497812_put_ADM06e(mAOTU3)_R-complete	1812497812	ADM06e_pct	Roughly traced	341	722	49	50	31	49	2	14	17	31	25	25	25	14	25	17	3	50	0.98	1	0.62	0.98	0.04	56	68	0.56	0.68	56	68	0.56	0.68	0.62	['Low Confidence psd', 'False merge merging two bodies as psd', 'Low Conference psd']	ordishc	1812497812_combined_results_mb.csv	1812497812	49	50	36	50	17	19	0.98	1	0.72	1
rymert-connection_validation-5813020673_SMP_SMP(pLH1)_R-complete	5813020673	PDL18k_pct	Roughly traced	980	1647	45	50	40	50	0	20	20	40	25	25	25	20	25	20	1	50	0.9	1	0.8	1	0	80	80	0.8	0.8	80	80	0.8	0.8	0.8	['PSD glyph placed far from PSD']	ordishc	5813020673_combined_results_mb.csv	5813020673	46	50	38	50	17	21	0.92	1	0.76	1
295482551_put_ADL20b	295482551	ADL20b_pct	Roughly traced	140	419	48	50	35	50	1	18	17	35	25	25	24	17	21	16	1	50	0.96	1	0.7	1	0.02	72	68	0.72	0.68	72	68	0.708333333	0.761904762	0.7	['Low Confidence psd']		295482551_combined_results_1000.csv	295482551	48	50	38	50	18	20	0.96	1	0.76	1
takemurasa-connection_validation-325489440_FB08f(pSM6)_R-complete	325489440	FB8D	Roughly traced	155	951	47	50	37	50	0	16	21	37	25	25	25	16	25	21	0	50	0.94	1	0.74	1	0	64	84	0.64	0.84	64	84	0.64	0.84	0.74	[]	ordishc	325489440_combined_results_cx.csv	325489440	47	50	40	50	18	22	0.94	1	0.8	1
ogundeyio-connection_validation-423382015_MBON23(a2sp)(SFS1)_R-complete	423382015	MBON23	Roughly traced	733	4467	50	50	43	50	1	19	24	43	25	25	25	19	25	24	1	50	1	1	0.86	1	0.02	76	96	0.76	0.96	76	96	0.76	0.96	0.86	['Low Confidence psd']	smithc	423382015_combined_results_mb.csv	423382015	49	50	42	50	18	24	0.98	1	0.84	1
ogundeyio-connection_validation-455155337_put_ADM11c(sgL2)_R-complete	455155337	ADM11c_pct	Roughly traced	697	1843	50	50	37	50	3	18	19	37	25	25	25	18	25	19	3	50	1	1	0.74	1	0.06	72	76	0.72	0.76	72	76	0.72	0.76	0.74	['Low Confidence psd', 'Low Confidence psd', 'Doubly annotated psd due to merge ']	rymert	455155337_combined_results_mb.csv	455155337	50	50	39	50	18	21	1	1	0.78	1
ordishc-connection_validation-543412036_put_ADL09n(LBDL10)_R-complete	543412036	ADL09y_pct	Roughly traced	114	537	47	50	40	49	0	20	20	39	25	25	25	20	25	20	0	50	0.94	1	0.8	0.98	0	80	80	0.8	0.8	80	80	0.8	0.8	0.78	[]	takemurasa	543412036_combined_results_mb_retry.csv	543412036	48	50	36	50	18	18	0.96	1	0.72	1
ogundeyio-connection_validation-550422384_put_ADM07m(aSMPB)_R-complete	550422384	ADM07k_pct	Roughly traced	758	3638	50	50	40	49	2	20	20	39	26	24	26	20	24	20	2	50	1	1	0.8	0.98	0.04	76.92307692	83.33333333	0.769230769	0.833333333	76.92307692	83.33333333	0.769230769	0.833333333	0.78	['False merge in psd', 'Low Confidence psd']	ordishc	550422384_combined_results_mb.csv	550422384	50	50	40	50	18	22	1	1	0.8	1
551303686_put_ADM07jA	551303686	ADM07oj_pct	Roughly traced	222	1445	48	49	38	50	1	16	22	37	25	25	21	15	24	22	1	50	0.96	0.98	0.76	1	0.02	64	88	0.64	0.88	64	88	0.714285714	0.916666667	0.74	['PSD on edge of cleft']		551303686_combined_results_1000.csv	551303686	47	49	40	50	18	22	0.94	0.98	0.8	1
ogundeyio-connection_validation-575081131_put_ADL24d(LBDL4)_R-complete	575081131	ADL24r_pct	Roughly traced	493	1123	48	50	33	50	3	17	16	33	25	25	25	17	25	16	3	50	0.96	1	0.66	1	0.06	68	64	0.68	0.64	68	64	0.68	0.64	0.66	['Low Confidence psd', 'Low Confidence psd', 'Low Confidence psd']	lohffa	575081131_combined_results_mb.csv	575081131	49	50	36	49	18	18	0.98	1	0.72	0.98
ogundeyio-connection_validation-604195247_(pSM2)_R-complete	604195247	PDM12b_pct	Roughly traced	75	326	47	50	35	50	2	16	19	35	25	25	25	16	25	19	2	50	0.94	1	0.7	1	0.04	64	76	0.64	0.76	64	76	0.64	0.76	0.7	['Low Confidence Tbar', 'Low confidence psd']	takemurasa	604195247_combined_results_mb_retry.csv	604195247	47	50	38	50	18	20	0.94	1	0.76	1
ogundeyio-connection_validation-644450686_put_ADM01v(SMPF)_R-complete	644450686	ADM01v_pct	Roughly traced	500	1086	50	50	35	50	2	15	20	35	25	25	25	15	25	20	2	50	1	1	0.7	1	0.04	60	80	0.6	0.8	60	80	0.6	0.8	0.7	['Low Confidence psd', 'Low Confidence psd']	ordishc	644450686_combined_results_mb.csv	644450686	50	50	37	50	18	19	1	1	0.74	1
ordishc-connection_validation-669965108_(pSM1)_R-complete	669965108	PDM08j_pct	Roughly traced	1343	2708	50	50	39	50	0	20	19	39	25	25	25	20	25	19	0	50	1	1	0.78	1	0	80	76	0.8	0.76	80	76	0.8	0.76	0.78	[]	takemurasa	669965108_combined_results_mb_retry.csv	669965108	49	50	37	50	18	19	0.98	1	0.74	1
828477488_put_ADL12j	828477488	ADL12j_pct	Roughly traced	359	666	47	50	39	50	1	18	21	39	25	25	23	18	24	21	1	50	0.94	1	0.78	1	0.02	72	84	0.72	0.84	72	84	0.782608696	0.875	0.78	['Low Confidence psd']		828477488_combined_results_1000.csv	828477488	47	50	40	50	18	22	0.94	1	0.8	1
takemurasa-connection_validation-886280616_FB09i(igL1)_R-complete	886280616	FB9B_b	Roughly traced	68	326	45	50	40	50	5	19	21	40	25	25	25	19	25	21	5	50	0.9	1	0.8	1	0.1	76	84	0.76	0.84	76	84	0.76	0.84	0.8	['Low confidence PSD', 'Low confidence PSD', 'Low confidence PSD', 'Low confidence PSD', 'Low confidence PSD']	ordishc	886280616_combined_results_cx.csv	886280616	44	50	40	50	18	22	0.88	1	0.8	1
ogundeyio-connection_validation-911911004_PB15b_R-complete	911911004	Delta7	Roughly traced	653	1493	46	50	40	50	1	18	22	40	25	25	25	18	25	22	2	50	0.92	1	0.8	1	0.02	72	88	0.72	0.88	72	88	0.72	0.88	0.8	['Low Confidence psd', 'Low Confidence psd']	ogundeyio	911911004_combined_results_cx.csv	911911004	46	50	40	50	18	22	0.92	1	0.8	1
takemurasa-connection_validation-916637896_FB_Q11_C5_R-complete	916637896	FS3B	Roughly traced	52	274	47	50	35	50	0	17	18	35	25	25	25	17	25	18	1	50	0.94	1	0.7	1	0	68	72	0.68	0.72	68	72	0.68	0.72	0.7	['Low confidence PSD']	takemurasa	916637896_combined_results_cx.csv	916637896	48	50	38	50	18	20	0.96	1	0.76	1
lohffa-connection_validation-978686129_FB_Q10a_C3_L-complete	978686129	FS2A	Roughly traced	83	856	47	45	44	49	3	20	24	39	25	25	25	20	25	24	3	50	0.94	0.9	0.88	0.98	0.06	80	96	0.8	0.96	80	96	0.8	0.96	0.78	['T-bar not valid?', 'T-bar not valid?', 'PSD not valid? ']	lohffa	978686129_combined_results_cx.csv	978686129	47	45	41	49	18	23	0.94	0.9	0.82	0.98
takemurasa-connection_validation-989228019_FB04Ba(igL1)_R-complete	989228019	FB5V	Roughly traced	322	2004	50	50	40	50	0	19	21	40	26	24	26	19	24	21	0	50	1	1	0.8	1	0	73.07692308	87.5	0.730769231	0.875	73.07692308	87.5	0.730769231	0.875	0.8	[]	lohffa	989228019_combined_results_cx.csv	989228019	50	50	41	50	18	23	1	1	0.82	1
takemurasa-connection_validation-1072455791_FB_Q12b_C3_R-complete	1072455791	FS4B	Roughly traced	89	575	48	50	39	49	0	17	22	39	25	25	25	17	25	22	3	50	0.96	1	0.78	0.98	0	68	88	0.68	0.88	68	88	0.68	0.88	0.78	['Low confidence PSD', 'Low confidence PSD', 'Split needed at (23831, 19735, 21672)']	ogundeyio	1072455791_combined_results_cx.csv	1072455791	47	50	41	49	18	23	0.94	1	0.82	0.98
lohffa-connection_validation-1081957306_LL11(ABDL)_R-complete	1081957306	CL-L(c)2	Roughly traced	532	9423	49	49	43	49	0	21	22	42	25	25	25	21	25	22	4	50	0.98	0.98	0.86	0.98	0	84	88	0.84	0.88	84	88	0.84	0.88	0.84	['low confidence PSD placement', 'low confidence PSD placement', 'low confidence PSD placement', 'low confidence PSD placement']	lohffa	1081957306_combined_results_mb.csv	1081957306	48	49	42	49	18	24	0.96	0.98	0.84	0.98
ordishc-connection_validation-1093216022_FBRUB_C2_R-complete	1093216022	FR_a	Roughly traced	210	1944	43	50	40	50	0	18	22	40	25	25	25	18	25	22	0	50	0.86	1	0.8	1	0	72	88	0.72	0.88	72	88	0.72	0.88	0.8	[]	ogundeyio	1093216022_combined_results_cx.csv	1093216022	43	50	41	50	18	23	0.86	1	0.82	1
takemurasa-connection_validation-1196573432_FB_Q7b_C2_R-complete	1196573432	FC2B	Roughly traced	215	2463	45	50	41	49	0	18	23	41	25	25	25	18	25	23	3	50	0.9	1	0.82	0.98	0	72	92	0.72	0.92	72	92	0.72	0.92	0.82	['Low confidence PSD', 'Low confidence PSD', 'Low confidence PSD']	takemurasa	1196573432_combined_results_cx.csv	1196573432	45	50	42	49	18	24	0.9	1	0.84	0.98
takemurasa-connection_validation-1261130146_FB_Q8_C9_L-complete	1261130146	FC3	Roughly traced	162	579	47	49	37	49	0	18	19	37	25	25	25	18	25	19	2	50	0.94	0.98	0.74	0.98	0	72	76	0.72	0.76	72	76	0.72	0.76	0.74	['Low confidence PSD', 'Low confidence PSD']	rymert	1261130146_combined_results_cx.csv	1261130146	47	49	39	49	18	21	0.94	0.98	0.78	0.98
takemurasa-connection_validation-1261436508_R3dD(ring)(igL2)_R-complete	1261436508	R3d_c	Traced	366	1308	44	50	39	50	2	17	22	39	24	26	24	17	26	22	2	50	0.88	1	0.78	1	0.04	70.83333333	84.61538462	0.708333333	0.846153846	70.83333333	84.61538462	0.708333333	0.846153846	0.78	['Low conifidence Tbar', 'Self synapse. Cannot find a FN so far.']	lohffa	1261436508_combined_results_cx.csv	1261436508	44	50	39	50	18	21	0.88	1	0.78	1
ordishc-connection_validation-1418618235_SIFamide(pFBB1)-complete	1418618235	SIFamide	Traced	931	1570	47	50	35	50	0	19	16	35	25	25	25	19	25	16	0	50	0.94	1	0.7	1	0	76	64	0.76	0.64	76	64	0.76	0.64	0.7	[]	lohffa	1418618235_combined_results_mb_retry.csv	1418618235	46	50	36	50	18	18	0.92	1	0.72	1
ordishc-connection_validation-1448575109_LALNO2a(aVT1)_R_ipsi-complete	1448575109	LN1	Traced	939	8561	48	49	43	50	0	18	25	42	25	25	25	18	25	25	0	50	0.96	0.98	0.86	1	0	72	100	0.72	1	72	100	0.72	1	0.84	[]	rymert	1448575109_combined_results_cx.csv	1448575109	47	48	43	49	18	25	0.94	0.96	0.86	0.98
ogundeyio-connection_validation-1509275719_put_ADM05b(mAOTU2)_R-complete	1509275719	ADM05b_pct	Roughly traced	164	429	50	50	36	50	0	16	20	36	25	25	25	16	25	20	0	50	1	1	0.72	1	0	64	80	0.64	0.8	64	80	0.64	0.8	0.72	[]	rymert	1509275719_combined_results_mb_retry.csv	1509275719	50	50	40	49	18	22	1	1	0.8	0.98
ordishc-connection_validation-5813021576_put_ADL16c(LBDL8)_R-complete	5813021576	ADL16c_pct	Roughly traced	274	470	47	50	37	50	0	18	19	37	25	25	25	18	25	19	0	50	0.94	1	0.74	1	0	72	76	0.72	0.76	72	76	0.72	0.76	0.74	[]	ordishc	5813021576_combined_results_mb_retry.csv	5813021576	46	50	39	50	18	21	0.92	1	0.78	1
ogundeyio-connection_validation-5813049445_FB_Q7a_C1_R-complete	5813049445	FC2A	Roughly traced	237	2128	48	50	42	50	3	19	23	42	25	25	25	19	25	23	2	50	0.96	1	0.84	1	0.06	76	92	0.76	0.92	76	92	0.76	0.92	0.84	['Low Confidence psd', 'Low Confidence psd']	rymert	5813049445_combined_results_cx.csv	5813049445	46	50	39	50	18	21	0.92	1	0.78	1
ogundeyio-connection_validation-5813069498_FB08i(pSM6)_R-complete	5813069498	FB8F_b	Roughly traced	182	1294	48	50	40	50	5	18	22	40	25	25	25	18	25	22	5	50	0.96	1	0.8	1	0.1	72	88	0.72	0.88	72	88	0.72	0.88	0.8	['Low Confidence psd', 'Low Confidence psd', 'Low Confidence psd', 'Low Confidence psd', 'Low Confidence psd']	lohffa	5813069498_combined_results_cx.csv	5813069498	48	50	40	50	18	22	0.96	1	0.8	1
rymert-connection_validation-5813083780_(iPB2)_R-complete	5813083780	PDM09m_pct	Roughly traced	2674	6143	46	50	44	48	2	20	24	41	25	25	25	20	25	24	3	50	0.92	1	0.88	0.96	0.04	80	96	0.8	0.96	80	96	0.8	0.96	0.82	['Unsure if PSD is in cleft', 'PSD needs split', 'Unsure if Tbar or PSD']	takemurasa	5813083780_combined_results_mb_retry.csv	5813083780	44	50	42	48	18	24	0.88	1	0.84	0.96
ordishc-connection_validation-202916528_FBQ12b_C4_R-complete	202916528	FS4B	Roughly traced	95	431	50	50	40	50	0	17	23	40	25	25	25	17	25	23	0	50	1	1	0.8	1	0	68	92	0.68	0.92	68	92	0.68	0.92	0.8	[]	lohffa	202916528_combined_results_cx.csv	202916528	49	50	43	50	19	24	0.98	1	0.86	1
takemurasa-connection_validation-326253554_(pSM2)_R-complete	326253554	PDM12i_pct	Roughly traced	2613	9709	49	50	41	50	0	20	21	41	25	25	25	20	25	21	1	50	0.98	1	0.82	1	0	80	84	0.8	0.84	80	84	0.8	0.84	0.82	['Low confident Tbar and PSD']	ordishc	326253554_combined_results_mb.csv	326253554	48	49	39	49	19	20	0.96	0.98	0.78	0.98
327596481_put_ADL16m	327596481	ADL16m_pct	Roughly traced	162	510	49	50	37	50	3	18	19	37	25	25	22	17	21	17	3	50	0.98	1	0.74	1	0.06	72	76	0.72	0.76	72	76	0.772727273	0.80952381	0.74	['Low Confidence psd', 'Low Confidence psd', 'Low Confidence psd']		327596481_combined_results_1000.csv	327596481	49	50	38	50	19	19	0.98	1	0.76	1
ordishc-connection_validation-328909309_(pSM2)_R-complete	328909309	PDM12d_pct	Roughly traced	132	354	48	50	39	50	0	21	18	39	25	25	25	21	25	18	0	50	0.96	1	0.78	1	0	84	72	0.84	0.72	84	72	0.84	0.72	0.78	[]	ordishc	328909309_combined_results_mb_retry.csv	328909309	47	50	39	50	19	20	0.94	1	0.78	1
smithc-connection_validation-356844539_(pSM2)_R-complete	356844539	PDM12op_pct	Roughly traced	47	279	48	50	35	50	2	19	16	34	25	25	25	19	25	16	2	50	0.96	1	0.7	1	0.04	76	64	0.76	0.64	76	64	0.76	0.64	0.68	['T-bar glyph is on a PSD', "T-bar glyph is on another body's PSD, but the marked PSD does synapse with the intended body at another T-bar"]	rymert	356844539_combined_results_mb_retry.csv	356844539	47	50	38	50	19	19	0.94	1	0.76	1
takemurasa-connection_validation-359637824_FB06y(pSM6)_R-complete	359637824	FB6T	Roughly traced	209	1261	48	50	36	50	0	18	18	36	25	25	25	18	25	18	1	50	0.96	1	0.72	1	0	72	72	0.72	0.72	72	72	0.72	0.72	0.72	['Low confidence PSD']	takemurasa	359637824_combined_results_cx.csv	359637824	48	50	36	50	19	17	0.96	1	0.72	1
387227028_put_PDM10p	387227028	PDM10p_pct	Roughly traced	223	480	50	50	36	49	2	17	19	35	25	25	22	17	22	17	2	50	1	1	0.72	0.98	0.04	68	76	0.68	0.76	68	76	0.772727273	0.772727273	0.7	['Low Confidence psd', 'Low Confidence psd']		387227028_combined_results_1000.csv	387227028	50	50	39	49	19	20	1	1	0.78	0.98
ogundeyio-connection_validation-392325540_put_ADL02j(hLHT1)_R-complete	392325540	ADL02oq_pct	Roughly traced	183	683	50	50	35	50	2	18	17	35	25	25	25	18	25	17	2	50	1	1	0.7	1	0.04	72	68	0.72	0.68	72	68	0.72	0.68	0.7	['Low Confidence psd', 'Low Confidence psd']	lohffa	392325540_combined_results_mb_retry.csv	392325540	50	50	38	50	19	19	1	1	0.76	1
rymert-connection_validation-455815977_put_ADM07oi(aSMPB)_L-complete	455815977	ADM07a_c_pct	Roughly traced	178	1355	48	50	43	50	0	20	23	43	25	25	25	20	25	23	0	50	0.96	1	0.86	1	0	80	92	0.8	0.92	80	92	0.8	0.92	0.86	[]	ordishc	455815977_combined_results_mb_retry.csv	455815977	48	50	41	50	19	22	0.96	1	0.82	1
ogundeyio-connection_validation-576825965_OA_VUMa7_R-complete	576825965	OA-VUMa7	Traced	5185	4836	49	50	32	50	2	20	12	32	25	25	25	20	25	12	2	50	0.98	1	0.64	1	0.04	80	48	0.8	0.48	80	48	0.8	0.48	0.64	['Low Confidence psd', 'Low Confidence psd']	ordishc	576825965_combined_results_mb.csv	576825965	48	50	34	50	19	15	0.96	1	0.68	1
ogundeyio-connection_validation-579596940_put_ADL14b(dAOTU2)_R-complete	579596940	ADL14b_pct	Roughly traced	229	738	50	50	40	50	1	18	22	40	25	25	25	18	25	22	2	50	1	1	0.8	1	0.02	72	88	0.72	0.88	72	88	0.72	0.88	0.8	['Low Confidence psd', 'Low Confidence psd']	lohffa	579596940_combined_results_mb.csv	579596940	50	50	37	50	19	18	1	1	0.74	1
ordishc-connection_validation-610274029_mlPN3(A14)_R-complete	610274029	olfactory multi vPN mlALT	Roughly traced	754	5673	49	50	39	49	0	20	19	39	25	25	25	20	25	19	0	50	0.98	1	0.78	0.98	0	80	76	0.8	0.76	80	76	0.8	0.76	0.78	[]	takemurasa	610274029_combined_results_mb_retry.csv	610274029	48	50	40	49	19	21	0.96	1	0.8	0.98
ogundeyio-connection_validation-639585968_put_ADM02c(aSMP)_R.json-complete	639585968	ADM02c_pct	Roughly traced	1881	3449	47	50	38	50	3	19	19	38	26	24	26	19	24	19	3	50	0.94	1	0.76	1	0.06	73.07692308	79.16666667	0.730769231	0.791666667	73.07692308	79.16666667	0.730769231	0.791666667	0.76	['Low Confidence psd', 'Low Confidence psd', 'Low Confidence psd']	lohffa	639585968_combined_results_mb.csv	639585968	47	50	42	50	19	23	0.94	1	0.84	1
lohffa-connection_validation-665169278_(PYF)_R-complete	665169278	PDL17n_pct	Roughly traced	581	1073	47	49	44	48	4	22	22	43	25	25	25	22	25	22	6	50	0.94	0.98	0.88	0.96	0.08	88	88	0.88	0.88	88	88	0.88	0.88	0.86	['low confidence PSD placement', 'PSD not valid?', 'PSD not valid?', 'PSD not valid?', 'low confidence PSD placement', 'Difficult to distinguish which body the T-bar is placed on. T-bar correct on body ID 604460198']	ordishc	665169278_combined_results_mb_retry.csv	665169278	46	49	39	48	19	20	0.92	0.98	0.78	0.96
ogundeyio-connection_validation-672352543_MBON10(B'1)(igL2)_R_002-complete	672352543	MBON10	Roughly traced	214	1309	50	50	37	50	1	17	20	37	25	25	25	17	25	20	1	50	1	1	0.74	1	0.02	68	80	0.68	0.8	68	80	0.68	0.8	0.74	['Low Confidence psd']	takemurasa	672352543_combined_results_mb_retry.csv	672352543	50	50	41	50	19	22	1	1	0.82	1
ordishc-connection_validation-675822802_put_ADM01x(SMPF)_R-complete	675822802	ADM01ou_pct	Roughly traced	392	900	48	50	39	49	0	22	17	38	25	25	25	22	25	17	0	50	0.96	1	0.78	0.98	0	88	68	0.88	0.68	88	68	0.88	0.68	0.76	[]	takemurasa	675822802_combined_results_mb_retry.csv	675822802	47	50	38	50	19	19	0.94	1	0.76	1
698970725_put_PDL20s	698970725	PDL20s_pct	Roughly traced	614	1280	50	50	43	50	0	20	23	43	25	25	23	19	25	23	0	50	1	1	0.86	1	0	80	92	0.8	0.92	80	92	0.826086957	0.92	0.86	[]		698970725_combined_results_1000.csv	698970725	50	50	43	50	19	24	1	1	0.86	1
ogundeyio-connection_validation-728912816_put_ADL28e(aSIP2)_R-complete	728912816	ADL28e_pct	Roughly traced	319	855	49	50	42	50	2	19	23	42	25	25	25	19	25	23	2	50	0.98	1	0.84	1	0.04	76	92	0.76	0.92	76	92	0.76	0.92	0.84	['Low Confidence psd', 'Low Confidence psd']	ordishc	728912816_combined_results_mb.csv	728912816	49	50	42	50	19	23	0.98	1	0.84	1
takemurasa-connection_validation-764800337_FB_Q10c_C3_L-complete	764800337	FS2B	Roughly traced	87	1013	47	50	38	50	0	17	21	38	25	25	25	17	25	21	7	50	0.94	1	0.76	1	0	68	84	0.68	0.84	68	84	0.68	0.84	0.76	['Low confidence PSD', 'Low confidence Tar', 'Low confidence PSD', 'Low confidence Tbar', 'Low confidence PSD', 'PSD should belong to the neighbor Tbar (23125, 23171, 17076)', 'Low confidence PSD']	lohffa	764800337_combined_results_cx.csv	764800337	47	50	40	49	19	21	0.94	1	0.8	0.98
smithc-connection_validation-769263962_put_PDM12m(pSM2)_R-complete	769263962	PDM12m_pct	Roughly traced	898	3807	46	50	39	50	1	18	21	39	25	25	25	18	25	21	5	50	0.92	1	0.78	1	0.02	72	84	0.72	0.84	72	84	0.72	0.84	0.78	['T-bar glyph is not on a valid T-bar', 'T-bar glyph is on a PSD', 'T-bar glyph seems to be on a PSD', 'T-bar glyph is not on a real T-bar', 'PSD glyph is on the same body as the T-bar']	takemurasa	769263962_combined_results_mb_retry.csv	769263962	46	50	41	50	19	22	0.92	1	0.82	1
ordishc-connection_validation-823063281_(aPBB)_R-complete	823063281	PDM28q_pct	Roughly traced	1006	3472	48	50	37	50	0	17	20	37	25	25	25	17	25	20	0	50	0.96	1	0.74	1	0	68	80	0.68	0.8	68	80	0.68	0.8	0.74	[]	ordishc	823063281_combined_results_mb_retry.csv	823063281	48	50	39	50	19	20	0.96	1	0.78	1
smithc-connection_validation-853078844_put_AVL03u(hVLPF1)_R-complete	853078844	AVL03lb_pct	Roughly traced	411	1328	46	50	35	50	1	17	18	35	25	25	25	17	25	18	4	50	0.92	1	0.7	1	0.02	68	72	0.68	0.72	68	72	0.68	0.72	0.7	['T-bar glyph is not on a valid T-bar', 'T-bar glyph is not on a valid T-bar', 'T-bar glyph is not on a valid T-bar', 'Not sure T-bar glyph is on a valid T-bar']	lohffa	853078844_combined_results_mb_retry.csv	853078844	46	50	37	50	19	18	0.92	1	0.74	1
ogundeyio-connection_validation-854883067_put_ADM05k(mAOTU2)_R-complete	854883067	ADM05n_pct	Roughly traced	208	611	49	50	38	50	3	19	19	38	25	25	25	19	25	19	3	50	0.98	1	0.76	1	0.06	76	76	0.76	0.76	76	76	0.76	0.76	0.76	['Low Confidence psd', 'Low Confidence psd', 'Low Confidence psd']	rymert	854883067_combined_results_mb.csv	854883067	49	50	39	50	19	20	0.98	1	0.78	1
ogundeyio-connection_validation-861665641_MBON12(y2a'1)(MBDLaxon1)_R_001-complete	861665641	MBON12	Roughly traced	1156	8756	47	50	41	50	4	17	24	41	25	25	25	17	25	24	4	50	0.94	1	0.82	1	0.08	68	96	0.68	0.96	68	96	0.68	0.96	0.82	['Low Confidence psd', 'Low Confidence psd', 'Autapse, possible false merge', 'Low Confidence psd']	lohffa	861665641_combined_results_mb_retry.csv	861665641	48	50	43	50	19	24	0.96	1	0.86	1
ordishc-connection_validation-883415238_(PLBDL1)_R-complete	883415238	PVL01c_pct	Roughly traced	204	434	46	50	38	50	0	19	19	38	25	25	25	19	25	19	0	50	0.92	1	0.76	1	0	76	76	0.76	0.76	76	76	0.76	0.76	0.76	[]	takemurasa	883415238_combined_results_mb_retry.csv	883415238	46	50	37	50	19	18	0.92	1	0.74	1
ogundeyio-connection_validation-894702888_put_ADM03j(mAOTU1)_R-complete	894702888	ADM03om_pct	Traced	931	2078	50	50	34	50	3	17	17	34	25	25	25	17	25	17	3	50	1	1	0.68	1	0.06	68	68	0.68	0.68	68	68	0.68	0.68	0.68	['Very Low Confidence psd', 'Low Confidence psd', 'Low Confidence psd']	lohffa	894702888_combined_results_mb.csv	894702888	50	50	39	50	19	20	1	1	0.78	1
ordishc-connection_validation-948704521_FBQ12a_C7_R-complete	948704521	FS4A	Roughly traced	53	339	50	50	41	50	0	18	23	41	25	25	25	18	25	23	0	50	1	1	0.82	1	0	72	92	0.72	0.92	72	92	0.72	0.92	0.82	[]	takemurasa	948704521_combined_results_cx.csv	948704521	46	50	42	50	19	23	0.92	1	0.84	1
ordishc-connection_validation-951808062_FBQ9_C6_R-complete	951808062	FS1C	Roughly traced	102	921	48	50	35	49	0	18	17	35	25	25	25	18	25	17	0	50	0.96	1	0.7	0.98	0	72	68	0.72	0.68	72	68	0.72	0.68	0.7	[]	takemurasa	951808062_combined_results_cx.csv	951808062	47	49	38	50	19	19	0.94	0.98	0.76	1
takemurasa-connection_validation-979368408_FB_Q11_C4_R-complete	979368408	FS3B	Roughly traced	66	544	48	50	40	50	0	18	22	40	25	25	25	18	25	22	5	50	0.96	1	0.8	1	0	72	88	0.72	0.88	72	88	0.72	0.88	0.8	['Low confidence PSD', 'Low confidence PSD', 'Low confidence PSD', 'Low confidence PSD', 'Low confidence Tbar and PSD']	takemurasa	979368408_combined_results_cx.csv	979368408	48	50	41	50	19	22	0.96	1	0.82	1
takemurasa-connection_validation-1009375310_FB0107(aVT1)_R-complete	1009375310	FB7H	Roughly traced	436	2133	49	50	39	50	0	18	21	39	25	25	25	18	25	21	1	50	0.98	1	0.78	1	0	72	84	0.72	0.84	72	84	0.72	0.84	0.78	['Low confidence PSD']	smithc	1009375310_combined_results_cx.csv	1009375310	49	50	38	50	19	19	0.98	1	0.76	1
1011685011_put_PVL06j	1011685011	PVL06j_pct	Roughly traced	156	300	49	50	34	49	0	17	17	34	25	25	23	17	24	17	1	50	0.98	1	0.68	0.98	0	68	68	0.68	0.68	68	68	0.739130435	0.708333333	0.68	['Autapse']		1011685011_combined_results_1000.csv	1011685011	49	50	36	50	19	17	0.98	1	0.72	1
rymert-connection_validation-1016192580_FB04od(igL1)_R-complete	1016192580	FB4O	Roughly traced	613	1516	49	50	40	49	2	19	21	40	25	25	25	19	25	21	2	50	0.98	1	0.8	0.98	0.04	76	84	0.76	0.84	76	84	0.76	0.84	0.8	['PSD on edge of cleft', 'Unsure if T-bar. Lack of cleft.']	ogundeyio	1016192580_combined_results_cx.csv	1016192580	49	50	42	49	19	23	0.98	1	0.84	0.98
takemurasa-connection_validation-1072533980_FB_Q11_C7_L-complete	1072533980	FS3B	Roughly traced	57	390	47	50	39	49	0	18	21	39	25	25	25	18	25	21	4	50	0.94	1	0.78	0.98	0	72	84	0.72	0.84	72	84	0.72	0.84	0.78	['Low confidence PSD', 'Low confidence PSD', 'Split needed at (18496, 25602, 10882). It is on HK and not clear anyway.', 'Low confidence PSD']	ordishc	1072533980_combined_results_cx.csv	1072533980	47	50	41	49	19	22	0.94	1	0.82	0.98
takemurasa-connection_validation-1131822592_FB04j(aVT1)_R-complete	1131822592	FB4I	Roughly traced	335	1866	48	50	38	49	0	20	18	37	26	24	26	20	24	18	2	50	0.96	1	0.76	0.98	0	76.92307692	75	0.769230769	0.75	76.92307692	75	0.769230769	0.75	0.74	['Low confidence PSD', 'Low confidence PSD']	lohffa	1131822592_combined_results_cx.csv	1131822592	48	50	39	49	19	20	0.96	1	0.78	0.98
lohffa-connection_validation-1132168481_FB04ob(igL1)_L-complete	1132168481	FB4Q_b	Roughly traced	421	1254	50	49	40	49	1	19	21	38	25	25	25	19	25	21	3	50	1	0.98	0.8	0.98	0.02	76	84	0.76	0.84	76	84	0.76	0.84	0.76	['low confidence PSD placement', 'PSD not valid?', 'low confidence PSD placement']	ogundeyio	1132168481_combined_results_cx.csv	1132168481	50	49	41	49	19	22	1	0.98	0.82	0.98
ordishc-connection_validation-1200942398_put_AVM09h(LALT1)_R-complete	1200942398	AVM09od_pct	Roughly traced	113	664	47	50	41	50	0	19	22	41	25	25	25	19	25	22	0	50	0.94	1	0.82	1	0	76	88	0.76	0.88	76	88	0.76	0.88	0.82	[]	ordishc	1200942398_combined_results_mb_retry.csv	1200942398	46	50	42	50	19	23	0.92	1	0.84	1
lohffa-connection_validation-1228692168_ExR4(ring)_L_001-complete	1228692168	ExR6	Roughly traced	1807	4019	49	48	40	47	7	21	19	35	25	25	25	21	25	19	7	50	0.98	0.96	0.8	0.94	0.14	84	76	0.84	0.76	84	76	0.84	0.76	0.7	['PSD not valid?', 'PSD not valid?', 'PSD not valid?', 'PSD not valid?', 'PSD not valid?', '1-If it is a T-bar 2) PSD not valid even if it is a T-bar', 'PSD not valid?']	lohffa	1228692168_combined_results_cx.csv	1228692168	48	48	37	48	19	18	0.96	0.96	0.74	0.96
smithc-connection_validation-1230328538_FB_Q12a(AB)_C1_R-complete	1230328538	FS4A	Roughly traced	74	251	46	49	42	49	3	19	23	41	25	25	25	19	25	23	4	50	0.92	0.98	0.84	0.98	0.06	76	92	0.76	0.92	76	92	0.76	0.92	0.82	['Not sure that the T-bar glyph is on a valid T-bar', 'T-bar glyph is on a PSD(?), not a valid T-bar', 'Not sure the T-bar glyph is on a valid T-bar', 'Not sure the T-bar glyph is on a valid T-bar']	lohffa	1230328538_combined_results_cx.csv	1230328538	43	49	42	49	19	23	0.86	0.98	0.84	0.98
takemurasa-connection_validation-1259718093_ExR8(ring_bday)_R-complete	1259718093	ExR8	Traced	475	1867	42	48	38	49	3	17	21	38	25	25	25	17	25	21	6	50	0.84	0.96	0.76	0.98	0.06	68	84	0.68	0.84	68	84	0.68	0.84	0.76	['Tbar should be on 697001770. The body 1259718093 needs split. ', 'Tbar should be on 697001770. The body 1259718093 needs split. ', 'Low confidence Tbar', 'Tbar and PSD glyphs are on a HK stitch', 'Low confidence Tbar and PSD', 'Low confidence PSD']	lohffa	1259718093_combined_results_cx_remakes.csv	1259718093	46	50	40	50	19	21	0.92	1	0.8	1
ogundeyio-connection_validation-1261768644_R3aB(ring)(igL2)_R-complete	1261768644	R3a_b	Traced	277	995	50	50	41	50	1	20	21	41	25	25	25	20	25	21	2	50	1	1	0.82	1	0.02	80	84	0.8	0.84	80	84	0.8	0.84	0.82	['Low Confidence psd', 'Low Confidence psd']	ordishc	1261768644_combined_results_cx.csv	1261768644	49	49	42	50	19	23	0.98	0.98	0.84	1
takemurasa-connection_validation-1310822912_Delta12c_R-complete	1310822912	Delta0E	Roughly traced	119	1028	49	50	37	50	0	17	20	37	25	25	25	17	25	20	1	50	0.98	1	0.74	1	0	68	80	0.68	0.8	68	80	0.68	0.8	0.74	['PSD location is too far from Tbar, but the body should have PSD.']	smithc	1310822912_combined_results_cx.csv	1310822912	49	50	39	50	19	20	0.98	1	0.78	1
ogundeyio-connection_validation-1415182325_Delta12g_L-complete	1415182325	Delta0K	Roughly traced	77	520	48	49	39	49	0	18	21	39	25	25	25	18	25	21	0	50	0.96	0.98	0.78	0.98	0	72	84	0.72	0.84	72	84	0.72	0.84	0.78	[]	smithc	1415182325_combined_results_cx.csv	1415182325	48	49	41	49	19	22	0.96	0.98	0.82	0.98
rymert-connection_validation-5812980079_put_ADM07ok(aSMPB)_R-complete	5812980079	ADM07q_pct	Roughly traced	542	1786	50	50	43	50	0	21	22	43	25	25	25	21	25	22	0	50	1	1	0.86	1	0	84	88	0.84	0.88	84	88	0.84	0.88	0.86	[]	smithc	5812980079_combined_results_mb_retry.csv	5812980079	49	50	42	50	19	23	0.98	1	0.84	1
smithc-connection_validation-5812980507_(lATL)_R-complete	5812980507	PDM21b_pct	Roughly traced	726	917	47	50	33	49	2	18	15	32	25	25	25	18	25	15	3	50	0.94	1	0.66	0.98	0.04	72	60	0.72	0.6	72	60	0.72	0.6	0.64	['T-bar glyph is not on a real T-bar', 'Not sure T-bar glyph is on a valid T-bar', 'Not sure T-bar glyph is on a valid T-bar']	lohffa	5812980507_combined_results_mb_retry.csv	5812980507	48	50	33	50	19	14	0.96	1	0.66	1
ogundeyio-connection_validation-5812981460_aMe8(AVF6)_R-complete	5812981460	aMe8	Roughly traced	509	1193	50	50	41	49	5	20	21	41	24	26	24	20	26	21	5	50	1	1	0.82	0.98	0.1	83.33333333	80.76923077	0.833333333	0.807692308	83.33333333	80.76923077	0.833333333	0.807692308	0.82	['Low Confidence psd', 'Autapse', 'Very Low Confidence psd', 'Low Confidence psd', 'Low Confidence psd']	lohffa	5812981460_combined_results_mb_retry.csv	5812981460	50	50	39	50	19	20	1	1	0.78	1
ogundeyio-connection_validation-5812983831_AVLP_CRE(LEF)_R-complete	5812983831	PVL15ola_pct	Roughly traced	1310	6005	49	50	40	49	3	18	22	39	25	25	25	18	25	22	3	50	0.98	1	0.8	0.98	0.06	72	88	0.72	0.88	72	88	0.72	0.88	0.78	['Low Confidence psd', 'Low Confidence psd', 'Split needs to occur in the psd (at the split todo) to separate the two bodies']	ordishc	5812983831_combined_results_mb_retry.csv	5812983831	49	50	42	50	19	23	0.98	1	0.84	1
ogundeyio-connection_validation-5812988569_LC9-complete	5812988569	LC9	Roughly traced	136	423	48	50	36	50	6	18	18	36	25	25	25	18	25	18	8	50	0.96	1	0.72	1	0.12	72	72	0.72	0.72	72	72	0.72	0.72	0.72	['Very Low Confidence psd', 'Low Confidence psd', 'Low Confidence psd', 'Low Confidence psd', 'Low Confidence psd', 'Low Confidence psd', 'Low Confidence psd', 'Low Confidence Tbar']	ordishc	5812988569_combined_results_mb_retry.csv	5812988569	48	50	40	50	19	21	0.96	1	0.8	1
lohffa-connection_validation-5813040123_(pSM2)_R-complete	5813040123	PDM12e_pct	Roughly traced	240	830	48	50	41	50	3	20	21	41	25	25	25	20	25	21	6	50	0.96	1	0.82	1	0.06	80	84	0.8	0.84	80	84	0.8	0.84	0.82	['T-bar not valid?', 'T-bar not valid?', 'low confidence PSD placement', 'T-bar and PSD not valid?', 'low confidence PSD placement', 'low confidence PSD placement']	lohffa	5813040123_combined_results_mb_retry.csv	5813040123	48	50	43	49	19	24	0.96	1	0.86	0.98
lohffa-connection_validation-5813047685_(pLH10)_R-complete	5813047685	PDL23a_pct	Roughly traced	689	758	47	50	42	49	3	19	23	41	25	25	25	19	25	23	6	50	0.94	1	0.84	0.98	0.06	76	92	0.76	0.92	76	92	0.76	0.92	0.82	['PSD segmentation distorted a bit from the hotknife', 'low confidence PSD placement', 'PSD not valid?', 'low confidence PSD placement', 'T-bar and PSD not valid?', 'PSD not valid?']	ordishc	5813047685_combined_results_mb_retry.csv	5813047685	48	50	42	49	19	23	0.96	1	0.84	0.98
ogundeyio-connection_validation-295136965_FB01e(SFS1)_R-complete	295136965	FB1E_b	Roughly traced	334	877	45	50	39	50	5	20	19	39	25	25	25	20	25	19	4	50	0.9	1	0.78	1	0.1	80	76	0.8	0.76	80	76	0.8	0.76	0.78	['Low Confidence psd', 'Low Confidence psd', 'Low Confidence psd', 'Low Confidence psd']	rymert	295136965_combined_results_cx.csv	295136965	45	50	39	50	20	19	0.9	1	0.78	1
takemurasa-connection_validation-296531421_FB_Q12b_C9_L-complete	296531421	FS4B	Roughly traced	98	368	46	50	39	50	0	18	21	39	25	25	25	18	25	21	3	50	0.92	1	0.78	1	0	72	84	0.72	0.84	72	84	0.72	0.84	0.78	['Low confidence PSD', 'Low confidence PSD', 'Low confidence Tbar']	lohffa	296531421_combined_results_cx.csv	296531421	47	50	43	50	20	23	0.94	1	0.86	1
ordishc-connection_validation-298258399_(PLPF3)_R-complete	298258399	PVL06b_pct	Roughly traced	1121	3334	48	50	42	50	0	22	20	42	25	25	25	22	25	20	0	50	0.96	1	0.84	1	0	88	80	0.88	0.8	88	80	0.88	0.8	0.84	[]	lohffa	298258399_combined_results_mb.csv	298258399	49	50	41	49	20	21	0.98	1	0.82	0.98
rymert-connection_validation-299613480_PAM09(B1ped)(aSMP)_R-complete	299613480	PAM09	Traced	338	1850	49	50	40	50	0	19	21	40	25	25	25	19	25	21	0	50	0.98	1	0.8	1	0	76	84	0.76	0.84	76	84	0.76	0.84	0.8	[]	ordishc	299613480_combined_results_mb_retry.csv	299613480	48	50	42	50	20	22	0.96	1	0.84	1
ogundeyio-connection_validation-328930845_FB07f(pSM6)_R-complete	328930845	FB8F_a	Roughly traced	182	882	50	50	40	50	4	21	19	40	25	25	25	21	25	19	6	50	1	1	0.8	1	0.08	84	76	0.84	0.76	84	76	0.84	0.76	0.8	['Low Confidence psd', 'Low Confidence psd', 'Low Confidence psd', 'Low confidence psd', 'Low Confidence psd', 'Low Confidence psd']	ogundeyio	328930845_combined_results_cx.csv	328930845	50	50	38	49	20	18	1	1	0.76	0.98
ogundeyio-connection_validation-330661573_FB06x(pSM6)_R-complete	330661573	FB6S	Roughly traced	175	891	50	50	41	50	1	20	21	41	25	25	25	20	25	21	5	50	1	1	0.82	1	0.02	80	84	0.8	0.84	80	84	0.8	0.84	0.82	['Low Confidence psd', 'Low Confidence psd', 'Low Confidence psd', 'Low Confidence psd', 'Low Confidence psd']	lohffa	330661573_combined_results_cx.csv	330661573	50	50	43	50	20	23	1	1	0.86	1
360759031_put_ADM04od	360759031	ADM04od_pct	Roughly traced	109	737	50	50	40	50	3	18	22	40	25	25	22	17	23	21	3	50	1	1	0.8	1	0.06	72	88	0.72	0.88	72	88	0.772727273	0.913043478	0.8	['Low Confidence psd', 'Low Confidence psd', 'Low Confidence psd']		360759031_combined_results_1000.csv	360759031	50	50	43	50	20	23	1	1	0.86	1
ordishc-connection_validation-361968122_put_ADL12t(dAOTU1)_R-complete	361968122	ADL12t_pct	Roughly traced	478	760	48	50	40	50	0	21	19	40	25	25	25	21	25	19	0	50	0.96	1	0.8	1	0	84	76	0.84	0.76	84	76	0.84	0.76	0.8	[]	ogundeyio	361968122_combined_results_mb_retry.csv	361968122	47	50	39	50	20	19	0.94	1	0.78	1
390254536_put_ADL04f	390254536	ADL04f_pct	Roughly traced	137	187	45	49	43	49	1	20	23	42	25	25	23	18	23	22	1	50	0.9	0.98	0.86	0.98	0.02	80	92	0.8	0.92	80	92	0.782608696	0.956521739	0.84	['Unsure if T-bar']		390254536_combined_results_1000.csv	390254536	45	49	44	49	20	24	0.9	0.98	0.88	0.98
ogundeyio-connection_validation-393766777_PPL101(y1pedc)(SFS1)_R-complete	393766777	PPL101	Roughly traced	2197	16256	50	50	40	50	1	17	23	40	25	25	25	17	25	23	1	50	1	1	0.8	1	0.02	68	92	0.68	0.92	68	92	0.68	0.92	0.8	['Low Confidence psd']	lohffa	393766777_combined_results_mb_retry.csv	393766777	50	50	43	50	20	23	1	1	0.86	1
ordishc-connection_validation-423770604_FB05i(SFS1)_R-complete	423770604	FB5I	Roughly traced	1230	4794	48	49	39	50	0	19	20	37	25	25	25	19	25	20	0	50	0.96	0.98	0.78	1	0	76	80	0.76	0.8	76	80	0.76	0.8	0.74	[]	takemurasa	423770604_combined_results_cx.csv	423770604	48	49	41	50	20	21	0.96	0.98	0.82	1
425143700_put_ADM04nA	425143700	ADM04n_c_pct	Roughly traced	108	470	50	50	36	50	0	18	18	36	25	25	23	18	24	18	0	50	1	1	0.72	1	0	72	72	0.72	0.72	72	72	0.782608696	0.75	0.72	[]		425143700_combined_results_1000.csv	425143700	50	50	38	50	20	18	1	1	0.76	1
ordishc-connection_validation-452742028_(pSM2)_R-complete	452742028	PDM12k_pct	Roughly traced	158	3330	48	50	43	50	0	20	23	43	25	25	25	20	25	23	0	50	0.96	1	0.86	1	0	80	92	0.8	0.92	80	92	0.8	0.92	0.86	[]	ordishc	452742028_combined_results_mb.csv	452742028	48	50	43	50	20	23	0.96	1	0.86	1
takemurasa-connection_validation-454939928_FB06w(pSM6)_L-complete	454939928	FB6Y	Roughly traced	215	651	50	50	42	50	2	21	21	42	25	25	25	21	25	21	2	50	1	1	0.84	1	0.04	84	84	0.84	0.84	84	84	0.84	0.84	0.84	['Low confidence PSD', 'Low confidence PSD']	lohffa	454939928_combined_results_cx.csv	454939928	50	50	43	50	20	23	1	1	0.86	1
takemurasa-connection_validation-486842208_FB05c(igL1)_R-complete	486842208	FB5C	Roughly traced	533	2509	47	50	39	50	0	19	20	39	25	25	25	19	25	20	4	50	0.94	1	0.78	1	0	76	80	0.76	0.8	76	80	0.76	0.8	0.78	['Low confidence PSD', 'Low confidence PSD', 'Low confidence Tbar and PSD', 'Low confidence PSD']	rymert	486842208_combined_results_cx.csv	486842208	48	50	39	50	20	19	0.96	1	0.78	1
lohffa-connection_validation-487143497_MBON24(B2y5)(SFS1)_R-complete	487143497	MBON24	Roughly traced	723	8248	48	50	42	50	1	18	24	42	25	25	25	18	25	24	2	50	0.96	1	0.84	1	0.02	72	96	0.72	0.96	72	96	0.72	0.96	0.84	['low confidence PSD placement', 'PSD not valid?']	lohffa	487143497_combined_results_mb.csv	487143497	48	50	44	50	20	24	0.96	1	0.88	1
ordishc-connection_validation-487187476_put_PDM22a(iPB7)_R-complete	487187476	PDM22a_pct	Roughly traced	3443	10635	49	50	41	50	0	20	21	41	25	25	25	20	25	21	0	50	0.98	1	0.82	1	0	80	84	0.8	0.84	80	84	0.8	0.84	0.82	[]	takemurasa	487187476_combined_results_mb_retry.csv	487187476	47	50	41	50	20	21	0.94	1	0.82	1
ogundeyio-connection_validation-549261610_put_ADM07h(aSMPB)_L-complete	549261610	ADM07j_b_pct	Roughly traced	264	1497	50	50	43	50	0	20	23	43	25	25	25	20	25	23	0	50	1	1	0.86	1	0	80	92	0.8	0.92	80	92	0.8	0.92	0.86	[]	lohffa	549261610_combined_results_mb.csv	549261610	50	50	42	50	20	22	1	1	0.84	1
takemurasa-connection_validation-569395077_FB_RUB_C4_R_small-complete	569395077	FR_b	Roughly traced	96	621	47	50	44	50	0	22	22	44	25	25	25	22	25	22	3	50	0.94	1	0.88	1	0	88	88	0.88	0.88	88	88	0.88	0.88	0.88	['Merge resulted double PSD at (33532, 29214, 19840) and (33530, 29220, 19819)', 'Low confidence PSD', 'Low confidence PSD']	rymert	569395077_combined_results_cx.csv	569395077	48	50	43	50	20	23	0.96	1	0.86	1
takemurasa-connection_validation-569736250_FB_RUB_C5_R_small-complete	569736250	FR_b	Roughly traced	87	535	50	50	37	50	0	18	19	37	25	25	25	18	25	19	2	50	1	1	0.74	1	0	72	76	0.72	0.76	72	76	0.72	0.76	0.74	['Low confidence PSD', 'Low confidence PSD']	rymert	569736250_combined_results_cx.csv	569736250	50	50	40	50	20	20	1	1	0.8	1
ordishc-connection_validation-571139809_FBRUB_C6_R-complete	571139809	FR_a	Roughly traced	241	2084	48	50	42	50	0	19	23	42	25	25	25	19	25	23	0	50	0.96	1	0.84	1	0	76	92	0.76	0.92	76	92	0.76	0.92	0.84	[]	takemurasa	571139809_combined_results_cx.csv	571139809	47	50	44	50	20	24	0.94	1	0.88	1
ogundeyio-connection_validation-576843029_put_ADL12b(dAOTU1)_R-complete	576843029	ADL12ob_pct	Roughly traced	238	686	50	50	41	50	2	20	21	41	25	25	25	20	25	21	2	50	1	1	0.82	1	0.04	80	84	0.8	0.84	80	84	0.8	0.84	0.82	['Low Confidence psd', 'Low Confidence psd']	ordishc	576843029_combined_results_mb.csv	576843029	50	50	42	50	20	22	1	1	0.84	1
603007915_put_ADL04i	603007915	ADL04od_pct	Roughly traced	210	192	49	50	36	48	5	18	18	35	25	25	20	15	22	18	5	50	0.98	1	0.72	0.96	0.1	72	72	0.72	0.72	72	72	0.75	0.818181818	0.7	['Low Confidence psd', 'False merges in psd due to poorly segmented areas', 'Autapse', 'Very Low Confidence psd', 'Low Confidence psd']		603007915_combined_results_1000.csv	603007915	48	50	40	49	20	20	0.96	1	0.8	0.98
ogundeyio-connection_validation-612746670_put_ADM07w(aSMPB)_L-complete	612746670	ADM07oc_pct	Roughly traced	218	851	50	50	37	50	3	20	17	37	25	25	25	20	25	17	3	50	1	1	0.74	1	0.06	80	68	0.8	0.68	80	68	0.8	0.68	0.74	['Low Confidence psd', 'Low Confidence psd', 'Low Confidence psd']	takemurasa	612746670_combined_results_mb.csv	612746670	50	50	39	50	20	19	1	1	0.78	1
ogundeyio-connection_validation-633793553_put_ADL24g(LBDL4)_R-complete	633793553	ADL24g_pct	Roughly traced	724	1397	49	49	37	49	2	18	19	37	25	25	25	18	25	19	3	50	0.98	0.98	0.74	0.98	0.04	72	76	0.72	0.76	72	76	0.72	0.76	0.74	['Very Low Confidence psd', 'Low Confidence psd', 'Autapse']	lohffa	633793553_combined_results_mb.csv	633793553	49	50	40	50	20	20	0.98	1	0.8	1
ordishc-connection_validation-644118254_put_ADM07u(aSMPB)_L-complete	644118254	ADM07d_b_pct	Roughly traced	246	881	49	50	42	50	0	21	21	42	25	25	25	21	25	21	0	50	0.98	1	0.84	1	0	84	84	0.84	0.84	84	84	0.84	0.84	0.84	[]	takemurasa	644118254_combined_results_mb.csv	644118254	48	50	40	50	20	20	0.96	1	0.8	1
takemurasa-connection_validation-666994301_PB12c(PF_L)_R2_irreg-complete	666994301	PFL3	Roughly traced	482	2925	45	49	39	50	0	18	21	39	25	25	25	18	25	21	1	50	0.9	0.98	0.78	1	0	72	84	0.72	0.84	72	84	0.72	0.84	0.78	['Tbar should be on 1104155212']	smithc	666994301_combined_results_cx.csv	666994301	45	49	42	50	20	22	0.9	0.98	0.84	1
rymert-connection_validation-667184255_(pLH11)_R-complete	667184255	PDL16f_pct	Roughly traced	689	1186	50	50	43	50	0	21	22	43	25	25	25	21	25	22	0	50	1	1	0.86	1	0	84	88	0.84	0.88	84	88	0.84	0.88	0.86	[]	ogundeyio	667184255_combined_results_mb.csv	667184255	50	50	42	50	20	22	1	1	0.84	1
lohffa-connection_validation-676612729_PAM04b(B2)(aSMP)_L-complete	676612729	PAM04_a	Roughly traced	225	836	50	50	41	50	6	20	21	41	25	25	25	20	25	21	8	50	1	1	0.82	1	0.12	80	84	0.8	0.84	80	84	0.8	0.84	0.82	['PSD placement not valid?', 'T-bar and PSD not valid?', 'PSD not valid?', 'PSD not valid?', 'PSD not valid?', 'low confidence PSD placement', 'low confidence PSD placement', 'PSD not valid?']	ogundeyio	676612729_combined_results_mb_retry.csv	676612729	47	50	41	50	20	21	0.94	1	0.82	1
rymert-connection_validation-705463539_FB05f(igL1)_R-complete	705463539	FB5F	Roughly traced	494	1951	48	50	44	50	3	19	25	44	25	25	25	19	25	25	3	50	0.96	1	0.88	1	0.06	76	100	0.76	1	76	100	0.76	1	0.88	['Unsure if Tbar', 'Unsure if PSD in cleft', 'Not sure if PSD in cleft']	ogundeyio	705463539_combined_results_cx.csv	705463539	48	50	45	50	20	25	0.96	1	0.9	1
ordishc-connection_validation-733458828_(A14)_R-complete	733458828	AVM04f_pct	Roughly traced	1726	6930	50	50	40	50	0	18	22	40	25	25	25	18	25	22	0	50	1	1	0.8	1	0	72	88	0.72	0.88	72	88	0.72	0.88	0.8	[]	ordishc	733458828_combined_results_mb_retry.csv	733458828	50	49	44	50	20	24	1	0.98	0.88	1
rymert-connection_validation-737189212_(pSLP4)_R-complete	737189212	SCB064_pct	Roughly traced	621	1542	50	50	43	50	0	21	22	43	25	25	25	21	25	22	0	50	1	1	0.86	1	0	84	88	0.84	0.88	84	88	0.84	0.88	0.86	[]	smithc	737189212_combined_results_mb_retry.csv	737189212	50	50	44	50	20	24	1	1	0.88	1
756870190_put_PDL16i	756870190	PDL16i_pct	Roughly traced	171	400	48	50	42	50	0	21	21	42	25	25	23	19	22	20	0	50	0.96	1	0.84	1	0	84	84	0.84	0.84	84	84	0.826086957	0.909090909	0.84	[]		756870190_combined_results_1000.csv	756870190	47	50	42	50	20	22	0.94	1	0.84	1
rymert-connection_validation-767473384_OA_VPM4-complete	767473384	OA-VPM4	Roughly traced	2681	2695	50	50	38	50	0	22	16	38	25	25	25	22	25	16	0	50	1	1	0.76	1	0	88	64	0.88	0.64	88	64	0.88	0.64	0.76	[]	rymert	767473384_combined_results_mb_retry.csv	767473384	50	50	35	50	20	15	1	1	0.7	1
takemurasa-connection_validation-794945885_FB_Q12b_C6_R-complete	794945885	FS1B	Roughly traced	93	605	50	50	38	49	0	19	19	37	25	25	25	19	25	19	2	50	1	1	0.76	0.98	0	76	76	0.76	0.76	76	76	0.76	0.76	0.74	['Low confidence PSD', 'Low confidence PSD']	ordishc	794945885_combined_results_cx.csv	794945885	50	50	41	50	20	21	1	1	0.82	1
ordishc-connection_validation-858587718_ExR4(ring)(aVT1)_R_001-complete	858587718	ExR6	Traced	2395	9461	50	50	39	49	0	18	21	39	25	25	25	18	25	21	0	50	1	1	0.78	0.98	0	72	84	0.72	0.84	72	84	0.72	0.84	0.78	[]	ordishc	858587718_combined_results_cx.csv	858587718	50	50	42	49	20	22	1	1	0.84	0.98
smithc-connection_validation-890671753_FB05d(igL1)_R-complete	890671753	FB5D	Roughly traced	613	3013	44	50	36	50	6	17	19	36	25	25	25	17	25	19	6	50	0.88	1	0.72	1	0.12	68	76	0.68	0.76	68	76	0.68	0.76	0.72	['Not sure the T-bar glyph is on a valid T-bar', 'Not sure T-bar glyph is on a valid T-bar', 'Not sure T-bar is on a valid T-bar', 'Not sure T-bar glyph is on a valid T-bar', 'Not sure T-bar glyph is on a valid T-bar', 'Not sure T-bar glyph is on a valid T-bar']	ordishc	890671753_combined_results_cx.csv	890671753	44	50	41	50	20	21	0.88	1	0.82	1
rymert-connection_validation-910783961_PB15a_R-complete	910783961	Delta7	Roughly traced	596	1115	41	50	36	49	1	17	19	36	25	25	25	17	25	19	9	50	0.82	1	0.72	0.98	0.02	68	76	0.68	0.76	68	76	0.68	0.76	0.72	['T-bar placed on downstream partner. PSD placed on FM', 'T-bar glyph placed on a PSD', 'T-bar glyph placed on a PSD', 'T-bar glyph placed on a PSD', 'PSD glyph past edge of cleft', 'T-bar glyph placed on a PSD', 'T-bar glyph placed on a PSD', 'T-bar glyph placed on a PSD', 'T-bar glyph placed on a PSD']	ordishc	910783961_combined_results_cx.csv	910783961	43	50	41	50	20	21	0.86	1	0.82	1
takemurasa-connection_validation-912147912_PB07(P_EG)_R6-complete	912147912	PEG	Roughly traced	157	1176	42	50	35	49	4	18	17	35	25	25	25	18	25	17	4	50	0.84	1	0.7	0.98	0.08	72	68	0.72	0.68	72	68	0.72	0.68	0.7	['Low confidence PSD', 'Low confidence Tbar on a HK stitch', 'Low confidence PSD', 'Low confidence PSD']	rymert	912147912_combined_results_cx.csv	912147912	42	50	38	49	20	18	0.84	1	0.76	0.98
ordishc-connection_validation-916305683_FB07g(lATL)_R-complete	916305683	FB7D	Roughly traced	182	1515	47	50	39	50	0	20	19	39	25	25	25	20	25	19	0	50	0.94	1	0.78	1	0	80	76	0.8	0.76	80	76	0.8	0.76	0.78	[]	takemurasa	916305683_combined_results_cx.csv	916305683	47	50	43	50	20	23	0.94	1	0.86	1
ordishc-connection_validation-922146751_FB04oj(igL1)_L-complete	922146751	FB4O	Roughly traced	690	1334	47	50	44	50	0	20	24	44	25	25	25	20	25	24	0	50	0.94	1	0.88	1	0	80	96	0.8	0.96	80	96	0.8	0.96	0.88	[]	ogundeyio	922146751_combined_results_cx.csv	922146751	46	50	43	50	20	23	0.92	1	0.86	1
973765182_put_AVL01n	973765182	AVL01q_pct	Roughly traced	157	176	46	50	41	50	1	20	21	41	25	25	22	18	23	21	2	50	0.92	1	0.82	1	0.02	80	84	0.8	0.84	80	84	0.818181818	0.913043478	0.82	['overannotated T-bar', 'Unsure if T-bar']	ogundeyio	973765182_combined_results_1000.csv	973765182	46	50	43	50	20	23	0.92	1	0.86	1
ordishc-connection_validation-980391580_FB08b(SFS1)_R-complete	980391580	FB8A	Roughly traced	186	615	48	50	42	50	0	20	22	42	25	25	25	20	25	22	0	50	0.96	1	0.84	1	0	80	88	0.8	0.88	80	88	0.8	0.88	0.84	[]	lohffa	980391580_combined_results_cx.csv	980391580	48	50	43	50	20	23	0.96	1	0.86	1
ordishc-connection_validation-985826737_(PSF3)_R-complete	985826737	PVM06j_pct	Roughly traced	550	1411	50	50	38	50	0	16	22	38	25	25	25	16	25	22	0	50	1	1	0.76	1	0	64	88	0.64	0.88	64	88	0.64	0.88	0.76	[]	ogundeyio	985826737_combined_results_mb_retry.csv	985826737	50	50	44	50	20	24	1	1	0.88	1
1006142645_put_AVL07m	1006142645	AVL07m_pct	Roughly traced	186	370	50	50	42	50	0	20	22	42	25	25	23	18	23	20	0	50	1	1	0.84	1	0	80	88	0.8	0.88	80	88	0.782608696	0.869565217	0.84	[]		1006142645_combined_results_1000.csv	1006142645	50	50	42	50	20	22	1	1	0.84	1
lohffa-connection_validation-1009759779_FB06n(lATL)_R-complete	1009759779	FB6J	Roughly traced	214	1433	50	47	42	49	5	18	24	38	25	25	25	18	25	24	7	50	1	0.94	0.84	0.98	0.1	72	96	0.72	0.96	72	96	0.72	0.96	0.76	['PSD not valid?', 'PSD not valid?', 'low confidence PSD placement', 'PSD not valid?', 'low confidence PSD placement', 'PSD not valid?', 'PSD not valid?']	rymert	1009759779_combined_results_cx.csv	1009759779	50	47	44	49	20	24	1	0.94	0.88	0.98
1013982515_put_ADL26b	1013982515	ADL26b_pct	Roughly traced	3284	10858	49	50	36	50	0	19	17	36	25	25	24	19	22	16	0	50	0.98	1	0.72	1	0	76	68	0.76	0.68	76	68	0.791666667	0.727272727	0.72	[]		1013982515_combined_results_1000.csv	1013982515	49	50	38	50	20	18	0.98	1	0.76	1
smithc-connection_validation-1033192275_FB_Q7b_C3_R-complete	1033192275	FC2B	Roughly traced	179	2026	49	50	45	50	1	23	22	45	25	25	25	23	25	22	1	50	0.98	1	0.9	1	0.02	92	88	0.92	0.88	92	88	0.92	0.88	0.9	['Not sure that the T-bar glyph is on a valid T-bar']	takemurasa	1033192275_combined_results_cx.csv	1033192275	47	50	43	50	20	23	0.94	1	0.86	1
rymert-connection_validation-1033196675_FB_Q7a_C3_R.json-complete	1033196675	FC2A	Roughly traced	277	2595	47	50	45	50	0	22	23	45	25	25	25	22	25	23	0	50	0.94	1	0.9	1	0	88	92	0.88	0.92	88	92	0.88	0.92	0.9	[]	ogundeyio	1033196675_combined_results_cx.csv	1033196675	45	50	41	49	20	21	0.9	1	0.82	0.98
rymert-connection_validation-1036637638_ExR3(ring)_R-complete	1036637638	ExR3	Traced	4811	10609	47	50	41	50	0	18	23	41	25	25	25	18	25	23	0	50	0.94	1	0.82	1	0	72	92	0.72	0.92	72	92	0.72	0.92	0.82	[]	takemurasa	1036637638_combined_results_cx.csv	1036637638	45	49	41	50	20	21	0.9	0.98	0.82	1
1036987921_put_PVL17e	1036987921	PVL17e_pct	Roughly traced	1301	1852	50	50	37	50	1	20	17	37	25	25	23	19	25	17	1	50	1	1	0.74	1	0.02	80	68	0.8	0.68	80	68	0.826086957	0.68	0.74	['Low Confidence psd']		1036987921_combined_results_1000.csv	1036987921	49	50	37	49	20	17	0.98	1	0.74	0.98
lohffa-connection_validation-1039392337_FB_Q7b_C4_R-complete	1039392337	FC2B	Roughly traced	225	2550	49	48	45	49	2	21	24	42	25	25	25	21	25	24	4	50	0.98	0.96	0.9	0.98	0.04	84	96	0.84	0.96	84	96	0.84	0.96	0.84	['PSD not valid?', 'I think the PSD is affected by another T-bar.', 'low confidence PSD placement', 'PSD not valid?']	ogundeyio	1039392337_combined_results_cx.csv	1039392337	49	48	45	49	20	25	0.98	0.96	0.9	0.98
takemurasa-connection_validation-1039775880_FB_Q7b_C6_R-complete	1039775880	FC2B	Roughly traced	233	2261	48	49	43	50	0	19	24	43	25	25	25	19	25	24	3	50	0.96	0.98	0.86	1	0	76	96	0.76	0.96	76	96	0.76	0.96	0.86	['Low confidence PSD', 'Low confidence PSD', 'Low confidence PSD']	smithc	1039775880_combined_results_cx.csv	1039775880	49	49	45	49	20	25	0.98	0.98	0.9	0.98
takemurasa-connection_validation-1043825714_ExR5(ring)(lATL)_R_001-complete	1043825714	ExR5	Traced	1086	3230	47	50	39	49	0	21	18	38	25	25	25	21	25	18	0	50	0.94	1	0.78	0.98	0	84	72	0.84	0.72	84	72	0.84	0.72	0.76	[]	ordishc	1043825714_combined_results_cx.csv	1043825714	47	50	41	49	20	21	0.94	1	0.82	0.98
lohffa-connection_validation-1048250312_(MEF2)_R-complete	1048250312	PVM03c_pct	Roughly traced	591	2385	49	50	46	49	0	22	24	45	25	25	25	22	25	24	2	50	0.98	1	0.92	0.98	0	88	96	0.88	0.96	88	96	0.88	0.96	0.9	['low confidence PSD placement', 'low confidenc PSD placement']	rymert	1048250312_combined_results_mb_retry.csv	1048250312	49	50	42	49	20	22	0.98	1	0.84	0.98
lohffa-connection_validation-1062849983_FB_RUB_C3_R-complete	1062849983	FR_a	Roughly traced	184	2069	47	48	45	50	2	21	24	43	25	25	25	21	25	24	4	50	0.94	0.96	0.9	1	0.04	84	96	0.84	0.96	84	96	0.84	0.96	0.86	['PSD not valid?', 'low confidence PSD placement', 'PSD placement should be on different spot on body', 'PSD not valid?']	ordishc	1062849983_combined_results_cx.csv	1062849983	47	49	44	50	20	24	0.94	0.98	0.88	1
ordishc-connection_validation-1078693835_MBON09(y3B'1)(AMVF4)_R_001.json-complete	1078693835	MBON09	Traced	1297	23111	49	49	43	50	0	19	24	42	25	25	25	19	25	24	0	50	0.98	0.98	0.86	1	0	76	96	0.76	0.96	76	96	0.76	0.96	0.84	[]	ordishc	1078693835_combined_results_mb.csv	1078693835	49	49	43	50	20	23	0.98	0.98	0.86	1
ogundeyio-connection_validation-1101487727_FB04Bc(igL1)_R-complete	1101487727	FB5X	Roughly traced	452	1866	50	50	41	50	4	20	21	41	25	25	25	20	25	21	4	50	1	1	0.82	1	0.08	80	84	0.8	0.84	80	84	0.8	0.84	0.82	['Low Confidence psd', 'Low Confidence Tbar', 'Low Confidence psd', 'Low Confidence psd']	ogundeyio	1101487727_combined_results_cx.csv	1101487727	50	50	42	50	20	22	1	1	0.84	1
ogundeyio-connection_validation-1131827390_FB04y(PPM3_FB3_4_NO_DAN)(MEF1)_R-complete	1131827390	FB4M	Traced	2614	4423	50	50	40	50	7	21	19	40	25	25	25	21	25	19	7	50	1	1	0.8	1	0.14	84	76	0.84	0.76	84	76	0.84	0.76	0.8	['Very Low Confidence psd', 'Low Confidence psd', 'Low Confidence psd', 'Very Low Confidence psd', 'Very Low Confidence psd', 'Low Confidence psd', 'Very Low Confidence psd']	rymert	1131827390_combined_results_cx_remakes.csv	1131827390	47	50	37	50	20	17	0.94	1	0.74	1
ogundeyio-connection_validation-1131827565_FB04ob(igL1)_L-complete	1131827565	FB4Q_b	Roughly traced	525	1377	50	50	42	50	6	21	21	42	25	25	25	21	25	21	6	50	1	1	0.84	1	0.12	84	84	0.84	0.84	84	84	0.84	0.84	0.84	['Low Confidence Tbar and psd', 'Low Confidence psd', 'Low Confidence psd', 'Low Confidence psd', 'Low Confidence psd', 'Low Confidence psd']	rymert	1131827565_combined_results_cx.csv	1131827565	50	50	44	50	20	24	1	1	0.88	1
lohffa-connection_validation-1136204852_PB10_R9-complete	1136204852	PFGs	Roughly traced	464	2154	49	49	40	49	1	18	22	38	25	25	25	18	25	22	3	50	0.98	0.98	0.8	0.98	0.02	72	88	0.72	0.88	72	88	0.72	0.88	0.76	['PSD not valid?', 'PSD affected by nearby T-bar', 'Multiple T-bar glifs, PSD affected closer T-bar']	rymert	1136204852_combined_results_cx.csv	1136204852	48	49	43	49	20	23	0.96	0.98	0.86	0.98
rymert-connection_validation-1140249804_LAL_PS(mAOTU1)_R-complete	1140249804	LVe-SpIp	Roughly traced	1203	9504	49	50	43	49	0	19	24	43	25	25	25	19	25	24	0	50	0.98	1	0.86	0.98	0	76	96	0.76	0.96	76	96	0.76	0.96	0.86	[]	rymert	1140249804_combined_results_mb.csv	1140249804	49	50	44	50	20	24	0.98	1	0.88	1
rymert-connection_validation-1190076947_(iPB5)_R-complete	1190076947	PDM16b_pct	Roughly traced	108	312	46	49	41	50	0	19	22	41	25	25	25	19	25	22	0	50	0.92	0.98	0.82	1	0	76	88	0.76	0.88	76	88	0.76	0.88	0.82	[]	ordishc	1190076947_combined_results_mb.csv	1190076947	47	49	41	50	20	21	0.94	0.98	0.82	1
takemurasa-connection_validation-1194942043_FB_Q6a_C6_R-complete	1194942043	FC1_a	Roughly traced	165	808	50	49	37	48	0	19	18	37	25	25	25	19	25	18	5	50	1	0.98	0.74	0.96	0	76	72	0.76	0.72	76	72	0.76	0.72	0.74	['Low confidence PSD', 'Split needed', 'Low confidence PSD', 'Low confidence Tbar', 'Low confidence Tbar']	ordishc	1194942043_combined_results_cx.csv	1194942043	49	49	42	48	20	22	0.98	0.98	0.84	0.96
ogundeyio-connection_validation-1198049989_FB_Q7d_C9_R-complete	1198049989	FC2D	Roughly traced	142	1084	50	50	40	50	1	18	22	40	25	25	25	18	25	22	1	50	1	1	0.8	1	0.02	72	88	0.72	0.88	72	88	0.72	0.88	0.8	['Low Confidence psd']	ogundeyio	1198049989_combined_results_cx.csv	1198049989	50	50	41	50	20	21	1	1	0.82	1
smithc-connection_validation-1198654537_FB_Q6a_C2_R.json-complete	1198654537	FC1_a	Roughly traced	179	703	47	50	40	49	3	21	19	39	25	25	25	21	25	19	3	50	0.94	1	0.8	0.98	0.06	84	76	0.84	0.76	84	76	0.84	0.76	0.78	['Not sure the T-bar glyph is on a valid T-bar', 'Not sure the T-bar glyph is on a valid T-bar', 'Not sure that T-bar glyph is on a valid T-bar']	smithc	1198654537_combined_results_cx.csv	1198654537	47	50	39	49	20	19	0.94	1	0.78	0.98
ogundeyio-connection_validation-1204063702_(PLPF11)_R-complete	1204063702	PVL04f_pct	Roughly traced	229	441	49	50	34	50	4	19	15	34	25	25	25	19	25	15	4	50	0.98	1	0.68	1	0.08	76	60	0.76	0.6	76	60	0.76	0.6	0.68	['Low Confidence psd', 'Low Confidence psd', 'Low Confidence psd', 'Low Confidence psd']	ogundeyio	1204063702_combined_results_mb_retry.csv	1204063702	49	50	37	50	20	17	0.98	1	0.74	1
takemurasa-connection_validation-1224945409_FB02c(agL1)_L-complete	1224945409	FB2B_b	Roughly traced	619	1370	49	50	41	50	4	19	22	41	25	25	25	19	25	22	3	50	0.98	1	0.82	1	0.08	76	88	0.76	0.88	76	88	0.76	0.88	0.82	['Low confidence PSD', 'Low confidence PSD', 'Low confidence PSD']	lohffa	1224945409_combined_results_cx.csv	1224945409	49	50	42	50	20	22	0.98	1	0.84	1
ogundeyio-connection_validation-1225640135_FB04w(PPM3_FB3_4_DAN)(MEF1)_R-complete	1225640135	FB4L	Traced	612	1736	50	50	41	50	5	21	20	41	25	25	25	21	25	20	5	50	1	1	0.82	1	0.1	84	80	0.84	0.8	84	80	0.84	0.8	0.82	['Low Confidence psd', 'Low Confidence psd', 'Low Confidence psd', 'Low Confidence psd', 'Very Low Confidence psd']	ogundeyio	1225640135_combined_results_cx_remakes.csv	1225640135	46	50	38	50	20	18	0.92	1	0.76	1
takemurasa-connection_validation-1261130127_FB_Q10c_C9_L-complete	1261130127	FS2B	Roughly traced	107	637	48	50	36	49	0	19	17	36	25	25	25	19	25	17	9	50	0.96	1	0.72	0.98	0	76	68	0.76	0.68	76	68	0.76	0.68	0.72	['Low confidence PSD', 'Not a PSD. It is a Tbar density.', 'Low confidence PSD', 'Low confidence PSD', 'Split needed at (30592, 24368, 17792)', 'Low confidence PSD', 'Split needed', 'Low confidence PSD', 'Low confidence PSD']	rymert	1261130127_combined_results_cx.csv	1261130127	45	50	38	49	20	18	0.9	1	0.76	0.98
ogundeyio-connection_validation-1291374677_FB_Q9_C1_R-complete	1291374677	FS1C	Roughly traced	105	1092	46	49	40	50	3	18	22	40	25	25	25	18	25	22	3	50	0.92	0.98	0.8	1	0.06	72	88	0.72	0.88	72	88	0.72	0.88	0.8	['Low Confidence psd', 'Low Confidence psd', 'Low Confidence psd']	lohffa	1291374677_combined_results_cx.csv	1291374677	47	50	41	50	20	21	0.94	1	0.82	1
ordishc-connection_validation-1324430237_R6(ring)(igL2)_R-complete	1324430237	R6	Traced	550	2216	49	49	41	48	0	19	22	40	25	25	25	19	25	22	0	50	0.98	0.98	0.82	0.96	0	76	88	0.76	0.88	76	88	0.76	0.88	0.8	[]	lohffa	1324430237_combined_results_cx.csv	1324430237	49	49	44	48	20	24	0.98	0.98	0.88	0.96
1385429936_put_AVL13c	1385429936	AVL13c_pct	Roughly traced	1247	3989	49	50	37	50	1	17	20	37	25	25	21	17	24	20	1	50	0.98	1	0.74	1	0.02	68	80	0.68	0.8	68	80	0.80952381	0.833333333	0.74	['Low Confidence psd']		1385429936_combined_results_1000.csv	1385429936	49	50	41	50	20	21	0.98	1	0.82	1
takemurasa-connection_validation-1434639206_Delta12f_R-complete	1434639206	Delta0H	Roughly traced	138	655	47	50	38	50	0	19	19	38	25	25	25	19	25	19	1	50	0.94	1	0.76	1	0	76	76	0.76	0.76	76	76	0.76	0.76	0.76	['Merge resulted double PSD']	smithc	1434639206_combined_results_cx.csv	1434639206	46	50	41	50	20	21	0.92	1	0.82	1
ogundeyio-connection_validation-1439979802_put_ADL02u(hLHT1)_R-complete	1439979802	ADL02u_pct	Traced	1382	2036	49	50	37	50	1	20	17	37	25	25	25	20	25	17	1	50	0.98	1	0.74	1	0.02	80	68	0.8	0.68	80	68	0.8	0.68	0.74	['Low Confidence psd']	ordishc	1439979802_combined_results_mb.csv	1439979802	50	50	41	50	20	21	1	1	0.82	1
smithc-connection_validation-1449247522_ExR6(PPM3_EB_DAN_ring)(MEF1)_R_001-complete	1449247522	ExR2	Traced	1124	2461	43	50	43	50	6	20	23	43	25	25	25	20	25	23	6	50	0.86	1	0.86	1	0.12	80	92	0.8	0.92	80	92	0.8	0.92	0.86	['Not sure the T-bar glyph is on a valid T-bar', 'Not sure T-bar glyph is on a valid T-bar', 'Not sure T-bar glyph is on a valid T-bar', 'Not sure T-bar glyph is on a valid T-bar, may be a PSD for a different synapse', 'Not sure T-bar glyph is on a valid T-bar', 'Not sure T-bar glyph is on a valid T-bar, seems to be a PSD for another synapse']	smithc	1449247522_combined_results_cx_remakes.csv	1449247522	44	50	40	50	20	20	0.88	1	0.8	1
1504406220_put_PDL12vB	1504406220	PDL12v_b_pct	Roughly traced	281	389	49	50	40	50	2	19	21	40	25	25	23	18	24	21	2	50	0.98	1	0.8	1	0.04	76	84	0.76	0.84	76	84	0.782608696	0.875	0.8	['Low Confidence psd', 'Very Low Confidence psd']		1504406220_combined_results_1000.csv	1504406220	50	50	42	50	20	22	1	1	0.84	1
ogundeyio-connection_validation-1600420555_LAL_NO1(aVT1)_R-complete	1600420555	GLN	Roughly traced	481	1887	50	50	39	50	4	20	19	39	24	26	24	20	26	19	6	50	1	1	0.78	1	0.08	83.33333333	73.07692308	0.833333333	0.730769231	83.33333333	73.07692308	0.833333333	0.730769231	0.78	['Low Confidence psd', 'Autapse', 'Low Confidence psd', 'Low Confidence Tbar', 'Low Confidence psd', 'Low Confidence psd']	lohffa	1600420555_combined_results_cx.csv	1600420555	48	50	39	50	20	19	0.96	1	0.78	1
ordishc-connection_validation-5812983846_FB04oa(igL1)_R-complete	5812983846	FB4P_b	Roughly traced	734	1494	46	50	38	49	0	19	19	37	25	25	25	19	25	19	0	50	0.92	1	0.76	0.98	0	76	76	0.76	0.76	76	76	0.76	0.76	0.74	[]	takemurasa	5812983846_combined_results_cx.csv	5812983846	46	50	40	49	20	20	0.92	1	0.8	0.98
takemurasa-connection_validation-5812986472_FB_Q7d_C2_R-complete	5812986472	FC2D	Roughly traced	162	1504	48	48	43	50	0	20	23	42	25	25	25	20	25	23	5	50	0.96	0.96	0.86	1	0	80	92	0.8	0.92	80	92	0.8	0.92	0.84	['Low confidence PSD', 'Split needed at (21203, 25258, 19744)', 'Low confidence PSD', 'Low confidence PSD', 'Low confidence PSD']	ogundeyio	5812986472_combined_results_cx.csv	5812986472	47	48	43	50	20	23	0.94	0.96	0.86	1
ordishc-connection_validation-5812986798_FBQ11_C8_R-complete	5812986798	FS3B	Roughly traced	61	347	47	49	40	50	0	19	21	40	25	25	25	19	25	21	1	50	0.94	0.98	0.8	1	0	76	84	0.76	0.84	76	84	0.76	0.84	0.8	['HK']	ogundeyio	5812986798_combined_results_cx.csv	5812986798	46	49	41	50	20	21	0.92	0.98	0.82	1
rymert-connection_validation-5812987684_ExR7(ring)_L_001-complete	5812987684	ExR7	Traced	822	2886	48	50	42	50	0	18	24	42	25	25	25	18	25	24	0	50	0.96	1	0.84	1	0	72	96	0.72	0.96	72	96	0.72	0.96	0.84	[]	ordishc	5812987684_combined_results_cx.csv	5812987684	46	49	43	49	20	23	0.92	0.98	0.86	0.98
rymert-connection_validation-5813019850_put_AVL03a(hVLPF1)_R-complete	5813019850	AVL03op_pct	Roughly traced	1104	5341	49	50	44	50	0	21	23	44	25	25	25	21	25	23	0	50	0.98	1	0.88	1	0	84	92	0.84	0.92	84	92	0.84	0.92	0.88	[]	ordishc	5813019850_combined_results_mb.csv	5813019850	48	50	43	50	20	23	0.96	1	0.86	1
ogundeyio-connection_validation-5813020846_put_ADL12u(dAOTU1)_R-complete	5813020846	ADL12u_pct	Roughly traced	532	1699	48	50	37	50	4	18	19	37	25	25	25	18	25	19	4	50	0.96	1	0.74	1	0.08	72	76	0.72	0.76	72	76	0.72	0.76	0.74	['Low Confidence psd', 'Low Confidence psd', 'Low Confidence psd', 'Low Confidence psd']	ordishc	5813020846_combined_results_mb.csv	5813020846	47	50	40	50	20	20	0.94	1	0.8	1
ordishc-connection_validation-5813021291_MBON28(PLPF4)_R_002-complete	5813021291	PVL03ol_pct	Traced	817	4291	47	50	42	49	0	19	23	42	25	25	25	19	25	23	0	50	0.94	1	0.84	0.98	0	76	92	0.76	0.92	76	92	0.76	0.92	0.84	[]	ogundeyio	5813021291_combined_results_mb.csv	5813021291	48	50	43	49	20	23	0.96	1	0.86	0.98
ordishc-connection_validation-5813022794_put_PDM36-complete	5813022794	SCB062_pct	Roughly traced	479	2235	50	50	42	50	0	21	21	42	25	25	25	21	25	21	0	50	1	1	0.84	1	0	84	84	0.84	0.84	84	84	0.84	0.84	0.84	[]	takemurasa	5813022794_combined_results_mb.csv	5813022794	50	50	43	50	20	23	1	1	0.86	1
takemurasa-connection_validation-5813047683_LNd_like(pLH5)_R.json-complete	5813047683	PDL27e_pct	Roughly traced	2267	5028	47	50	39	49	0	19	20	38	25	25	25	19	25	20	0	50	0.94	1	0.78	0.98	0	76	80	0.76	0.8	76	80	0.76	0.8	0.76	[]	smithc	5813047683_combined_results_mb_retry.csv	5813047683	48	50	41	49	20	21	0.96	1	0.82	0.98
rymert-connection_validation-5813055759_(pSM2)_R-complete	5813055759	PDM12oq_pct	Roughly traced	144	402	49	50	39	49	0	18	21	38	25	25	25	18	25	21	2	50	0.98	1	0.78	0.98	0	72	84	0.72	0.84	72	84	0.72	0.84	0.76	['PSD needs split', 'T-bar glyph placed on a PSD']	takemurasa	5813055759_combined_results_mb.csv	5813055759	49	50	42	50	20	22	0.98	1	0.84	1
ogundeyio-connection_validation-5813069630_put_ADL16q(LBDL8)_R-complete	5813069630	ADL16q_pct	Roughly traced	1264	1769	47	50	31	50	5	19	12	31	25	25	25	19	25	12	5	50	0.94	1	0.62	1	0.1	76	48	0.76	0.48	76	48	0.76	0.48	0.62	['Low Confidence psd', 'Low Confidence psd', 'Low Confidence psd', 'Low Confidence psd', 'Low Confidence psd']	rymert	5813069630_combined_results_mb_retry.csv	5813069630	46	50	30	50	20	10	0.92	1	0.6	1
ogundeyio-connection_validation-5813070991_put_ADM07i(aSMPB)_R-complete	5813070991	ADM07i_pct	Roughly traced	514	2217	50	50	37	49	2	19	18	37	25	25	25	19	25	18	2	50	1	1	0.74	0.98	0.04	76	72	0.76	0.72	76	72	0.76	0.72	0.74	['Low Confidence psd', 'Autapse']	lohffa	5813070991_combined_results_mb.csv	5813070991	50	50	37	50	20	17	1	1	0.74	1
rymert-connection_validation-5813105172_DPM_R-complete	5813105172	DPM	Roughly traced	17628	77269	48	48	40	50	2	19	21	39	25	25	25	19	25	21	3	50	0.96	0.96	0.8	1	0.04	76	84	0.76	0.84	76	84	0.76	0.84	0.78	['Unsure if Tbar or PSD', 'PSD too far away from cleft', 'PSD on edge of cleft']	ogundeyio	5813105172_combined_results_mb.csv	5813105172	45	48	43	50	20	23	0.9	0.96	0.86	1
265155147_put_PDM18bA	265155147	PDM18b_pct	Roughly traced	68	164	48	50	37	49	5	19	18	36	25	25	24	18	25	18	5	50	0.96	1	0.74	0.98	0.1	76	72	0.76	0.72	76	72	0.75	0.72	0.72	['Low Confidence psd', 'Low Confidence psd', 'Low Confidence psd', 'Low Confidence psd', 'False merge in psd. They should be two separate bodies']		265155147_combined_results_1000.csv	265155147	49	50	41	49	21	20	0.98	1	0.82	0.98
smithc-connection_validation-296851261_FB08m(igL1)_R-complete	296851261	FB8G	Roughly traced	330	1243	48	50	43	50	0	20	23	43	25	25	25	20	25	23	2	50	0.96	1	0.86	1	0	80	92	0.8	0.92	80	92	0.8	0.92	0.86	['T-bar glyph is not on a T-Bar', 'T-bar glyph is not on a T-bar']	takemurasa	296851261_combined_results_cx.csv	296851261	47	50	45	50	21	24	0.94	1	0.9	1
ordishc-connection_validation-298944444_FB06oa(igL1)_R-complete	298944444	FB6U	Roughly traced	537	2678	50	50	44	50	0	20	24	44	25	25	25	20	25	24	0	50	1	1	0.88	1	0	80	96	0.8	0.96	80	96	0.8	0.96	0.88	[]	ordishc	298944444_combined_results_cx.csv	298944444	50	50	45	50	21	24	1	1	0.9	1
ogundeyio-connection_validation-329578247_put_ADL17a(aSIP1)_R-complete	329578247	ADL17s_pct	Roughly traced	404	1078	49	50	39	50	2	21	18	39	25	25	25	21	25	18	2	50	0.98	1	0.78	1	0.04	84	72	0.84	0.72	84	72	0.84	0.72	0.78	['Low Confidence psd', 'Low Confidence psd']	rymert	329578247_combined_results_mb.csv	329578247	49	50	41	50	21	20	0.98	1	0.82	1
361355033_put_PDL18h	361355033	PDL18h_pct	Roughly traced	170	516	45	50	36	50	2	19	17	36	25	25	21	17	22	17	2	50	0.9	1	0.72	1	0.04	76	68	0.76	0.68	76	68	0.80952381	0.772727273	0.72	['Low Confidence psd', 'Low Confidence psd']		361355033_combined_results_1000.csv	361355033	47	50	40	50	21	19	0.94	1	0.8	1
smithc-connection_validation-392389970_put_ADM11d(sgL2)_R-complete	392389970	ADM11d_pct	Roughly traced	507	1786	47	50	35	50	3	20	15	35	25	25	25	20	25	15	3	50	0.94	1	0.7	1	0.06	80	60	0.8	0.6	80	60	0.8	0.6	0.7	['Not sure T-bar glyph is on a valid T-bar', 'Not sure T-bar glyph is on a valid T-bar', 'Not sure T-bar glyph is on a valid T-bar']	ordishc	392389970_combined_results_mb_retry.csv	392389970	47	50	39	50	21	18	0.94	1	0.78	1
422622063_put_ADL25d	422622063	ADL25oa_pct	Roughly traced	576	2017	49	50	44	50	0	21	23	44	25	25	20	19	23	21	0	50	0.98	1	0.88	1	0	84	92	0.84	0.92	84	92	0.95	0.913043478	0.88	[]		422622063_combined_results_1000.csv	422622063	48	50	41	50	21	20	0.96	1	0.82	1
lohffa-connection_validation-451689001_(iPB1)_R-complete	451689001	DNp25	Roughly traced	162	763	47	50	41	50	3	18	23	41	25	25	25	18	25	23	7	50	0.94	1	0.82	1	0.06	72	92	0.72	0.92	72	92	0.72	0.92	0.82	['low confidence PSD placement', 'Multiple T-bars', 'T-bar and PSD not valid?', 'T-bar and PSD not valid?', 'PSD affected by nearby T-bar', 'T-bar and PSD not valid?', 'low confidence PSD placement']	rymert	451689001_combined_results_mb_retry.csv	451689001	46	50	46	50	21	25	0.92	1	0.92	1
rymert-connection_validation-452029745_FB06k(SFS1)_R-complete	452029745	FB6I	Roughly traced	1004	2003	49	50	43	50	2	21	22	43	25	25	25	21	25	22	3	50	0.98	1	0.86	1	0.04	84	88	0.84	0.88	84	88	0.84	0.88	0.86	['PSD near cleft', 'PSD away from cleft', 'edge of cleft PSD']	lohffa	452029745_combined_results_cx.csv	452029745	49	50	40	50	21	19	0.98	1	0.8	1
takemurasa-connection_validation-478613576_LH_CA(SIPT3)_R.json-complete	478613576	PDM30e_pct	Roughly traced	1131	2947	46	50	38	50	0	21	17	38	25	25	25	21	25	17	0	50	0.92	1	0.76	1	0	84	68	0.84	0.68	84	68	0.84	0.68	0.76	[]	rymert	478613576_combined_results_mb_retry.csv	478613576	47	50	39	50	21	18	0.94	1	0.78	1
rymert-connection_validation-487925037_MBON03(B'2mp)(aSMPB)_R-complete	487925037	MBON03	Traced	1368	18217	50	50	43	50	0	21	22	43	25	25	25	21	25	22	0	50	1	1	0.86	1	0	84	88	0.84	0.88	84	88	0.84	0.88	0.86	[]	ordishc	487925037_combined_results_mb_retry.csv	487925037	50	50	44	50	21	23	1	1	0.88	1
lohffa-connection_validation-488572496_put_ADM07oh(aSMPB)_R-complete	488572496	ADM07b_pct	Roughly traced	325	1496	48	50	44	50	1	20	24	44	25	25	25	20	25	24	5	50	0.96	1	0.88	1	0.02	80	96	0.8	0.96	80	96	0.8	0.96	0.88	['low confidence PSD placement', 'PSD not valid?', 'Multiple T-bars', 'low confidence PSD placement', 'low confidence PSD placement']	ordishc	488572496_combined_results_mb_retry.csv	488572496	48	50	45	50	21	24	0.96	1	0.9	1
takemurasa-connection_validation-513784136_FB0103(iPB2)_R-complete	513784136	FB1G	Roughly traced	1827	3748	49	50	39	49	0	21	18	39	25	25	25	21	25	18	1	50	0.98	1	0.78	0.98	0	84	72	0.84	0.72	84	72	0.84	0.72	0.78	['Split needed at (16621, 27724, 21760)']	lohffa	513784136_combined_results_cx.csv	513784136	49	50	39	50	21	18	0.98	1	0.78	1
515152792_put_PDM10t	515152792	PDM10t_pct	Roughly traced	157	777	49	49	37	49	3	20	17	37	25	25	24	20	21	16	3	50	0.98	0.98	0.74	0.98	0.06	80	68	0.8	0.68	80	68	0.833333333	0.761904762	0.74	['False merge in Tbar', 'Low Confidence psd', 'May be a very low confidence psd']		515152792_combined_results_1000.csv	515152792	49	49	41	49	21	20	0.98	0.98	0.82	0.98
smithc-connection_validation-519046655_FB0104(NO2_3)(SMPF)_L-complete	519046655	FB1H	Traced	3815	7901	49	50	42	50	0	21	21	42	25	25	25	21	25	21	1	50	0.98	1	0.84	1	0	84	84	0.84	0.84	84	84	0.84	0.84	0.84	['Both T-bar site and PSD site are PSDs to another synapse']	lohffa	519046655_combined_results_cx_remakes.csv	519046655	50	50	41	50	21	20	1	1	0.82	1
ordishc-connection_validation-543718301_(pCF4)_R-complete	543718301	PVM14d_pct	Roughly traced	543	1176	50	50	43	50	0	20	23	43	25	25	25	20	25	23	0	50	1	1	0.86	1	0	80	92	0.8	0.92	80	92	0.8	0.92	0.86	[]	lohffa	543718301_combined_results_mb.csv	543718301	50	50	44	50	21	23	1	1	0.88	1
takemurasa-connection_validation-572167406_PB01a_R2-complete	572167406	PFNp_a	Roughly traced	63	262	48	50	39	50	5	19	20	39	25	25	25	19	25	20	5	50	0.96	1	0.78	1	0.1	76	80	0.76	0.8	76	80	0.76	0.8	0.78	['Low confidence PSD', 'Low confidence PSD', 'Low confidence PSD', 'Low confidence PSD', 'Low confidence']	smithc	572167406_combined_results_cx.csv	572167406	48	50	42	50	21	21	0.96	1	0.84	1
ogundeyio-connection_validation-574377562_put_ADL24f(LBDL4)_R-complete	574377562	ADL24f_pct	Roughly traced	1276	1774	49	50	40	50	3	18	22	40	25	25	25	18	25	22	3	50	0.98	1	0.8	1	0.06	72	88	0.72	0.88	72	88	0.72	0.88	0.8	['Low Confidence psd', 'Low Confidence psd', 'Low Confidence psd']	ordishc	574377562_combined_results_mb_retry.csv	574377562	49	50	43	50	21	22	0.98	1	0.86	1
ogundeyio-connection_validation-612742248_MBON25(y1y2)(aSMPB)_L-complete	612742248	MBON25	Roughly traced	232	1414	49	50	39	49	1	20	19	39	24	26	24	20	26	19	2	50	0.98	1	0.78	0.98	0.02	83.33333333	73.07692308	0.833333333	0.730769231	83.33333333	73.07692308	0.833333333	0.730769231	0.78	['Autapse', 'Low Confidence psd']	rymert	612742248_combined_results_mb.csv	612742248	49	50	40	50	21	19	0.98	1	0.8	1
ordishc-connection_validation-613044611_put_ADM02b(aSMP)_R-complete	613044611	ADM02b_pct	Roughly traced	458	2406	49	50	36	49	0	18	18	35	24	26	24	18	26	18	0	50	0.98	1	0.72	0.98	0	75	69.23076923	0.75	0.692307692	75	69.23076923	0.75	0.692307692	0.7	[]	takemurasa	613044611_combined_results_mb.csv	613044611	48	50	40	50	21	19	0.96	1	0.8	1
633684017_put_PDL19e	633684017	PDL19e_pct	Roughly traced	184	321	45	50	45	50	5	21	24	45	25	25	25	21	22	21	8	50	0.9	1	0.9	1	0.1	84	96	0.84	0.96	84	96	0.84	0.954545455	0.9	['low confidence PSD placement', 'PSD not valid?', 'low confidence PSD placement', 'T-bar and PSD not valid?', 'low confidence PSD placement', 'Unable to select PSD or T-bar; unable to determine if correct.', 'Unable to select PSD or T-bar; unable to determine if correct.', 'Unable to select PSD or T-bar; unable to determine if correct.']		633684017_combined_results_1000.csv	633684017	45	50	45	50	21	24	0.9	1	0.9	1
lohffa-connection_validation-635908014_put_ADM01od(SMPF)_R-complete	635908014	ADM01od_pct	Roughly traced	488	3348	50	50	46	50	1	23	23	46	25	25	25	23	25	23	4	50	1	1	0.92	1	0.02	92	92	0.92	0.92	92	92	0.92	0.92	0.92	['PSD not valid?', 'low confidence PSD placement', 'low confidence PSD placement', 'low confidence PSD placement']	ogundeyio	635908014_combined_results_mb_retry.csv	635908014	50	50	45	50	21	24	1	1	0.9	1
takemurasa-connection_validation-638074940_FB_Q12b_C8_R-complete	638074940	FS4B	Roughly traced	72	355	47	50	37	49	0	17	20	37	25	25	25	17	25	20	5	50	0.94	1	0.74	0.98	0	68	80	0.68	0.8	68	80	0.68	0.8	0.74	['Low confidence PSD', 'Low confidence PSD', 'Low confidence PSD', 'Low confidence PSD', 'Split needed at (29721, 19880, 21428)']	takemurasa	638074940_combined_results_cx.csv	638074940	46	49	42	50	21	21	0.92	0.98	0.84	1
lohffa-connection_validation-641688553_put_ADM10e(ABDL)_R-complete	641688553	ADM10e_pct	Roughly traced	1277	6738	50	50	45	50	0	21	24	45	25	25	25	21	25	24	3	50	1	1	0.9	1	0	84	96	0.84	0.96	84	96	0.84	0.96	0.9	['low confidence PSD placement', 'low confidence PSD placement', 'low confidence PSD placement']	ogundeyio	641688553_combined_results_mb.csv	641688553	50	50	44	50	21	23	1	1	0.88	1
rymert-connection_validation-642664141_MBON15(a'1)(SFS1)_R_001-complete	642664141	MBON15	Traced	234	1864	48	50	42	50	0	21	21	42	25	25	25	21	25	21	0	50	0.96	1	0.84	1	0	84	84	0.84	0.84	84	84	0.84	0.84	0.84	[]	smithc	642664141_combined_results_mb_retry.csv	642664141	48	50	44	50	21	23	0.96	1	0.88	1
ordishc-connection_validation-642702809_(igL2)_R-complete	642702809	AVM07j_pct	Roughly traced	615	4107	49	50	41	50	0	21	20	41	25	25	25	21	25	20	0	50	0.98	1	0.82	1	0	84	80	0.84	0.8	84	80	0.84	0.8	0.82	[]	takemurasa	642702809_combined_results_mb.csv	642702809	49	50	42	50	21	21	0.98	1	0.84	1
rymert-connection_validation-644433538_put_ADL08d(sgL1)_R-complete	644433538	ADL08j_pct	Roughly traced	557	1097	48	49	40	49	0	22	18	40	25	25	25	22	25	18	0	50	0.96	0.98	0.8	0.98	0	88	72	0.88	0.72	88	72	0.88	0.72	0.8	[]	takemurasa	644433538_combined_results_mb.csv	644433538	48	49	39	49	21	18	0.96	0.98	0.78	0.98
lohffa-connection_validation-673776769_put_ADM12f(AMcir1)_R-complete	673776769	ADM12f_pct	Roughly traced	575	5556	47	48	44	49	3	19	25	43	25	25	25	19	25	25	5	50	0.94	0.96	0.88	0.98	0.06	76	100	0.76	1	76	100	0.76	1	0.86	['T-bar and PSD are same body due to poor segmentation', 'low confidence PSD placement', 'PSD affected by nearby T-bar', 'PSD not valid?', 'PSD not valid?']	lohffa	673776769_combined_results_mb_retry.csv	673776769	48	48	45	49	21	24	0.96	0.96	0.9	0.98
lohffa-connection_validation-675528661_put_ADM07y(aSMPB)_R-complete	675528661	ADM07y_pct	Roughly traced	983	4289	50	50	43	50	4	22	21	43	25	25	25	22	25	21	7	50	1	1	0.86	1	0.08	88	84	0.88	0.84	88	84	0.88	0.84	0.86	['PSD affected by different T-bar', 'low confidence PSD placement', 'PSD not valid?', 'low confidence PSD placement', 'PSD not valid?', 'PSD not valid?', 'low confidence PSD placement']	ordishc	675528661_combined_results_mb_retry.csv	675528661	50	50	42	50	21	21	1	1	0.84	1
rymert-connection_validation-695124651_aMe3-complete	695124651	aMe3	Roughly traced	1614	1055	47	49	41	50	2	21	20	40	25	25	25	21	25	20	2	50	0.94	0.98	0.82	1	0.04	84	80	0.84	0.8	84	80	0.84	0.8	0.8	['PSD on edge of cleft', 'Messy segmentation from hotknife ']	takemurasa	695124651_combined_results_mb.csv	695124651	47	49	40	50	21	19	0.94	0.98	0.8	1
smithc-connection_validation-788400963_FB_RUB_C8_R-complete	788400963	FR_a	Roughly traced	246	2039	47	50	39	50	3	18	21	39	25	25	25	18	25	21	3	50	0.94	1	0.78	1	0.06	72	84	0.72	0.84	72	84	0.72	0.84	0.78	['Not sure the T-bar glyph is on a valid T-bar', 'Not sure the T-bar glyph is on a valid T-bar', 'Not sure T-bar glyph is on a valid T-bar']	lohffa	788400963_combined_results_cx.csv	788400963	46	50	42	50	21	21	0.92	1	0.84	1
790305346_put_PDM13g	790305346	PDM13g_pct	Traced	1588	2724	49	50	34	50	1	19	15	34	25	25	23	19	22	14	1	50	0.98	1	0.68	1	0.02	76	60	0.76	0.6	76	60	0.826086957	0.636363636	0.68	['Low Confidence psd']		790305346_combined_results_1000.csv	790305346	49	50	37	50	21	16	0.98	1	0.74	1
ordishc-connection_validation-821686394_(A13)_R-complete	821686394	AVM03a_pct	Traced	1367	4387	48	50	35	50	0	19	16	35	25	25	25	19	25	16	0	50	0.96	1	0.7	1	0	76	64	0.76	0.64	76	64	0.76	0.64	0.7	[]	rymert	821686394_combined_results_mb_retry.csv	821686394	48	50	40	50	21	19	0.96	1	0.8	1
lohffa-connection_validation-826416797_(AEF2)_R-complete	826416797	AVL08v_pct	Roughly traced	326	1655	46	50	45	50	3	22	23	45	25	25	25	22	25	23	6	50	0.92	1	0.9	1	0.06	88	92	0.88	0.92	88	92	0.88	0.92	0.9	['PSD not valid?', 'PSD not valid?', 'low confidence PSD placement', 'low confidence PSD placement', 'T-bar and PSD not valid?', 'low confidence PSD placement']	rymert	826416797_combined_results_mb_retry.csv	826416797	45	50	42	50	21	21	0.9	1	0.84	1
ordishc-connection_validation-858030363_FBQ10c_C8_L-complete	858030363	FS2B	Roughly traced	119	625	49	50	43	50	0	21	22	43	25	25	25	21	25	22	0	50	0.98	1	0.86	1	0	84	88	0.84	0.88	84	88	0.84	0.88	0.86	[]	ogundeyio	858030363_combined_results_cx.csv	858030363	49	50	42	50	21	21	0.98	1	0.84	1
takemurasa-connection_validation-858047578_FB_Q7d_C3_R-complete	858047578	FC2D	Roughly traced	118	1224	48	50	39	49	0	18	21	38	25	25	25	18	25	21	0	50	0.96	1	0.78	0.98	0	72	84	0.72	0.84	72	84	0.72	0.84	0.76	[]	rymert	858047578_combined_results_cx.csv	858047578	48	50	45	49	21	24	0.96	1	0.9	0.98
ordishc-connection_validation-859960201_put_ADM10n(ABDL)_R-complete	859960201	ADM10n_b_pct	Roughly traced	221	1610	49	50	40	49	0	21	19	39	24	26	24	21	26	19	0	50	0.98	1	0.8	0.98	0	87.5	73.07692308	0.875	0.730769231	87.5	73.07692308	0.875	0.730769231	0.78	[]	ordishc	859960201_combined_results_mb.csv	859960201	49	50	41	49	21	20	0.98	1	0.82	0.98
rymert-connection_validation-863331646_AOTU_LAL(sgL3)_R_bilateral-complete	863331646	ADL06c_pct	Roughly traced	227	592	50	50	43	50	0	21	22	43	25	25	25	21	25	22	0	50	1	1	0.86	1	0	84	88	0.84	0.88	84	88	0.84	0.88	0.86	[]	ordishc	863331646_combined_results_mb_retry.csv	863331646	50	50	44	50	21	23	1	1	0.88	1
takemurasa-connection_validation-878725581_PB01a_R6-complete	878725581	PFNp_a	Roughly traced	54	238	48	50	43	50	3	20	23	43	25	25	25	20	25	23	3	50	0.96	1	0.86	1	0.06	80	92	0.8	0.92	80	92	0.8	0.92	0.86	['Low confidence PSD', 'Low confidence PSD', 'Low confidence PSD']	takemurasa	878725581_combined_results_cx.csv	878725581	48	50	45	50	21	24	0.96	1	0.9	1
lohffa-connection_validation-881527404_Delta0g-complete	881527404	Delta0L	Roughly traced	70	433	49	48	45	50	1	21	24	43	25	25	25	21	25	24	1	50	0.98	0.96	0.9	1	0.02	84	96	0.84	0.96	84	96	0.84	0.96	0.86	['PSD not valid?']	ogundeyio	881527404_combined_results_cx.csv	881527404	47	49	42	50	21	21	0.94	0.98	0.84	1
ordishc-connection_validation-882533209_PB12a(PFLC)_R1-complete	882533209	PFL1	Roughly traced	341	1565	46	50	38	49	0	20	18	37	25	25	25	20	25	18	0	50	0.92	1	0.76	0.98	0	80	72	0.8	0.72	80	72	0.8	0.72	0.74	[]	takemurasa	882533209_combined_results_cx.csv	882533209	46	50	42	49	21	21	0.92	1	0.84	0.98
smithc-connection_validation-884921084_FB_Q10a_C5_L-complete	884921084	FS2A	Roughly traced	73	394	50	50	44	50	0	20	24	44	25	25	25	20	25	24	1	50	1	1	0.88	1	0	80	96	0.8	0.96	80	96	0.8	0.96	0.88	["PSD glyph is on another T-bar, but it doesn't appear to be convergent to the marked T-bar"]	ogundeyio	884921084_combined_results_cx.csv	884921084	49	50	44	50	21	23	0.98	1	0.88	1
rymert-connection_validation-885598938_FB0108(aVT1)_R-complete	885598938	FB1J	Roughly traced	333	1524	48	49	47	49	1	25	22	46	26	24	26	25	24	22	3	50	0.96	0.98	0.94	0.98	0.02	96.15384615	91.66666667	0.961538462	0.916666667	96.15384615	91.66666667	0.961538462	0.916666667	0.92	['PSD on edge of cleft', 'T-bar glyph placed on glia', 'potential false merge on PSD']	smithc	885598938_combined_results_cx.csv	885598938	46	49	45	50	21	24	0.92	0.98	0.9	1
ogundeyio-connection_validation-885944105_FB09e(igL1)_R-complete	885944105	FB9B_d	Roughly traced	81	150	50	50	40	50	1	21	19	40	25	25	25	21	25	19	1	50	1	1	0.8	1	0.02	84	76	0.84	0.76	84	76	0.84	0.76	0.8	['Low Confidence psd']	ordishc	885944105_combined_results_cx.csv	885944105	49	50	42	50	21	21	0.98	1	0.84	1
rymert-connection_validation-886280235_FB09d(igL1)_R-complete	886280235	FB9B_d	Roughly traced	85	219	44	47	39	48	3	19	20	39	25	25	25	19	25	20	7	50	0.88	0.94	0.78	0.96	0.06	76	80	0.76	0.8	76	80	0.76	0.8	0.78	['T-bar placed on glia', 'No T-bar', 'Unsure if T-bar', 'PSD on edge of cleft', 'No T-bar', 'Suspect T-bar on hotknife', 'No T-bar']	ordishc	886280235_combined_results_cx.csv	886280235	45	47	42	49	21	21	0.9	0.94	0.84	0.98
ordishc-connection_validation-895441451_MBON26(B'2d)(aPBB)_R-complete	895441451	MBON26	Traced	1283	11522	50	50	41	50	0	18	23	41	25	25	25	18	25	23	0	50	1	1	0.82	1	0	72	92	0.72	0.92	72	92	0.72	0.92	0.82	[]	takemurasa	895441451_combined_results_mb_retry.csv	895441451	50	50	45	50	21	24	1	1	0.9	1
ogundeyio-connection_validation-909756319_FB_Q6a_C4_R-complete	909756319	FC1_a	Roughly traced	173	781	50	50	44	49	1	20	24	44	25	25	25	20	25	24	1	50	1	1	0.88	0.98	0.02	80	96	0.8	0.96	80	96	0.8	0.96	0.88	['Low Confidence psd']	rymert	909756319_combined_results_cx.csv	909756319	50	50	45	49	21	24	1	1	0.9	0.98
ordishc-connection_validation-915277883_Delta6n_01-complete	915277883	Delta6K	Roughly traced	348	1151	49	49	36	48	0	17	19	36	25	25	25	17	25	19	2	50	0.98	0.98	0.72	0.96	0	68	76	0.68	0.76	68	76	0.68	0.76	0.72	['needs merged', 'same body']	lohffa	915277883_combined_results_cx.csv	915277883	49	50	43	49	21	22	0.98	1	0.86	0.98
takemurasa-connection_validation-917311264_Delta0a-complete	917311264	Delta0A_a	Roughly traced	83	334	50	50	44	49	0	19	25	44	25	25	25	19	25	25	0	50	1	1	0.88	0.98	0	76	100	0.76	1	76	100	0.76	1	0.88	[]	takemurasa	917311264_combined_results_cx.csv	917311264	49	50	45	49	21	24	0.98	1	0.9	0.98
smithc-connection_validation-917450071_put_AVL02og(AVF1)_R-complete	917450071	AVL02q_d_pct	Roughly traced	218	1008	50	50	39	50	0	19	20	39	25	25	25	19	25	20	0	50	1	1	0.78	1	0	76	80	0.76	0.8	76	80	0.76	0.8	0.78	[]	smithc	917450071_combined_results_mb.csv	917450071	50	50	40	50	21	19	1	1	0.8	1
ogundeyio-connection_validation-942730172_(pCF5)_R-complete	942730172	PVM08b_pct	Roughly traced	447	1704	48	50	41	49	0	22	19	41	25	25	25	22	25	19	0	50	0.96	1	0.82	0.98	0	88	76	0.88	0.76	88	76	0.88	0.76	0.82	[]	takemurasa	942730172_combined_results_mb.csv	942730172	47	50	40	49	21	19	0.94	1	0.8	0.98
ordishc-connection_validation-945820710_(PLPF9)_R-complete	945820710	PVL20b_pct	Traced	424	552	47	50	41	50	0	22	19	41	25	25	25	22	25	19	0	50	0.94	1	0.82	1	0	88	76	0.88	0.76	88	76	0.88	0.76	0.82	[]	rymert	945820710_combined_results_mb.csv	945820710	47	50	42	50	21	21	0.94	1	0.84	1
ordishc-connection_validation-946658448_FB06q(lATL)_R-complete	946658448	FB6L	Roughly traced	204	1357	48	48	39	49	0	19	20	39	25	25	25	19	25	20	0	50	0.96	0.96	0.78	0.98	0	76	80	0.76	0.8	76	80	0.76	0.8	0.78	[]	rymert	946658448_combined_results_cx.csv	946658448	49	48	42	49	21	21	0.98	0.96	0.84	0.98
977223393_put_AVM14p	977223393	AVM14p_pct	Roughly traced	486	1258	48	50	40	50	1	21	19	40	25	25	25	21	24	19	1	50	0.96	1	0.8	1	0.02	84	76	0.84	0.76	84	76	0.84	0.791666667	0.8	['Low Confidence psd']	ogundeyio	977223393_combined_results_1000.csv	977223393	48	50	42	50	21	21	0.96	1	0.84	1
takemurasa-connection_validation-977338882_FB05Ba(SFS1)_R-complete	977338882	FB5Y	Roughly traced	523	1826	47	50	40	50	0	19	21	40	25	25	25	19	25	21	2	50	0.94	1	0.8	1	0	76	84	0.76	0.84	76	84	0.76	0.84	0.8	['Low confidence Tbar and PSD', 'Low confidence PSD']	ogundeyio	977338882_combined_results_cx.csv	977338882	47	50	41	49	21	20	0.94	1	0.82	0.98
lohffa-connection_validation-981362334_FB02n(SFS1)_R-complete	981362334	FB2G_a	Roughly traced	487	1191	50	50	43	46	0	20	23	39	25	25	25	20	25	23	0	50	1	1	0.86	0.92	0	80	92	0.8	0.92	80	92	0.8	0.92	0.78	[]	rymert	981362334_combined_results_cx.csv	981362334	50	50	44	47	21	23	1	1	0.88	0.94
smithc-connection_validation-1008024276_FB05p(aVT1)_R-complete	1008024276	FB5N	Roughly traced	499	1978	48	50	43	50	2	22	21	43	25	25	25	22	25	21	2	50	0.96	1	0.86	1	0.04	88	84	0.88	0.84	88	84	0.88	0.84	0.86	['Not sure T-bar glyph is on a valid T-bar', 'Not sure T-bar glyph is on a valid T-bar']	ordishc	1008024276_combined_results_cx.csv	1008024276	46	50	41	50	21	20	0.92	1	0.82	1
1012112513_FB05w	1012112513	FB5U	Roughly traced	246	1582	49	50	38	50	0	20	18	38	25	25	24	20	21	15	0	50	0.98	1	0.76	1	0	80	72	0.8	0.72	80	72	0.833333333	0.714285714	0.76	[]		1012112513_combined_results_1000.csv	1012112513	49	50	40	50	21	19	0.98	1	0.8	1
ogundeyio-connection_validation-1014802430_(MEF2)_R-complete	1014802430	PVM03d_pct	Roughly traced	450	1909	50	50	41	50	1	20	21	41	25	25	25	20	25	21	1	50	1	1	0.82	1	0.02	80	84	0.8	0.84	80	84	0.8	0.84	0.82	['Low Confidence psd']	ogundeyio	1014802430_combined_results_mb_retry.csv	1014802430	50	50	42	49	21	21	1	1	0.84	0.98
ordishc-connection_validation-1039400642_FB05q(igL1)_R-complete	1039400642	FB5O	Roughly traced	579	2382	50	50	44	50	0	21	23	44	25	25	25	21	25	23	0	50	1	1	0.88	1	0	84	92	0.84	0.92	84	92	0.84	0.92	0.88	[]	smithc	1039400642_combined_results_cx.csv	1039400642	49	49	45	50	21	24	0.98	0.98	0.9	1
ordishc-connection_validation-1039767525_FBQ7a_C6_R-complete	1039767525	FC2A	Roughly traced	290	2213	48	50	44	50	0	21	23	44	25	25	25	21	25	23	0	50	0.96	1	0.88	1	0	84	92	0.84	0.92	84	92	0.84	0.92	0.88	[]	ogundeyio	1039767525_combined_results_cx.csv	1039767525	48	50	46	50	21	25	0.96	1	0.92	1
ogundeyio-connection_validation-1073129213_Delta12b_L-complete	1073129213	Delta0C	Roughly traced	109	524	50	50	38	50	0	20	18	38	25	25	25	20	25	18	0	50	1	1	0.76	1	0	80	72	0.8	0.72	80	72	0.8	0.72	0.76	[]	ogundeyio	1073129213_combined_results_cx.csv	1073129213	50	50	41	50	21	20	1	1	0.82	1
ogundeyio-connection_validation-1079625867_put_ADM10f(ABDL)_R-complete	1079625867	CL-AtIb(c)1	Roughly traced	345	2398	50	50	37	50	5	20	17	37	25	25	25	20	25	17	5	50	1	1	0.74	1	0.1	80	68	0.8	0.68	80	68	0.8	0.68	0.74	['Low Confidence psd', 'Low Confidence psd', 'Low Confidence psd', 'Low Confidence psd', 'Low Confidence psd']	ogundeyio	1079625867_combined_results_mb.csv	1079625867	50	50	41	50	21	20	1	1	0.82	1
lohffa-connection_validation-1104832963_Delta6d_01-complete	1104832963	Delta6D	Roughly traced	315	2329	48	50	42	50	5	21	21	42	25	25	25	21	25	21	6	50	0.96	1	0.84	1	0.1	84	84	0.84	0.84	84	84	0.84	0.84	0.84	['Not sure if T-bar is valid', 'PSD not valid?', 'PSD not valid at this T-bar, but is at others nearby. ', 'PSD not valid?', 'Not sure if T-bar is valid', 'PSD not valid?']	lohffa	1104832963_combined_results_cx.csv	1104832963	48	50	43	50	21	22	0.96	1	0.86	1
takemurasa-connection_validation-1106857669_FB04b(NO2)(aVT1)_R-complete	1106857669	FB4B	Roughly traced	862	4241	50	50	40	50	0	20	20	40	25	25	25	20	25	20	3	50	1	1	0.8	1	0	80	80	0.8	0.8	80	80	0.8	0.8	0.8	['Low confidence PSD', 'Low confidence PSD', 'Low confidence Tbar and PSD']	lohffa	1106857669_combined_results_cx.csv	1106857669	50	50	45	50	21	24	1	1	0.9	1
takemurasa-connection_validation-1134729441_(PLPF2)_R-complete	1134729441	PVL05e_pct	Roughly traced	463	1478	48	50	36	49	2	18	18	36	25	25	25	18	25	18	3	50	0.96	1	0.72	0.98	0.04	72	72	0.72	0.72	72	72	0.72	0.72	0.72	['Split todo placed', 'Low confident PSD', 'Low confident PSD']	ordishc	1134729441_combined_results_mb.csv	1134729441	48	50	42	49	21	21	0.96	1	0.84	0.98
1135777647_put_AVL03zD	1135777647	AVL03lj_pct	Roughly traced	306	1171	48	50	43	50	1	19	24	43	25	25	22	18	22	21	1	50	0.96	1	0.86	1	0.02	76	96	0.76	0.96	76	96	0.818181818	0.954545455	0.86	['Unsure if PSD makes it in cleft']		1135777647_combined_results_1000.csv	1135777647	48	50	45	50	21	24	0.96	1	0.9	1
ordishc-connection_validation-1135898324_FBQ9_C3_R-complete	1135898324	FS1B	Roughly traced	99	995	45	50	43	50	0	19	24	43	25	25	25	19	25	24	0	50	0.9	1	0.86	1	0	76	96	0.76	0.96	76	96	0.76	0.96	0.86	[]	ogundeyio	1135898324_combined_results_cx.csv	1135898324	46	50	44	50	21	23	0.92	1	0.88	1
smithc-connection_validation-1138587910_(PLBDL2)_R-complete	1138587910	SpVeLC	Roughly traced	1401	4816	50	50	41	49	0	18	23	40	25	25	25	18	25	23	1	50	1	1	0.82	0.98	0	72	92	0.72	0.92	72	92	0.72	0.92	0.8	['PSD glyph is on the same body as the T-bar glyph']	ordishc	1138587910_combined_results_mb_retry.csv	1138587910	50	50	45	49	21	24	1	1	0.9	0.98
ordishc-connection_validation-1198658803_Delta6g_01-complete	1198658803	Delta6F_b	Roughly traced	402	2906	49	50	43	50	0	21	22	43	25	25	25	21	25	22	0	50	0.98	1	0.86	1	0	84	88	0.84	0.88	84	88	0.84	0.88	0.86	[]	ogundeyio	1198658803_combined_results_cx.csv	1198658803	49	50	43	50	21	22	0.98	1	0.86	1
ordishc-connection_validation-1201296549_(MEF1)_R-complete	1201296549	SpLC-SpIb(c)	Roughly traced	641	2961	47	50	41	48	0	21	20	39	25	25	25	21	25	20	0	50	0.94	1	0.82	0.96	0	84	80	0.84	0.8	84	80	0.84	0.8	0.78	[]	ordishc	1201296549_combined_results_mb.csv	1201296549	47	50	44	50	21	23	0.94	1	0.88	1
lohffa-connection_validation-1202470836_PAM07(y4<y1y2)_L-complete	1202470836	PAM07	Roughly traced	275	807	50	50	46	50	3	23	23	46	25	25	25	23	25	23	6	50	1	1	0.92	1	0.06	92	92	0.92	0.92	92	92	0.92	0.92	0.92	['low confidence PSD placement', 'PSD not valid?', 'PSD not valid?', 'PSD not valid?', 'low confidence PSD placement', 'low confidence PSD placement']	lohffa	1202470836_combined_results_mb_retry.csv	1202470836	50	50	45	50	21	24	1	1	0.9	1
rymert-connection_validation-1219756158_PB01a_R9-complete	1219756158	PFNp_a	Roughly traced	76	288	49	50	44	49	1	20	24	43	25	25	25	20	25	24	1	50	0.98	1	0.88	0.98	0.02	80	96	0.8	0.96	80	96	0.8	0.96	0.86	['PSD on edge of cleft']	smithc	1219756158_combined_results_cx.csv	1219756158	49	50	44	49	21	23	0.98	1	0.88	0.98
takemurasa-connection_validation-1220800405_FB06r(lATL)_R-complete	1220800405	FB6M	Roughly traced	402	1348	48	49	40	50	0	20	20	40	25	25	25	20	25	20	3	50	0.96	0.98	0.8	1	0	80	80	0.8	0.8	80	80	0.8	0.8	0.8	['Need to split at (32476, 23734, 18010) or move Tbar on 5813050747', 'Low confidence Tbar and PSD', 'Low confidence Tbar and PSD']	ordishc	1220800405_combined_results_cx.csv	1220800405	49	50	41	50	21	20	0.98	1	0.82	1
lohffa-connection_validation-1260685629_Delta12c_L-complete	1260685629	Delta0E	Roughly traced	121	760	50	50	44	50	0	23	21	44	25	25	25	23	25	21	3	50	1	1	0.88	1	0	92	84	0.92	0.84	92	84	0.92	0.84	0.88	['PSD not valid', 'PSD not valid', 'PSD not valid']	ogundeyio	1260685629_combined_results_cx.csv	1260685629	49	50	45	49	21	24	0.98	1	0.9	0.98
takemurasa-connection_validation-1261044051_FB_Q8_C1_R-complete	1261044051	FC3	Roughly traced	184	632	47	50	42	50	0	22	20	42	25	25	25	22	25	20	1	50	0.94	1	0.84	1	0	88	80	0.88	0.8	88	80	0.88	0.8	0.84	['Low confidence PSD']	ordishc	1261044051_combined_results_cx.csv	1261044051	45	50	40	50	21	19	0.9	1	0.8	1
takemurasa-connection_validation-1261432168_R3dA(ring)(igL2)_R-complete	1261432168	R3d_a	Traced	328	1088	44	50	40	50	2	21	19	40	25	25	25	21	25	19	2	50	0.88	1	0.8	1	0.04	84	76	0.84	0.76	84	76	0.84	0.76	0.8	['Low confidence Tbar', 'Low confidence Tbar']	rymert	1261432168_combined_results_cx.csv	1261432168	44	50	41	50	21	20	0.88	1	0.82	1
ordishc-connection_validation-1280107204_FBQ6a_C1_R-complete	1280107204	FC1_a	Roughly traced	182	746	47	50	40	50	0	22	18	40	25	25	25	22	25	18	0	50	0.94	1	0.8	1	0	88	72	0.88	0.72	88	72	0.88	0.72	0.8	[]	ordishc	1280107204_combined_results_cx.csv	1280107204	48	50	40	49	21	19	0.96	1	0.8	0.98
ogundeyio-connection_validation-1283371992_LC28b-complete	1283371992	LC28b	Roughly traced	135	248	48	50	41	49	2	21	20	41	25	25	25	21	25	20	4	50	0.96	1	0.82	0.98	0.04	84	80	0.84	0.8	84	80	0.84	0.8	0.82	['Low Confidence Tbar', 'Low Confidence psd', 'Slight False merge', 'Low Confidence psd']	ogundeyio	1283371992_combined_results_mb_retry.csv	1283371992	49	50	40	49	21	19	0.98	1	0.8	0.98
takemurasa-connection_validation-1310494524_Delta0c-complete	1310494524	Delta0E	Roughly traced	146	1056	48	50	39	50	0	19	20	39	25	25	25	19	25	20	0	50	0.96	1	0.78	1	0	76	80	0.76	0.8	76	80	0.76	0.8	0.78	[]	ordishc	1310494524_combined_results_cx.csv	1310494524	48	50	43	50	21	22	0.96	1	0.86	1
takemurasa-connection_validation-1311168293_Delta0f-complete	1311168293	Delta0J	Roughly traced	128	790	50	50	41	50	0	20	21	41	25	25	25	20	25	21	0	50	1	1	0.82	1	0	80	84	0.8	0.84	80	84	0.8	0.84	0.82	[]	lohffa	1311168293_combined_results_cx.csv	1311168293	50	50	43	50	21	22	1	1	0.86	1
smithc-connection_validation-1323156554_R3pA(ring)(igL2)_R-complete	1323156554	R3p_a	Traced	335	1065	47	50	37	50	3	21	16	37	25	25	25	21	25	16	3	50	0.94	1	0.74	1	0.06	84	64	0.84	0.64	84	64	0.84	0.64	0.74	[' Not sure T-bar glyph is on a valid T-bar', 'Not sure T-bar glyph is on a valid T-bar', 'Not sure T-bar glyph is on a valid T-bar']	ogundeyio	1323156554_combined_results_cx.csv	1323156554	48	50	38	50	21	17	0.96	1	0.76	1
smithc-connection_validation-1350803100_PB01a_R5-complete	1350803100	PFNp_a	Roughly traced	87	260	45	48	40	49	4	20	20	40	25	25	25	20	25	20	4	50	0.9	0.96	0.8	0.98	0.08	80	80	0.8	0.8	80	80	0.8	0.8	0.8	['Not sure T-bar glyph is on a valid T-bar', 'Synapse is obscured by hotknife stitch', 'Not sure T-bar glyph is on a valid T-bar', 'Not sure T-bar glyph is on a valid T-bar']	ordishc	1350803100_combined_results_cx.csv	1350803100	46	48	43	49	21	22	0.92	0.96	0.86	0.98
lohffa-connection_validation-1352077058_(pIBF1)_R-complete	1352077058	PVM02b_pct	Roughly traced	560	2955	47	50	40	49	3	21	19	39	25	25	25	21	25	19	4	50	0.94	1	0.8	0.98	0.06	84	76	0.84	0.76	84	76	0.84	0.76	0.78	['PSD not valid?', 'PSD not valid?', 'Multiple T-bars', 'PSD not valid?']	lohffa	1352077058_combined_results_mb.csv	1352077058	47	50	43	49	21	22	0.94	1	0.86	0.98
1468350445_put_PVL13a	1468350445	PVL13a_pct	Roughly traced	300	619	49	50	41	49	5	19	22	40	25	25	22	18	23	21	5	50	0.98	1	0.82	0.98	0.1	76	88	0.76	0.88	76	88	0.818181818	0.913043478	0.8	['Contains false merge at (18287, 13462, 22386). After split psd should merge to RT 5813082237 at (18271, 13473, 22386) ', 'Low Confidence psd', 'Low Confidence psd', 'Low Confidence psd', 'Low Confidence psd']		1468350445_combined_results_1000.csv	1468350445	50	50	44	50	21	23	1	1	0.88	1
1596199055_put_PVL12f	1596199055	PVL12f_pct	Roughly traced	402	126	41	45	41	50	1	23	18	41	25	25	23	23	20	18	11	50	0.82	0.9	0.82	1	0.02	92	72	0.92	0.72	92	72	1	0.9	0.82	['PSD glyph has been removed.', 'PSD glyph has been removed.', 'PSD glyph has been removed.', 'T-bar is actually PSD', 'low confidence PSD placement', 'T-bar is actually PSD ', 'PSD glyph has been removed.', 'PSD not valid?', 'PSD glyph has been removed.', 'PSD glyph has been removed.', 'PSD glyph has been removed.']		1596199055_combined_results_1000.csv	1596199055	46	50	41	50	21	20	0.92	1	0.82	1
ogundeyio-connection_validation-1628743785_PB01a_R3-complete	1628743785	PFNp_a	Roughly traced	64	252	50	50	41	50	5	21	20	41	25	25	25	21	25	20	5	50	1	1	0.82	1	0.1	84	80	0.84	0.8	84	80	0.84	0.8	0.82	['Low Confidence psd', 'Low Confidence psd', 'Low Confidence psd', 'Low Confidence psd', 'Low Confidence psd']	ogundeyio	1628743785_combined_results_cx.csv	1628743785	50	50	42	50	21	21	1	1	0.84	1
rymert-connection_validation-5812980473_put_ADL07i(dlLHT)_R-complete	5812980473	ADL07i_pct	Roughly traced	563	625	46	49	40	48	1	21	19	38	25	25	25	21	25	19	2	50	0.92	0.98	0.8	0.96	0.02	84	76	0.84	0.76	84	76	0.84	0.76	0.76	['Unsure if T-bar', 'Hotknife, PSD needs splitting']	takemurasa	5812980473_combined_results_mb.csv	5812980473	47	50	40	49	21	19	0.94	1	0.8	0.98
lohffa-connection_validation-5812980884_(SIPT1)_R-complete	5812980884	PDM07op_pct	Roughly traced	902	2176	47	50	45	50	1	22	23	45	25	25	25	22	25	23	2	50	0.94	1	0.9	1	0.02	88	92	0.88	0.92	88	92	0.88	0.92	0.9	['low confidence PSD placement', 'PSD not valid?']	rymert	5812980884_combined_results_mb.csv	5812980884	47	50	44	50	21	23	0.94	1	0.88	1
lohffa-connection_validation-5812981543_MBON17_like(a'2a'3)(SFS1)_R-complete	5812981543	MBON17-like	Traced	291	2913	46	47	45	50	1	21	24	43	25	25	25	21	25	24	3	50	0.92	0.94	0.9	1	0.02	84	96	0.84	0.96	84	96	0.84	0.96	0.86	['PSD not valid?', 'low confidence PSD placement', 'T-bar and PSD not valid?']	ordishc	5812981543_combined_results_mb.csv	5812981543	46	48	46	50	21	25	0.92	0.96	0.92	1
ordishc-connection_validation-5812983522_PAM08a(y4)_L-complete	5812983522	PAM07	Roughly traced	544	2413	49	50	46	50	0	21	25	46	25	25	25	21	25	25	0	50	0.98	1	0.92	1	0	84	100	0.84	1	84	100	0.84	1	0.92	[]	smithc	5812983522_combined_results_mb.csv	5812983522	46	50	44	50	21	23	0.92	1	0.88	1
ogundeyio-connection_validation-5812986772_FB_Q12a(AB)_C2_R-complete	5812986772	FS4A	Roughly traced	57	282	50	50	43	49	2	21	22	42	25	25	25	21	25	22	2	50	1	1	0.86	0.98	0.04	84	88	0.84	0.88	84	88	0.84	0.88	0.84	['Low Confidence psd', 'Low Confidence psd']	lohffa	5812986772_combined_results_cx.csv	5812986772	50	50	43	49	21	22	1	1	0.86	0.98
ordishc-connection_validation-5813011125_FB02w(aVT1)_R-complete	5813011125	FB2L	Roughly traced	355	1673	50	50	45	50	0	23	22	45	25	25	25	23	25	22	0	50	1	1	0.9	1	0	92	88	0.92	0.88	92	88	0.92	0.88	0.9	[]	smithc	5813011125_combined_results_cx.csv	5813011125	49	50	44	49	21	23	0.98	1	0.88	0.98
ordishc-connection_validation-5813014688_FBQ7a_C5_R-complete	5813014688	FC2A	Roughly traced	242	2029	50	50	45	50	0	21	24	45	25	25	25	21	25	24	0	50	1	1	0.9	1	0	84	96	0.84	0.96	84	96	0.84	0.96	0.9	[]	ordishc	5813014688_combined_results_cx.csv	5813014688	50	50	45	50	21	24	1	1	0.9	1
ogundeyio-connection_validation-5813020735_FB07b(SFS1)_R-complete	5813020735	FB7A	Roughly traced	725	1312	47	50	39	50	2	20	19	39	25	25	25	20	25	19	3	50	0.94	1	0.78	1	0.04	80	76	0.8	0.76	80	76	0.8	0.76	0.78	['Low Confidence psd', 'Low Confidence psd', 'Low Confidence psd']	rymert	5813020735_combined_results_cx.csv	5813020735	46	50	40	50	21	19	0.92	1	0.8	1
ordishc-connection_validation-5813021247_FB05e(igL1)_R-complete	5813021247	FB5E	Roughly traced	621	2681	50	50	42	50	0	19	23	42	25	25	25	19	25	23	0	50	1	1	0.84	1	0	76	92	0.76	0.92	76	92	0.76	0.92	0.84	[]	lohffa	5813021247_combined_results_cx.csv	5813021247	50	50	45	50	21	24	1	1	0.9	1
ordishc-connection_validation-5813021602_CRESMP(aSLPF1)_R-complete	5813021602	PDL06oz_pct	Roughly traced	1065	5318	48	50	37	50	0	19	18	37	25	25	25	19	25	18	0	50	0.96	1	0.74	1	0	76	72	0.76	0.72	76	72	0.76	0.72	0.74	[]	rymert	5813021602_combined_results_mb_retry.csv	5813021602	49	50	42	50	21	21	0.98	1	0.84	1
ogundeyio-connection_validation-5813021632_put_ADL28i(aSIP2)_R-complete	5813021632	ADL28i_pct	Roughly traced	573	789	50	50	38	50	4	21	17	38	25	25	25	21	25	17	4	50	1	1	0.76	1	0.08	84	68	0.84	0.68	84	68	0.84	0.68	0.76	['Low Confidence psd', 'Low Confidence psd', 'Low Confidence psd', 'Low Confidence psd']	rymert	5813021632_combined_results_mb_retry.csv	5813021632	50	50	39	50	21	18	1	1	0.78	1
rymert-connection_validation-5813022792_SPS_LAL(SPSF)_R-complete	5813022792	PVL16a_pct	Roughly traced	606	543	50	50	41	50	2	19	22	41	25	25	25	19	25	22	2	50	1	1	0.82	1	0.04	76	88	0.76	0.88	76	88	0.76	0.88	0.82	['Unsure if T-bar', 'Unsure if T-bar']	rymert	5813022792_combined_results_mb_retry.csv	5813022792	50	49	43	50	21	22	1	0.98	0.86	1
takemurasa-connection_validation-5813037866_Delta6j_01-complete	5813037866	Delta6H_b	Roughly traced	350	3185	50	50	42	50	0	20	22	42	25	25	25	20	25	22	0	50	1	1	0.84	1	0	80	88	0.8	0.88	80	88	0.8	0.88	0.84	[]	ordishc	5813037866_combined_results_cx.csv	5813037866	50	50	45	50	21	24	1	1	0.9	1
takemurasa-connection_validation-5813039999_FB_Q10a_C7_L-complete	5813039999	FS2A	Roughly traced	65	481	50	50	42	48	0	19	23	41	25	25	25	19	25	23	2	50	1	1	0.84	0.96	0	76	92	0.76	0.92	76	92	0.76	0.92	0.82	['Split needed at (31830, 25797, 11954)', 'Split needed at (21215, 26003, 14154)']	ordishc	5813039999_combined_results_cx.csv	5813039999	50	50	44	48	21	23	1	1	0.88	0.96
ordishc-connection_validation-5813049380_put_PDL05b(SFS1)_R-complete	5813049380	PDL05b_pct	Roughly traced	1233	3198	50	49	41	49	0	19	22	41	25	25	25	19	25	22	0	50	1	0.98	0.82	0.98	0	76	88	0.76	0.88	76	88	0.76	0.88	0.82	[]	takemurasa	5813049380_combined_results_mb_retry.csv	5813049380	50	49	44	49	21	23	1	0.98	0.88	0.98
rymert-connection_validation-5813049824_FB06g(SFS1)_R-complete	5813049824	FB6E	Roughly traced	1326	2796	47	50	38	50	1	21	17	38	25	25	25	21	25	17	2	50	0.94	1	0.76	1	0.02	84	68	0.84	0.68	84	68	0.84	0.68	0.76	['hotknife', 'PSD close to, but not in cleft']	lohffa	5813049824_combined_results_cx.csv	5813049824	48	50	40	50	21	19	0.96	1	0.8	1
ogundeyio-connection_validation-5813050455_DNp32(LEF)_R-complete	5813050455	DNp32	Roughly traced	3049	6705	50	50	35	50	1	19	16	35	25	25	25	19	25	16	2	50	1	1	0.7	1	0.02	76	64	0.76	0.64	76	64	0.76	0.64	0.7	['Low Confidence psd', 'Low Confidence psd']	lohffa	5813050455_combined_results_mb_retry.csv	5813050455	50	50	37	50	21	16	1	1	0.74	1
rymert-connection_validation-5813054996_put_ADM06e(mAOTU3)_R-complete	5813054996	ADM06r_pct	Roughly traced	221	800	48	50	43	50	1	22	21	43	25	25	25	22	25	21	1	50	0.96	1	0.86	1	0.02	88	84	0.88	0.84	88	84	0.88	0.84	0.86	['Unsure if PSD in cleft']	takemurasa	5813054996_combined_results_mb_retry.csv	5813054996	48	50	43	50	21	22	0.96	1	0.86	1
ordishc-connection_validation-5813057169_FB06m(SFS1)_R-complete	5813057169	FB6C_b	Roughly traced	1023	1537	48	50	44	49	0	22	22	43	25	25	25	22	25	22	0	50	0.96	1	0.88	0.98	0	88	88	0.88	0.88	88	88	0.88	0.88	0.86	[]	takemurasa	5813057169_combined_results_cx.csv	5813057169	48	50	44	50	21	23	0.96	1	0.88	1
smithc-connection_validation-5813060787_FB02b(aSMP)_R-complete	5813060787	FB2B_a	Traced	794	2288	47	50	40	50	3	22	18	40	25	25	25	22	25	18	3	50	0.94	1	0.8	1	0.06	88	72	0.88	0.72	88	72	0.88	0.72	0.8	['Not sure T-bar glyph is on a valid T-bar', 'Not sure T-bar glyph is on a valid T-bar', 'Not sure T-bar glyph on a valid T-bar']	ordishc	5813060787_combined_results_cx.csv	5813060787	47	50	40	50	21	19	0.94	1	0.8	1
ordishc-connection_validation-5813063239_mPNX(A11)_R-complete	5813063239	VP multi adPN mALT	Roughly traced	1296	1327	46	50	31	50	0	16	15	31	25	25	25	16	25	15	0	50	0.92	1	0.62	1	0	64	60	0.64	0.6	64	60	0.64	0.6	0.62	[]	ogundeyio	5813063239_combined_results_mb_retry.csv	5813063239	45	50	37	50	21	16	0.9	1	0.74	1
ogundeyio-connection_validation-5813078603_(pPBB2)_R-complete	5813078603	PVM16b_pct	Roughly traced	1020	2495	48	50	34	50	0	21	13	34	25	25	25	21	25	13	0	50	0.96	1	0.68	1	0	84	52	0.84	0.52	84	52	0.84	0.52	0.68	[]	rymert	5813078603_combined_results_mb.csv	5813078603	48	50	37	49	21	16	0.96	1	0.74	0.98
ordishc-connection_validation-5813083779_put_ADM07x(aSMPB)_R-complete	5813083779	ADM07x_pct	Roughly traced	1155	7988	49	50	43	50	0	19	24	43	25	25	25	19	25	24	0	50	0.98	1	0.86	1	0	76	96	0.76	0.96	76	96	0.76	0.96	0.86	[]	ordishc	5813083779_combined_results_mb_retry.csv	5813083779	50	50	45	50	21	24	1	1	0.9	1
ordishc-connection_validation-5813088641_FBQ7a_C8_R-complete	5813088641	FC2A	Roughly traced	239	2166	48	50	45	50	0	22	23	45	25	25	25	22	25	23	0	50	0.96	1	0.9	1	0	88	92	0.88	0.92	88	92	0.88	0.92	0.9	[]	smithc	5813088641_combined_results_cx.csv	5813088641	47	50	44	50	21	23	0.94	1	0.88	1
rymert-connection_validation-5813089157_put_ADM12d(AMcir1)_R-complete	5813089157	ADM12d_pct	Traced	1266	3550	50	50	46	50	0	23	23	46	25	25	25	23	25	23	0	50	1	1	0.92	1	0	92	92	0.92	0.92	92	92	0.92	0.92	0.92	[]	takemurasa	5813089157_combined_results_mb.csv	5813089157	49	50	42	50	21	21	0.98	1	0.84	1
ogundeyio-connection_validation-5813091744_KCaB_p-complete	5813091744	KCab-p	Roughly traced	285	632	50	50	39	50	3	17	22	39	25	25	25	17	25	22	4	50	1	1	0.78	1	0.06	68	88	0.68	0.88	68	88	0.68	0.88	0.78	['Low Confidence psd', 'Low Confidence psd', 'Low Confidence psd', 'Low Confidence psd']	rymert	5813091744_combined_results_mb.csv	5813091744	50	50	43	50	21	22	1	1	0.86	1
rymert-connection_validation-296139882_put_ADM04w(AMDF)_R-complete	296139882	ADM04ok_pct	Roughly traced	1813	6558	49	47	45	48	0	22	23	45	25	25	25	22	25	23	0	50	0.98	0.94	0.9	0.96	0	88	92	0.88	0.92	88	92	0.88	0.92	0.9	[]	smithc	296139882_combined_results_mb_retry.csv	296139882	49	47	45	48	22	23	0.98	0.94	0.9	0.96
ordishc-connection_validation-296160764_FB08k(igL1)_R-complete	296160764	FB8E	Roughly traced	229	694	47	50	43	50	0	21	22	43	25	25	25	21	25	22	0	50	0.94	1	0.86	1	0	84	88	0.84	0.88	84	88	0.84	0.88	0.86	[]	rymert	296160764_combined_results_cx.csv	296160764	48	50	43	50	22	21	0.96	1	0.86	1
takemurasa-connection_validation-296497316_FB09f(aVT1)_R-complete	296497316	SAF	Roughly traced	131	657	49	50	41	50	1	23	18	41	25	25	25	23	25	18	1	50	0.98	1	0.82	1	0.02	92	72	0.92	0.72	92	72	0.92	0.72	0.82	['Low confidence PSD']	lohffa	296497316_combined_results_cx.csv	296497316	49	50	43	50	22	21	0.98	1	0.86	1
ogundeyio-connection_validation-297929815_(pSM4)_R-complete	297929815	PDM15f_pct	Roughly traced	124	354	48	50	40	50	6	21	19	40	25	25	25	21	25	19	6	50	0.96	1	0.8	1	0.12	84	76	0.84	0.76	84	76	0.84	0.76	0.8	['Low Confidence psd', 'Low Confidence psd', 'Low Confidence psd', 'Low Confidence psd', 'Low Confidence psd', 'Low Confidence psd']	smithc	297929815_combined_results_mb.csv	297929815	48	50	41	50	22	19	0.96	1	0.82	1
ordishc-connection_validation-328861282_put_ADL01n(LBDL2)_R-complete	328861282	ADL01oe_pct	Roughly traced	2571	12609	49	50	46	48	0	22	24	44	25	25	25	22	25	24	0	50	0.98	1	0.92	0.96	0	88	96	0.88	0.96	88	96	0.88	0.96	0.88	[]	lohffa	328861282_combined_results_mb.csv	328861282	50	50	46	49	22	24	1	1	0.92	0.98
lohffa-connection_validation-331662710_PPL106(a3)(SFS1)_R-complete	331662710	PPL106	Roughly traced	1814	9955	50	50	43	50	0	21	22	43	25	25	25	21	25	22	0	50	1	1	0.86	1	0	84	88	0.84	0.88	84	88	0.84	0.88	0.86	[]	ordishc	331662710_combined_results_mb.csv	331662710	50	50	45	50	22	23	1	1	0.9	1
ordishc-connection_validation-357569231_FBQ12a_C9_L-complete	357569231	FS4A	Roughly traced	67	134	50	50	44	49	0	22	22	43	25	25	25	22	25	22	0	50	1	1	0.88	0.98	0	88	88	0.88	0.88	88	88	0.88	0.88	0.86	[]	lohffa	357569231_combined_results_cx.csv	357569231	50	50	46	50	22	24	1	1	0.92	1
360310976_put_ADM01a	360310976	ADM01a_pct	Roughly traced	313	1519	48	50	47	50	0	22	25	47	25	25	21	18	24	24	0	50	0.96	1	0.94	1	0	88	100	0.88	1	88	100	0.857142857	1	0.94	[]		360310976_combined_results_1000.csv	360310976	48	50	47	50	22	25	0.96	1	0.94	1
361312808_put_PDM22f	361312808	PDM22ola_pct	Roughly traced	2849	6523	49	50	37	50	0	20	17	37	25	25	21	19	23	17	0	50	0.98	1	0.74	1	0	80	68	0.8	0.68	80	68	0.904761905	0.739130435	0.74	[]		361312808_combined_results_1000.csv	361312808	50	50	42	50	22	20	1	1	0.84	1
rymert-connection_validation-389205204_put_AVL07s(LEA1)_R-complete	389205204	AVL07s_pct	Roughly traced	411	428	46	50	38	50	1	20	18	38	25	25	25	20	25	18	2	50	0.92	1	0.76	1	0.02	80	72	0.8	0.72	80	72	0.8	0.72	0.76	['autapse', 'grayscale unclear']	lohffa	389205204_combined_results_mb_retry.csv	389205204	49	50	42	50	22	20	0.98	1	0.84	1
lohffa-connection_validation-391631218_put_ADL16d(LBDL8)_R-complete	391631218	ADL16d_pct	Roughly traced	421	897	47	49	44	50	0	22	22	44	25	25	25	22	25	22	3	50	0.94	0.98	0.88	1	0	88	88	0.88	0.88	88	88	0.88	0.88	0.88	['low confidence PSD placement', 'low confidence PSD placement', 'low confidence PSD placement']	ogundeyio	391631218_combined_results_mb.csv	391631218	47	49	45	50	22	23	0.94	0.98	0.9	1
rymert-connection_validation-422725634_MBON06(B1>a)(igL2)_L-complete	422725634	MBON06	Roughly traced	1356	21000	49	49	45	49	0	22	23	45	25	25	25	22	25	23	0	50	0.98	0.98	0.9	0.98	0	88	92	0.88	0.92	88	92	0.88	0.92	0.9	[]	takemurasa	422725634_combined_results_mb.csv	422725634	50	49	46	49	22	24	1	0.98	0.92	0.98
ordishc-connection_validation-449241371_put_ADL07h(dlLHT)_R-complete	449241371	ADL07oo_pct	Roughly traced	1005	1473	50	50	44	48	0	22	22	43	25	25	25	22	25	22	0	50	1	1	0.88	0.96	0	88	88	0.88	0.88	88	88	0.88	0.88	0.86	[]	ogundeyio	449241371_combined_results_mb.csv	449241371	49	50	44	48	22	22	0.98	1	0.88	0.96
450267976_put_ADL10i	450267976	ADL10i_pct	Roughly traced	146	432	47	50	47	50	1	23	24	47	25	25	24	22	24	23	3	50	0.94	1	0.94	1	0.02	92	96	0.92	0.96	92	96	0.916666667	0.958333333	0.94	['PSD not valid?', 'low confidence PSD placement', 'low confidence PSD placement']		450267976_combined_results_1000.csv	450267976	47	50	46	50	22	24	0.94	1	0.92	1
453087379_put_ADL08c	453087379	ADL08c_pct	Roughly traced	666	2789	49	49	43	49	1	21	22	43	25	25	24	20	22	20	1	50	0.98	0.98	0.86	0.98	0.02	84	88	0.84	0.88	84	88	0.833333333	0.909090909	0.86	['Bad seg. Unsure if T-bar']		453087379_combined_results_1000.csv	453087379	49	49	46	49	22	24	0.98	0.98	0.92	0.98
lohffa-connection_validation-455431209_PAM10(B1)(aSMP)_R-complete	455431209	PAM10	Traced	522	2526	48	50	42	50	3	22	20	41	25	25	25	22	25	20	4	50	0.96	1	0.84	1	0.06	88	80	0.88	0.8	88	80	0.88	0.8	0.82	['T-bar and PSD not valid?', 'PSD not valid?', 'low confidence PSD placement', 'T-bar not valid?']	lohffa	455431209_combined_results_mb_retry.csv	455431209	48	50	43	50	22	21	0.96	1	0.86	1
482050067_put_PDM08t	482050067	FB9C_b	Roughly traced	69	318	49	50	40	50	0	21	19	40	25	25	22	19	22	18	0	50	0.98	1	0.8	1	0	84	76	0.84	0.76	84	76	0.863636364	0.818181818	0.8	[]		482050067_combined_results_1000.csv	482050067	49	50	43	50	22	21	0.98	1	0.86	1
ogundeyio-connection_validation-484350664_put_ADL07x(dlLHT)_R-complete	484350664	ADL07x_a_pct	Roughly traced	178	189	47	50	36	50	3	20	16	36	25	25	25	20	25	16	3	50	0.94	1	0.72	1	0.06	80	64	0.8	0.64	80	64	0.8	0.64	0.72	['Low Confidence psd', 'Low Confidence psd', 'Low Confidence psd']	rymert	484350664_combined_results_mb.csv	484350664	47	50	38	50	22	16	0.94	1	0.76	1
rymert-connection_validation-486544396_put_ADL27b(dAOTU4)_R-complete	486544396	ADL27b_pct	Roughly traced	1109	3555	47	49	41	50	1	20	21	40	25	25	25	20	25	21	1	50	0.94	0.98	0.82	1	0.02	80	84	0.8	0.84	80	84	0.8	0.84	0.8	['PSD on edge of cleft']	ordishc	486544396_combined_results_mb_retry.csv	486544396	48	49	44	50	22	22	0.96	0.98	0.88	1
takemurasa-connection_validation-510680365_(pSIPB1)_R-complete	510680365	PDM11ob_pct	Roughly traced	312	1015	46	50	41	50	0	21	20	41	25	25	25	21	25	20	0	50	0.92	1	0.82	1	0	84	80	0.84	0.8	84	80	0.84	0.8	0.82	[]	lohffa	510680365_combined_results_mb.csv	510680365	47	50	43	50	22	21	0.94	1	0.86	1
ordishc-connection_validation-510987433_put_ADL07a(dlLHT)_R-complete	510987433	ADL07a_pct	Roughly traced	527	1781	49	49	43	50	0	20	23	43	24	26	24	20	26	23	1	50	0.98	0.98	0.86	1	0	83.33333333	88.46153846	0.833333333	0.884615385	83.33333333	88.46153846	0.833333333	0.884615385	0.86	['HK']	ogundeyio	510987433_combined_results_mb_retry.csv	510987433	50	50	46	50	22	24	1	1	0.92	1
rymert-connection_validation-517854468_MBON19(a2p3p)(SFS3)_R_001-complete	517854468	MBON19	Roughly traced	310	1869	47	50	44	50	0	21	23	44	25	25	25	21	25	23	0	50	0.94	1	0.88	1	0	84	92	0.84	0.92	84	92	0.84	0.92	0.88	[]	ogundeyio	517854468_combined_results_mb.csv	517854468	47	50	45	50	22	23	0.94	1	0.9	1
517885151_put_PDL18z	517885151	PDL18z_pct	Roughly traced	247	626	48	50	36	50	1	21	15	36	25	25	24	21	22	14	1	50	0.96	1	0.72	1	0.02	84	60	0.84	0.6	84	60	0.875	0.636363636	0.72	['Low Confidence psd']		517885151_combined_results_1000.csv	517885151	48	50	41	50	22	19	0.96	1	0.82	1
lohffa-connection_validation-518930199_MBON35(y2)(aSMP)_R-complete	518930199	MBON35	Roughly traced	1746	21226	50	50	47	50	3	22	25	47	25	25	25	22	25	25	3	50	1	1	0.94	1	0.06	88	100	0.88	1	88	100	0.88	1	0.94	['PSD not valid?', 'PSD not valid?', 'T-bar not valid?']	ogundeyio	518930199_combined_results_mb.csv	518930199	50	50	47	50	22	25	1	1	0.94	1
541956768_put_PDL08oh	541956768	PDL08ol_pct	Roughly traced	221	367	50	50	37	50	0	19	18	37	25	25	20	17	21	17	0	50	1	1	0.74	1	0	76	72	0.76	0.72	76	72	0.85	0.80952381	0.74	[]		541956768_combined_results_1000.csv	541956768	50	50	43	50	22	21	1	1	0.86	1
ogundeyio-connection_validation-543692985_put_ADL02t(hLHT1)_R-complete	543692985	ADL02t_pct	Roughly traced	2719	6985	50	50	41	50	1	19	22	41	25	25	25	19	25	22	1	50	1	1	0.82	1	0.02	76	88	0.76	0.88	76	88	0.76	0.88	0.82	['Low Confidence Tbar and psd']	lohffa	543692985_combined_results_mb_retry.csv	543692985	50	50	45	50	22	23	1	1	0.9	1
ordishc-connection_validation-547552266_MBON33(y2y3)(mAOTU2)_R-complete	547552266	MBON33	Traced	710	6364	47	50	42	50	0	20	22	42	25	25	25	20	25	22	0	50	0.94	1	0.84	1	0	80	88	0.8	0.88	80	88	0.8	0.88	0.84	[]	takemurasa	547552266_combined_results_mb_retry.csv	547552266	47	50	43	50	22	21	0.94	1	0.86	1
ogundeyio-connection_validation-572988717_put_ADL13b(LBDL1)_R-complete	572988717	ADL13b_pct	Roughly traced	323	481	49	50	37	49	1	20	17	37	25	25	25	20	25	17	1	50	0.98	1	0.74	0.98	0.02	80	68	0.8	0.68	80	68	0.8	0.68	0.74	['Low Confidence psd']	lohffa	572988717_combined_results_mb.csv	572988717	49	50	40	47	22	18	0.98	1	0.8	0.94
smithc-connection_validation-578254032_put_ADM10q(ABDL)_R-complete	578254032	ADM10q_pct	Roughly traced	597	1712	47	50	38	50	3	20	18	38	25	25	25	20	25	18	3	50	0.94	1	0.76	1	0.06	80	72	0.8	0.72	80	72	0.8	0.72	0.76	['Not sure T-bar glyph is on a valid T-bar', 'Not sure T-bar glyph is on a valid T-bar', 'Not sure T-bar glyph is on a valid T-bar']	lohffa	578254032_combined_results_mb.csv	578254032	46	50	40	50	22	18	0.92	1	0.8	1
rymert-connection_validation-579912201_put_AVL01h(aVLPT3)_R-complete	579912201	AVL01h_pct	Traced	992	2977	48	50	44	50	0	22	22	44	24	26	24	22	26	22	1	50	0.96	1	0.88	1	0	91.66666667	84.61538462	0.916666667	0.846153846	91.66666667	84.61538462	0.916666667	0.846153846	0.88	['autapse']	ordishc	579912201_combined_results_mb.csv	579912201	48	50	46	50	22	24	0.96	1	0.92	1
ordishc-connection_validation-582101022_put_ADM07p(aSMPB)_R-complete	582101022	ADM07p_pct	Roughly traced	702	3002	50	50	45	50	0	22	23	45	25	25	25	22	25	23	0	50	1	1	0.9	1	0	88	92	0.88	0.92	88	92	0.88	0.92	0.9	[]	takemurasa	582101022_combined_results_mb_retry.csv	582101022	50	50	46	50	22	24	1	1	0.92	1
rymert-connection_validation-582700300_put_ADL03v(hLHT3)_R-complete	582700300	ADL03v_pct	Roughly traced	252	682	50	50	44	50	0	21	23	44	25	25	25	21	25	23	0	50	1	1	0.88	1	0	84	92	0.84	0.92	84	92	0.84	0.92	0.88	[]	ogundeyio	582700300_combined_results_mb.csv	582700300	49	50	45	49	22	23	0.98	1	0.9	0.98
605852310_put_PDM11u	605852310	PDM11u_pct	Roughly traced	344	674	49	50	41	50	2	20	21	41	25	25	23	20	25	21	2	50	0.98	1	0.82	1	0.04	80	84	0.8	0.84	80	84	0.869565217	0.84	0.82	['Unsure if PSD in cleft', 'Unsure where T-bar is']		605852310_combined_results_1000.csv	605852310	48	50	43	50	22	21	0.96	1	0.86	1
smithc-connection_validation-607933758_FB05s(igL1)_R-complete	607933758	FB5Q	Roughly traced	499	2278	47	49	41	50	4	23	18	41	25	25	25	23	25	18	4	50	0.94	0.98	0.82	1	0.08	92	72	0.92	0.72	92	72	0.92	0.72	0.82	['Not sure T-bar glyph is on a valid T-bar', 'Not sure T-bar glyph is on a valid T-bar', 'Not sure T-bar glyph is on a valid T-bar and the body with the "T-bar" may have a false merge', 'Not sure T-bar glyph is on a valid T-bar']	lohffa	607933758_combined_results_cx.csv	607933758	48	49	43	50	22	21	0.96	0.98	0.86	1
ogundeyio-connection_validation-611037750_put_ADM07v(aSMPB)_L-complete	611037750	ADM07oe_pct	Roughly traced	366	1645	50	50	43	50	1	22	21	43	25	25	25	22	25	21	1	50	1	1	0.86	1	0.02	88	84	0.88	0.84	88	84	0.88	0.84	0.86	['Low Confidence psd']	rymert	611037750_combined_results_mb.csv	611037750	50	50	46	50	22	24	1	1	0.92	1
lohffa-connection_validation-633541960_FB_Q7d_C6_R-complete	633541960	FC2D	Roughly traced	156	1429	49	49	44	50	3	20	24	43	25	25	25	20	25	24	3	50	0.98	0.98	0.88	1	0.06	80	96	0.8	0.96	80	96	0.8	0.96	0.86	['PSD not valid?', 'PSD not valid?', 'PSD not valid?']	lohffa	633541960_combined_results_cx.csv	633541960	49	49	47	50	22	25	0.98	0.98	0.94	1
ordishc-connection_validation-635062078_mPN1_DP1m(lineage)_R-complete	635062078	DP1m adPN	Roughly traced	5016	13182	44	50	40	50	0	21	19	39	25	25	25	21	25	19	0	50	0.88	1	0.8	1	0	84	76	0.84	0.76	84	76	0.84	0.76	0.78	[]	ordishc	635062078_combined_results_mb.csv	635062078	44	50	43	50	22	21	0.88	1	0.86	1
lohffa-connection_validation-663242420_FB_RUB_C9_R_small-complete	663242420	FR_b	Roughly traced	90	336	46	45	46	49	0	21	25	40	25	25	25	21	25	25	4	50	0.92	0.9	0.92	0.98	0	84	100	0.84	1	84	100	0.84	1	0.8	['Glif is placed on different body', 'T-bar is on a different body', 'T-bar is on different body', 'T-bar is actually on this "PSD" body']	lohffa	663242420_combined_results_cx.csv	663242420	47	45	45	49	22	23	0.94	0.9	0.9	0.98
ordishc-connection_validation-672006007_(igL2)_R-complete	672006007	AVM07c_pct	Roughly traced	182	527	50	50	43	50	0	20	23	43	24	26	24	20	26	23	0	50	1	1	0.86	1	0	83.33333333	88.46153846	0.833333333	0.884615385	83.33333333	88.46153846	0.833333333	0.884615385	0.86	[]	takemurasa	672006007_combined_results_mb.csv	672006007	49	50	46	49	22	24	0.98	1	0.92	0.98
lohffa-connection_validation-673068602_put_ADL29c(LBDL12)_R-complete	673068602	ADL29c_pct	Roughly traced	349	981	48	48	45	50	4	23	22	45	25	25	25	23	25	22	4	50	0.96	0.96	0.9	1	0.08	92	88	0.92	0.88	92	88	0.92	0.88	0.9	['PSD not valid?', 'T-bar glyph placed on 326879917 while it belongs to 673068602. The connection would be valid in this direction. ', 'PSD not valid?', 'T-bar and PSD not valid?']	lohffa	673068602_combined_results_mb_retry.csv	673068602	48	48	47	50	22	25	0.96	0.96	0.94	1
lohffa-connection_validation-696682163_EB_Q5_L-complete	696682163	EL	Roughly traced	1100	4835	50	49	44	49	4	21	23	42	25	25	25	21	25	23	6	50	1	0.98	0.88	0.98	0.08	84	92	0.84	0.92	84	92	0.84	0.92	0.84	['PSD not valid?', 'PSD not valid?', 'PSD not valid?', 'Unsure of T-bar body segmentation', 'PSD not valid', 'PSD not valid?']	rymert	696682163_combined_results_cx.csv	696682163	50	49	46	50	22	24	1	0.98	0.92	1
lohffa-connection_validation-702536798_FB_Q10b_C8_R-complete	702536798	FS2B	Roughly traced	113	1022	49	50	40	49	5	21	19	39	25	25	25	21	25	19	5	50	0.98	1	0.8	0.98	0.1	84	76	0.84	0.76	84	76	0.84	0.76	0.78	['PSD not valid?', 'PSD not valid?', 'I think T-bar glif is actually PSD', 'PSD not valid?', 'PSD not valid?']	lohffa	702536798_combined_results_cx.csv	702536798	48	49	42	49	22	20	0.96	0.98	0.84	0.98
728205616_put_PVL11z	728205616	PVL11z_pct	Roughly traced	314	455	49	50	41	50	2	20	21	41	25	25	23	20	22	19	2	50	0.98	1	0.82	1	0.04	80	84	0.8	0.84	80	84	0.869565217	0.863636364	0.82	['Low Confidence psd', 'Low Confidence psd']		728205616_combined_results_1000.csv	728205616	50	50	44	50	22	22	1	1	0.88	1
rymert-connection_validation-735488299_put_ADM05s(mAOTU2)_R-complete	735488299	C-LSm	Roughly traced	500	2253	50	50	46	50	0	24	22	46	25	25	25	24	25	22	0	50	1	1	0.92	1	0	96	88	0.96	0.88	96	88	0.96	0.88	0.92	[]	ogundeyio	735488299_combined_results_mb.csv	735488299	50	50	46	49	22	24	1	1	0.92	0.98
lohffa-connection_validation-736860990_OA_VUMa6_R-complete	736860990	OA-VUMa6	Roughly traced	3286	3072	50	50	46	50	7	22	24	46	25	25	25	22	25	24	12	50	1	1	0.92	1	0.14	88	96	0.88	0.96	88	96	0.88	0.96	0.92	['low confidence PSD placement', 'PSD not valid?', 'low confidence PSD placement', 'PSD not valid?', 'PSD not valid?', 'low confidence PSD placement', 'Multiple T-bars', 'PSD not valid?', 'PSD not valid?', 'PSD not valid?', 'PSD not valid?', 'low confidence PSD placement']	rymert	736860990_combined_results_mb_retry.csv	736860990	50	50	46	50	22	24	1	1	0.92	1
ogundeyio-connection_validation-737167616_PAM02(B'2a)(aSMP)_R-complete	737167616	PAM02	Roughly traced	231	1334	50	50	39	50	2	20	19	39	25	25	25	20	25	19	3	50	1	1	0.78	1	0.04	80	76	0.8	0.76	80	76	0.8	0.76	0.78	['Low Confidence psd', 'Low Confidence psd', 'Low Confidence psd']	ogundeyio	737167616_combined_results_mb.csv	737167616	50	50	42	50	22	20	1	1	0.84	1
rymert-connection_validation-737824168_put_ADM11g(sgL2)_R-complete	737824168	ADM11m_pct	Roughly traced	477	778	50	50	45	50	1	22	23	45	25	25	25	22	25	23	1	50	1	1	0.9	1	0.02	88	92	0.88	0.92	88	92	0.88	0.92	0.9	['PSD seems on edge of cleft']	lohffa	737824168_combined_results_mb_retry.csv	737824168	50	50	46	50	22	24	1	1	0.92	1
smithc-connection_validation-760094565_PB12b(PF_L)_L1-complete	760094565	PFL2	Roughly traced	428	2319	47	50	43	50	3	20	23	43	25	25	25	20	25	23	3	50	0.94	1	0.86	1	0.06	80	92	0.8	0.92	80	92	0.8	0.92	0.86	['Not sure T-bar glyph is on a valid T-bar', 'Not sure T-bar glyph is on a valid T-bar', 'Not sure T-bar glyph is on a valid T-bar']	smithc	760094565_combined_results_cx.csv	760094565	47	50	44	50	22	22	0.94	1	0.88	1
rymert-connection_validation-769605178_put_ADM10k(ABDL)_R-complete	769605178	ADM10k_pct	Roughly traced	114	925	50	50	43	50	0	20	23	43	25	25	25	20	25	23	0	50	1	1	0.86	1	0	80	92	0.8	0.92	80	92	0.8	0.92	0.86	[]	lohffa	769605178_combined_results_mb.csv	769605178	50	50	45	50	22	23	1	1	0.9	1
ogundeyio-connection_validation-770930321_put_ADM07s(aSMPB)_L-complete	770930321	ADM07s_pct	Roughly traced	149	534	50	50	37	50	0	21	16	37	25	25	25	21	25	16	0	50	1	1	0.74	1	0	84	64	0.84	0.64	84	64	0.84	0.64	0.74	[]	smithc	770930321_combined_results_mb.csv	770930321	50	50	39	50	22	17	1	1	0.78	1
takemurasa-connection_validation-789308735_FB02s(SFS1)_R-complete	789308735	FB2I_b	Roughly traced	531	1020	49	50	38	50	0	21	17	38	25	25	25	21	25	17	1	50	0.98	1	0.76	1	0	84	68	0.84	0.68	84	68	0.84	0.68	0.76	['Low confidence PSD']	lohffa	789308735_combined_results_cx.csv	789308735	49	50	41	49	22	19	0.98	1	0.82	0.98
ogundeyio-connection_validation-793128475_FB_Q7d_C5_R-complete	793128475	FC2D	Roughly traced	115	1080	50	50	41	50	1	20	21	41	25	25	25	20	25	21	1	50	1	1	0.82	1	0.02	80	84	0.8	0.84	80	84	0.8	0.84	0.82	['Low Confidence psd']	takemurasa	793128475_combined_results_cx.csv	793128475	50	50	45	50	22	23	1	1	0.9	1
ordishc-connection_validation-800212976_put_ADM10i(ABDL)_R-complete	800212976	ADM10w_pct	Roughly traced	211	592	46	49	37	50	0	20	17	35	25	25	25	20	25	17	0	50	0.92	0.98	0.74	1	0	80	68	0.8	0.68	80	68	0.8	0.68	0.7	[]	ordishc	800212976_combined_results_mb.csv	800212976	46	49	42	50	22	20	0.92	0.98	0.84	1
smithc-connection_validation-817342497_PB01b_R7-complete	817342497	PFNp_b	Roughly traced	68	282	50	50	41	50	0	22	19	41	25	25	25	22	25	19	0	50	1	1	0.82	1	0	88	76	0.88	0.76	88	76	0.88	0.76	0.82	[]	ordishc	817342497_combined_results_cx.csv	817342497	50	50	41	50	22	19	1	1	0.82	1
ordishc-connection_validation-830634936_(igL2)_R-complete	830634936	AVM07b_pct	Roughly traced	197	981	49	49	45	49	0	22	23	45	25	25	25	22	25	23	0	50	0.98	0.98	0.9	0.98	0	88	92	0.88	0.92	88	92	0.88	0.92	0.9	[]	rymert	830634936_combined_results_mb.csv	830634936	49	49	44	49	22	22	0.98	0.98	0.88	0.98
lohffa-connection_validation-854106922_put_ADL03b(hLHT3)_R-complete	854106922	ADL03b_pct	Roughly traced	396	1316	49	50	48	50	1	24	24	48	25	25	25	24	25	24	6	50	0.98	1	0.96	1	0.02	96	96	0.96	0.96	96	96	0.96	0.96	0.96	['PSD not valid?', 'low confidence PSD placement', 'Multiple T-bar', 'low confidence PSD placement', 'low confidence PSD placement', 'low confidence PSD placement']	lohffa	854106922_combined_results_mb_retry.csv	854106922	50	50	46	50	22	24	1	1	0.92	1
lohffa-connection_validation-858812398_(aAVLP2)_R-complete	858812398	AVL27c_pct	Roughly traced	1358	3804	46	50	43	50	2	21	22	43	25	25	25	21	25	22	8	50	0.92	1	0.86	1	0.04	84	88	0.84	0.88	84	88	0.84	0.88	0.86	['low confidence PSD placement', 'low confidence PSD placement', 'PSD not valid?', 'PSD not valid?', 'Multiple T-bars', 'low confidence PSD placement', 'PSD not valid?', 'low confidence PSD placement']	ogundeyio	858812398_combined_results_mb_retry.csv	858812398	47	50	45	50	22	23	0.94	1	0.9	1
lohffa-connection_validation-861583205_put_ADM11i(sgL2)_R-complete	861583205	ADM11k_pct	Roughly traced	325	809	50	50	49	50	3	24	25	49	25	25	25	24	25	25	6	50	1	1	0.98	1	0.06	96	100	0.96	1	96	100	0.96	1	0.98	['PSD not valid?', 'low confidence PSD placement', 'low confidence PSD placement', 'PSD not valid?', 'PSD not valid?', 'T-bar and PSD not valid?']	lohffa	861583205_combined_results_mb.csv	861583205	50	50	44	50	22	22	1	1	0.88	1
rymert-connection_validation-885257860_FB08d(lATL)_R-complete	885257860	FB8C	Roughly traced	282	1233	49	49	45	49	1	22	23	43	25	25	25	22	25	23	1	50	0.98	0.98	0.9	0.98	0.02	88	92	0.88	0.92	88	92	0.88	0.92	0.86	['PSD on edge of cleft']	ordishc	885257860_combined_results_cx.csv	885257860	50	50	46	50	22	24	1	1	0.92	1
lohffa-connection_validation-885257867_Delta6f_01-complete	885257867	Delta6F_a	Roughly traced	362	3181	50	45	41	49	4	17	24	37	25	25	25	17	25	24	4	50	1	0.9	0.82	0.98	0.08	68	96	0.68	0.96	68	96	0.68	0.96	0.74	['PSD not valid?', 'PSD not valid?', 'PSD not valid?', 'PSD not valid?']	lohffa	885257867_combined_results_cx.csv	885257867	50	48	45	49	22	23	1	0.96	0.9	0.98
ogundeyio-connection_validation-915610388_FB_Q12b_C5_R-complete	915610388	FS4B	Roughly traced	84	251	50	50	41	50	7	20	21	41	25	25	25	20	25	21	7	50	1	1	0.82	1	0.14	80	84	0.8	0.84	80	84	0.8	0.84	0.82	['Low Confidence psd', 'Low Confidence psd', 'Low Confidence psd', 'Low Confidence psd', 'Low Confidence psd', 'Low Confidence psd', 'Low Confidence psd']	rymert	915610388_combined_results_cx.csv	915610388	50	50	43	50	22	21	1	1	0.86	1
ordishc-connection_validation-915947054_FBQ10c_C5_L-complete	915947054	FS2B	Roughly traced	71	507	50	50	46	50	0	21	25	46	25	25	25	21	25	25	0	50	1	1	0.92	1	0	84	100	0.84	1	84	100	0.84	1	0.92	[]	takemurasa	915947054_combined_results_cx.csv	915947054	50	50	47	50	22	25	1	1	0.94	1
takemurasa-connection_validation-916305060_Delta6h_01-complete	916305060	Delta6G	Roughly traced	431	3208	47	49	39	49	0	20	19	38	25	25	25	20	25	19	0	50	0.94	0.98	0.78	0.98	0	80	76	0.8	0.76	80	76	0.8	0.76	0.76	[]	ordishc	916305060_combined_results_cx.csv	916305060	49	50	44	49	22	22	0.98	1	0.88	0.98
lohffa-connection_validation-916646694_FB_Q10c_C6_L-complete	916646694	FS2B	Roughly traced	105	982	50	49	47	49	2	22	25	45	25	25	25	22	25	25	3	50	1	0.98	0.94	0.98	0.04	88	100	0.88	1	88	100	0.88	1	0.9	['PSD not valid?', 'PSD not valid?', 'Low confidence PSD placement']	rymert	916646694_combined_results_cx.csv	916646694	49	49	47	50	22	25	0.98	0.98	0.94	1
takemurasa-connection_validation-947681560_FB_Q10a_C6_L-complete	947681560	FS2A	Roughly traced	78	619	50	50	42	50	0	20	22	42	25	25	25	20	25	22	0	50	1	1	0.84	1	0	80	88	0.8	0.88	80	88	0.8	0.88	0.84	[]	takemurasa	947681560_combined_results_cx.csv	947681560	50	50	46	50	22	24	1	1	0.92	1
rymert-connection_validation-948709216_ExR1(ring)_R_001-complete	948709216	ExR1	Traced	1519	10008	50	50	45	49	2	21	24	44	25	25	25	21	25	24	3	50	1	1	0.9	0.98	0.04	84	96	0.84	0.96	84	96	0.84	0.96	0.88	['unsure where cleft ends', 'PSD placed on an invagination', 'PSD cell borders the cleft but not in it']	rymert	948709216_combined_results_cx.csv	948709216	50	50	47	50	22	25	1	1	0.94	1
ogundeyio-connection_validation-951018323_put_AVL04n(lVLPT1)_R-complete	951018323	Pl-CSm	Roughly traced	98	491	50	50	43	50	2	21	22	43	25	25	25	21	25	22	2	50	1	1	0.86	1	0.04	84	88	0.84	0.88	84	88	0.84	0.88	0.86	['Low Confidence psd', 'Low Confidence psd']	takemurasa	951018323_combined_results_mb.csv	951018323	50	50	44	50	22	22	1	1	0.88	1
ordishc-connection_validation-977335129_FBQ7b_C5_R-complete	977335129	FC2B	Roughly traced	186	2114	49	50	48	49	0	24	24	47	25	25	25	24	25	24	0	50	0.98	1	0.96	0.98	0	96	96	0.96	0.96	96	96	0.96	0.96	0.94	[]	ogundeyio	977335129_combined_results_cx.csv	977335129	50	50	47	49	22	25	1	1	0.94	0.98
takemurasa-connection_validation-978366493_FB06t(aVT1)_R-complete	978366493	FB6O	Roughly traced	486	1898	47	50	36	50	0	19	17	36	25	25	25	19	25	17	3	50	0.94	1	0.72	1	0	76	68	0.76	0.68	76	68	0.76	0.68	0.72	['Low confidence PSD', 'Low confidence PSD', 'Low confidence PSD']	rymert	978366493_combined_results_cx.csv	978366493	47	50	41	50	22	19	0.94	1	0.82	1
smithc-connection_validation-978370600_FB_Q10b_C6_R-complete	978370600	FS2B	Roughly traced	100	946	48	50	43	50	2	23	20	43	25	25	25	23	25	20	2	50	0.96	1	0.86	1	0.04	92	80	0.92	0.8	92	80	0.92	0.8	0.86	['Not sure the T-bar glyph is on a valid T-bar', 'Not sure T-bar glyph is on a valid T-bar']	ordishc	978370600_combined_results_cx.csv	978370600	48	50	45	50	22	23	0.96	1	0.9	1
ogundeyio-connection_validation-979048306_Delta0b-complete	979048306	Delta0C	Roughly traced	120	495	49	50	42	50	4	21	21	42	25	25	25	21	25	21	4	50	0.98	1	0.84	1	0.08	84	84	0.84	0.84	84	84	0.84	0.84	0.84	['Low Confidence psd', 'Low Confidence psd', 'Unsure of Tbar', 'Low Confidence psd']	rymert	979048306_combined_results_cx_retry.csv	979048306	48	50	46	50	22	24	0.96	1	0.92	1
smithc-connection_validation-1008693462_FB_Q7d_C4_R-complete	1008693462	FC2D	Roughly traced	146	1273	49	50	44	50	1	21	23	44	25	25	25	21	25	23	1	50	0.98	1	0.88	1	0.02	84	92	0.84	0.92	84	92	0.84	0.92	0.88	['Not sure T-bar glyph is on a valid T-bar']	rymert	1008693462_combined_results_cx.csv	1008693462	50	50	47	50	22	25	1	1	0.94	1
smithc-connection_validation-1009768220_FB_Q10b_C7_R-complete	1009768220	FS2B	Roughly traced	98	1060	49	50	42	50	1	21	21	42	25	25	25	21	25	21	1	50	0.98	1	0.84	1	0.02	84	84	0.84	0.84	84	84	0.84	0.84	0.84	['Not sure the T-bar glyph is on a valid T-bar']	smithc	1009768220_combined_results_cx.csv	1009768220	48	50	45	50	22	23	0.96	1	0.9	1
1019556103_put_PVL04oc	1019556103	PVL04oc_pct	Roughly traced	160	336	49	50	34	50	1	20	14	34	25	25	24	19	20	13	1	50	0.98	1	0.68	1	0.02	80	56	0.8	0.56	80	56	0.791666667	0.65	0.68	['Low Confidence psd']		1019556103_combined_results_1000.csv	1019556103	49	50	40	50	22	18	0.98	1	0.8	1
1043731200_put_AVL13m	1043731200	AVL13m_pct	Roughly traced	226	304	50	50	48	50	0	25	23	48	25	25	21	21	22	21	0	50	1	1	0.96	1	0	100	92	1	0.92	100	92	1	0.954545455	0.96	[]		1043731200_combined_results_1000.csv	1043731200	49	50	46	50	22	24	0.98	1	0.92	1
ogundeyio-connection_validation-1050922195_put_ADM10h(ABDL)_R-complete	1050922195	ADM10h_pct	Roughly traced	226	810	50	50	42	50	1	22	20	42	25	25	25	22	25	20	1	50	1	1	0.84	1	0.02	88	80	0.88	0.8	88	80	0.88	0.8	0.84	['Low Confidence psd']	ogundeyio	1050922195_combined_results_mb.csv	1050922195	50	50	43	50	22	21	1	1	0.86	1
smithc-connection_validation-1070810640_FB05u(lATL)_R-complete	1070810640	FB5S	Roughly traced	255	1644	47	50	43	50	3	20	23	43	25	25	25	20	25	23	3	50	0.94	1	0.86	1	0.06	80	92	0.8	0.92	80	92	0.8	0.92	0.86	['Not sure T-bar glyph is on a valid T-bar', 'Not sure T-bar glyph is on a valid T-bar', 'Not sure T-bar glyph is on a valid T-bar']	ordishc	1070810640_combined_results_cx.csv	1070810640	48	50	45	50	22	23	0.96	1	0.9	1
takemurasa-connection_validation-1071505774_FB_Q8_C7_R-complete	1071505774	FC3	Roughly traced	145	675	48	50	40	50	0	23	17	40	25	25	25	23	25	17	2	50	0.96	1	0.8	1	0	92	68	0.92	0.68	92	68	0.92	0.68	0.8	['Low confidence PSD', 'Low confidence PSD']	rymert	1071505774_combined_results_cx.csv	1071505774	49	50	41	50	22	19	0.98	1	0.82	1
ogundeyio-connection_validation-1074859771_FB05t(lATL)_R-complete	1074859771	FB5R	Roughly traced	262	1932	49	50	42	49	4	21	21	41	25	25	25	21	25	21	5	50	0.98	1	0.84	0.98	0.08	84	84	0.84	0.84	84	84	0.84	0.84	0.82	['Low Confidence psd', "False merge of two psd's into one body", 'Low Confidence psd', 'Low Confidence psd', 'Low Confidence psd']	rymert	1074859771_combined_results_cx.csv	1074859771	48	50	41	49	22	19	0.96	1	0.82	0.98
lohffa-connection_validation-1095275456_PB13(T1_PB_DAN)-complete	1095275456	LPsP	Traced	1864	4173	49	49	47	49	6	23	24	45	25	25	25	23	25	24	10	50	0.98	0.98	0.94	0.98	0.12	92	96	0.92	0.96	92	96	0.92	0.96	0.9	['low confidence PSD placement', 'PSD not valid?', 'low confidence PSD placement', 'PSD not valid?', 'PSD affected by different T-bar', ' ', "Can't determine if PSD is valid", 'T-bar and PSD not valid?', 'PSD not valid?', 'T-bar and PSD not valid?']	rymert	1095275456_combined_results_cx.csv	1095275456	49	49	46	49	22	24	0.98	0.98	0.92	0.98
lohffa-connection_validation-1101845661_FB_Q7a_C7_R-complete	1101845661	FC2A	Roughly traced	246	2272	50	49	46	49	6	23	23	44	25	25	25	23	25	23	6	50	1	0.98	0.92	0.98	0.12	92	92	0.92	0.92	92	92	0.92	0.92	0.88	['PSD not valid?', 'PSD not valid?', 'PSD not valid?', 'PSD not valid?', 'PSD not valid?', 'PSD not valid?']	ogundeyio	1101845661_combined_results_cx.csv	1101845661	50	50	46	49	22	24	1	1	0.92	0.98
takemurasa-connection_validation-1104155523_Delta12b_R-complete	1104155523	Delta0D	Roughly traced	100	673	49	49	44	50	0	22	22	44	25	25	25	22	25	22	1	50	0.98	0.98	0.88	1	0	88	88	0.88	0.88	88	88	0.88	0.88	0.88	['Floating PSD']	takemurasa	1104155523_combined_results_cx.csv	1104155523	49	49	46	50	22	24	0.98	0.98	0.92	1
rymert-connection_validation-1131831990_FB04e(aVT1)_R-complete	1131831990	FB4E	Roughly traced	205	1067	49	48	43	48	2	19	24	43	25	25	25	19	25	24	3	50	0.98	0.96	0.86	0.96	0.04	76	96	0.76	0.96	76	96	0.76	0.96	0.86	['Synapse on hotknife', 'hotknife', 'Not sure if cleft exists']	lohffa	1131831990_combined_results_cx.csv	1131831990	49	49	47	49	22	25	0.98	0.98	0.94	0.98
ordishc-connection_validation-1133484841_FBQ8_C2_R-complete	1133484841	FC3	Roughly traced	161	962	48	50	42	50	0	21	21	42	25	25	25	21	25	21	0	50	0.96	1	0.84	1	0	84	84	0.84	0.84	84	84	0.84	0.84	0.84	[]	ogundeyio	1133484841_combined_results_cx.csv	1133484841	47	50	43	50	22	21	0.94	1	0.86	1
takemurasa-connection_validation-1134581674_Delta0d-complete	1134581674	Delta0F	Roughly traced	163	946	48	49	39	50	1	21	18	39	25	25	25	21	25	18	2	50	0.96	0.98	0.78	1	0.02	84	72	0.84	0.72	84	72	0.84	0.72	0.78	['Tbar should be on 860305498.', 'Cannot select because of overlapping Tbar']	lohffa	1134581674_combined_results_cx.csv	1134581674	48	49	42	50	22	20	0.96	0.98	0.84	1
ordishc-connection_validation-1134849005_FBQ7d_C1_R-complete	1134849005	FC2D	Roughly traced	123	1233	50	50	46	50	0	22	24	46	25	25	25	22	25	24	0	50	1	1	0.92	1	0	88	96	0.88	0.96	88	96	0.88	0.96	0.92	[]	smithc	1134849005_combined_results_cx.csv	1134849005	50	50	47	50	22	25	1	1	0.94	1
ordishc-connection_validation-1136545839_FBQ12a_C1_R-complete	1136545839	FS4A	Roughly traced	74	425	49	50	45	50	0	21	24	45	25	25	25	21	25	24	0	50	0.98	1	0.9	1	0	84	96	0.84	0.96	84	96	0.84	0.96	0.9	[]	ogundeyio	1136545839_combined_results_cx.csv	1136545839	49	50	46	50	22	24	0.98	1	0.92	1
rymert-connection_validation-1138579549_LL12(mAOTU3)_R-complete	1138579549	VeLC-LVe(c)	Roughly traced	943	9274	50	50	45	49	0	21	24	44	25	25	25	21	25	24	0	50	1	1	0.9	0.98	0	84	96	0.84	0.96	84	96	0.84	0.96	0.88	[]	lohffa	1138579549_combined_results_mb_retry.csv	1138579549	49	50	44	49	22	22	0.98	1	0.88	0.98
takemurasa-connection_validation-1165236314_FB_Q6c_C4_R-complete	1165236314	FC1_d	Roughly traced	191	709	48	49	41	49	0	22	19	41	25	25	25	22	25	19	2	50	0.96	0.98	0.82	0.98	0	88	76	0.88	0.76	88	76	0.88	0.76	0.82	['Split needed at (24473, 21324, 20620)', 'Low confidence']	rymert	1165236314_combined_results_cx.csv	1165236314	50	50	43	49	22	21	1	1	0.86	0.98
ordishc-connection_validation-1167593263_FBQ10c_C1_R-complete	1167593263	FS2B	Roughly traced	109	1285	50	50	43	50	1	21	22	43	25	25	25	21	25	22	1	50	1	1	0.86	1	0.02	84	88	0.84	0.88	84	88	0.84	0.88	0.86	['low confidence']	rymert	1167593263_combined_results_cx.csv	1167593263	49	50	45	50	22	23	0.98	1	0.9	1
smithc-connection_validation-1168664512_FB_Q6b_C9_L-complete	1168664512	FC1_b	Roughly traced	110	477	50	50	47	50	0	22	25	47	25	25	25	22	25	25	0	50	1	1	0.94	1	0	88	100	0.88	1	88	100	0.88	1	0.94	[]	smithc	1168664512_combined_results_cx.csv	1168664512	50	50	46	50	22	24	1	1	0.92	1
takemurasa-connection_validation-1169005415_FB_RUB_C1_R_small-complete	1169005415	FR_b	Roughly traced	94	676	50	50	41	50	0	20	21	41	25	25	25	20	25	21	3	50	1	1	0.82	1	0	80	84	0.8	0.84	80	84	0.8	0.84	0.82	['Low confidence PSD', 'Low confidence PSD', 'Low confidence PSD']	lohffa	1169005415_combined_results_cx.csv	1169005415	50	50	44	50	22	22	1	1	0.88	1
rymert-connection_validation-1169989698_PAM06(B'2m)(aSMP)_R-complete	1169989698	PAM06	Roughly traced	402	1636	49	50	45	50	0	21	24	45	25	25	25	21	25	24	1	50	0.98	1	0.9	1	0	84	96	0.84	0.96	84	96	0.84	0.96	0.9	['T-bar glyph on wrong body']	rymert	1169989698_combined_results_mb_retry.csv	1169989698	49	50	46	50	22	24	0.98	1	0.92	1
ogundeyio-connection_validation-1170352367_put_ADM02a(aSMP)_R-complete	1170352367	ADM02a_pct	Roughly traced	392	1911	47	49	34	50	3	20	14	34	25	25	25	20	25	14	3	50	0.94	0.98	0.68	1	0.06	80	56	0.8	0.56	80	56	0.8	0.56	0.68	['Low Confidence psd', 'Low Confidence psd', 'Glia merged to Roughly traced Pre-synaptic body']	rymert	1170352367_combined_results_mb_retry.csv	1170352367	50	50	39	49	22	17	1	1	0.78	0.98
lohffa-connection_validation-1170667130_KCa'B'-complete	1170667130	KCa'b'	Roughly traced	315	706	49	50	40	49	4	21	19	40	25	25	25	21	25	19	4	50	0.98	1	0.8	0.98	0.08	84	76	0.84	0.76	84	76	0.84	0.76	0.8	['PSD not valid?', 'T-bar glif placed inconspicuously between 3 bodies.', 'PSD not valid?', 'PSD not valid?']	rymert	1170667130_combined_results_mb_retry.csv	1170667130	47	50	39	50	22	17	0.94	1	0.78	1
rymert-connection_validation-1173029301_(PPF)_R-complete	1173029301	PVM12b_pct	Roughly traced	780	1419	50	50	41	50	0	22	19	41	25	25	25	22	25	19	0	50	1	1	0.82	1	0	88	76	0.88	0.76	88	76	0.88	0.76	0.82	[]	lohffa	1173029301_combined_results_mb_retry.csv	1173029301	50	50	43	50	22	21	1	1	0.86	1
rymert-connection_validation-1173814525_MBON34(y2)(aSMPB)_L-complete	1173814525	MBON34	Roughly traced	204	933	48	50	47	50	0	23	24	47	25	25	25	23	25	24	0	50	0.96	1	0.94	1	0	92	96	0.92	0.96	92	96	0.92	0.96	0.94	[]	ogundeyio	1173814525_combined_results_mb_retry.csv	1173814525	47	50	45	50	22	23	0.94	1	0.9	1
rymert-connection_validation-1224595644_FB02q(SFS1)_R-complete	1224595644	FB2I_a	Roughly traced	702	1766	50	48	41	50	6	21	20	40	25	25	25	21	25	20	6	50	1	0.96	0.82	1	0.12	84	80	0.84	0.8	84	80	0.84	0.8	0.8	['PSD on edge of cleft', 'PSD on edge of cleft', 'PSD on edge of cleft', 'PSD on edge of cleft', 'T-bar glyph placed between two t bars', 'PSD seems out of cleft']	takemurasa	1224595644_combined_results_cx.csv	1224595644	50	48	43	50	22	21	1	0.96	0.86	1
1226206190_put_PVM01q	1226206190	PVM01q_pct	Roughly traced	341	1129	50	50	45	50	1	20	25	45	25	25	22	19	23	23	1	50	1	1	0.9	1	0.02	80	100	0.8	1	80	100	0.863636364	1	0.9	['Unsure if PSD makes it in cleft']		1226206190_combined_results_1000.csv	1226206190	50	50	47	50	22	25	1	1	0.94	1
ordishc-connection_validation-1230095228_FBQ9_C9_L-complete	1230095228	FS1C	Roughly traced	101	611	50	50	47	50	0	24	23	47	25	25	25	24	25	23	0	50	1	1	0.94	1	0	96	92	0.96	0.92	96	92	0.96	0.92	0.94	[]	ordishc	1230095228_combined_results_cx.csv	1230095228	50	50	44	49	22	22	1	1	0.88	0.98
ordishc-connection_validation-1231066662_R5(ring)(igL2)_R-complete	1231066662	R5	Traced	610	961	42	50	37	50	0	20	17	37	24	26	24	20	26	17	0	50	0.84	1	0.74	1	0	83.33333333	65.38461538	0.833333333	0.653846154	83.33333333	65.38461538	0.833333333	0.653846154	0.74	[]	lohffa	1231066662_combined_results_cx.csv	1231066662	45	50	42	50	22	20	0.9	1	0.84	1
lohffa-connection_validation-1260011966_FB_Q7b_C1_R-complete	1260011966	FC2B	Roughly traced	177	2184	50	48	44	50	1	21	23	42	25	25	25	21	25	23	2	50	1	0.96	0.88	1	0.02	84	92	0.84	0.92	84	92	0.84	0.92	0.84	['PSD not valid?', 'I think the PSD is affected by a different T-bar on the same body.']	lohffa	1260011966_combined_results_cx.csv	1260011966	49	49	46	50	22	24	0.98	0.98	0.92	1
ordishc-connection_validation-1261130112_FBQ6a_C9_L-complete	1261130112	FC1_a	Roughly traced	170	789	49	50	46	48	0	23	23	45	25	25	25	23	25	23	0	50	0.98	1	0.92	0.96	0	92	92	0.92	0.92	92	92	0.92	0.92	0.9	[]	ogundeyio	1261130112_combined_results_cx.csv	1261130112	49	50	44	48	22	22	0.98	1	0.88	0.96
takemurasa-connection_validation-1261436305_R3dB(ring)(igL2)_R-complete	1261436305	R3d_b	Traced	371	1314	43	49	37	49	2	20	17	37	25	25	25	20	25	17	2	50	0.86	0.98	0.74	0.98	0.04	80	68	0.8	0.68	80	68	0.8	0.68	0.74	['Low confidence PSD', 'Low confidence Tbar']	lohffa	1261436305_combined_results_cx.csv	1261436305	44	49	41	49	22	19	0.88	0.98	0.82	0.98
takemurasa-connection_validation-1287360108_FB02v(aVT1)_R-complete	1287360108	FB2K	Roughly traced	173	1162	50	50	47	50	0	22	25	47	25	25	25	22	25	25	1	50	1	1	0.94	1	0	88	100	0.88	1	88	100	0.88	1	0.94	['Low confidence PSD']	smithc	1287360108_combined_results_cx.csv	1287360108	50	50	46	50	22	24	1	1	0.92	1
ogundeyio-connection_validation-1292803650_R3m(ring)(igL2)_R-complete	1292803650	R3m	Traced	336	1017	50	50	42	50	4	21	21	42	25	25	25	21	25	21	7	50	1	1	0.84	1	0.08	84	84	0.84	0.84	84	84	0.84	0.84	0.84	['Low Confidence psd', 'Low Confidence psd', 'Low Confidence psd', 'Low Confidence psd', 'Autapse', 'Low Confidence psd', 'Low Confidence psd']	ordishc	1292803650_combined_results_cx.csv	1292803650	50	49	45	49	22	23	1	0.98	0.9	0.98
lohffa-connection_validation-1320825799_FB_Q6b_C8_R-complete	1320825799	FC1_c	Roughly traced	133	705	49	46	43	49	0	20	23	39	25	25	25	20	25	23	1	50	0.98	0.92	0.86	0.98	0	80	92	0.8	0.92	80	92	0.8	0.92	0.78	['low confidence PSD placement ']	ogundeyio	1320825799_combined_results_cx.csv	1320825799	48	47	44	49	22	22	0.96	0.94	0.88	0.98
rymert-connection_validation-1351869732_FB_Q7a_C9_R.json-complete	1351869732	FC2A	Roughly traced	246	2097	48	48	43	50	1	21	22	41	25	25	25	21	25	22	3	50	0.96	0.96	0.86	1	0.02	84	88	0.84	0.88	84	88	0.84	0.88	0.82	['unsure if too far away', 'segmentation overlaps different Tbar', 'hotknife']	smithc	1351869732_combined_results_cx.csv	1351869732	48	49	47	50	22	25	0.96	0.98	0.94	1
lohffa-connection_validation-1355115431_put_ADL08m(sgL1)_R-complete	1355115431	ADL08m_pct	Roughly traced	698	1997	48	50	43	50	1	21	22	43	25	25	25	21	25	22	3	50	0.96	1	0.86	1	0.02	84	88	0.84	0.88	84	88	0.84	0.88	0.86	['low confidence PSD placement', 'PSD not valid?', 'low confidence PSD placement']	ordishc	1355115431_combined_results_mb_retry.csv	1355115431	48	50	46	50	22	24	0.96	1	0.92	1
ogundeyio-connection_validation-1375266871_FB_Q6c_C2_R-complete	1375266871	FC1_d	Roughly traced	165	636	49	50	43	50	2	21	22	43	25	25	25	21	25	22	2	50	0.98	1	0.86	1	0.04	84	88	0.84	0.88	84	88	0.84	0.88	0.86	['Low Confidence psd', 'Low Confidence psd']	ordishc	1375266871_combined_results_cx.csv	1375266871	50	50	45	50	22	23	1	1	0.9	1
lohffa-connection_validation-2095549849_(A16)_R-complete	2095549849	AVM06d_pct	Traced	1524	3628	49	50	44	50	6	22	22	44	25	25	25	22	25	22	8	50	0.98	1	0.88	1	0.12	88	88	0.88	0.88	88	88	0.88	0.88	0.88	['low confidence PSD placement', 'PSD not valid?', 'PSD not valid?', 'PSD not valid?', 'T-bar and PSD not valid?', 'PSD affected by different T-bar', 'T-bar and PSD not valid?', 'PSD not valid?']	lohffa	2095549849_combined_results_mb_retry.csv	2095549849	49	50	45	50	22	23	0.98	1	0.9	1
takemurasa-connection_validation-5812980647_(PLPF13)_R-complete	5812980647	PVL08h_pct	Roughly traced	177	693	47	50	42	50	1	21	21	42	25	25	25	21	25	21	1	50	0.94	1	0.84	1	0.02	84	84	0.84	0.84	84	84	0.84	0.84	0.84	['Low confident PSD']	lohffa	5812980647_combined_results_mb_retry.csv	5812980647	49	50	44	50	22	22	0.98	1	0.88	1
rymert-connection_validation-5812980666_FB05k(aVT1)_R-complete	5812980666	FB5K	Roughly traced	627	4137	48	48	43	49	0	20	23	43	25	25	25	20	25	23	2	50	0.96	0.96	0.86	0.98	0	80	92	0.8	0.92	80	92	0.8	0.92	0.86	['hotknife', 'hotknife']	lohffa	5812980666_combined_results_cx.csv	5812980666	49	49	43	50	22	21	0.98	0.98	0.86	1
lohffa-connection_validation-5812981381_PPL102(y1)(SFS1)_L-complete	5812981381	PPL102	Roughly traced	2763	8298	50	50	48	50	1	23	25	48	25	25	25	23	25	25	4	50	1	1	0.96	1	0.02	92	100	0.92	1	92	100	0.92	1	0.96	['low confidence PSD placement', 'low confidence PSD placement', 'low confidence PSD placement', 'PSD not valid?']	rymert	5812981381_combined_results_mb.csv	5812981381	47	50	45	50	22	23	0.94	1	0.9	1
ordishc-connection_validation-5812983883_FB04f(aVT1)_R-complete	5812983883	FB4F_a	Roughly traced	422	1949	49	50	45	50	0	23	22	45	25	25	25	23	25	22	0	50	0.98	1	0.9	1	0	92	88	0.92	0.88	92	88	0.92	0.88	0.9	[]	takemurasa	5812983883_combined_results_cx.csv	5812983883	50	50	46	50	22	24	1	1	0.92	1
ordishc-connection_validation-5813020684_FB06j(SFS1)_R-complete	5813020684	FB6H	Roughly traced	1486	4296	48	50	42	50	0	19	23	42	25	25	25	19	25	23	0	50	0.96	1	0.84	1	0	76	92	0.76	0.92	76	92	0.76	0.92	0.84	[]	takemurasa	5813020684_combined_results_cx.csv	5813020684	48	50	47	50	22	25	0.96	1	0.94	1
ordishc-connection_validation-5813021874_(PSF1)_R-complete	5813021874	PVM04b_pct	Roughly traced	863	1062	49	50	42	49	0	22	20	41	25	25	25	22	25	20	0	50	0.98	1	0.84	0.98	0	88	80	0.88	0.8	88	80	0.88	0.8	0.82	[]	rymert	5813021874_combined_results_mb_retry.csv	5813021874	49	50	44	49	22	22	0.98	1	0.88	0.98
ogundeyio-connection_validation-5813022896_MBON21(y4y5)(PLPF3)_R-complete	5813022896	MBON21	Traced	1168	12501	48	50	44	50	3	21	23	44	25	25	25	21	25	23	3	50	0.96	1	0.88	1	0.06	84	92	0.84	0.92	84	92	0.84	0.92	0.88	['Low Confidence psd', 'Low Confidence psd', 'Low Confidence psd']	ordishc	5813022896_combined_results_mb.csv	5813022896	48	50	46	50	22	24	0.96	1	0.92	1
smithc-connection_validation-5813055913_FB01c(NO1_NO3)(MEF1)_R-complete	5813055913	FB1C	Roughly traced	1290	2962	46	50	41	50	4	20	21	41	25	25	25	20	25	21	4	50	0.92	1	0.82	1	0.08	80	84	0.8	0.84	80	84	0.8	0.84	0.82	['Not sure T-bar glyph is on a valid T-bar', 'Not sure T-bar glyph is on a valid T-bar', 'Not sure T-bar glyph is on a valid T-bar', 'Not sure T-bar glyph is on a valid T-bar']	ordishc	5813055913_combined_results_cx_remakes.csv	5813055913	47	50	45	50	22	23	0.94	1	0.9	1
ogundeyio-connection_validation-5813060781_put_ADL01z(LBDL2)_R-complete	5813060781	ADL01z_pct	Roughly traced	1999	3133	48	50	41	50	1	22	19	41	25	25	25	22	25	19	1	50	0.96	1	0.82	1	0.02	88	76	0.88	0.76	88	76	0.88	0.76	0.82	['Low Confidence psd']	lohffa	5813060781_combined_results_mb.csv	5813060781	49	50	43	50	22	21	0.98	1	0.86	1
rymert-connection_validation-5813078708_IB_ATL(pLH4)_R-complete	5813078708	PDL28e_pct	Roughly traced	917	985	47	49	42	48	0	22	20	42	25	25	25	22	25	20	1	50	0.94	0.98	0.84	0.96	0	88	80	0.88	0.8	88	80	0.88	0.8	0.84	['PSD needs split']	takemurasa	5813078708_combined_results_mb.csv	5813078708	47	49	44	49	22	22	0.94	0.98	0.88	0.98
rymert-connection_validation-5901192948_put_ADL03a(hLHT3)_R-complete	5901192948	ADL03a_pct	Roughly traced	265	1371	50	50	45	48	1	21	24	43	25	25	25	21	25	24	2	50	1	1	0.9	0.96	0.02	84	96	0.84	0.96	84	96	0.84	0.96	0.86	['PSD needs split', 'PSD needs split']	rymert	5901192948_combined_results_mb.csv	5901192948	50	50	45	49	22	23	1	1	0.9	0.98
ogundeyio-connection_validation-5901213440_put_ADM05h(mAOTU2)_R-complete	5901213440	ADM05h_pct	Roughly traced	2145	19312	48	50	40	50	1	19	21	40	25	25	25	19	25	21	1	50	0.96	1	0.8	1	0.02	76	84	0.76	0.84	76	84	0.76	0.84	0.8	['Low Confidence psd']	lohffa	5901213440_combined_results_mb_retry.csv	5901213440	49	50	45	50	22	23	0.98	1	0.9	1
ordishc-connection_validation-203253072_FBQ12a_C3_R-complete	203253072	FS4A	Roughly traced	62	367	50	50	43	50	0	23	20	43	25	25	25	23	25	20	0	50	1	1	0.86	1	0	92	80	0.92	0.8	92	80	0.92	0.8	0.86	[]	ordishc	203253072_combined_results_cx.csv	203253072	50	50	45	50	23	22	1	1	0.9	1
smithc-connection_validation-203594175_FB_Q12a_C4_R-complete	203594175	FS4A	Roughly traced	57	338	49	49	41	49	1	23	18	40	24	26	24	23	26	18	3	50	0.98	0.98	0.82	0.98	0.02	95.83333333	69.23076923	0.958333333	0.692307692	95.83333333	69.23076923	0.958333333	0.692307692	0.8	['PSD glyph is on the same T-bar marked by the T-bar glyph', 'Hot knife stitch is messing with the segmentation of both bodies', 'Not sure T-bar glyph is on a valid T-bar']	takemurasa	203594175_combined_results_cx.csv	203594175	50	49	44	48	23	21	1	0.98	0.88	0.96
lohffa-connection_validation-265120597_FB01d(SFS1)_R-complete	265120597	FB1D	Roughly traced	370	1132	49	49	46	48	1	22	24	43	25	25	25	22	25	24	2	50	0.98	0.98	0.92	0.96	0.02	88	96	0.88	0.96	88	96	0.88	0.96	0.86	['PSD not valid?', 'low confidence PSD placement']	ordishc	265120597_combined_results_cx.csv	265120597	49	50	47	49	23	24	0.98	1	0.94	0.98
294161385_put_PDM30h	294161385	PDM30h_pct	Traced	187	697	48	49	38	50	2	21	17	37	25	25	22	20	23	17	3	50	0.96	0.98	0.76	1	0.04	84	68	0.84	0.68	84	68	0.909090909	0.739130435	0.74	['low confidence', 'Unsure if T-bar', 'Unsure if PSD in cleft']		294161385_combined_results_1000.csv	294161385	50	49	43	50	23	20	1	0.98	0.86	1
takemurasa-connection_validation-295477903_FB08h(pSM6)_R-complete	295477903	FB7M	Roughly traced	213	1224	50	50	45	50	3	21	24	45	25	25	25	21	25	24	3	50	1	1	0.9	1	0.06	84	96	0.84	0.96	84	96	0.84	0.96	0.9	['Low confidence PSD', 'Low confidence PSD', 'Low confidence PSD']	takemurasa	295477903_combined_results_cx.csv	295477903	50	50	47	50	23	24	1	1	0.94	1
ogundeyio-connection_validation-298258513_put_ADM05f(mAOTU2)_R-complete	298258513	ADM05f_pct	Roughly traced	2753	23013	49	50	42	50	1	22	20	42	25	25	25	22	25	20	1	50	0.98	1	0.84	1	0.02	88	80	0.88	0.8	88	80	0.88	0.8	0.84	['Low Confidence psd']	ogundeyio	298258513_combined_results_mb.csv	298258513	49	50	44	50	23	21	0.98	1	0.88	1
299293552_put_PDM15n	299293552	PDM15n_pct	Roughly traced	146	428	48	50	40	50	1	21	19	40	25	25	16	14	24	19	1	50	0.96	1	0.8	1	0.02	84	76	0.84	0.76	84	76	0.875	0.791666667	0.8	['Unsure if T-bar']		299293552_combined_results_1000.csv	299293552	49	50	42	50	23	19	0.98	1	0.84	1
rymert-connection_validation-300972942_MBON14(a3)(MBDLaxon1)_R_002-complete	300972942	MBON14	Roughly traced	543	13634	38	49	37	50	1	14	23	36	25	25	25	14	25	23	1	50	0.76	0.98	0.74	1	0.02	56	92	0.56	0.92	56	92	0.56	0.92	0.72	['Unsure if T-bar or PSD']	takemurasa	300972942_combined_results_mb.csv	300972942	48	50	46	50	23	23	0.96	1	0.92	1
327928411_put_PDM05i	327928411	PDM05i_pct	Roughly traced	170	730	49	50	44	50	0	22	22	44	24	26	23	21	24	21	1	50	0.98	1	0.88	1	0	91.66666667	84.61538462	0.916666667	0.846153846	91.66666667	84.61538462	0.913043478	0.875	0.88	['Autapse']		327928411_combined_results_1000.csv	327928411	49	50	43	50	23	20	0.98	1	0.86	1
ordishc-connection_validation-328533761_SMPSLP(PVF2)_R-complete	328533761	PVL17i_pct	Roughly traced	4734	8164	49	50	43	50	0	21	22	43	25	25	25	21	25	22	0	50	0.98	1	0.86	1	0	84	88	0.84	0.88	84	88	0.84	0.88	0.86	[]	rymert	328533761_combined_results_mb_retry.csv	328533761	49	50	46	49	23	23	0.98	1	0.92	0.98
ordishc-connection_validation-329289084_FB06i(SFS1)_R-complete	329289084	FB6G	Roughly traced	868	1799	49	50	45	50	0	23	22	45	25	25	25	23	25	22	0	50	0.98	1	0.9	1	0	92	88	0.92	0.88	92	88	0.92	0.88	0.9	[]	lohffa	329289084_combined_results_cx.csv	329289084	50	50	47	50	23	24	1	1	0.94	1
ordishc-connection_validation-330303073_put_ADL09b(LBDL10)_R-complete	330303073	ADL09b_a_pct	Roughly traced	84	328	50	50	43	50	0	21	22	43	25	25	25	21	25	22	0	50	1	1	0.86	1	0	84	88	0.84	0.88	84	88	0.84	0.88	0.86	[]	ordishc	330303073_combined_results_mb_retry.csv	330303073	49	50	44	50	23	21	0.98	1	0.88	1
ordishc-connection_validation-359892669_put_ADL16i(LBDL8)_R-complete	359892669	ADL16oa_pct	Roughly traced	506	2500	50	50	48	50	0	24	24	48	25	25	25	24	25	24	0	50	1	1	0.96	1	0	96	96	0.96	0.96	96	96	0.96	0.96	0.96	[]	lohffa	359892669_combined_results_mb_retry.csv	359892669	50	50	46	50	23	23	1	1	0.92	1
ogundeyio-connection_validation-362715189_FB05h(SFS1)_R-complete	362715189	FB5H	Roughly traced	1443	4617	50	50	38	50	4	21	17	38	25	25	25	21	25	17	4	50	1	1	0.76	1	0.08	84	68	0.84	0.68	84	68	0.84	0.68	0.76	['Low Confidence psd', 'Very Low Confidence psd', 'Very Low Confidence psd', 'Low Confidence psd']	smithc	362715189_combined_results_cx.csv	362715189	50	50	41	50	23	18	1	1	0.82	1
ordishc-connection_validation-386280932_FBQ7b_C7_R-complete	386280932	FC2B	Roughly traced	200	2292	50	50	44	49	0	21	23	44	25	25	25	21	25	23	0	50	1	1	0.88	0.98	0	84	92	0.84	0.92	84	92	0.84	0.92	0.88	[]	ogundeyio	386280932_combined_results_cx.csv	386280932	50	50	45	50	23	22	1	1	0.9	1
rymert-connection_validation-386842280_put_ADL20d(LBDL13)_R-complete	386842280	ADL20k_pct	Roughly traced	183	1166	50	50	42	50	0	21	21	42	25	25	25	21	25	21	0	50	1	1	0.84	1	0	84	84	0.84	0.84	84	84	0.84	0.84	0.84	[]	ordishc	386842280_combined_results_mb_retry.csv	386842280	50	50	46	50	23	23	1	1	0.92	1
ogundeyio-connection_validation-388280610_(pSIPB1)_R-complete	388280610	PDM11g_pct	Roughly traced	97	486	50	50	36	50	3	21	15	36	25	25	25	21	25	15	4	50	1	1	0.72	1	0.06	84	60	0.84	0.6	84	60	0.84	0.6	0.72	['Low Confidence psd', 'Low Confidence psd', 'Low Confidence psd', 'Low Confidence psd']	lohffa	388280610_combined_results_mb_retry.csv	388280610	50	50	41	50	23	18	1	1	0.82	1
ordishc-connection_validation-418970123_(pSIPB1)_R-complete	418970123	PDM11d_pct	Roughly traced	90	387	49	50	43	50	0	22	21	43	25	25	25	22	25	21	0	50	0.98	1	0.86	1	0	88	84	0.88	0.84	88	84	0.88	0.84	0.86	[]	lohffa	418970123_combined_results_mb_retry.csv	418970123	49	50	47	50	23	24	0.98	1	0.94	1
420252614_put_ADL03mH	420252614	ADL03ok_pct	Roughly traced	214	528	49	50	45	50	2	23	22	45	25	25	22	22	21	19	3	50	0.98	1	0.9	1	0.04	92	88	0.92	0.88	92	88	1	0.904761905	0.9	['PSD not valid?', 'low confidence PSD placement', 'T-bar and PSD not valid?']		420252614_combined_results_1000.csv	420252614	49	50	46	50	23	23	0.98	1	0.92	1
smithc-connection_validation-421041565_put_ADM12e(AMcir1)_R-complete	421041565	ADM12e_pct	Roughly traced	737	2305	48	50	41	50	1	22	19	41	25	25	25	22	25	19	2	50	0.96	1	0.82	1	0.02	88	76	0.88	0.76	88	76	0.88	0.76	0.82	['Not sure T-bar glyph is on a valid T-bar', 'T-bar glyph is not on a T-bar']	takemurasa	421041565_combined_results_mb_retry.csv	421041565	48	50	42	50	23	19	0.96	1	0.84	1
lohffa-connection_validation-424789697_MBON02(B2B'2a)(aSMPB)_R-complete	424789697	MBON02	Traced	1155	19555	49	49	44	50	1	22	22	44	25	25	25	22	25	22	4	50	0.98	0.98	0.88	1	0.02	88	88	0.88	0.88	88	88	0.88	0.88	0.88	['T-bar belongs to different body', 'PSD not valid?', 'PSD affected by nearby T-bar', 'low confidence PSD placement']	lohffa	424789697_combined_results_mb_retry.csv	424789697	49	49	46	50	23	23	0.98	0.98	0.92	1
453436589_put_PDM22t	453436589	PDM22t_pct	Roughly traced	218	649	47	50	42	50	3	22	20	42	25	25	21	20	23	19	3	50	0.94	1	0.84	1	0.06	88	80	0.88	0.8	88	80	0.952380952	0.826086957	0.84	['Low Confidence psd', 'Low Confidence psd', 'Low Confidence Tbar']		453436589_combined_results_1000.csv	453436589	48	50	43	50	23	20	0.96	1	0.86	1
lohffa-connection_validation-457196643_MBON16_like(a'3a)(SFS1)_R-complete	457196643	MBON28	Traced	385	3632	49	50	45	49	1	21	24	44	25	25	25	21	25	24	1	50	0.98	1	0.9	0.98	0.02	84	96	0.84	0.96	84	96	0.84	0.96	0.88	['PSD not valid?']	ordishc	457196643_combined_results_mb.csv	457196643	49	50	48	49	23	25	0.98	1	0.96	0.98
lohffa-connection_validation-483712161_put_ADL05c(LBDL11)_R-complete	483712161	ADL05x_pct	Traced	2334	7386	50	50	47	50	3	23	24	47	25	25	25	23	25	24	4	50	1	1	0.94	1	0.06	92	96	0.92	0.96	92	96	0.92	0.96	0.94	['PSD not valid?', 'PSD not valid?', 'PSD not valid?', 'low confidence PSD placement']	rymert	483712161_combined_results_mb.csv	483712161	50	50	47	50	23	24	1	1	0.94	1
ordishc-connection_validation-484130600_put_ADM10a(ABDL)_R-complete	484130600	ADM10a_pct	Roughly traced	2202	3529	49	50	35	50	0	19	16	35	25	25	25	19	25	16	0	50	0.98	1	0.7	1	0	76	64	0.76	0.64	76	64	0.76	0.64	0.7	[]	lohffa	484130600_combined_results_mb_retry.csv	484130600	50	50	41	50	23	18	1	1	0.82	1
ordishc-connection_validation-486073415_(mLALT2)_L-complete	486073415	AVM15k_pct	Roughly traced	370	680	49	50	40	50	0	23	17	40	25	25	25	23	25	17	0	50	0.98	1	0.8	1	0	92	68	0.92	0.68	92	68	0.92	0.68	0.8	[]	ogundeyio	486073415_combined_results_mb_retry.csv	486073415	49	50	42	49	23	19	0.98	1	0.84	0.98
rymert-connection_validation-516055524_(AEF4)_R-complete	516055524	AVL06n_pct	Roughly traced	2957	6069	50	50	46	50	1	23	23	46	25	25	25	23	25	23	1	50	1	1	0.92	1	0.02	92	92	0.92	0.92	92	92	0.92	0.92	0.92	['PSD on edge of cleft']	ordishc	516055524_combined_results_mb.csv	516055524	47	49	45	50	23	22	0.94	0.98	0.9	1
rymert-connection_validation-517506265_put_ADL16r(LBDL8)_R-complete	517506265	ADL16r_pct	Traced	1196	6420	50	50	44	50	1	21	23	44	25	25	25	21	25	23	0	50	1	1	0.88	1	0.02	84	92	0.84	0.92	84	92	0.84	0.92	0.88	[]	smithc	517506265_combined_results_mb_retry.csv	517506265	50	50	47	50	23	24	1	1	0.94	1
rymert-connection_validation-517514142_PPL104(a'3)(SFS1)_R-complete	517514142	PPL104	Roughly traced	1546	4598	50	50	43	49	0	21	22	43	24	26	24	21	26	22	1	50	1	1	0.86	0.98	0	87.5	84.61538462	0.875	0.846153846	87.5	84.61538462	0.875	0.846153846	0.86	['Autapse']	takemurasa	517514142_combined_results_mb_retry.csv	517514142	50	50	43	49	23	20	1	1	0.86	0.98
517842578_put_ADL15k	517842578	ADL15k_pct	Roughly traced	291	548	49	50	46	50	2	21	25	46	25	25	21	19	23	23	2	50	0.98	1	0.92	1	0.04	84	100	0.84	1	84	100	0.904761905	1	0.92	['Unsure if T-bar', 'cleft obscured by hotknife']		517842578_combined_results_1000.csv	517842578	49	50	47	50	23	24	0.98	1	0.94	1
519616809_put_PDL05z	519616809	PDL05z_pct	Roughly traced	518	1198	49	50	48	50	5	24	24	48	25	25	24	24	23	22	7	50	0.98	1	0.96	1	0.1	96	96	0.96	0.96	96	96	1	0.956521739	0.96	['PSD not valid?', 'low confidence PSD placement', 'PSD not valid?', 'PSD not valid?', 'low confidence PSD placement', 'PSD not valid?', 'PSD not valid?']		519616809_combined_results_1000.csv	519616809	49	50	46	50	23	23	0.98	1	0.92	1
ordishc-connection_validation-544038123_(mLALT1)_L-complete	544038123	AVM18h_pct	Roughly traced	3025	7264	50	50	42	50	0	24	18	42	25	25	25	24	25	18	0	50	1	1	0.84	1	0	96	72	0.96	0.72	96	72	0.96	0.72	0.84	[]	ogundeyio	544038123_combined_results_mb_retry.csv	544038123	50	50	43	50	23	20	1	1	0.86	1
ordishc-connection_validation-544107335_put_ADL15h(hLHT2)_R-complete	544107335	ADL15p_a_pct	Traced	306	1230	50	50	42	50	0	21	21	42	25	25	25	21	25	21	0	50	1	1	0.84	1	0	84	84	0.84	0.84	84	84	0.84	0.84	0.84	[]	ordishc	544107335_combined_results_mb_retry.csv	544107335	50	50	45	49	23	22	1	1	0.9	0.98
rymert-connection_validation-551043841_put_ADM07vB(aSMPB)_L-complete	551043841	ADM07oo_pct	Roughly traced	252	750	50	50	42	49	2	23	19	42	25	25	25	23	25	19	2	50	1	1	0.84	0.98	0.04	92	76	0.92	0.76	92	76	0.92	0.76	0.84	['PSD on hotknife', 'Unsure if T-bar']	takemurasa	551043841_combined_results_mb_retry.csv	551043841	50	50	41	49	23	18	1	1	0.82	0.98
lohffa-connection_validation-576079106_put_ADL25g(dlEA)_R-complete	576079106	ADL25g_pct	Roughly traced	562	1685	47	50	44	49	3	22	22	43	25	25	25	22	25	22	3	50	0.94	1	0.88	0.98	0.06	88	88	0.88	0.88	88	88	0.88	0.88	0.86	['PSD not valid?', 'PSD not valid?', 'PSD not valid?']	ogundeyio	576079106_combined_results_mb_retry.csv	576079106	47	50	46	50	23	23	0.94	1	0.92	1
lohffa-connection_validation-581060581_put_ADM07oa(aSMPB)_R-complete	581060581	ADM07oa_pct	Roughly traced	325	1795	50	50	40	48	3	20	20	39	26	24	26	20	24	20	4	50	1	1	0.8	0.96	0.06	76.92307692	83.33333333	0.769230769	0.833333333	76.92307692	83.33333333	0.769230769	0.833333333	0.78	['PSD not valid?', 'low confidence PSD placement', 'T-bar not valid?', 'PSD not valid?']	ogundeyio	581060581_combined_results_mb_retry.csv	581060581	49	50	43	49	23	20	0.98	1	0.86	0.98
rymert-connection_validation-601470598_FB_RUB_C5_R-complete	601470598	FR_a	Roughly traced	166	1965	48	49	44	50	3	21	23	43	25	25	25	21	25	23	5	50	0.96	0.98	0.88	1	0.06	84	92	0.84	0.92	84	92	0.84	0.92	0.86	['T-bar needs merge + split', 'Unsure if T-bar', 'Unsure if Tbar or PSD', 'Unsure if Tbar or density', 'PSD very far away']	smithc	601470598_combined_results_cx.csv	601470598	48	49	47	50	23	24	0.96	0.98	0.94	1
takemurasa-connection_validation-602852509_FB_RUB_C7_R-complete	602852509	FR_a	Roughly traced	187	1832	49	50	40	50	0	21	19	40	25	25	25	21	25	19	4	50	0.98	1	0.8	1	0	84	76	0.84	0.76	84	76	0.84	0.76	0.8	['Low confidence Tbar', 'Low confidence Tbar', 'Low confidence PSD', 'Low confidence Tbar']	rymert	602852509_combined_results_cx.csv	602852509	50	50	45	50	23	22	1	1	0.9	1
smithc-connection_validation-609656444_put_ADM08b(agL1)_R-complete	609656444	ADM08b_pct	Roughly traced	1635	2564	48	50	39	50	2	22	17	39	25	25	25	22	25	17	2	50	0.96	1	0.78	1	0.04	88	68	0.88	0.68	88	68	0.88	0.68	0.78	['Not sure T-bar glyph is on a valid T-bar', 'Not sure T-bar glyph is on a valid T-bar']	lohffa	609656444_combined_results_mb_retry.csv	609656444	48	50	40	50	23	17	0.96	1	0.8	1
ogundeyio-connection_validation-612712334_put_ADL15b(hLHT2)_R-complete	612712334	ADL15b_pct	Traced	324	1548	49	50	40	50	4	20	20	40	25	25	25	20	25	20	4	50	0.98	1	0.8	1	0.08	80	80	0.8	0.8	80	80	0.8	0.8	0.8	['Low Confidence psd', 'Low Confidence psd', 'Low Confidence psd', 'Low Confidence psd']	lohffa	612712334_combined_results_mb_retry.csv	612712334	49	50	42	50	23	19	0.98	1	0.84	1
rymert-connection_validation-641709938_put_ADM05q(mAOTU2)_R-complete	641709938	ADM05v_pct	Roughly traced	283	890	50	50	46	50	1	23	23	46	25	25	25	23	25	23	1	50	1	1	0.92	1	0.02	92	92	0.92	0.92	92	92	0.92	0.92	0.92	['PSD near edge of cleft']	ogundeyio	641709938_combined_results_mb.csv	641709938	50	50	46	50	23	23	1	1	0.92	1
rymert-connection_validation-642387775_put_ADM05r(mAOTU2)_R-complete	642387775	ADM05r_pct	Roughly traced	323	1867	50	50	47	50	1	24	23	47	25	25	25	24	25	23	1	50	1	1	0.94	1	0.02	96	92	0.96	0.92	96	92	0.96	0.92	0.94	['PSD near edge of cleft']	ordishc	642387775_combined_results_mb_retry.csv	642387775	50	50	47	50	23	24	1	1	0.94	1
lohffa-connection_validation-673366098_MBON16(a'3ap)(SFS1)_R-complete	673366098	MBON16	Roughly traced	449	6065	50	50	48	50	2	23	25	48	25	25	25	23	25	25	4	50	1	1	0.96	1	0.04	92	100	0.92	1	92	100	0.92	1	0.96	['PSD not valid?', 'low confidence PSD placement', 'PSD not valid?', 'Multiple T-bars, PSD affected by different T-bar glif. ']	ordishc	673366098_combined_results_mb.csv	673366098	49	50	48	50	23	25	0.98	1	0.96	1
lohffa-connection_validation-673509195_MBON01(y5B'2a)(aSMPB)_L-complete	673509195	MBON01	Traced	2204	29361	49	49	39	49	1	21	18	38	25	25	25	21	25	18	3	50	0.98	0.98	0.78	0.98	0.02	84	72	0.84	0.72	84	72	0.84	0.72	0.76	['low confidence PSD placement', 'PSD not valid?', 'low confidence PSD placement']	lohffa	673509195_combined_results_mb.csv	673509195	49	49	43	49	23	20	0.98	0.98	0.86	0.98
rymert-connection_validation-673733299_(SFS1)_R-complete	673733299	PDL05oq_pct	Roughly traced	206	399	49	50	45	50	1	24	21	45	25	25	25	24	25	21	1	50	0.98	1	0.9	1	0.02	96	84	0.96	0.84	96	84	0.96	0.84	0.9	['Unsure if PSD in cleft']	takemurasa	673733299_combined_results_mb.csv	673733299	49	50	43	50	23	20	0.98	1	0.86	1
ogundeyio-connection_validation-677182018_FB02c(aSMP)_R-complete	677182018	FB2B_b	Roughly traced	554	1776	50	50	41	50	6	20	21	41	25	25	25	20	25	21	6	50	1	1	0.82	1	0.12	80	84	0.8	0.84	80	84	0.8	0.84	0.82	['Low Confidence psd', 'Low Confidence psd', 'Low Confidence psd', 'Low Confidence Tbar and psd', 'Low Confidence psd', 'Low Confidence psd']	ogundeyio	677182018_combined_results_cx.csv	677182018	50	50	46	49	23	23	1	1	0.92	0.98
ordishc-connection_validation-707539688_FB05a(AMVF4)_R-complete	707539688	FB5A	Roughly traced	1098	5972	49	50	45	50	0	23	22	45	25	25	25	23	25	22	0	50	0.98	1	0.9	1	0	92	88	0.92	0.88	92	88	0.92	0.88	0.9	[]	takemurasa	707539688_combined_results_cx.csv	707539688	49	50	46	50	23	23	0.98	1	0.92	1
takemurasa-connection_validation-730337785_FB02r(SFS1)_R-complete	730337785	FB2J	Roughly traced	285	836	49	50	40	50	0	21	19	40	25	25	25	21	25	19	0	50	0.98	1	0.8	1	0	84	76	0.84	0.76	84	76	0.84	0.76	0.8	[]	lohffa	730337785_combined_results_cx.csv	730337785	49	50	44	50	23	21	0.98	1	0.88	1
rymert-connection_validation-734801540_FB02e(aVT1)_R-complete	734801540	FB2D	Roughly traced	604	3511	50	50	45	50	1	23	22	45	25	25	25	23	25	22	1	50	1	1	0.9	1	0.02	92	88	0.92	0.88	92	88	0.92	0.88	0.9	['PSD far away']	ogundeyio	734801540_combined_results_cx.csv	734801540	50	50	44	50	23	21	1	1	0.88	1
lohffa-connection_validation-764339062_put_ADL12a(dAOTU1)_R-complete	764339062	ADL12of_pct	Traced	484	997	48	50	46	50	3	24	22	46	25	25	25	24	25	22	4	50	0.96	1	0.92	1	0.06	96	88	0.96	0.88	96	88	0.96	0.88	0.92	['low confidence PSD placement ', 'T-bar and PSD not valid? T-bar potentially part of other T-bar?', 'PSD not valid?', 'PSD not valid?']	ogundeyio	764339062_combined_results_mb.csv	764339062	48	50	45	50	23	22	0.96	1	0.9	1
rymert-connection_validation-767904550_put_ADM06c(mAOTU3)_R-complete	767904550	ADM06c_pct	Roughly traced	794	3431	50	50	47	49	1	23	24	46	25	25	25	23	25	24	1	50	1	1	0.94	0.98	0.02	92	96	0.92	0.96	92	96	0.92	0.96	0.92	['Unsure if T-bar']	takemurasa	767904550_combined_results_mb_retry.csv	767904550	50	50	47	49	23	24	1	1	0.94	0.98
769544445_TuTuB	769544445	TuTuB	Roughly traced	273	886	49	50	45	50	1	23	22	45	25	25	23	21	25	22	1	50	0.98	1	0.9	1	0.02	92	88	0.92	0.88	92	88	0.913043478	0.88	0.9	['Unsure if T-bar']		769544445_combined_results_1000.csv	769544445	48	50	43	50	23	20	0.96	1	0.86	1
ordishc-connection_validation-792368888_MBON20(y1y2)(A14)_R.json-complete	792368888	MBON20	Traced	1988	6123	46	50	38	50	0	21	17	38	25	25	25	21	25	17	0	50	0.92	1	0.76	1	0	84	68	0.84	0.68	84	68	0.84	0.68	0.76	[]	takemurasa	792368888_combined_results_mb_retry.csv	792368888	46	49	40	49	23	17	0.92	0.98	0.8	0.98
797216807_put_ADM05kE	797216807	ADM05oc_pct	Roughly traced	208	623	50	50	42	50	2	23	19	42	25	25	23	22	22	17	2	50	1	1	0.84	1	0.04	92	76	0.92	0.76	92	76	0.956521739	0.772727273	0.84	['Unsure if PSD makes it in cleft', 'Unsure if PSD makes it in cleft']		797216807_combined_results_1000.csv	797216807	50	50	43	50	23	20	1	1	0.86	1
ordishc-connection_validation-819751391_FBQ6a_C7_R-complete	819751391	FC1_a	Roughly traced	150	607	49	50	45	50	0	22	23	45	25	25	25	22	25	23	0	50	0.98	1	0.9	1	0	88	92	0.88	0.92	88	92	0.88	0.92	0.9	[]	rymert	819751391_combined_results_cx.csv	819751391	48	50	47	50	23	24	0.96	1	0.94	1
ordishc-connection_validation-822692353_(LEA2)_R-complete	822692353	AVL18c_pct	Roughly traced	440	778	49	49	44	49	0	23	21	42	25	25	25	23	25	21	0	50	0.98	0.98	0.88	0.98	0	92	84	0.92	0.84	92	84	0.92	0.84	0.84	[]	takemurasa	822692353_combined_results_mb.csv	822692353	48	49	43	50	23	20	0.96	0.98	0.86	1
ordishc-connection_validation-829261936_PAM12(y3)(agL1)_R-complete	829261936	PAM12	Traced	229	1315	50	49	40	50	0	21	19	39	25	25	25	21	25	19	0	50	1	0.98	0.8	1	0	84	76	0.84	0.76	84	76	0.84	0.76	0.78	[]	ordishc	829261936_combined_results_mb.csv	829261936	50	49	43	50	23	20	1	0.98	0.86	1
lohffa-connection_validation-855250466_FB09g(pSM6)_R-complete	855250466	FB9C_a	Roughly traced	115	609	49	45	47	48	2	23	24	42	25	25	25	23	25	24	3	50	0.98	0.9	0.94	0.96	0.04	92	96	0.92	0.96	92	96	0.92	0.96	0.84	['PSD not valid?', 'PSD not valid?', 'low confidence PSD placement']	ogundeyio	855250466_combined_results_cx.csv	855250466	49	47	47	48	23	24	0.98	0.94	0.94	0.96
ogundeyio-connection_validation-858933153_FB04a(aVT1)_R-complete	858933153	FB4A	Roughly traced	145	1503	50	50	43	50	4	23	20	43	25	25	25	23	25	20	5	50	1	1	0.86	1	0.08	92	80	0.92	0.8	92	80	0.92	0.8	0.86	['Low Confidence psd', 'Low Confidence psd', 'Low Confience psd', 'Low Confidence psd', 'Low Confidence psd']	ordishc	858933153_combined_results_cx.csv	858933153	50	50	45	50	23	22	1	1	0.9	1
lohffa-connection_validation-859265651_CRE_SMP(SFS1)_R-complete	859265651	PDL05s_pct	Roughly traced	5032	11878	50	50	46	50	2	22	24	46	25	25	25	22	25	24	10	50	1	1	0.92	1	0.04	88	96	0.88	0.96	88	96	0.88	0.96	0.92	['low confidence PSD placement', 'low confidence PSD placement', 'PSD not valid?', 'PSD not valid?', 'low confidence PSD placement', 'low confidence PSD placement', 'low confidence PSD placement', 'low confidence PSD placement', 'low confidence PSD placement', 'low confidence PSD placement']	lohffa	859265651_combined_results_mb.csv	859265651	50	50	45	50	23	22	1	1	0.9	1
takemurasa-connection_validation-879442155_PB03_R5-complete	879442155	PFNa	Roughly traced	200	927	46	50	41	50	1	22	19	41	25	25	25	22	25	19	1	50	0.92	1	0.82	1	0.02	88	76	0.88	0.76	88	76	0.88	0.76	0.82	['Low confidence PSD']	lohffa	879442155_combined_results_cx.csv	879442155	46	50	42	50	23	19	0.92	1	0.84	1
smithc-connection_validation-884916654_FB07c(SFS1)_R-complete	884916654	FB7L	Roughly traced	497	1865	48	50	46	50	1	23	23	46	25	25	25	23	25	23	2	50	0.96	1	0.92	1	0.02	92	92	0.92	0.92	92	92	0.92	0.92	0.92	['T-bar glyph is not on a valid T-bar', 'Not sure that T-bar glyph is on a valid T-bar']	lohffa	884916654_combined_results_cx.csv	884916654	47	50	44	50	23	21	0.94	1	0.88	1
ordishc-connection_validation-886280641_FB09c(igL1)_R-complete	886280641	FB9B_a	Roughly traced	78	176	49	50	45	50	0	22	23	45	25	25	25	22	25	23	0	50	0.98	1	0.9	1	0	88	92	0.88	0.92	88	92	0.88	0.92	0.9	[]	rymert	886280641_combined_results_cx.csv	886280641	48	50	45	50	23	22	0.96	1	0.9	1
ordishc-connection_validation-886280843_Delta0a(AB)-complete	886280843	Delta0A_a	Roughly traced	93	472	50	50	47	50	0	23	24	47	25	25	25	23	25	24	0	50	1	1	0.94	1	0	92	96	0.92	0.96	92	96	0.92	0.96	0.94	[]	takemurasa	886280843_combined_results_cx.csv	886280843	50	50	48	50	23	25	1	1	0.96	1
takemurasa-connection_validation-886289222_Delta0a-complete	886289222	Delta0A_a	Roughly traced	80	302	49	50	43	50	0	20	23	43	25	25	25	20	25	23	0	50	0.98	1	0.86	1	0	80	92	0.8	0.92	80	92	0.8	0.92	0.86	[]	ordishc	886289222_combined_results_cx.csv	886289222	49	50	47	50	23	24	0.98	1	0.94	1
takemurasa-connection_validation-886626370_FB09b(igL1)_R-complete	886626370	FB9B_c	Roughly traced	40	211	48	50	43	50	3	22	21	43	25	25	25	22	25	21	3	50	0.96	1	0.86	1	0.06	88	84	0.88	0.84	88	84	0.88	0.84	0.86	['Low confidence PSD', 'Low confidence PSD', 'Low confidence PSD']	rymert	886626370_combined_results_cx.csv	886626370	48	50	44	50	23	21	0.96	1	0.88	1
takemurasa-connection_validation-893741163_FB04oc(igL1)_R-complete	893741163	FB4P_a	Roughly traced	597	2738	47	50	42	50	0	21	21	42	25	25	25	21	25	21	2	50	0.94	1	0.84	1	0	84	84	0.84	0.84	84	84	0.84	0.84	0.84	['Low confidence Tbar and PSD', 'Low confidence PSD']	lohffa	893741163_combined_results_cx.csv	893741163	49	50	45	50	23	22	0.98	1	0.9	1
takemurasa-connection_validation-908728886_FB_Q6b_C4_R-complete	908728886	FC1_c	Roughly traced	112	489	49	50	44	49	0	23	21	44	25	25	25	23	25	21	2	50	0.98	1	0.88	0.98	0	92	84	0.92	0.84	92	84	0.92	0.84	0.88	['Split needed at (23824, 18653, 19436)', 'Low confidence PSD']	ordishc	908728886_combined_results_cx.csv	908728886	49	50	46	49	23	23	0.98	1	0.92	0.98
ordishc-connection_validation-915605943_FB06u(aVT1)_R-complete	915605943	FB6P	Roughly traced	241	1995	49	49	41	49	0	20	21	41	25	25	25	20	25	21	0	50	0.98	0.98	0.82	0.98	0	80	84	0.8	0.84	80	84	0.8	0.84	0.82	[]	ordishc	915605943_combined_results_cx.csv	915605943	49	50	46	50	23	23	0.98	1	0.92	1
ogundeyio-connection_validation-915610561_FB06b(SFS1)_R-complete	915610561	FB6B	Roughly traced	651	2291	49	50	43	50	1	23	20	43	25	25	25	23	25	20	1	50	0.98	1	0.86	1	0.02	92	80	0.92	0.8	92	80	0.92	0.8	0.86	['Low Confidence Tbar']	lohffa	915610561_combined_results_cx.csv	915610561	49	50	45	50	23	22	0.98	1	0.9	1
rymert-connection_validation-916288692_FB_Q10c_C4_L.json-complete	916288692	FS2B	Roughly traced	111	916	48	49	45	49	1	24	21	45	25	25	25	24	25	21	3	50	0.96	0.98	0.9	0.98	0.02	96	84	0.96	0.84	96	84	0.96	0.84	0.9	['low confidence', 'Unsure if Tbar glyph is correct', 'low confidence']	rymert	916288692_combined_results_cx.csv	916288692	48	49	44	49	23	21	0.96	0.98	0.88	0.98
takemurasa-connection_validation-940787029_PB17_R6-complete	940787029	IbSpsP	Roughly traced	241	550	47	50	43	50	2	22	21	43	25	25	25	22	25	21	3	50	0.94	1	0.86	1	0.04	88	84	0.88	0.84	88	84	0.88	0.84	0.86	['Low confidence PSD', 'Not a Tbar, but PSD', 'Low confidence PSD']	takemurasa	940787029_combined_results_cx.csv	940787029	48	50	44	50	23	21	0.96	1	0.88	1
smithc-connection_validation-949986251_FB02j(SFS1)_R-complete	949986251	FB2F_c	Roughly traced	313	570	49	50	41	50	1	23	18	41	25	25	25	23	25	18	1	50	0.98	1	0.82	1	0.02	92	72	0.92	0.72	92	72	0.92	0.72	0.82	['Not sure the T-bar glyph is on a valid T-bar']	smithc	949986251_combined_results_cx.csv	949986251	49	50	44	50	23	21	0.98	1	0.88	1
rymert-connection_validation-956820684_(aLAL1)_R-complete	956820684	AVM16f_pct	Roughly traced	223	638	48	50	44	50	0	22	22	44	25	25	25	22	25	22	0	50	0.96	1	0.88	1	0	88	88	0.88	0.88	88	88	0.88	0.88	0.88	[]	takemurasa	956820684_combined_results_mb_retry.csv	956820684	48	50	45	50	23	22	0.96	1	0.9	1
lohffa-connection_validation-957131025_put_ADM10m(ABDL)_R-complete	957131025	ADM10m_pct	Roughly traced	196	1403	50	50	43	49	0	21	22	43	25	25	25	21	25	22	0	50	1	1	0.86	0.98	0	84	88	0.84	0.88	84	88	0.84	0.88	0.86	[]	rymert	957131025_combined_results_mb.csv	957131025	50	50	45	49	23	22	1	1	0.9	0.98
smithc-connection_validation-957506896_FB04Bb(aVT1)_R-complete	957506896	FB5W	Roughly traced	297	1156	48	50	43	50	1	23	20	43	25	25	25	23	25	20	2	50	0.96	1	0.86	1	0.02	92	80	0.92	0.8	92	80	0.92	0.8	0.86	['Not sure the T-bar glyph is on a valid T-bar', 'T-bar glyph is not on a real T-bar']	ordishc	957506896_combined_results_cx.csv	957506896	48	50	43	50	23	20	0.96	1	0.86	1
ordishc-connection_validation-972513129_PB14_R-complete	972513129	P6-8P9	Roughly traced	104	685	48	50	48	50	0	24	24	48	25	25	25	24	25	24	0	50	0.96	1	0.96	1	0	96	96	0.96	0.96	96	96	0.96	0.96	0.96	[]	takemurasa	972513129_combined_results_cx.csv	972513129	48	50	47	50	23	24	0.96	1	0.94	1
takemurasa-connection_validation-976997912_FB_Q8_C5_R-complete	976997912	FC3	Roughly traced	138	671	48	50	39	50	0	22	17	39	25	25	25	22	25	17	0	50	0.96	1	0.78	1	0	88	68	0.88	0.68	88	68	0.88	0.68	0.78	[]	smithc	976997912_combined_results_cx.csv	976997912	50	50	43	50	23	20	1	1	0.86	1
smithc-connection_validation-977006924_FB05Bb(igL1)_R-complete	977006924	FB5Z	Roughly traced	343	1299	49	50	44	50	1	23	21	44	25	25	25	23	25	21	1	50	0.98	1	0.88	1	0.02	92	84	0.92	0.84	92	84	0.92	0.84	0.88	['Not sure that the T-bar glyph is on a valid T-bar']	ordishc	977006924_combined_results_cx.csv	977006924	50	50	44	50	23	21	1	1	0.88	1
rymert-connection_validation-977339122_FB05m(aVT1)_R-complete	977339122	FB5L	Roughly traced	749	2779	49	50	42	49	3	20	22	40	25	25	25	20	25	22	3	50	0.98	1	0.84	0.98	0.06	80	88	0.8	0.88	80	88	0.8	0.88	0.8	['PSD on edge of cleft', 'PSD on edge of cleft', 'Unsure if T-bar']	takemurasa	977339122_combined_results_cx.csv	977339122	49	50	48	49	23	25	0.98	1	0.96	0.98
rymert-connection_validation-984536209_LL_R(AMVF3)_R-complete	984536209	AVM14a_pct	Roughly traced	1173	3608	49	50	44	49	1	23	21	43	25	25	25	23	25	21	1	50	0.98	1	0.88	0.98	0.02	92	84	0.92	0.84	92	84	0.92	0.84	0.86	["T-bar looks like PSD, but can't see a T-bar"]	lohffa	984536209_combined_results_mb.csv	984536209	49	50	47	49	23	24	0.98	1	0.94	0.98
rymert-connection_validation-1009004209_put_ADL08i(sgL1)_R-complete	1009004209	ADL08i_a_pct	Roughly traced	181	630	49	50	48	49	1	23	25	47	25	25	25	23	25	25	1	50	0.98	1	0.96	0.98	0.02	92	100	0.92	1	92	100	0.92	1	0.94	['Hotknife obscures view of synapse']	ogundeyio	1009004209_combined_results_mb.csv	1009004209	49	50	47	49	23	24	0.98	1	0.94	0.98
lohffa-connection_validation-1013346945_put_AVL02m(AVF1)_R-complete	1013346945	AVL02ll_pct	Roughly traced	242	706	49	50	44	50	3	21	23	44	25	25	25	21	25	23	8	50	0.98	1	0.88	1	0.06	84	92	0.84	0.92	84	92	0.84	0.92	0.88	['low confidence PSD placement', 'low confidence PSD placement', 'PSD not valid?', 'low confidence PSD placement', 'low confidence PSD placement', 'PSD not valid?', 'low confidence PSD placement', 'PSD not valid?']	ordishc	1013346945_combined_results_mb_retry.csv	1013346945	49	50	47	50	23	24	0.98	1	0.94	1
rymert-connection_validation-1038926500_(iPB6)_R-complete	1038926500	PDM26a_pct	Roughly traced	734	2277	50	50	46	50	0	23	23	46	25	25	25	23	25	23	0	50	1	1	0.92	1	0	92	92	0.92	0.92	92	92	0.92	0.92	0.92	[]	lohffa	1038926500_combined_results_mb.csv	1038926500	50	50	47	50	23	24	1	1	0.94	1
ordishc-connection_validation-1048172314_PPL103(y2a'1)(SFS1)_L-complete	1048172314	PPL103	Roughly traced	3488	12099	48	50	48	49	0	24	24	47	25	25	25	24	25	24	0	50	0.96	1	0.96	0.98	0	96	96	0.96	0.96	96	96	0.96	0.96	0.94	[]	takemurasa	1048172314_combined_results_mb.csv	1048172314	48	50	47	49	23	24	0.96	1	0.94	0.98
takemurasa-connection_validation-1072442312_Delta0b-complete	1072442312	Delta0C	Roughly traced	109	440	50	50	47	50	1	23	24	47	25	25	25	23	25	24	1	50	1	1	0.94	1	0.02	92	96	0.92	0.96	92	96	0.92	0.96	0.94	['Low confidence PSD']	smithc	1072442312_combined_results_cx.csv	1072442312	50	50	46	50	23	23	1	1	0.92	1
lohffa-connection_validation-1072818198_FB_Q7a_C4_R-complete	1072818198	FC2A	Roughly traced	255	2245	49	48	46	50	2	23	23	44	25	25	25	23	25	23	4	50	0.98	0.96	0.92	1	0.04	92	92	0.92	0.92	92	92	0.92	0.92	0.88	['low confidence PSD placement', 'PSD not valid?', 'T-bar not valid?', 'low confidence PSD placement']	ordishc	1072818198_combined_results_cx.csv	1072818198	49	48	44	50	23	21	0.98	0.96	0.88	1
takemurasa-connection_validation-1072865814_FB_Q10c_C7_L-complete	1072865814	FS2B	Roughly traced	74	550	48	50	44	50	0	22	22	44	25	25	25	22	25	22	4	50	0.96	1	0.88	1	0	88	88	0.88	0.88	88	88	0.88	0.88	0.88	['Low confidence PSD', 'Low confidence PSD', 'Low confidence PSD', 'Low confidence PSD']	lohffa	1072865814_combined_results_cx.csv	1072865814	50	50	47	49	23	24	1	1	0.94	0.98
ordishc-connection_validation-1073461640_FBQ11_C2_R-complete	1073461640	FS3A	Roughly traced	44	299	50	50	43	49	0	21	22	43	25	25	25	21	25	22	0	50	1	1	0.86	0.98	0	84	88	0.84	0.88	84	88	0.84	0.88	0.86	[]	lohffa	1073461640_combined_results_cx.csv	1073461640	49	49	43	49	23	20	0.98	0.98	0.86	0.98
lohffa-connection_validation-1093552596_FB_Q7a_C2_R-complete	1093552596	FC2A	Roughly traced	257	1975	48	48	45	48	3	21	24	42	25	25	25	21	25	24	4	50	0.96	0.96	0.9	0.96	0.06	84	96	0.84	0.96	84	96	0.84	0.96	0.84	['PSD not valid?', 'low confidence PSD placement', 'PSD not valid?', 'PSD not valid?']	smithc	1093552596_combined_results_cx.csv	1093552596	48	49	46	48	23	23	0.96	0.98	0.92	0.96
takemurasa-connection_validation-1098737385_FB_Q6b_C7_R-complete	1098737385	FC1_c	Roughly traced	128	617	49	50	41	50	0	23	18	41	26	24	26	23	24	18	2	50	0.98	1	0.82	1	0	88.46153846	75	0.884615385	0.75	88.46153846	75	0.884615385	0.75	0.82	['Low confidence PSD', 'Low confidence PSD']	lohffa	1098737385_combined_results_cx.csv	1098737385	50	50	46	50	23	23	1	1	0.92	1
ordishc-connection_validation-1100797044_Delta6b_01-complete	1100797044	Delta6B	Roughly traced	761	3063	50	50	45	49	0	24	21	44	25	25	25	24	25	21	1	50	1	1	0.9	0.98	0	96	84	0.96	0.84	96	84	0.96	0.84	0.88	['HK']	lohffa	1100797044_combined_results_cx.csv	1100797044	50	50	47	49	23	24	1	1	0.94	0.98
lohffa-connection_validation-1100801188_FB04d(aVT1)_R-complete	1100801188	FB4D	Roughly traced	379	1595	49	48	43	49	4	22	21	40	25	25	25	22	25	21	5	50	0.98	0.96	0.86	0.98	0.08	88	84	0.88	0.84	88	84	0.88	0.84	0.8	['low confidence PSD placement', 'PSD not valid?', 'PSD not valid?', 'PSD not valid?', 'PSD is affected, possibly by a T-bar not marked']	lohffa	1100801188_combined_results_cx.csv	1100801188	48	49	44	49	23	21	0.96	0.98	0.88	0.98
lohffa-connection_validation-1102454255_FB_Q8_C3_R-complete	1102454255	FC3	Roughly traced	182	969	49	46	45	48	1	21	24	40	25	25	25	21	25	24	1	50	0.98	0.92	0.9	0.96	0.02	84	96	0.84	0.96	84	96	0.84	0.96	0.8	['PSD not valid?']	rymert	1102454255_combined_results_cx.csv	1102454255	48	46	46	48	23	23	0.96	0.92	0.92	0.96
takemurasa-connection_validation-1103576992_FB_Q12a_C8_R-complete	1103576992	FS4A	Roughly traced	55	301	50	50	44	49	0	21	23	44	25	25	25	21	25	23	2	50	1	1	0.88	0.98	0	84	92	0.84	0.92	84	92	0.84	0.92	0.88	['Low confidence PSD', 'Split needed at (33192, 22210, 6134)']	smithc	1103576992_combined_results_cx.csv	1103576992	50	50	45	49	23	22	1	1	0.9	0.98
ordishc-connection_validation-1103577592_FBQ7d_C8_R-complete	1103577592	FC2D	Roughly traced	149	1465	50	50	42	50	0	21	21	42	25	25	25	21	25	21	0	50	1	1	0.84	1	0	84	84	0.84	0.84	84	84	0.84	0.84	0.84	[]	takemurasa	1103577592_combined_results_cx.csv	1103577592	50	50	47	49	23	24	1	1	0.94	0.98
smithc-connection_validation-1131831702_FB04v(pFBB2)_R-complete	1131831702	FB4K	Roughly traced	426	1652	50	50	46	50	0	23	23	46	25	25	25	23	25	23	0	50	1	1	0.92	1	0	92	92	0.92	0.92	92	92	0.92	0.92	0.92	[]	takemurasa	1131831702_combined_results_cx.csv	1131831702	50	50	48	50	23	25	1	1	0.96	1
ordishc-connection_validation-1131840673_FB04of(igL1)_R-complete	1131840673	FB4R	Roughly traced	426	1345	49	50	42	49	0	22	20	41	25	25	25	22	25	20	0	50	0.98	1	0.84	0.98	0	88	80	0.88	0.8	88	80	0.88	0.8	0.82	[]	ordishc	1131840673_combined_results_cx.csv	1131840673	49	50	46	49	23	23	0.98	1	0.92	0.98
ordishc-connection_validation-1132189788_FBQ6b_C6_R-complete	1132189788	FC1_c	Roughly traced	128	531	50	50	44	50	0	21	23	44	25	25	25	21	25	23	0	50	1	1	0.88	1	0	84	92	0.84	0.92	84	92	0.84	0.92	0.88	[]	smithc	1132189788_combined_results_cx.csv	1132189788	50	50	47	50	23	24	1	1	0.94	1
ordishc-connection_validation-1132526832_FB04g(aVT1)_R-complete	1132526832	FB4F_b	Roughly traced	297	1715	49	50	46	50	0	24	22	46	25	25	25	24	25	22	0	50	0.98	1	0.92	1	0	96	88	0.96	0.88	96	88	0.96	0.88	0.92	[]	takemurasa	1132526832_combined_results_cx.csv	1132526832	49	50	47	50	23	24	0.98	1	0.94	1
ordishc-connection_validation-1167891559_R4dB(ring)(igL2)_R-complete	1167891559	R4d_b	Traced	613	2129	50	50	46	50	0	23	23	46	25	25	25	23	25	23	0	50	1	1	0.92	1	0	92	92	0.92	0.92	92	92	0.92	0.92	0.92	[]	ordishc	1167891559_combined_results_cx.csv	1167891559	50	50	48	50	23	25	1	1	0.96	1
lohffa-connection_validation-1168664374_FB_RUB_C1_R-complete	1168664374	FR_a	Roughly traced	230	1937	49	48	46	49	1	23	23	43	25	25	25	23	25	23	5	50	0.98	0.96	0.92	0.98	0.02	92	92	0.92	0.92	92	92	0.92	0.92	0.86	['low confidence PSD placement', 'low confidence PSD placement', 'Glif is placed in horrible spot, difficult to distinguish which body it belongs to.', 'Glif placed on incorrect body', 'PSD not valid?']	ogundeyio	1168664374_combined_results_cx.csv	1168664374	49	48	48	49	23	25	0.98	0.96	0.96	0.98
ordishc-connection_validation-1169169208_(PLPF8)_R-complete	1169169208	PVL19c_pct	Roughly traced	298	1335	48	50	43	49	0	23	20	43	25	25	25	23	25	20	0	50	0.96	1	0.86	0.98	0	92	80	0.92	0.8	92	80	0.92	0.8	0.86	[]	ordishc	1169169208_combined_results_mb.csv	1169169208	47	50	43	48	23	20	0.94	1	0.86	0.96
ordishc-connection_validation-1169397759_FBQ6c_C1_R-complete	1169397759	FC1_d	Roughly traced	170	662	48	49	44	49	0	24	20	43	25	25	25	24	25	20	1	50	0.96	0.98	0.88	0.98	0	96	80	0.96	0.8	96	80	0.96	0.8	0.86	['tbar location']	lohffa	1169397759_combined_results_cx.csv	1169397759	48	49	44	48	23	21	0.96	0.98	0.88	0.96
ordishc-connection_validation-1170348225_PAM05a(B'2p)_L-complete	1170348225	PAM05_a	Roughly traced	435	1280	50	50	48	50	0	24	24	48	25	25	25	24	25	24	0	50	1	1	0.96	1	0	96	96	0.96	0.96	96	96	0.96	0.96	0.96	[]	lohffa	1170348225_combined_results_mb_retry.csv	1170348225	50	50	45	50	23	22	1	1	0.9	1
lohffa-connection_validation-1172713521_KCy_d-complete	1172713521	KCg-d	Roughly traced	825	2544	50	50	46	50	3	22	24	46	25	25	25	22	25	24	3	50	1	1	0.92	1	0.06	88	96	0.88	0.96	88	96	0.88	0.96	0.92	['PSD not valid?', 'PSD not valid?', 'PSD not valid?']	ogundeyio	1172713521_combined_results_mb.csv	1172713521	50	50	46	50	23	23	1	1	0.92	1
rymert-connection_validation-1188509405_Delta12h_L-complete	1188509405	Delta0L	Roughly traced	65	468	49	49	43	48	0	20	23	41	25	25	25	20	25	23	2	50	0.98	0.98	0.86	0.96	0	80	92	0.8	0.92	80	92	0.8	0.92	0.82	['needs split', 'hotknife']	ogundeyio	1188509405_combined_results_cx.csv	1188509405	49	49	45	48	23	22	0.98	0.98	0.9	0.96
takemurasa-connection_validation-1199383911_FB_Q10b_C9_L-complete	1199383911	FS2B	Roughly traced	104	530	50	50	45	49	0	21	24	44	25	25	25	21	25	24	1	50	1	1	0.9	0.98	0	84	96	0.84	0.96	84	96	0.84	0.96	0.88	['Merge resulted double PSD at (31712, 24373, 18783) and (31709, 24427, 18809)']	takemurasa	1199383911_combined_results_cx.csv	1199383911	50	50	46	50	23	23	1	1	0.92	1
lohffa-connection_validation-1200070420_FB02u(SFS1)_L-complete	1200070420	FB2G_b	Roughly traced	468	774	49	47	44	49	4	23	21	40	25	25	25	23	25	21	5	50	0.98	0.94	0.88	0.98	0.08	92	84	0.92	0.84	92	84	0.92	0.84	0.8	['PSD not valid?', 'PSD not valid?', 'low confidence PSD placement', 'PSD not valid?', 'T-bar not valid?']	ogundeyio	1200070420_combined_results_cx.csv	1200070420	49	48	43	49	23	20	0.98	0.96	0.86	0.98
lohffa-connection_validation-1224591253_FB03c(igL2)_R-complete	1224591253	FB3E	Roughly traced	261	988	49	45	45	48	5	23	22	38	25	25	25	23	25	22	6	50	0.98	0.9	0.9	0.96	0.1	92	88	0.92	0.88	92	88	0.92	0.88	0.76	['PSD not valid?', 'PSD not valid?', 'PSD not valid?', 'low confidence PSD placement', 'PSD not valid?', 'PSD not valid?']	rymert	1224591253_combined_results_cx.csv	1224591253	48	46	46	49	23	23	0.96	0.92	0.92	0.98
smithc-connection_validation-1224941044_FB02a(PPM3_FB2_NO_DAN)(MEF1)_R-complete	1224941044	FB2A	Traced	1170	2596	49	50	44	49	1	22	22	43	25	25	25	22	25	22	1	50	0.98	1	0.88	0.98	0.02	88	88	0.88	0.88	88	88	0.88	0.88	0.86	['Not sure T-bar glyph is on a valid T-bar']	ordishc	1224941044_combined_results_cx.csv	1224941044	50	50	46	50	23	23	1	1	0.92	1
smithc-connection_validation-1225290633_FB04c(NO2)(aVT1)_R-complete	1225290633	FB4C	Traced	976	6792	47	48	42	49	3	22	20	42	25	25	25	22	25	20	2	50	0.94	0.96	0.84	0.98	0.06	88	80	0.88	0.8	88	80	0.88	0.8	0.84	['Not sure that the T-bar glyph is on a valid T-bar', 'Not sure if the T-bar glyph is on a valid T-bar and the segmentation of both bodies is skewed by a hotknife stitch']	lohffa	1225290633_combined_results_cx.csv	1225290633	47	48	43	49	23	20	0.94	0.96	0.86	0.98
rymert-connection_validation-1229309429_FB_Q10b_C1_R-complete	1229309429	FS2B	Roughly traced	127	1018	50	50	48	50	0	24	24	48	25	25	25	24	25	24	0	50	1	1	0.96	1	0	96	96	0.96	0.96	96	96	0.96	0.96	0.96	[]	ordishc	1229309429_combined_results_cx.csv	1229309429	50	50	47	50	23	24	1	1	0.94	1
takemurasa-connection_validation-1229654578_FB_Q10a_C1_R-complete	1229654578	FS2A	Roughly traced	95	593	49	48	39	49	0	19	20	39	25	25	25	19	25	20	1	50	0.98	0.96	0.78	0.98	0	76	80	0.76	0.8	76	80	0.76	0.8	0.78	['Tbar should be on the body 1072106313']	takemurasa	1229654578_combined_results_cx.csv	1229654578	50	50	48	50	23	25	1	1	0.96	1
rymert-connection_validation-1249443550_Delta12h_R-complete	1249443550	Delta0M	Roughly traced	35	291	50	50	43	50	0	20	23	43	25	25	25	20	25	23	1	50	1	1	0.86	1	0	80	92	0.8	0.92	80	92	0.8	0.92	0.86	['PSD placed far away']	rymert	1249443550_combined_results_cx.csv	1249443550	50	50	47	50	23	24	1	1	0.94	1
ordishc-connection_validation-1257974685_Delta0e-complete	1257974685	Delta0I	Roughly traced	141	916	50	50	44	50	0	23	21	44	25	25	25	23	25	21	0	50	1	1	0.88	1	0	92	84	0.92	0.84	92	84	0.92	0.84	0.88	[]	ordishc	1257974685_combined_results_cx.csv	1257974685	50	50	45	50	23	22	1	1	0.9	1
takemurasa-connection_validation-1261773286_R3aA(ring)(igL2)_R-complete	1261773286	R3a_a	Traced	248	752	45	50	39	49	5	22	17	39	25	25	25	22	25	17	5	50	0.9	1	0.78	0.98	0.1	88	68	0.88	0.68	88	68	0.88	0.68	0.78	['Low confidence Tbar', 'Low confidence PSD', 'Low confidence Tbar', 'Potential false merges (16320, 26091, 20234)', 'Low confidence Tbar']	ordishc	1261773286_combined_results_cx.csv	1261773286	45	50	42	50	23	19	0.9	1	0.84	1
smithc-connection_validation-1261829500_FB_Q6a_C8_R-complete	1261829500	FC1_a	Roughly traced	183	867	49	49	39	49	2	21	18	38	25	25	25	21	25	18	2	50	0.98	0.98	0.78	0.98	0.04	84	72	0.84	0.72	84	72	0.84	0.72	0.76	['Not sure the T-bar glyph is on a valid T-bar', 'Segmentation is not distinct due to a hotknife stitch']	rymert	1261829500_combined_results_cx.csv	1261829500	49	49	44	49	23	21	0.98	0.98	0.88	0.98
smithc-connection_validation-1268568859_LAL_NO3P(aVT1)_R_cont-complete	1268568859	LCNp	Traced	394	4177	45	50	38	50	4	21	17	38	25	25	25	21	25	17	5	50	0.9	1	0.76	1	0.08	84	68	0.84	0.68	84	68	0.84	0.68	0.76	['Not sure that the T-bar glyph is on a valid T-bar', 'Not sure T-bar glyph is on a valid T-bar', 'Not sure if T-bar glyph is on a valid T-bar', 'T-bar glyph is on a PSD for another synapse', 'Not sure T-bar glyph is on a valid T-bar']	takemurasa	1268568859_combined_results_cx.csv	1268568859	46	50	41	50	23	18	0.92	1	0.82	1
rymert-connection_validation-1300276335_(MEF2)_R-complete	1300276335	VeLC-L(c)	Roughly traced	951	6689	49	49	43	50	1	20	23	42	24	26	24	20	26	23	1	50	0.98	0.98	0.86	1	0.02	83.33333333	88.46153846	0.833333333	0.884615385	83.33333333	88.46153846	0.833333333	0.884615385	0.84	['Autapse']	smithc	1300276335_combined_results_mb_retry.csv	1300276335	49	49	47	50	23	24	0.98	0.98	0.94	1
smithc-connection_validation-1318028213_FB03d(aVT1)_L-complete	1318028213	FB3D	Roughly traced	148	721	49	50	47	50	1	24	23	47	25	25	25	24	25	23	1	50	0.98	1	0.94	1	0.02	96	92	0.96	0.92	96	92	0.96	0.92	0.94	['Not sure T-bar glyph is on a valid T-bar']	lohffa	1318028213_combined_results_cx.csv	1318028213	49	50	46	50	23	23	0.98	1	0.92	1
ogundeyio-connection_validation-1321430335_FB04Bd(lATL)_R-complete	1321430335	FB4Z	Roughly traced	143	1252	49	50	41	49	8	21	20	41	25	25	25	21	25	20	9	50	0.98	1	0.82	0.98	0.16	84	80	0.84	0.8	84	80	0.84	0.8	0.82	['Low Confidence psd', 'Low Confidence psd', 'Low Confidence psd', 'Low Confidence Tbar', 'Low Confidence Tbar, PSD segment needs split', 'Low Confidence psd', 'Low Confidence psd', 'Low Confidence psd', 'Low Confidence psd']	rymert	1321430335_combined_results_cx.csv	1321430335	49	50	45	50	23	22	0.98	1	0.9	1
takemurasa-connection_validation-1321745141_Delta12d_L-complete	1321745141	Delta0G_a	Roughly traced	145	965	48	50	44	50	0	23	21	44	25	25	25	23	25	21	0	50	0.96	1	0.88	1	0	92	84	0.92	0.84	92	84	0.92	0.84	0.88	[]	lohffa	1321745141_combined_results_cx.csv	1321745141	47	50	45	50	23	22	0.94	1	0.9	1
rymert-connection_validation-1322090599_Delta12d_R-complete	1322090599	Delta0G_a	Roughly traced	128	987	48	48	42	48	1	23	19	40	25	25	25	23	25	19	5	50	0.96	0.96	0.84	0.96	0.02	92	76	0.92	0.76	92	76	0.92	0.76	0.8	['hotknife', 'wrong cleft', 'unsure if Tbar or PSD', 'hotknife', 'not in cleft']	rymert	1322090599_combined_results_cx.csv	1322090599	49	48	45	49	23	22	0.98	0.96	0.9	0.98
lohffa-connection_validation-1322353714_mlPN2(A14)_R-complete	1322353714	olfactory multi vPN mlALT	Roughly traced	90	247	49	50	45	50	1	23	22	45	25	25	25	23	25	22	5	50	0.98	1	0.9	1	0.02	92	88	0.92	0.88	92	88	0.92	0.88	0.9	['low confidence PSD placement', 'low confidence PSD placement', 'low confidence PSD placement', 'PSD not valid?', 'Multiple T-bars']	ogundeyio	1322353714_combined_results_mb_retry.csv	1322353714	49	50	48	50	23	25	0.98	1	0.96	1
lohffa-connection_validation-1322466938_R1A(ring)(igL2)_R-complete	1322466938	R1_a	Traced	215	715	49	48	46	49	1	23	23	43	25	25	25	23	25	23	4	50	0.98	0.96	0.92	0.98	0.02	92	92	0.92	0.92	92	92	0.92	0.92	0.86	['PSD not valid?', 'low confidence PSD placement', 'low confidence PSD placement', 'low confidence PSD placement']	ogundeyio	1322466938_combined_results_cx.csv	1322466938	49	49	47	49	23	24	0.98	0.98	0.94	0.98
ogundeyio-connection_validation-1351511065_FB_Q6c_C8_R-complete	1351511065	FC1_d	Roughly traced	148	572	49	50	40	50	4	21	19	40	25	25	25	21	25	19	5	50	0.98	1	0.8	1	0.08	84	76	0.84	0.76	84	76	0.84	0.76	0.8	['Low Confidence psd', 'Low Confidence psd', 'Synapse needs to be moved', 'Low Conifdence psd', 'Low Confidence psd']	ogundeyio	1351511065_combined_results_cx.csv	1351511065	49	50	45	50	23	22	0.98	1	0.9	1
1375845363_put_PDL09oa	1375845363	PDL09oa_pct	Roughly traced	797	2784	50	50	44	50	1	20	24	44	25	25	22	20	24	24	1	50	1	1	0.88	1	0.02	80	96	0.8	0.96	80	96	0.909090909	1	0.88	['Low Confidence psd']		1375845363_combined_results_1000.csv	1375845363	49	50	47	50	23	24	0.98	1	0.94	1
ogundeyio-connection_validation-5812980916_(sgL2)_R-complete	5812980916	ADM11j_pct	Roughly traced	277	755	49	50	39	50	3	20	19	39	25	25	25	20	25	19	3	50	0.98	1	0.78	1	0.06	80	76	0.8	0.76	80	76	0.8	0.76	0.78	['Low Confidence psd', 'Low Confidence psd', 'Low Confidence psd']	ordishc	5812980916_combined_results_mb.csv	5812980916	49	50	41	49	23	18	0.98	1	0.82	0.98
lohffa-connection_validation-5812982656_mPNX(aCORE)_R-complete	5812982656	olfactory multi mdPN t-mALT	Roughly traced	1001	2005	49	50	44	48	1	23	21	42	25	25	25	23	25	21	1	50	0.98	1	0.88	0.96	0.02	92	84	0.92	0.84	92	84	0.92	0.84	0.84	['T-bar not valid?']	rymert	5812982656_combined_results_mb_retry.csv	5812982656	48	50	46	47	23	23	0.96	1	0.92	0.94
rymert-connection_validation-5812983383_(PLPF1)_R-complete	5812983383	PDL09d_pct	Roughly traced	648	1242	50	50	50	50	0	25	25	50	25	25	25	25	25	25	0	50	1	1	1	1	0	100	100	1	1	100	100	1	1	1	[]	lohffa	5812983383_combined_results_mb_retry.csv	5812983383	50	50	48	49	23	25	1	1	0.96	0.98
rymert-connection_validation-5812983965_put_ADM02e(aSMP)_R-complete	5812983965	CL-AtIb(c)2	Roughly traced	267	1976	50	50	44	50	1	19	25	44	25	25	25	19	25	25	1	50	1	1	0.88	1	0.02	76	100	0.76	1	76	100	0.76	1	0.88	['PSD almost in cleft']	ordishc	5812983965_combined_results_mb.csv	5812983965	49	50	48	50	23	25	0.98	1	0.96	1
ogundeyio-connection_validation-5813019513_PPL105(a'2a2)(SFS1)_R-complete	5813019513	PPL105	Roughly traced	1726	7665	50	50	42	50	1	22	20	42	25	25	25	22	25	20	1	50	1	1	0.84	1	0.02	88	80	0.88	0.8	88	80	0.88	0.8	0.84	['Low Confidence psd']	ordishc	5813019513_combined_results_mb_retry.csv	5813019513	50	50	43	50	23	20	1	1	0.86	1
rymert-connection_validation-5813019807_put_ADL09j(LBDL10)_R-complete	5813019807	ADL09j_pct	Roughly traced	344	1166	49	50	42	50	1	22	20	42	25	25	25	22	25	20	1	50	0.98	1	0.84	1	0.02	88	80	0.88	0.8	88	80	0.88	0.8	0.84	['Unsure if T-bar']	ordishc	5813019807_combined_results_mb.csv	5813019807	49	50	45	50	23	22	0.98	1	0.9	1
ogundeyio-connection_validation-5813021046_(pSIPB4)_R-complete	5813021046	Sm-C	Roughly traced	662	4241	48	50	41	50	4	21	20	41	25	25	25	21	25	20	4	50	0.96	1	0.82	1	0.08	84	80	0.84	0.8	84	80	0.84	0.8	0.82	['Low Confidence psd', 'Low Confidence psd', 'Low Confidence psd', 'Low Confidence psd']	lohffa	5813021046_combined_results_mb.csv	5813021046	48	50	45	50	23	22	0.96	1	0.9	1
smithc-connection_validation-5813021615_aMe23-complete	5813021615	aMe23	Roughly traced	362	1066	49	49	43	49	1	23	20	43	25	25	25	23	25	20	1	50	0.98	0.98	0.86	0.98	0.02	92	80	0.92	0.8	92	80	0.92	0.8	0.86	['Not sure T-bar glyph is on a valid T-bar']	ogundeyio	5813021615_combined_results_mb.csv	5813021615	48	49	45	49	23	22	0.96	0.98	0.9	0.98
lohffa-connection_validation-5813022234_MBON30(y1y2y3)(igL2)_R-complete	5813022234	MBON30	Traced	1452	13026	49	47	45	49	4	23	22	42	25	25	25	23	25	22	4	50	0.98	0.94	0.9	0.98	0.08	92	88	0.92	0.88	92	88	0.92	0.88	0.84	['T-bar is placed correctly, but segmentation is wrong, making the T-bar register with the wrong body. ', 'PSD not valid?', 'T-bar is placed corrected, but the segmentation is wrong causing the T-bar to be registered to the wrong body', 'T-bar is placed corrected, but the segmentation is wrong causing the T-bar to be registered to the wrong body']	ordishc	5813022234_combined_results_mb.csv	5813022234	49	47	45	49	23	22	0.98	0.94	0.9	0.98
ordishc-connection_validation-5813022922_Delta6i_01-complete	5813022922	Delta6H_a	Roughly traced	415	3614	49	50	46	50	0	21	25	46	25	25	25	21	25	25	0	50	0.98	1	0.92	1	0	84	100	0.84	1	84	100	0.84	1	0.92	[]	ordishc	5813022922_combined_results_cx.csv	5813022922	50	50	48	50	23	25	1	1	0.96	1
takemurasa-connection_validation-5813027592_put_PDM08a(pSM1)_R-complete	5813027592	C-Sm	Roughly traced	920	5428	50	50	48	50	3	24	24	48	25	25	25	24	25	24	3	50	1	1	0.96	1	0.06	96	96	0.96	0.96	96	96	0.96	0.96	0.96	['Low confident PSD', 'Low confident PSD', 'Low confident PSD']	ordishc	5813027592_combined_results_mb.csv	5813027592	50	50	47	50	23	24	1	1	0.94	1
rymert-connection_validation-5813033535_FB_Q7b_C9_R-complete	5813033535	FC2B	Roughly traced	199	2143	47	48	46	50	1	22	24	44	25	25	25	22	25	24	3	50	0.94	0.96	0.92	1	0.02	88	96	0.88	0.96	88	96	0.88	0.96	0.88	['hotknife', 'PSD far from cleft', 'Needs split']	smithc	5813033535_combined_results_cx.csv	5813033535	48	49	48	50	23	25	0.96	0.98	0.96	1
rymert-connection_validation-5813035213_put_ADL07f(dlLHT)_R-complete	5813035213	ADL07f_pct	Roughly traced	209	485	50	50	47	50	0	24	23	47	25	25	25	24	25	23	0	50	1	1	0.94	1	0	96	92	0.96	0.92	96	92	0.96	0.92	0.94	[]	lohffa	5813035213_combined_results_mb.csv	5813035213	50	50	45	50	23	22	1	1	0.9	1
rymert-connection_validation-5813052909_MBON29(y4y5)(PLPF3)_L-complete	5813052909	MBON29	Roughly traced	755	5270	49	49	44	50	0	21	23	43	25	25	25	21	25	23	0	50	0.98	0.98	0.88	1	0	84	92	0.84	0.92	84	92	0.84	0.92	0.86	[]	lohffa	5813052909_combined_results_mb_retry.csv	5813052909	47	50	47	50	23	24	0.94	1	0.94	1
rymert-connection_validation-5813053988_R3wA(ring)(igL2)_R-complete	5813053988	R3w_a	Traced	346	1230	47	50	43	50	1	22	21	43	25	25	25	22	25	21	1	50	0.94	1	0.86	1	0.02	88	84	0.88	0.84	88	84	0.88	0.84	0.86	['Unsure if T-bar or PSD']	rymert	5813053988_combined_results_cx.csv	5813053988	47	50	46	50	23	23	0.94	1	0.92	1
lohffa-connection_validation-5813056020_(pSM3)_R-complete	5813056020	PDM27c_pct	Roughly traced	1464	1601	47	49	47	50	2	23	24	46	25	25	25	23	25	24	4	50	0.94	0.98	0.94	1	0.04	92	96	0.92	0.96	92	96	0.92	0.96	0.92	['PSD affected by nearby T-bar?', 'low confidence PSD placement', 'T-bar and PSD not valid?', 'low confidence PSD placement']	lohffa	5813056020_combined_results_mb_retry.csv	5813056020	47	49	42	50	23	19	0.94	0.98	0.84	1
ogundeyio-connection_validation-5813056072_lPN1_VP1m(A13)_R-complete	5813056072	VP1m lPN	Roughly traced	2318	4339	49	50	40	50	4	22	18	40	25	25	25	22	25	18	4	50	0.98	1	0.8	1	0.08	88	72	0.88	0.72	88	72	0.88	0.72	0.8	['Low Confidence psd', 'Low Confidence psd', 'Low Confidence Tbar', 'Low Confidence Tbar']	rymert	5813056072_combined_results_mb_retry.csv	5813056072	49	50	44	50	23	21	0.98	1	0.88	1
rymert-connection_validation-5813058319_put_ADM05g(mAOTU2)_R-complete	5813058319	ADM05g_pct	Roughly traced	935	4094	49	50	44	49	0	23	21	43	25	25	25	23	25	21	0	50	0.98	1	0.88	0.98	0	92	84	0.92	0.84	92	84	0.92	0.84	0.86	[]	ogundeyio	5813058319_combined_results_mb_retry.csv	5813058319	50	50	46	50	23	23	1	1	0.92	1
takemurasa-connection_validation-5813058422_FB04z(SFS1)_L-complete	5813058422	FB4N	Roughly traced	780	5236	46	50	43	50	0	25	18	43	25	25	25	25	25	18	0	50	0.92	1	0.86	1	0	100	72	1	0.72	100	72	1	0.72	0.86	[]	lohffa	5813058422_combined_results_cx.csv	5813058422	46	49	42	49	23	19	0.92	0.98	0.84	0.98
lohffa-connection_validation-5813060701_FB05Bc(igL1)_R-complete	5813060701	FB5AA	Roughly traced	549	2592	49	49	43	50	3	20	23	42	25	25	25	20	25	23	3	50	0.98	0.98	0.86	1	0.06	80	92	0.8	0.92	80	92	0.8	0.92	0.84	['PSD not valid?', 'PSD not valid?', 'PSD not valid?']	rymert	5813060701_combined_results_cx.csv	5813060701	49	49	47	50	23	24	0.98	0.98	0.94	1
ordishc-connection_validation-5813068707_put_ADL12z(dAOTU1)_R-complete	5813068707	ADL12z_pct	Roughly traced	546	5137	48	50	38	50	0	19	19	38	25	25	25	19	25	19	0	50	0.96	1	0.76	1	0	76	76	0.76	0.76	76	76	0.76	0.76	0.76	[]	takemurasa	5813068707_combined_results_mb_retry.csv	5813068707	49	50	45	50	23	22	0.98	1	0.9	1
smithc-connection_validation-5813078563_FB02t(SFS1)_R-complete	5813078563	FB2H_a	Roughly traced	499	1107	48	50	41	49	2	24	17	40	26	24	26	24	24	17	4	50	0.96	1	0.82	0.98	0.04	92.30769231	70.83333333	0.923076923	0.708333333	92.30769231	70.83333333	0.923076923	0.708333333	0.8	['PSD is placed on the same body as the T-bar', 'Not sure that T-bar glyph is on a valid T-bar', 'PSD is on a falsely merged segment', 'Not sure if the T-bar glyph is on a valid T-bar']	lohffa	5813078563_combined_results_cx.csv	5813078563	49	50	45	50	23	22	0.98	1	0.9	1
takemurasa-connection_validation-5813099653_FB_Q6b_C2_R-complete	5813099653	FC1_b	Roughly traced	118	620	48	49	40	50	0	21	19	40	25	25	25	21	25	19	1	50	0.96	0.98	0.8	1	0	84	76	0.84	0.76	84	76	0.84	0.76	0.8	['Split needed at (21163, 22202, 22474)']	lohffa	5813099653_combined_results_cx.csv	5813099653	48	48	45	50	23	22	0.96	0.96	0.9	1
rymert-connection_validation-5813123748_put_ADM03g(mAOTU1)_R-complete	5813123748	ADM03j_pct	Roughly traced	618	2153	49	49	43	50	1	21	22	43	25	25	25	21	25	22	1	50	0.98	0.98	0.86	1	0.02	84	88	0.84	0.88	84	88	0.84	0.88	0.86	['PSD on edge of cleft']	ordishc	5813123748_combined_results_mb_retry.csv	5813123748	50	50	48	50	23	25	1	1	0.96	1
rymert-connection_validation-298957166_put_ADM04i(AMDF)_R-complete	298957166	C-Sm	Roughly traced	1161	4468	48	49	46	48	1	23	23	46	25	25	25	23	25	23	1	50	0.96	0.98	0.92	0.96	0.02	92	92	0.92	0.92	92	92	0.92	0.92	0.92	['PSD needs merging']	ogundeyio	298957166_combined_results_mb_retry.csv	298957166	49	50	46	49	24	22	0.98	1	0.92	0.98
rymert-connection_validation-327499164_put_ADL05b(LBDL11)_R-complete	327499164	ADL05od_pct	Roughly traced	2763	10872	50	50	48	50	1	24	24	48	25	25	25	24	25	24	1	50	1	1	0.96	1	0.02	96	96	0.96	0.96	96	96	0.96	0.96	0.96	['PSD on edge of cleft']	lohffa	327499164_combined_results_mb_retry.csv	327499164	50	50	48	50	24	24	1	1	0.96	1
327592562_put_PVL15a	327592562	PVL15a_pct	Roughly traced	311	1241	48	49	43	50	0	21	22	43	25	25	19	18	23	21	0	50	0.96	0.98	0.86	1	0	84	88	0.84	0.88	84	88	0.947368421	0.913043478	0.86	[]		327592562_combined_results_1000.csv	327592562	48	49	46	50	24	22	0.96	0.98	0.92	1
lohffa-connection_validation-357569116_FB_Q12b(AB)_C2_L-complete	357569116	FS4B	Roughly traced	43	280	50	46	46	49	2	24	22	41	25	25	25	24	25	22	2	50	1	0.92	0.92	0.98	0.04	96	88	0.96	0.88	96	88	0.96	0.88	0.82	['T-bar segmentation', 'PSD not valid?']	ogundeyio	357569116_combined_results_cx.csv	357569116	50	47	47	49	24	23	1	0.94	0.94	0.98
smithc-connection_validation-358259842_FB07h(igL1)_R.json-complete	358259842	FB8G	Roughly traced	363	1294	46	50	41	50	2	21	20	41	25	25	25	21	25	20	3	50	0.92	1	0.82	1	0.04	84	80	0.84	0.8	84	80	0.84	0.8	0.82	['Not sure T-bar glyph is on a valid T-bar', 'T-bar glyph is not on a real T-bar', 'Not sure T-bar glyph is on a valid T-bar']	smithc	358259842_combined_results_cx.csv	358259842	48	50	44	50	24	20	0.96	1	0.88	1
lohffa-connection_validation-362041442_put_ADL27c(dAOTU4)_R-complete	362041442	ADL27c_pct	Roughly traced	367	1192	50	50	47	49	3	24	23	47	25	25	25	24	25	23	5	50	1	1	0.94	0.98	0.06	96	92	0.96	0.92	96	92	0.96	0.92	0.94	['PSD not valid?', 'PSD glyph placed on T-bar body', 'low confidence PSD placement', 'T-bar not valid?', 'PSD not valid?']	ogundeyio	362041442_combined_results_mb.csv	362041442	50	50	48	50	24	24	1	1	0.96	1
rymert-connection_validation-390667603_FB01a(aVT1)_R-complete	390667603	FB1A	Roughly traced	268	922	50	50	46	49	1	23	23	45	25	25	25	23	25	23	1	50	1	1	0.92	0.98	0.02	92	92	0.92	0.92	92	92	0.92	0.92	0.9	['PSD close to cleft']	lohffa	390667603_combined_results_cx.csv	390667603	50	50	47	49	24	23	1	1	0.94	0.98
rymert-connection_validation-417221397_(pSLP1)_R-complete	417221397	PDL11e_pct	Traced	1160	1685	47	50	43	50	1	24	19	43	25	25	25	24	25	19	1	50	0.94	1	0.86	1	0.02	96	76	0.96	0.76	96	76	0.96	0.76	0.86	['Unsure if T-bar']	rymert	417221397_combined_results_mb.csv	417221397	47	50	42	50	24	18	0.94	1	0.84	1
lohffa-connection_validation-451390676_(SIPT5)_R-complete	451390676	PDM18f_pct	Roughly traced	363	2268	49	50	48	50	1	24	24	48	25	25	25	24	25	24	5	50	0.98	1	0.96	1	0.02	96	96	0.96	0.96	96	96	0.96	0.96	0.96	['low confidence PSD placement', 'low confidence PSD placement', 'low confidence PSD placement', 'low confidence PSD placement', 'PSD not valid?']	lohffa	451390676_combined_results_mb.csv	451390676	49	50	48	50	24	24	0.98	1	0.96	1
ogundeyio-connection_validation-480258208_(PLPF5)_R-complete	480258208	PVL11u_pct	Roughly traced	681	1481	50	50	38	50	0	21	17	38	25	25	25	21	25	17	0	50	1	1	0.76	1	0	84	68	0.84	0.68	84	68	0.84	0.68	0.76	[]	lohffa	480258208_combined_results_mb_retry.csv	480258208	50	50	42	50	24	18	1	1	0.84	1
lohffa-connection_validation-481636469_put_ADL16b(LBDL8)_R-complete	481636469	ADL16b_pct	Roughly traced	367	943	49	50	49	50	3	24	25	49	25	25	25	24	25	25	7	50	0.98	1	0.98	1	0.06	96	100	0.96	1	96	100	0.96	1	0.98	['PSD not affected by this T-bar, rather a nearby one', 'low confidence PSD placement', 'Multiple T-bars, PSD affected by nearby T-bar', 'PSD not valid?', 'Multiple T-bars', 'low confidence PSD placement', 'low confidence PSD placement']	ordishc	481636469_combined_results_mb_retry.csv	481636469	49	50	49	50	24	25	0.98	1	0.98	1
takemurasa-connection_validation-487523851_FB05Bd(pSM6)_R-complete	487523851	FB5B	Roughly traced	181	1219	47	50	43	50	0	24	19	43	25	25	25	24	25	19	1	50	0.94	1	0.86	1	0	96	76	0.96	0.76	96	76	0.96	0.76	0.86	['Low confidence Tbar']	takemurasa	487523851_combined_results_cx.csv	487523851	47	50	43	50	24	19	0.94	1	0.86	1
lohffa-connection_validation-488922181_put_ADM01z(SMPF)_R-complete	488922181	ADM01ok_pct	Roughly traced	2694	4516	49	50	49	50	6	25	24	49	25	25	25	25	25	24	7	50	0.98	1	0.98	1	0.12	100	96	1	0.96	100	96	1	0.96	0.98	['low confidence PSD placement', 'PSD not valid?', 'PSD not valid?', 'PSD not valid?', 'This is an extra T-bar glyph, but the connection is still valid from another T-bar glyph', 'PSD not valid?', 'T-bar and PSD not valid?']	ordishc	488922181_combined_results_mb_retry.csv	488922181	48	50	47	50	24	23	0.96	1	0.94	1
smithc-connection_validation-517514588_SIP_SMP(pSIPB1)_R-complete	517514588	PDM11y_pct	Roughly traced	467	3765	50	50	44	49	0	23	21	43	25	25	25	23	25	21	0	50	1	1	0.88	0.98	0	92	84	0.92	0.84	92	84	0.92	0.84	0.86	[]	takemurasa	517514588_combined_results_mb.csv	517514588	49	50	45	49	24	21	0.98	1	0.9	0.98
lohffa-connection_validation-517518166_MBON11(y1pedc>a_B)_L-complete	517518166	MBON11	Roughly traced	1378	1160	50	50	42	50	5	23	19	42	25	25	25	23	25	19	9	50	1	1	0.84	1	0.1	92	76	0.92	0.76	92	76	0.92	0.76	0.84	['low confidence PSD placement', 'PSD not valid?', 'PSD not valid?', 'low confidence PSD placement', 'T-bar and PSD not valid?', 'low confidence PSD placement', 'PSD not valid?', 'PSD not valid?', 'PSD not valid?']	lohffa	517518166_combined_results_mb_retry.csv	517518166	50	50	42	50	24	18	1	1	0.84	1
lohffa-connection_validation-517838849_put_ADL15c(hLHT2)_R-complete	517838849	ADL15c_pct	Traced	244	1434	50	50	50	49	1	25	25	49	25	25	25	25	25	25	3	50	1	1	1	0.98	0.02	100	100	1	1	100	100	1	1	0.98	['low confidence PSD placement', 'low confidence PSD placement', 'PSD not valid?']	ordishc	517838849_combined_results_mb.csv	517838849	49	50	48	49	24	24	0.98	1	0.96	0.98
rymert-connection_validation-518899665_SLP_CRE(pLH2)_R-complete	518899665	PDL08c_pct	Roughly traced	1255	3933	50	50	47	50	1	24	23	47	25	25	25	24	25	23	1	50	1	1	0.94	1	0.02	96	92	0.96	0.92	96	92	0.96	0.92	0.94	['Unsure if T-bar']	ordishc	518899665_combined_results_mb.csv	518899665	50	50	46	50	24	22	1	1	0.92	1
lohffa-connection_validation-539759172_FB_RUB_C6_R_small-complete	539759172	FR_b	Roughly traced	94	549	50	48	46	49	2	25	21	43	25	25	25	25	25	21	2	50	1	0.96	0.92	0.98	0.04	100	84	1	0.84	100	84	1	0.84	0.86	['T-bar not valid?', 'PSD not valid?']	lohffa	539759172_combined_results_cx.csv	539759172	50	48	46	50	24	22	1	0.96	0.92	1
lohffa-connection_validation-540657374_(pLH6)_R-complete	540657374	PDL14f_pct	Roughly traced	239	484	47	49	45	50	2	23	22	45	25	25	25	23	25	22	4	50	0.94	0.98	0.9	1	0.04	92	88	0.92	0.88	92	88	0.92	0.88	0.9	['PSD not valid?', 'PSD not valid?', 'T-bar and PSD not valid?', 'low confidence PSD placement']	ordishc	540657374_combined_results_mb.csv	540657374	47	49	47	50	24	23	0.94	0.98	0.94	1
541957126_put_PDL08oa	541957126	PDL08oa_pct	Roughly traced	127	213	50	50	48	49	2	24	24	48	25	25	20	20	23	22	5	50	1	1	0.96	0.98	0.04	96	96	0.96	0.96	96	96	1	0.956521739	0.96	['PSD not valid?', 'low confidence PSD placement', 'low confidence PSD placement', 'low confidence PSD placement', 'PSD not valid?']		541957126_combined_results_1000.csv	541957126	50	50	48	49	24	24	1	1	0.96	0.98
takemurasa-connection_validation-546852112_FB02i(SFS1)_R-complete	546852112	FB2F_b	Roughly traced	468	911	46	50	41	50	0	22	19	41	25	25	25	22	25	19	3	50	0.92	1	0.82	1	0	88	76	0.88	0.76	88	76	0.88	0.76	0.82	['Low confidence PSD', 'Low confidence PSD', 'Low confidence PSD']	ordishc	546852112_combined_results_cx.csv	546852112	47	50	44	50	24	20	0.94	1	0.88	1
lohffa-connection_validation-548571023_FB05b(pSM6)_R-complete	548571023	FB5B	Roughly traced	169	841	49	49	49	49	3	24	25	47	25	25	25	24	25	25	4	50	0.98	0.98	0.98	0.98	0.06	96	100	0.96	1	96	100	0.96	1	0.94	['low confidence PSD placement ', 'PSD not valid?', 'PSD not valid?', 'PSD not valid?']	ogundeyio	548571023_combined_results_cx.csv	548571023	50	49	48	49	24	24	1	0.98	0.96	0.98
smithc-connection_validation-548907426_FB0405a(SFS1)_R-complete	548907426	FB4X	Roughly traced	1240	4857	49	50	37	50	1	20	17	37	25	25	25	20	25	17	1	50	0.98	1	0.74	1	0.02	80	68	0.8	0.68	80	68	0.8	0.68	0.74	['Not sure what body the T-bar glyph is supposed to be on']	rymert	548907426_combined_results_cx.csv	548907426	48	50	43	50	24	19	0.96	1	0.86	1
rymert-connection_validation-574377845_put_ADL24q(LBDL4)_R-complete	574377845	ADL24t_pct	Roughly traced	1260	2331	49	48	44	48	0	24	20	42	25	25	25	24	25	20	2	50	0.98	0.96	0.88	0.96	0	96	80	0.96	0.8	96	80	0.96	0.8	0.84	['hotknife', 'hotknife']	ogundeyio	574377845_combined_results_mb_retry.csv	574377845	49	49	47	49	24	23	0.98	0.98	0.94	0.98
rymert-connection_validation-575750788_(SFS2)_R-complete	575750788	PDL22d_pct	Roughly traced	173	188	49	49	48	48	2	24	24	47	25	25	25	24	25	24	3	50	0.98	0.98	0.96	0.96	0.04	96	96	0.96	0.96	96	96	0.96	0.96	0.94	['hotknife', 'PSD on edge of cleft', 'PSD on edge of cleft']	ogundeyio	575750788_combined_results_mb.csv	575750788	50	50	49	50	24	25	1	1	0.98	1
rymert-connection_validation-610312734_put_ADM07ob(aSMPB)_R-complete	610312734	ADM07ob_pct	Roughly traced	1022	3841	49	50	42	50	0	24	18	42	25	25	25	24	25	18	0	50	0.98	1	0.84	1	0	96	72	0.96	0.72	96	72	0.96	0.72	0.84	[]	ogundeyio	610312734_combined_results_mb_retry.csv	610312734	49	50	43	50	24	19	0.98	1	0.86	1
ordishc-connection_validation-612742298_put_ADM07r(aSMPB)_L-complete	612742298	ADM07r_pct	Roughly traced	134	585	50	50	46	50	0	24	22	46	25	25	25	24	25	22	0	50	1	1	0.92	1	0	96	88	0.96	0.88	96	88	0.96	0.88	0.92	[]	lohffa	612742298_combined_results_mb_retry.csv	612742298	50	50	47	50	24	23	1	1	0.94	1
lohffa-connection_validation-613083317_put_ADM07t(aSMPB)_L-complete	613083317	ADM07t_pct	Roughly traced	176	1038	49	50	48	50	1	23	25	48	25	25	25	23	25	25	3	50	0.98	1	0.96	1	0.02	92	100	0.92	1	92	100	0.92	1	0.96	['low confidence PSD placement', 'PSD not valid?', 'low confidence PSD placement']	ogundeyio	613083317_combined_results_mb.csv	613083317	49	50	49	50	24	25	0.98	1	0.98	1
rymert-connection_validation-614081151_FB05a(aLAL1)_R-complete	614081151	FB5A	Roughly traced	1053	5465	49	50	46	49	0	23	23	45	25	25	25	23	25	23	0	50	0.98	1	0.92	0.98	0	92	92	0.92	0.92	92	92	0.92	0.92	0.9	[]	ogundeyio	614081151_combined_results_cx.csv	614081151	50	50	47	49	24	23	1	1	0.94	0.98
ordishc-connection_validation-633097828_put_ADL04a(LBDL7)_R-complete	633097828	ADL04a_pct	Roughly traced	838	1488	48	50	42	49	0	22	20	41	25	25	25	22	25	20	0	50	0.96	1	0.84	0.98	0	88	80	0.88	0.8	88	80	0.88	0.8	0.82	[]	ogundeyio	633097828_combined_results_mb_retry.csv	633097828	48	50	43	49	24	19	0.96	1	0.86	0.98
smithc-connection_validation-642715622_FB02d(aVT1)_R-complete	642715622	FB2C	Roughly traced	305	1666	50	50	46	50	0	23	23	46	25	25	25	23	25	23	0	50	1	1	0.92	1	0	92	92	0.92	0.92	92	92	0.92	0.92	0.92	[]	ordishc	642715622_combined_results_cx.csv	642715622	50	50	48	50	24	24	1	1	0.96	1
ordishc-connection_validation-667857582_(PLPF11)_R-complete	667857582	PVL04on_pct	Roughly traced	1061	2243	50	50	45	50	0	24	21	45	25	25	25	24	25	21	0	50	1	1	0.9	1	0	96	84	0.96	0.84	96	84	0.96	0.84	0.9	[]	lohffa	667857582_combined_results_mb.csv	667857582	50	50	44	50	24	20	1	1	0.88	1
rymert-connection_validation-668967527_CRE_SIP(ABDL)_R-complete	668967527	CL-Sm(c)	Roughly traced	1750	13508	49	50	45	50	0	23	22	45	25	25	25	23	25	22	0	50	0.98	1	0.9	1	0	92	88	0.92	0.88	92	88	0.92	0.88	0.9	[]	smithc	668967527_combined_results_mb_retry.csv	668967527	49	50	46	50	24	22	0.98	1	0.92	1
lohffa-connection_validation-670547617_put_ADL19r(lgL)_R-complete	670547617	ADL19r_pct	Roughly traced	604	3365	50	50	47	49	1	23	24	46	25	25	25	23	25	24	2	50	1	1	0.94	0.98	0.02	92	96	0.92	0.96	92	96	0.92	0.96	0.92	['T-bar and PSD not valid?', 'T-bar not valid?']	rymert	670547617_combined_results_mb_retry.csv	670547617	50	50	49	48	24	25	1	1	0.98	0.96
takemurasa-connection_validation-671345931_FB_Q10a_C4_L-complete	671345931	FS2A	Roughly traced	94	476	48	50	46	50	0	24	22	46	25	25	25	24	25	22	0	50	0.96	1	0.92	1	0	96	88	0.96	0.88	96	88	0.96	0.88	0.92	[]	rymert	671345931_combined_results_cx.csv	671345931	49	50	46	49	24	22	0.98	1	0.92	0.98
lohffa-connection_validation-675136878_(AMVF4)_R-complete	675136878	AVM17h_pct	Roughly traced	703	1891	49	50	47	50	2	23	24	47	25	25	25	23	25	24	4	50	0.98	1	0.94	1	0.04	92	96	0.92	0.96	92	96	0.92	0.96	0.94	['PSD not valid?', 'Multiple T-bars', 'low confidence PSD placement', 'PSD not valid?']	lohffa	675136878_combined_results_mb.csv	675136878	49	50	47	50	24	23	0.98	1	0.94	1
rymert-connection_validation-675779986_put_ADL19c(lgL)_R-complete	675779986	ADL19x_pct	Roughly traced	390	3138	50	50	47	50	0	22	25	47	25	25	25	22	25	25	0	50	1	1	0.94	1	0	88	100	0.88	1	88	100	0.88	1	0.94	[]	smithc	675779986_combined_results_mb_retry.csv	675779986	50	50	49	49	24	25	1	1	0.98	0.98
ordishc-connection_validation-694562388_FBRUB_C4_R-complete	694562388	FR_a	Roughly traced	203	2209	48	50	46	50	0	23	23	46	25	25	25	23	25	23	0	50	0.96	1	0.92	1	0	92	92	0.92	0.92	92	92	0.92	0.92	0.92	[]	takemurasa	694562388_combined_results_cx.csv	694562388	49	50	48	50	24	24	0.98	1	0.96	1
rymert-connection_validation-704777224_(pFBB2)_R-complete	704777224	PDM13oa_pct	Roughly traced	114	568	50	50	48	50	0	24	24	48	25	25	25	24	25	24	0	50	1	1	0.96	1	0	96	96	0.96	0.96	96	96	0.96	0.96	0.96	[]	ogundeyio	704777224_combined_results_mb.csv	704777224	50	50	48	50	24	24	1	1	0.96	1
lohffa-connection_validation-725942718_EB_Q5_R-complete	725942718	EL	Roughly traced	927	5071	50	50	47	50	1	24	23	47	25	25	25	24	25	23	2	50	1	1	0.94	1	0.02	96	92	0.96	0.92	96	92	0.96	0.92	0.94	['low confidence PSD placement', 'PSD not valid?']	rymert	725942718_combined_results_cx.csv	725942718	50	50	47	50	24	23	1	1	0.94	1
lohffa-connection_validation-760268555_(aSLPF3)_R-complete	760268555	PDL15k_pct	Roughly traced	484	1455	49	50	47	50	1	24	23	47	25	25	25	24	25	23	1	50	0.98	1	0.94	1	0.02	96	92	0.96	0.92	96	92	0.96	0.92	0.94	['PSD not valid?']	lohffa	760268555_combined_results_mb.csv	760268555	50	50	44	50	24	20	1	1	0.88	1
ordishc-connection_validation-766863785_FB05j(aVT1)_R-complete	766863785	FB5J	Roughly traced	211	1521	50	50	45	50	0	23	22	45	25	25	25	23	25	22	0	50	1	1	0.9	1	0	92	88	0.92	0.88	92	88	0.92	0.88	0.9	[]	takemurasa	766863785_combined_results_cx.csv	766863785	50	50	44	50	24	20	1	1	0.88	1
lohffa-connection_validation-768590452_aIPg3(PLPF11)_R_001-complete	768590452	aIPg3	Roughly traced	318	837	50	50	49	50	2	25	24	49	25	25	25	25	25	24	2	50	1	1	0.98	1	0.04	100	96	1	0.96	100	96	1	0.96	0.98	['PSD not valid?', 'PSD not valid?']	ogundeyio	768590452_combined_results_mb.csv	768590452	50	50	49	49	24	25	1	1	0.98	0.98
ordishc-connection_validation-786013791_FBRUB_C8_R_small-complete	786013791	FR_b	Roughly traced	95	616	50	50	44	49	0	21	23	43	25	25	25	21	25	23	0	50	1	1	0.88	0.98	0	84	92	0.84	0.92	84	92	0.84	0.92	0.86	[]	takemurasa	786013791_combined_results_cx.csv	786013791	50	50	48	49	24	24	1	1	0.96	0.98
790982851_put_PDL06nB	790982851	PDL06n_b_pct	Roughly traced	87	297	49	50	46	50	1	22	24	46	25	25	21	19	24	23	1	50	0.98	1	0.92	1	0.02	88	96	0.88	0.96	88	96	0.904761905	0.958333333	0.92	['Unsure if PSD makes it in cleft']		790982851_combined_results_1000.csv	790982851	50	50	47	50	24	23	1	1	0.94	1
ordishc-connection_validation-817346903_PB04_R7-complete	817346903	PFNd	Roughly traced	311	1514	48	50	45	50	0	22	23	44	25	25	25	22	25	23	0	50	0.96	1	0.9	1	0	88	92	0.88	0.92	88	92	0.88	0.92	0.88	[]	ordishc	817346903_combined_results_cx.csv	817346903	48	50	45	49	24	21	0.96	1	0.9	0.98
ogundeyio-connection_validation-817683388_PB01a_R7-complete	817683388	PFNp_a	Roughly traced	85	260	50	50	40	50	2	21	19	40	25	25	25	21	25	19	2	50	1	1	0.8	1	0.04	84	76	0.84	0.76	84	76	0.84	0.76	0.8	['Low Confidence psd', 'Low Confidence psd']	ogundeyio	817683388_combined_results_cx.csv	817683388	50	50	45	50	24	21	1	1	0.9	1
lohffa-connection_validation-827889523_put_ADM03b(mAOTU1)_R-complete	827889523	ADM03b_pct	Roughly traced	419	1962	48	50	40	50	4	23	17	40	25	25	25	23	25	17	6	50	0.96	1	0.8	1	0.08	92	68	0.92	0.68	92	68	0.92	0.68	0.8	['low confidence PSD placement', 'PSD not valid?', 'PSD not valid?', 'low confidence PSD placement', 'T-bar and PSD not valid? ', 'T-bar not valid?']	lohffa	827889523_combined_results_mb_retry.csv	827889523	49	50	44	49	24	20	0.98	1	0.88	0.98
lohffa-connection_validation-853717974_(PLPF4)_R-complete	853717974	PVL03lb_pct	Roughly traced	670	2000	50	50	49	50	0	24	25	49	25	25	25	24	25	25	0	50	1	1	0.98	1	0	96	100	0.96	1	96	100	0.96	1	0.98	[]	rymert	853717974_combined_results_mb.csv	853717974	50	50	48	50	24	24	1	1	0.96	1
lohffa-connection_validation-862787861_put_ADM07z(aSMPB)_R-complete	862787861	ADM07s_pct	Roughly traced	130	247	49	50	40	50	1	21	19	40	25	25	25	21	25	19	3	50	0.98	1	0.8	1	0.02	84	76	0.84	0.76	84	76	0.84	0.76	0.8	['PSD not valid?', 'low confidence PSD placement', 'low confidence PSD placement']	lohffa	862787861_combined_results_mb.csv	862787861	49	50	44	50	24	20	0.98	1	0.88	1
lohffa-connection_validation-882200934_PB11(PF_R)_R1-complete	882200934	PFR_a	Roughly traced	550	1797	50	47	46	50	4	22	24	43	25	25	25	22	25	24	6	50	1	0.94	0.92	1	0.08	88	96	0.88	0.96	88	96	0.88	0.96	0.86	['PSD not valid?', 'low confidence PSD placement', 'PSD not valid?', 'PSD not valid?', 'low confidence PSD placement', 'PSD not valid?']	rymert	882200934_combined_results_cx.csv	882200934	50	49	49	50	24	25	1	0.98	0.98	1
rymert-connection_validation-885599260_FB0708(lATL)_R-complete	885599260	FB7J	Roughly traced	215	2012	49	50	44	50	2	24	20	44	25	25	25	24	25	20	3	50	0.98	1	0.88	1	0.04	96	80	0.96	0.8	96	80	0.96	0.8	0.88	['Unsure if T-bar', 'Separated by glia', 'Unsure if T-bar']	ordishc	885599260_combined_results_cx.csv	885599260	50	50	47	50	24	23	1	1	0.94	1
ordishc-connection_validation-886285243_Delta0a-complete	886285243	Delta0A_a	Roughly traced	78	276	50	49	42	50	0	21	21	42	25	25	25	21	25	21	0	50	1	0.98	0.84	1	0	84	84	0.84	0.84	84	84	0.84	0.84	0.84	[]	takemurasa	886285243_combined_results_cx.csv	886285243	49	49	45	50	24	21	0.98	0.98	0.9	1
ogundeyio-connection_validation-892376440_(pSIPB1)_R-complete	892376440	PDM11t_pct	Roughly traced	237	915	50	50	39	50	1	23	16	39	25	25	25	23	25	16	2	50	1	1	0.78	1	0.02	92	64	0.92	0.64	92	64	0.92	0.64	0.78	['Low Confidence psd', 'Low Confidence psd']	smithc	892376440_combined_results_mb_retry.csv	892376440	50	50	42	50	24	18	1	1	0.84	1
lohffa-connection_validation-911332304_aMe12(lVLPT9)_R-complete	911332304	aMe12	Roughly traced	558	240	47	48	43	49	5	24	19	41	25	25	25	24	25	19	11	50	0.94	0.96	0.86	0.98	0.1	96	76	0.96	0.76	96	76	0.96	0.76	0.82	['T-bar and PSD not valid?', 'low confidence PSD placement', 'PSD not valid?', 'low confidence PSD placement', 'T-bar and PSD bodies are the same body', 'T-bar and PSD not valid?', 'T-bar and PSD placement not valid?', 'low confidence PSD placement', 'T-bar and PSD not valid? Density could be PSD on the T-bar body.', 'low confidence PSD placement', 'T-bar glif placed slightly off actual T-bar']	ogundeyio	911332304_combined_results_mb_retry.csv	911332304	49	48	47	50	24	23	0.98	0.96	0.94	1
takemurasa-connection_validation-915960293_FB06ob(igL1)_R-complete	915960293	FB6V	Roughly traced	558	2751	50	50	46	49	0	24	22	45	25	25	25	24	25	22	1	50	1	1	0.92	0.98	0	96	88	0.96	0.88	96	88	0.96	0.88	0.9	['Low confidence PSD']	rymert	915960293_combined_results_cx.csv	915960293	50	50	49	49	24	25	1	1	0.98	0.98
946645313_FB06c	946645313	FB6C_a	Roughly traced	938	1242	49	50	36	50	1	24	12	36	25	25	23	22	18	10	1	50	0.98	1	0.72	1	0.02	96	48	0.96	0.48	96	48	0.956521739	0.555555556	0.72	['Low Confidence psd']		946645313_combined_results_1000.csv	946645313	48	50	38	50	24	14	0.96	1	0.76	1
lohffa-connection_validation-947664053_FB0107(aVT1)_L-complete	947664053	FB1I	Roughly traced	404	1828	50	49	46	48	0	24	22	43	25	25	25	24	25	22	0	50	1	0.98	0.92	0.96	0	96	88	0.96	0.88	96	88	0.96	0.88	0.86	[]	rymert	947664053_combined_results_cx.csv	947664053	50	49	47	48	24	23	1	0.98	0.94	0.96
smithc-connection_validation-947685488_FB06p(lATL)_R-complete	947685488	FB6K	Roughly traced	530	1881	44	49	41	49	5	21	20	41	25	25	25	21	25	20	6	50	0.88	0.98	0.82	0.98	0.1	84	80	0.84	0.8	84	80	0.84	0.8	0.82	["T-bar glyph isn't on a valid T-bar", 'Not sure T-bar glyph is on a valid T-bar', 'Not sure T-bar glyph is on a valid T-bar', 'Not sure T-bar glyph is on a valid T-bar', 'Not sure T-bar glyph is on a valid T-bar', 'Hotknife stitch obscures synapse']	smithc	947685488_combined_results_cx.csv	947685488	47	49	45	49	24	21	0.94	0.98	0.9	0.98
ordishc-connection_validation-947685653_FBQ7d_C7_R-complete	947685653	FC2D	Roughly traced	140	1387	50	50	45	49	0	22	23	44	25	25	25	22	25	23	0	50	1	1	0.9	0.98	0	88	92	0.88	0.92	88	92	0.88	0.92	0.88	[]	rymert	947685653_combined_results_cx.csv	947685653	49	50	47	50	24	23	0.98	1	0.94	1
takemurasa-connection_validation-948346463_FB07d(SFS1)_L-complete	948346463	FB7B	Roughly traced	666	1960	48	50	40	50	2	24	16	40	25	25	25	24	25	16	2	50	0.96	1	0.8	1	0.04	96	64	0.96	0.64	96	64	0.96	0.64	0.8	['Low confidence PSD', 'Low confidence PSD']	takemurasa	948346463_combined_results_cx.csv	948346463	48	50	45	50	24	21	0.96	1	0.9	1
lohffa-connection_validation-949045811_FB08c(lATL)_R-complete	949045811	FB8B	Roughly traced	259	1166	50	45	44	48	2	24	20	39	25	25	25	24	25	20	2	50	1	0.9	0.88	0.96	0.04	96	80	0.96	0.8	96	80	0.96	0.8	0.78	['PSD not valid?', 'T-bar and PSD not valid?']	lohffa	949045811_combined_results_cx.csv	949045811	49	45	46	48	24	22	0.98	0.9	0.92	0.96
ordishc-connection_validation-953414780_FB04i(aVT1)_R-complete	953414780	FB4H	Roughly traced	875	4188	49	50	47	49	0	23	24	46	25	25	25	23	25	24	0	50	0.98	1	0.94	0.98	0	92	96	0.92	0.96	92	96	0.92	0.96	0.92	[]	lohffa	953414780_combined_results_cx.csv	953414780	50	50	48	50	24	24	1	1	0.96	1
lohffa-connection_validation-977002560_FB_Q9_C4_R-complete	977002560	FS1B	Roughly traced	106	833	50	50	49	49	1	24	25	48	25	25	25	24	25	25	1	50	1	1	0.98	0.98	0.02	96	100	0.96	1	96	100	0.96	1	0.96	['PSD not valid?']	ogundeyio	977002560_combined_results_cx.csv	977002560	49	50	49	50	24	25	0.98	1	0.98	1
rymert-connection_validation-977335118_FB_Q10b_C5_L-complete	977335118	FS2B	Roughly traced	75	446	50	48	47	50	1	24	23	45	25	25	25	24	25	23	1	50	1	0.96	0.94	1	0.02	96	92	0.96	0.92	96	92	0.96	0.92	0.9	['Not sure where cleft ends']	takemurasa	977335118_combined_results_cx.csv	977335118	50	49	48	50	24	24	1	0.98	0.96	1
ogundeyio-connection_validation-1009371416_Delta6c_13-complete	1009371416	Delta6C	Roughly traced	313	1635	50	50	43	49	5	21	22	42	25	25	25	21	25	22	5	50	1	1	0.86	0.98	0.1	84	88	0.84	0.88	84	88	0.84	0.88	0.84	['Low Confidence psd', 'Low Confidence Tbar', 'Low Confidence psd', 'Low Confidence psd', 'False merge in psd']	rymert	1009371416_combined_results_cx.csv	1009371416	48	50	47	49	24	23	0.96	1	0.94	0.98
lohffa-connection_validation-1044918145_FB_Q9_C7_R-complete	1044918145	FS1A	Roughly traced	100	1143	46	48	42	49	0	22	20	39	25	25	25	22	25	20	0	50	0.92	0.96	0.84	0.98	0	88	80	0.88	0.8	88	80	0.88	0.8	0.78	[]	ordishc	1044918145_combined_results_cx.csv	1044918145	48	48	46	49	24	22	0.96	0.96	0.92	0.98
ordishc-connection_validation-1070103072_FBQ9_C5_R-complete	1070103072	FS1B	Roughly traced	93	282	50	50	44	49	0	22	22	43	25	25	25	22	25	22	0	50	1	1	0.88	0.98	0	88	88	0.88	0.88	88	88	0.88	0.88	0.86	[]	lohffa	1070103072_combined_results_cx.csv	1070103072	50	50	46	49	24	22	1	1	0.92	0.98
ordishc-connection_validation-1073457310_FBQ12a_C2_R-complete	1073457310	FS4A	Roughly traced	57	239	49	50	47	49	0	23	24	46	25	25	25	23	25	24	0	50	0.98	1	0.94	0.98	0	92	96	0.92	0.96	92	96	0.92	0.96	0.92	[]	ordishc	1073457310_combined_results_cx.csv	1073457310	49	50	49	49	24	25	0.98	1	0.98	0.98
ogundeyio-connection_validation-1075598224_FB_Q9_C2_R-complete	1075598224	FS1B	Roughly traced	113	1127	49	50	43	50	1	23	20	43	25	25	25	23	25	20	1	50	0.98	1	0.86	1	0.02	92	80	0.92	0.8	92	80	0.92	0.8	0.86	['Low Confidence psd']	ogundeyio	1075598224_combined_results_cx.csv	1075598224	49	50	46	50	24	22	0.98	1	0.92	1
takemurasa-connection_validation-1098733189_FB_Q6c_C7_R-complete	1098733189	FC1_d	Roughly traced	180	857	50	50	39	50	0	22	17	39	25	25	25	22	25	17	1	50	1	1	0.78	1	0	88	68	0.88	0.68	88	68	0.88	0.68	0.78	['Low confidence PSD']	lohffa	1098733189_combined_results_cx.csv	1098733189	49	50	42	50	24	18	0.98	1	0.84	1
rymert-connection_validation-1100796838_Delta6k_01-complete	1100796838	Delta6I	Roughly traced	286	2234	49	49	43	50	0	20	23	43	25	25	25	20	25	23	2	50	0.98	0.98	0.86	1	0	80	92	0.8	0.92	80	92	0.8	0.92	0.86	['PSD from other cleft', 'PSD placed far away']	takemurasa	1100796838_combined_results_cx.csv	1100796838	50	50	49	50	24	25	1	1	0.98	1
lohffa-connection_validation-1105834722_R4dA(ring)(igL2)_R-complete	1105834722	R4d_a	Traced	520	1508	48	48	47	49	1	24	23	45	25	25	25	24	25	23	2	50	0.96	0.96	0.94	0.98	0.02	96	92	0.96	0.92	96	92	0.96	0.92	0.9	['low confidence PSD placement', 'PSD not valid?']	ogundeyio	1105834722_combined_results_cx.csv	1105834722	48	48	48	49	24	24	0.96	0.96	0.96	0.98
lohffa-connection_validation-1131831822_FB03a(FB3_NO_DAN)(aVT1)_R-complete	1131831822	FB3A	Roughly traced	451	2765	50	46	47	50	4	22	25	43	25	25	25	22	25	25	5	50	1	0.92	0.94	1	0.08	88	100	0.88	1	88	100	0.88	1	0.86	['PSD not valid?', 'PSD not valid?', 'low confidence PSD placement', 'PSD not valid?', 'T-bar and PSD not valid?']	lohffa	1131831822_combined_results_cx.csv	1131831822	50	47	49	50	24	25	1	0.94	0.98	1
lohffa-connection_validation-1133925083_FB_Q7b_C8_R-complete	1133925083	FC2B	Roughly traced	195	2338	50	44	47	50	1	23	24	41	25	25	25	23	25	24	1	50	1	0.88	0.94	1	0.02	92	96	0.92	0.96	92	96	0.92	0.96	0.82	['PSD not valid?']	rymert	1133925083_combined_results_cx.csv	1133925083	50	46	48	50	24	24	1	0.92	0.96	1
smithc-connection_validation-1135902770_FB_Q6c_C3_R-complete	1135902770	FC1_d	Roughly traced	169	780	50	49	46	50	0	24	22	45	25	25	25	24	25	22	0	50	1	0.98	0.92	1	0	96	88	0.96	0.88	96	88	0.96	0.88	0.9	[]	lohffa	1135902770_combined_results_cx.csv	1135902770	50	50	47	50	24	23	1	1	0.94	1
lohffa-connection_validation-1139667240_MBON13(a'2)(MBDLaxon1)_R-complete	1139667240	MBON13	Roughly traced	1277	9649	49	48	47	50	1	24	23	46	25	25	25	24	25	23	3	50	0.98	0.96	0.94	1	0.02	96	92	0.96	0.92	96	92	0.96	0.92	0.92	['low confidence PSD placement', 'PSD not valid?', 'T-bar and PSD are same body']	ogundeyio	1139667240_combined_results_mb.csv	1139667240	49	48	47	50	24	23	0.98	0.96	0.94	1
lohffa-connection_validation-1158631810_aMe5-complete	1158631810	aMe5	Roughly traced	246	192	49	49	44	49	5	23	21	43	25	25	25	23	25	21	9	50	0.98	0.98	0.88	0.98	0.1	92	84	0.92	0.84	92	84	0.92	0.84	0.86	['low confidence PSD placement', 'PSD not valid?', 'low confidence PSD placement', 'T-bar and PSD not valid?', 'T-bar placed in postion where you can not determine what segmentation it belongs to.', 'low confidence PSD placement', 'PSD not valid?', 'low confidence PSD placement', 'PSD not valid?']	lohffa	1158631810_combined_results_mb_retry.csv	1158631810	49	49	46	49	24	22	0.98	0.98	0.92	0.98
lohffa-connection_validation-1164234826_FB_Q6b_C5_R-complete	1164234826	FC1_c	Roughly traced	119	471	50	50	50	46	2	25	25	46	25	25	25	25	25	25	4	50	1	1	1	0.92	0.04	100	100	1	1	100	100	1	1	0.92	['PSD not valid?', 'low confidence PSD placement', 'PSD not valid?', 'low confidence PSD placement']	rymert	1164234826_combined_results_cx.csv	1164234826	50	50	49	47	24	25	1	1	0.98	0.94
takemurasa-connection_validation-1168283924_FB02u(SFS1)_R-complete	1168283924	FB2G_b	Roughly traced	460	1403	50	50	41	49	0	24	17	41	25	25	25	24	25	17	1	50	1	1	0.82	0.98	0	96	68	0.96	0.68	96	68	0.96	0.68	0.82	['Self synapse']	smithc	1168283924_combined_results_cx.csv	1168283924	50	50	42	50	24	18	1	1	0.84	1
lohffa-connection_validation-1198931241_R4dB(ring)(igL2)_R-complete	1198931241	R4d_b	Traced	596	2230	49	49	47	50	0	22	25	46	25	25	25	22	25	25	0	50	0.98	0.98	0.94	1	0	88	100	0.88	1	88	100	0.88	1	0.92	[]	ogundeyio	1198931241_combined_results_mb.csv	1198931241	49	49	49	50	24	25	0.98	0.98	0.98	1
ogundeyio-connection_validation-1219069439_PB09_R9-complete	1219069439	EPGt	Roughly traced	170	790	49	50	48	50	1	24	24	48	25	25	25	24	25	24	2	50	0.98	1	0.96	1	0.02	96	96	0.96	0.96	96	96	0.96	0.96	0.96	['Low Confidence psd', 'Low Confidence psd']	ogundeyio	1219069439_combined_results_cx.csv	1219069439	49	50	49	50	24	25	0.98	1	0.98	1
ogundeyio-connection_validation-1233428010_PAM01(y5)(aSMP)_R-complete	1233428010	PAM01_a	Traced	172	1078	50	50	41	50	2	23	18	41	25	25	25	23	25	18	1	50	1	1	0.82	1	0.04	92	72	0.92	0.72	92	72	0.92	0.72	0.82	['Low Confidence psd']	lohffa	1233428010_combined_results_mb_retry.csv	1233428010	50	50	44	50	24	20	1	1	0.88	1
ogundeyio-connection_validation-1233436426_PAM03(B2B'2a)(agL1)_R-complete	1233436426	PAM03	Traced	144	693	50	50	40	50	3	19	21	40	25	25	25	19	25	21	3	50	1	1	0.8	1	0.06	76	84	0.76	0.84	76	84	0.76	0.84	0.8	['Low Confidence psd', 'Low Confidence psd', 'Low Confidence psd']	rymert	1233436426_combined_results_mb_retry.csv	1233436426	50	50	48	50	24	24	1	1	0.96	1
ogundeyio-connection_validation-1249098449_Delta0h-complete	1249098449	Delta0N	Roughly traced	48	294	50	50	40	50	0	21	19	40	25	25	25	21	25	19	0	50	1	1	0.8	1	0	84	76	0.84	0.76	84	76	0.84	0.76	0.8	[]	ordishc	1249098449_combined_results_cx.csv	1249098449	50	50	46	50	24	22	1	1	0.92	1
ordishc-connection_validation-1255289329_FB02p(SFS1)_R-complete	1255289329	FB2I_a	Roughly traced	533	1471	49	50	46	50	0	22	24	46	25	25	25	22	25	24	0	50	0.98	1	0.92	1	0	88	96	0.88	0.96	88	96	0.88	0.96	0.92	[]	rymert	1255289329_combined_results_cx.csv	1255289329	50	50	48	50	24	24	1	1	0.96	1
lohffa-connection_validation-1255630284_FB02h(SFS1)_R-complete	1255630284	FB2M	Roughly traced	531	1220	49	48	43	50	3	24	19	42	25	25	25	24	25	19	4	50	0.98	0.96	0.86	1	0.06	96	76	0.96	0.76	96	76	0.96	0.76	0.84	['low confidence PSD placement', 'PSD not valid?', 'PSD not valid?', 'PSD not valid?']	rymert	1255630284_combined_results_cx.csv	1255630284	49	49	45	50	24	21	0.98	0.98	0.9	1
lohffa-connection_validation-1261129711_FB_Q10a_C9_L-complete	1261129711	FS2A	Roughly traced	85	420	49	50	47	48	1	23	24	45	25	25	25	23	25	24	3	50	0.98	1	0.94	0.96	0.02	92	96	0.92	0.96	92	96	0.92	0.96	0.9	["I don't think this T-bar affects the PSD body, but a nearby T-bar does", 'seg. covers several bodies, PSD placed right in between two neurons', 'PSD not valid?']	rymert	1261129711_combined_results_cx.csv	1261129711	49	50	48	48	24	24	0.98	1	0.96	0.96
smithc-connection_validation-1261773414_R3dC(ring)(igL2)_R-complete	1261773414	R3d_a	Traced	319	1051	47	49	43	50	2	21	22	42	25	25	25	21	25	22	4	50	0.94	0.98	0.86	1	0.04	84	88	0.84	0.88	84	88	0.84	0.88	0.84	['Possible false merge in the T-bar body', 'Not sure T-bar glyph is on a valid T-bar', 'T-bar glyph is not on a real T-bar', 'Not sure T-bar glyph is on a valid T-bar']	ordishc	1261773414_combined_results_cx.csv	1261773414	47	50	45	50	24	21	0.94	1	0.9	1
ordishc-connection_validation-1294082002_R1B(ring)(igL2)_R-complete	1294082002	R1_b	Traced	250	793	50	50	47	48	0	24	23	45	25	25	25	24	25	23	0	50	1	1	0.94	0.96	0	96	92	0.96	0.92	96	92	0.96	0.92	0.9	[]	lohffa	1294082002_combined_results_cx.csv	1294082002	50	50	47	50	24	23	1	1	0.94	1
lohffa-connection_validation-1310499077_PB02_R9-complete	1310499077	PFNm_a	Roughly traced	147	635	50	48	47	46	0	23	24	42	25	25	25	23	25	24	3	50	1	0.96	0.94	0.92	0	92	96	0.92	0.96	92	96	0.92	0.96	0.84	['PSD affect by different nearby T-bar', 'low confidence PSD placement', 'low confidence PSD placement']	ordishc	1310499077_combined_results_cx.csv	1310499077	50	48	48	47	24	24	1	0.96	0.96	0.94
takemurasa-connection_validation-1345397641_Delta0a(AB)-complete	1345397641	Delta0A_a	Roughly traced	117	511	49	50	47	50	0	23	24	47	25	25	25	23	25	24	0	50	0.98	1	0.94	1	0	92	96	0.92	0.96	92	96	0.92	0.96	0.94	[]	ordishc	1345397641_combined_results_cx.csv	1345397641	49	50	48	50	24	24	0.98	1	0.96	1
1352357010_put_PVL11c	1352357010	PVL11f_pct	Roughly traced	1111	2458	50	50	41	49	2	22	19	40	25	25	22	21	20	17	2	50	1	1	0.82	0.98	0.04	88	76	0.88	0.76	88	76	0.954545455	0.85	0.8	['Low Confidence psd', 'False merge in psd, with split to do placed']		1352357010_combined_results_1000.csv	1352357010	50	50	45	49	24	21	1	1	0.9	0.98
ordishc-connection_validation-1376291141_(iPB4)_R-complete	1376291141	PDM19y_pct	Roughly traced	91	235	49	50	41	50	0	24	17	41	25	25	25	24	25	17	0	50	0.98	1	0.82	1	0	96	68	0.96	0.68	96	68	0.96	0.68	0.82	[]	ordishc	1376291141_combined_results_mb.csv	1376291141	49	50	40	50	24	16	0.98	1	0.8	1
ogundeyio-connection_validation-1410801066_PB01d_R5.json-complete	1410801066	PFNp_a	Roughly traced	33	159	50	50	40	50	7	22	18	40	25	25	25	22	25	18	7	50	1	1	0.8	1	0.14	88	72	0.88	0.72	88	72	0.88	0.72	0.8	['Low Confidence psd', 'Low Confidence psd', 'Low Confidence psd', 'Low Confidence psd', 'Low Convidence psd', 'Low Confidence psd', 'Low Confidence psd']	lohffa	1410801066_combined_results_cx.csv	1410801066	50	50	43	50	24	19	1	1	0.86	1
lohffa-connection_validation-1419909152_put_ADM03k(mAOTU1)_R-complete	1419909152	ADM03k_pct	Roughly traced	575	2689	50	50	47	50	1	24	23	47	25	25	25	24	25	23	6	50	1	1	0.94	1	0.02	96	92	0.96	0.92	96	92	0.96	0.92	0.94	['low confidence PSD placement', 'low confidence PSD placement', 'low confidence PSD placement', 'low confidence PSD placement', 'PSD not valid?', 'low confidence PSD placement']	lohffa	1419909152_combined_results_mb.csv	1419909152	50	50	45	50	24	21	1	1	0.9	1
rymert-connection_validation-1511032500_LAL_NO2b(AMVF4)_R_ipsi-complete	1511032500	LN2	Traced	469	2043	50	49	44	50	3	24	20	44	25	25	25	24	25	20	3	50	1	0.98	0.88	1	0.06	96	80	0.96	0.8	96	80	0.96	0.8	0.88	['PSD on edge of cleft', 'Very faint T-bar', 'Unsure if T-bar']	ordishc	1511032500_combined_results_cx.csv	1511032500	49	49	47	50	24	23	0.98	0.98	0.94	1
lohffa-connection_validation-1513363614_LAL_NO3PM(aVT1)_R_ipsi-complete	1513363614	LCNpm	Roughly traced	858	6506	49	48	48	48	1	23	25	45	24	26	24	23	26	25	3	50	0.98	0.96	0.96	0.96	0.02	95.83333333	96.15384615	0.958333333	0.961538462	95.83333333	96.15384615	0.958333333	0.961538462	0.9	['PSD not valid?', 'low confidence PSD placement', 'low confidence PSD placement']	lohffa	1513363614_combined_results_cx.csv	1513363614	49	49	47	50	24	23	0.98	0.98	0.94	1
takemurasa-connection_validation-1539758131_Delta12a_L-complete	1539758131	Delta0A_b	Roughly traced	65	216	48	50	42	50	0	24	18	42	25	25	25	24	25	18	1	50	0.96	1	0.84	1	0	96	72	0.96	0.72	96	72	0.96	0.72	0.84	['PSD location is too far from Tbar. The body should have PSD, though.']	lohffa	1539758131_combined_results_cx.csv	1539758131	48	50	43	50	24	19	0.96	1	0.86	1
1570210823_put_AVL21c	1570210823	AVL21c_pct	Roughly traced	575	978	48	50	48	50	3	23	25	48	25	25	23	23	25	25	7	50	0.96	1	0.96	1	0.06	92	100	0.92	1	92	100	1	1	0.96	['low confidence PSD placement', 'PSD glyph has been removed.', 'PSD glyph has been removed.', 'PSD not valid?', 'PSD not valid?', 'PSD not valid?', 'low confidence PSD placement']		1570210823_combined_results_1000.csv	1570210823	50	50	48	50	24	24	1	1	0.96	1
lohffa-connection_validation-1570806389_FB_NO3_R-complete	1570806389	PFNp_a	Roughly traced	30	122	50	45	45	48	5	23	22	38	25	25	25	23	25	22	5	50	1	0.9	0.9	0.96	0.1	92	88	0.92	0.88	92	88	0.92	0.88	0.76	['PSD segmentation has FM', 'PSD not valid?', 'PSD not valid?', 'PSD segmentation', 'PSD not valid?']	ordishc	1570806389_combined_results_cx.csv	1570806389	50	45	47	49	24	23	1	0.9	0.94	0.98
ordishc-connection_validation-1599431888_PB01f_R3-complete	1599431888	PFNp_c	Roughly traced	139	752	50	50	47	50	0	23	24	47	25	25	25	23	25	24	0	50	1	1	0.94	1	0	92	96	0.92	0.96	92	96	0.92	0.96	0.94	[]	ordishc	1599431888_combined_results_cx.csv	1599431888	50	50	48	50	24	24	1	1	0.96	1
rymert-connection_validation-2064165421_lPNX_V(lineage)_R.json-complete	2064165421	V ilPN	Roughly traced	1312	3892	47	50	43	50	0	24	19	43	25	25	25	24	25	19	0	50	0.94	1	0.86	1	0	96	76	0.96	0.76	96	76	0.96	0.76	0.86	[]	smithc	2064165421_combined_results_mb_retry.csv	2064165421	48	50	45	50	24	21	0.96	1	0.9	1
lohffa-connection_validation-5812979168_PAM05b(B'2p)(agL1)_L-complete	5812979168	PAM05_b	Roughly traced	248	1189	50	50	46	50	0	23	23	46	25	25	25	23	25	23	2	50	1	1	0.92	1	0	92	92	0.92	0.92	92	92	0.92	0.92	0.92	['low confidence PSD placement', 'low confidence PSD placement']	ogundeyio	5812979168_combined_results_mb.csv	5812979168	50	50	47	50	24	23	1	1	0.94	1
rymert-connection_validation-5812981264_MBON17(a'3m)(SFS1)_R-complete	5812981264	MBON17	Roughly traced	352	3797	49	50	48	50	0	24	24	48	25	25	25	24	25	24	0	50	0.98	1	0.96	1	0	96	96	0.96	0.96	96	96	0.96	0.96	0.96	[]	lohffa	5812981264_combined_results_mb.csv	5812981264	49	50	49	50	24	25	0.98	1	0.98	1
lohffa-connection_validation-5813010148_FB01b(aVT1)_R-complete	5813010148	FB1F	Roughly traced	324	1026	50	45	44	50	2	23	21	39	25	25	25	23	25	21	2	50	1	0.9	0.88	1	0.04	92	84	0.92	0.84	92	84	0.92	0.84	0.78	['PSD not valid?', 'PSD not valid?']	lohffa	5813010148_combined_results_cx.csv	5813010148	50	47	47	49	24	23	1	0.94	0.94	0.98
lohffa-connection_validation-5813010828_FB07e(pSM6)_R-complete	5813010828	FB7C	Roughly traced	208	1048	48	46	45	49	3	22	23	42	25	25	25	22	25	23	4	50	0.96	0.92	0.9	0.98	0.06	88	92	0.88	0.92	88	92	0.88	0.92	0.84	['T-bar and PSD not valid?', 'low confidence PSD placement', 'PSD placement not valid?', 'PSD not valid?']	rymert	5813010828_combined_results_cx.csv	5813010828	49	47	48	49	24	24	0.98	0.94	0.96	0.98
lohffa-connection_validation-5813011660_(SIPT2)_R-complete	5813011660	aMe24	Roughly traced	1333	4941	50	50	47	50	1	24	23	47	25	25	25	24	25	23	4	50	1	1	0.94	1	0.02	96	92	0.96	0.92	96	92	0.96	0.92	0.94	['low confidence PSD placement', 'T-bar might actually be PSD?', 'low confidence PSD placement', 'low confidence PSD placement']	ordishc	5813011660_combined_results_mb.csv	5813011660	50	50	48	50	24	24	1	1	0.96	1
lohffa-connection_validation-5813014777_FB_Q10a_C2_R-complete	5813014777	FS2A	Roughly traced	97	797	49	45	45	49	3	24	21	42	25	25	25	24	25	21	3	50	0.98	0.9	0.9	0.98	0.06	96	84	0.96	0.84	96	84	0.96	0.84	0.84	['PSD not valid?', 'This is a valid T-bar but does not affect this post-synaptic neuron. Another T-bar on this body does though. ', 'PSD not valid?']	rymert	5813014777_combined_results_cx.csv	5813014777	49	45	47	49	24	23	0.98	0.9	0.94	0.98
ordishc-connection_validation-5813019607_PPL106(a3)(SFS1)_L-complete	5813019607	PPL106	Roughly traced	1564	6480	50	49	49	50	0	24	25	48	25	25	25	24	25	25	0	50	1	0.98	0.98	1	0	96	100	0.96	1	96	100	0.96	1	0.96	[]	rymert	5813019607_combined_results_mb_retry.csv	5813019607	50	49	49	50	24	25	1	0.98	0.98	1
ogundeyio-connection_validation-5813020568_R3pB(ring)(igL2)_R-complete	5813020568	R3p_b	Traced	339	875	48	48	40	50	2	23	17	40	24	26	24	23	26	17	4	50	0.96	0.96	0.8	1	0.04	95.83333333	65.38461538	0.958333333	0.653846154	95.83333333	65.38461538	0.958333333	0.653846154	0.8	['Tbar is non existent, Autapse present', 'Low Confidence psd', 'Tbar is non existent, Autapse present', 'Low Confidence psd']	ordishc	5813020568_combined_results_cx.csv	5813020568	50	50	43	50	24	19	1	1	0.86	1
lohffa-connection_validation-5813021943_(AVF6)_R-complete	5813021943	aMe20	Roughly traced	1446	2588	50	50	49	50	2	25	24	49	25	25	25	25	25	24	4	50	1	1	0.98	1	0.04	100	96	1	0.96	100	96	1	0.96	0.98	['PSD not valid?', 'low confidence PSD placement', 'T-bar and PSD not valid?', 'low confidence PSD placement']	lohffa	5813021943_combined_results_mb.csv	5813021943	48	50	47	50	24	23	0.96	1	0.94	1
lohffa-connection_validation-5813022759_(LALT2)_R-complete	5813022759	AVM13e_pct	Roughly traced	568	1444	49	50	45	48	4	24	21	44	25	25	25	24	25	21	6	50	0.98	1	0.9	0.96	0.08	96	84	0.96	0.84	96	84	0.96	0.84	0.88	['PSD not valid? Distortion in EM ', 'PSD not valid?', 'PSD not valid?', 'T-bar and PSD placed on same body', 'PSD not valid?', 'low confidence PSD placement']	ogundeyio	5813022759_combined_results_mb.csv	5813022759	48	50	46	50	24	22	0.96	1	0.92	1
smithc-connection_validation-5813047647_R2A(ring)(igL2)_R-complete	5813047647	R2_c	Traced	504	1683	47	50	45	50	3	24	21	45	25	25	25	24	25	21	3	50	0.94	1	0.9	1	0.06	96	84	0.96	0.84	96	84	0.96	0.84	0.9	['Not sure T-bar glyph is on a valid T-bar', 'Not sure T-bar glyph is on a valid T-bar', 'Not sure T-bar glyph is on a valid T-bar']	ordishc	5813047647_combined_results_cx.csv	5813047647	47	50	46	50	24	22	0.94	1	0.92	1
lohffa-connection_validation-5813049920_LH_SLP(dLH)_R-complete	5813049920	PDL07d_pct	Roughly traced	1468	1468	49	49	45	50	0	25	20	45	25	25	25	25	25	20	1	50	0.98	0.98	0.9	1	0	100	80	1	0.8	100	80	1	0.8	0.9	['low confidence PSD placement']	ogundeyio	5813049920_combined_results_mb_retry.csv	5813049920	49	49	46	49	24	22	0.98	0.98	0.92	0.98
rymert-connection_validation-5813055862_put_ADL29d(LBDL12)_R-complete	5813055862	ADL29d_pct	Roughly traced	301	1306	48	49	45	49	1	23	22	45	25	25	25	23	25	22	1	50	0.96	0.98	0.9	0.98	0.02	92	88	0.92	0.88	92	88	0.92	0.88	0.9	['Unsure where T-bar is']	ogundeyio	5813055862_combined_results_mb.csv	5813055862	48	49	47	49	24	23	0.96	0.98	0.94	0.98
ogundeyio-connection_validation-5813057963_FB03b(EB)(igL2)_R-complete	5813057963	FB3B	Roughly traced	222	838	50	50	42	50	6	21	21	42	25	25	25	21	25	21	6	50	1	1	0.84	1	0.12	84	84	0.84	0.84	84	84	0.84	0.84	0.84	['Low Confidence psd', 'Low Confidence psd', 'Low Confidence psd', 'Low Confidence Tbar ', 'Low Confidence psd', 'Low Confidence psd']	rymert	5813057963_combined_results_cx.csv	5813057963	50	50	46	50	24	22	1	1	0.92	1
rymert-connection_validation-5813058320_put_ADM01w(SMPF)_R-complete	5813058320	ADM01w_pct	Roughly traced	887	1881	50	50	47	50	1	24	23	47	25	25	25	24	25	23	1	50	1	1	0.94	1	0.02	96	92	0.96	0.92	96	92	0.96	0.92	0.94	['PSD on edge of cleft']	rymert	5813058320_combined_results_mb_retry.csv	5813058320	50	50	48	50	24	24	1	1	0.96	1
ordishc-connection_validation-5813061560_PAM08c(y4)(agL1)_L-complete	5813061560	PAM08_a	Roughly traced	166	555	49	50	40	50	0	22	18	40	25	25	25	22	25	18	0	50	0.98	1	0.8	1	0	88	72	0.88	0.72	88	72	0.88	0.72	0.8	[]	ogundeyio	5813061560_combined_results_mb_retry.csv	5813061560	49	50	46	50	24	22	0.98	1	0.92	1
takemurasa-connection_validation-5813071320_SPS_BU_AOTU(lATL)_R-complete	5813071320	PDM21a_pct	Traced	743	2406	49	50	46	50	0	22	24	46	25	25	25	22	25	24	1	50	0.98	1	0.92	1	0	88	96	0.88	0.96	88	96	0.88	0.96	0.92	['Low confident Tbar and PSD']	lohffa	5813071320_combined_results_mb_retry.csv	5813071320	50	50	49	50	24	25	1	1	0.98	1
smithc-connection_validation-5813077544_PB08(E_PG)_R1-complete	5813077544	EPG	Roughly traced	601	5176	47	50	46	49	2	23	23	45	25	25	25	23	25	23	3	50	0.94	1	0.92	0.98	0.04	92	92	0.92	0.92	92	92	0.92	0.92	0.9	['Not sure T-bar glyph is on a valid T-bar', 'Not sure T-bar glyph is on a valid T-bar', 'T-bar glyph is not on a real T-bar']	takemurasa	5813077544_combined_results_cx.csv	5813077544	48	50	48	49	24	24	0.96	1	0.96	0.98
ordishc-connection_validation-5813079193_FB04oh(igL1)_R-complete	5813079193	FB4P_b	Roughly traced	712	2052	50	50	44	50	0	24	20	44	25	25	25	24	25	20	0	50	1	1	0.88	1	0	96	80	0.96	0.8	96	80	0.96	0.8	0.88	[]	ordishc	5813079193_combined_results_cx.csv	5813079193	50	50	44	50	24	20	1	1	0.88	1
lohffa-connection_validation-5813117385_MBON27(y5d)(MEF2)_R-complete	5813117385	MBON27	Traced	667	7649	49	50	46	50	2	24	22	46	25	25	25	24	25	22	4	50	0.98	1	0.92	1	0.04	96	88	0.96	0.88	96	88	0.96	0.88	0.92	['low confidence PSD placement', 'PSD not valid?', 'low confidence PSD placement', 'PSD not valid?']	ogundeyio	5813117385_combined_results_mb_retry.csv	5813117385	50	50	47	50	24	23	1	1	0.94	1
lohffa-connection_validation-5813127091_FB09a(pSM6)_R-complete	5813127091	FB9A	Roughly traced	93	364	49	43	45	49	3	23	22	37	25	25	25	23	25	22	5	50	0.98	0.86	0.9	0.98	0.06	92	88	0.92	0.88	92	88	0.92	0.88	0.74	['low confidence PSD placement', 'PSD not valid?', 'PSD not valid?', 'low confidence PSD placement', 'PSD not valid?']	rymert	5813127091_combined_results_cx.csv	5813127091	49	44	47	49	24	23	0.98	0.88	0.94	0.98
ordishc-connection_validation-5813127522_FBNO3_L-complete	5813127522	PFNp_a	Roughly traced	38	141	50	50	44	50	0	21	23	44	25	25	25	21	25	23	0	50	1	1	0.88	1	0	84	92	0.84	0.92	84	92	0.84	0.92	0.88	[]	takemurasa	5813127522_combined_results_cx.csv	5813127522	50	50	47	50	24	23	1	1	0.94	1
rymert-connection_validation-295141618_FB09h(pSM6)_R-complete	295141618	FB9C_b	Roughly traced	80	293	48	50	47	50	1	24	23	47	25	25	25	24	25	23	1	50	0.96	1	0.94	1	0.02	96	92	0.96	0.92	96	92	0.96	0.92	0.94	['Unsure if T-bar']	smithc	295141618_combined_results_cx.csv	295141618	49	50	48	50	25	23	0.98	1	0.96	1
ordishc-connection_validation-298927224_FB08e(pSM6)_R-complete	298927224	FB7F	Roughly traced	191	745	50	50	47	50	0	24	23	47	25	25	25	24	25	23	0	50	1	1	0.94	1	0	96	92	0.96	0.92	96	92	0.96	0.92	0.94	[]	ogundeyio	298927224_combined_results_cx.csv	298927224	50	50	47	49	25	22	1	1	0.94	0.98
lohffa-connection_validation-327843160_put_ADL07p(dlLHT)_R-complete	327843160	ADL07p_pct	Roughly traced	579	1257	50	50	49	50	3	25	24	49	25	25	25	25	25	24	6	50	1	1	0.98	1	0.06	100	96	1	0.96	100	96	1	0.96	0.98	['PSD not valid?', 'low confidence PSD placement', 'Multiple T-bars', 'T-bar and PSD not valid?', 'low confidence PSD placement', 'PSD not valid?']	ordishc	327843160_combined_results_mb.csv	327843160	50	50	49	50	25	24	1	1	0.98	1
smithc-connection_validation-328213227_FB08g(pSM6)_R-complete	328213227	FB8F_a	Roughly traced	183	897	50	50	45	50	0	24	21	45	25	25	25	24	25	21	0	50	1	1	0.9	1	0	96	84	0.96	0.84	96	84	0.96	0.84	0.9	[]	takemurasa	328213227_combined_results_cx.csv	328213227	50	50	47	50	25	22	1	1	0.94	1
lohffa-connection_validation-328542218_put_ADL16h(LBDL8)_R-complete	328542218	ADL16h_pct	Roughly traced	84	267	50	49	49	50	1	25	24	48	25	25	25	25	25	24	2	50	1	0.98	0.98	1	0.02	100	96	1	0.96	100	96	1	0.96	0.96	['Multiple T-bars', 'PSD not valid?']	rymert	328542218_combined_results_mb.csv	328542218	50	49	48	50	25	23	1	0.98	0.96	1
rymert-connection_validation-359240396_(SFS3)_R-complete	359240396	PDL19b_pct	Roughly traced	176	694	49	50	47	50	0	25	22	47	25	25	25	25	25	22	0	50	0.98	1	0.94	1	0	100	88	1	0.88	100	88	1	0.88	0.94	[]	ordishc	359240396_combined_results_mb_retry.csv	359240396	50	50	47	50	25	22	1	1	0.94	1
lohffa-connection_validation-360284300_put_ADL24h(LBDL4)_R-complete	360284300	ADL24h_pct	Roughly traced	1939	1941	50	50	49	50	2	25	24	49	25	25	25	25	25	24	3	50	1	1	0.98	1	0.04	100	96	1	0.96	100	96	1	0.96	0.98	['low confidence PSD placement', 'PSD not valid?', 'PSD not valid?']	rymert	360284300_combined_results_mb_retry.csv	360284300	50	50	47	50	25	22	1	1	0.94	1
lohffa-connection_validation-360319323_FB06v(pSM6)_R-complete	360319323	FB6Q	Roughly traced	205	1179	50	49	46	50	2	24	22	45	25	25	25	24	25	22	8	50	1	0.98	0.92	1	0.04	96	88	0.96	0.88	96	88	0.96	0.88	0.9	['low confidence PSD placement', 'PSD not valid?', 'low confidence PSD placement ', 'low confidence PSD placement', 'low confidence PSD placement', 'PSD affected by different T-bar on same body', 'PSD affected by different T-bar on same body.', 'Multiple Glifs for same T-bar. ']	lohffa	360319323_combined_results_cx.csv	360319323	50	48	50	50	25	25	1	0.96	1	1
387512128_put_PDL13d	387512128	PDL13d_pct	Roughly traced	441	435	50	50	49	50	0	25	24	49	25	25	24	24	22	22	1	50	1	1	0.98	1	0	100	96	1	0.96	100	96	1	1	0.98	['low confidence PSD placement']		387512128_combined_results_1000.csv	387512128	49	49	48	50	25	23	0.98	0.98	0.96	1
smithc-connection_validation-387568523_SMP_SMP(pSIPB2)_R-complete	387568523	PDM10a_pct	Roughly traced	752	3297	50	50	45	50	0	25	20	45	25	25	25	25	25	20	0	50	1	1	0.9	1	0	100	80	1	0.8	100	80	1	0.8	0.9	[]	ordishc	387568523_combined_results_mb_retry.csv	387568523	50	50	46	50	25	21	1	1	0.92	1
lohffa-connection_validation-387870860_LH_SLP(pLH3)_R-complete	387870860	PDL10y_pct	Roughly traced	1221	1764	50	50	48	50	2	24	24	48	25	25	25	24	25	24	5	50	1	1	0.96	1	0.04	96	96	0.96	0.96	96	96	0.96	0.96	0.96	['Multiple T-bars', 'PSD not valid? PSD affected by another T-bar', 'PSD not valid?', 'Multiple T-bars', 'PSD not valid?']	ogundeyio	387870860_combined_results_mb.csv	387870860	50	50	46	50	25	21	1	1	0.92	1
lohffa-connection_validation-390352384_put_ADL12w(dAOTU1)_R-complete	390352384	ADL12w_pct	Roughly traced	611	2319	50	50	47	50	0	25	22	47	25	25	25	25	25	22	1	50	1	1	0.94	1	0	100	88	1	0.88	100	88	1	0.88	0.94	['low confidence PSD placement']	ogundeyio	390352384_combined_results_mb_retry.csv	390352384	49	50	46	49	25	21	0.98	1	0.92	0.98
rymert-connection_validation-391716661_put_ADL15i(hLHT2)_R-complete	391716661	ADL15i_b_pct	Roughly traced	154	191	50	50	46	50	0	23	23	46	25	25	25	23	25	23	0	50	1	1	0.92	1	0	92	92	0.92	0.92	92	92	0.92	0.92	0.92	[]	ordishc	391716661_combined_results_mb_retry.csv	391716661	50	50	48	50	25	23	1	1	0.96	1
420581268_put_ADL07xB	420581268	ADL07x_b_pct	Roughly traced	141	278	50	50	49	50	1	25	24	49	25	25	24	24	22	22	2	50	1	1	0.98	1	0.02	100	96	1	0.96	100	96	1	1	0.98	['low confidence PSD placement', 'PSD not valid?']		420581268_combined_results_1000.csv	420581268	50	50	48	50	25	23	1	1	0.96	1
lohffa-connection_validation-450617762_(LEA5)_R-complete	450617762	AVL12j_pct	Traced	389	913	49	50	49	50	0	25	24	49	25	25	25	25	25	24	4	50	0.98	1	0.98	1	0	100	96	1	0.96	100	96	1	0.96	0.98	['low confidence PSD placement', 'low confidence PSD placement', 'Multiple T-bars', 'low confidence PSD placement']	ordishc	450617762_combined_results_mb_retry.csv	450617762	49	50	49	50	25	24	0.98	1	0.98	1
takemurasa-connection_validation-453765256_FB02m(SFS1)_R-complete	453765256	FB2F_a	Roughly traced	277	946	48	50	46	50	0	25	21	46	25	25	25	25	25	21	0	50	0.96	1	0.92	1	0	100	84	1	0.84	100	84	1	0.84	0.92	[]	lohffa	453765256_combined_results_cx.csv	453765256	48	50	46	50	25	21	0.96	1	0.92	1
lohffa-connection_validation-478928628_put_ADL22a(LBDL3)_R-complete	478928628	ADL22a_pct	Roughly traced	390	399	41	49	34	49	5	22	12	34	25	25	25	22	25	12	5	50	0.82	0.98	0.68	0.98	0.1	88	48	0.88	0.48	88	48	0.88	0.48	0.68	['PSD not valid?', 'PSD not valid?', 'T-bar and PSD not valid?', 'T-bar not valid?', 'PSD not valid?']	lohffa	478928628_combined_results_mb.csv	478928628	42	49	37	48	25	12	0.84	0.98	0.74	0.96
481056857_put_PDM22s	481056857	PDM22s_pct	Roughly traced	130	333	50	50	46	50	1	23	23	46	25	25	21	21	21	21	2	50	1	1	0.92	1	0.02	92	92	0.92	0.92	92	92	1	1	0.92	['low confidence PSD placement', 'PSD not valid?']		481056857_combined_results_1000.csv	481056857	50	50	50	50	25	25	1	1	1	1
485723857_put_ADL04u	485723857	ADL04u_pct	Roughly traced	187	327	48	50	47	50	2	24	23	47	25	25	24	24	24	22	4	50	0.96	1	0.94	1	0.04	96	92	0.96	0.92	96	92	1	0.916666667	0.94	['PSD not valid?', 'low confidence PSD placement', 'T-bar and PSD not valid?', 'low confidence PSD placement']		485723857_combined_results_1000.csv	485723857	48	50	47	50	25	22	0.96	1	0.94	1
lohffa-connection_validation-487925063_MBON04(B'2mp_bilateral)(aSMPB)_R-complete	487925063	MBON04	Traced	1820	15604	49	50	48	50	1	25	23	48	25	25	25	25	25	23	3	50	0.98	1	0.96	1	0.02	100	92	1	0.92	100	92	1	0.92	0.96	['PSD not valid?', 'low confidence PSD placement', 'PSD affected by nearby T-bar']	ogundeyio	487925063_combined_results_mb_retry.csv	487925063	49	50	49	50	25	24	0.98	1	0.98	1
lohffa-connection_validation-514375643_put_ADL16e(LBDL8)_R-complete	514375643	ADL16e_pct	Roughly traced	314	652	49	50	47	50	2	24	23	47	25	25	25	24	25	23	4	50	0.98	1	0.94	1	0.04	96	92	0.96	0.92	96	92	0.96	0.92	0.94	['PSD not valid?', 'low confidence PSD placement', 'low confidence PSD placement', 'PSD not valid?']	ogundeyio	514375643_combined_results_mb_retry.csv	514375643	50	50	50	50	25	25	1	1	1	1
lohffa-connection_validation-548562283_put_ADL09i(LBDL10)_R-complete	548562283	ADL09x_pct	Roughly traced	190	575	49	49	44	50	1	23	21	43	25	25	25	23	25	21	3	50	0.98	0.98	0.88	1	0.02	92	84	0.92	0.84	92	84	0.92	0.84	0.86	['low confidence PSD placement', 'Multiple T-bars, PSD affected by nearby T-bar glif rather than this glif', 'low confidence PSD placement']	ogundeyio	548562283_combined_results_mb_retry.csv	548562283	49	49	47	50	25	22	0.98	0.98	0.94	1
ordishc-connection_validation-578936675_FB05g(igL1)_R-complete	578936675	FB5G	Roughly traced	459	1853	50	50	47	50	0	25	22	47	25	25	25	25	25	22	0	50	1	1	0.94	1	0	100	88	1	0.88	100	88	1	0.88	0.94	[]	ordishc	578936675_combined_results_cx.csv	578936675	50	50	48	50	25	23	1	1	0.96	1
rymert-connection_validation-600464601_FB_RUB_C7_R_small-complete	600464601	FR_b	Roughly traced	97	827	50	49	48	50	2	25	23	47	25	25	25	25	25	23	2	50	1	0.98	0.96	1	0.04	100	92	1	0.92	100	92	1	0.92	0.94	['PSD on edge of cleft', 'PSD seems to miss cleft']	rymert	600464601_combined_results_cx.csv	600464601	50	49	49	50	25	24	1	0.98	0.98	1
lohffa-connection_validation-634759240_mlPNX(A14)_R-complete	634759240	VP4 vPN	Roughly traced	721	1164	49	49	46	49	3	25	21	44	25	25	25	25	25	21	6	50	0.98	0.98	0.92	0.98	0.06	100	84	1	0.84	100	84	1	0.84	0.88	['low confidence PSD placement ', 'PSD not valid?', 'T-bar and PSD not valid?', 'low confidence PSD placement', 'low confidence PSD placement', 'low confidence PSD placement']	ordishc	634759240_combined_results_mb_retry.csv	634759240	48	49	45	49	25	20	0.96	0.98	0.9	0.98
ordishc-connection_validation-636789034_SCLAVLP(AEF1)_R-complete	636789034	AVL23c_pct	Roughly traced	274	848	49	50	47	49	0	25	22	46	25	25	25	25	25	22	0	50	0.98	1	0.94	0.98	0	100	88	1	0.88	100	88	1	0.88	0.92	[]	ogundeyio	636789034_combined_results_mb.csv	636789034	50	50	49	49	25	24	1	1	0.98	0.98
lohffa-connection_validation-640298617_FB02g(SFS1)_R-complete	640298617	FB2F_b	Roughly traced	440	1132	50	47	45	49	2	23	22	42	25	25	25	23	25	22	2	50	1	0.94	0.9	0.98	0.04	92	88	0.92	0.88	92	88	0.92	0.88	0.84	['PSD not valid?', 'PSD not valid?']	ogundeyio	640298617_combined_results_cx.csv	640298617	50	49	49	50	25	24	1	0.98	0.98	1
takemurasa-connection_validation-670651346_FB02k(SFS1)_R-complete	670651346	FB2F_a	Roughly traced	428	1259	50	50	45	50	2	25	20	45	25	25	25	25	25	20	2	50	1	1	0.9	1	0.04	100	80	1	0.8	100	80	1	0.8	0.9	['Low confidence PSD', 'Low confidence PSD']	lohffa	670651346_combined_results_cx.csv	670651346	50	50	46	50	25	21	1	1	0.92	1
rymert-connection_validation-675468771_PAM14(B'1m)(aSMP)_R-complete	675468771	PAM13	Traced	227	758	50	50	46	50	1	24	22	46	25	25	25	24	25	22	1	50	1	1	0.92	1	0.02	96	88	0.96	0.88	96	88	0.96	0.88	0.92	['Unsure if T-bar']	ogundeyio	675468771_combined_results_mb.csv	675468771	50	50	48	50	25	23	1	1	0.96	1
lohffa-connection_validation-730692294_LAL_IB(dATL)_R-complete	730692294	PDM33a_pct	Roughly traced	541	1403	50	50	50	50	2	25	25	50	25	25	25	25	25	25	3	50	1	1	1	1	0.04	100	100	1	1	100	100	1	1	1	['low confidence PSD placement', 'PSD not valid?', 'PSD not valid?']	lohffa	730692294_combined_results_mb.csv	730692294	50	50	50	50	25	25	1	1	1	1
ordishc-connection_validation-760690116_(aLAL1)_R-complete	760690116	AVM16e_pct	Roughly traced	533	931	50	50	43	50	0	24	19	43	25	25	25	24	25	19	0	50	1	1	0.86	1	0	96	76	0.96	0.76	96	76	0.96	0.76	0.86	[]	smithc	760690116_combined_results_mb_retry.csv	760690116	50	50	46	50	25	21	1	1	0.92	1
ordishc-connection_validation-786679162_PB01e_R5-complete	786679162	PFNp_a	Roughly traced	90	420	49	50	49	49	0	25	24	47	25	25	25	25	25	24	0	50	0.98	1	0.98	0.98	0	100	96	1	0.96	100	96	1	0.96	0.94	[]	ogundeyio	786679162_combined_results_cx.csv	786679162	49	50	50	49	25	25	0.98	1	1	0.98
lohffa-connection_validation-796836697_(igL2)_R-complete	796836697	AVM07e_pct	Roughly traced	235	942	49	50	48	50	1	25	23	48	25	25	25	25	25	23	5	50	0.98	1	0.96	1	0.02	100	92	1	0.92	100	92	1	0.92	0.96	['low confidence PSD placement', 'low confidence PSD placement', 'low confidence PSD placement', 'PSD not valid?', 'low confidence PSD placement']	ogundeyio	796836697_combined_results_mb_retry.csv	796836697	50	49	49	50	25	24	1	0.98	0.98	1
ordishc-connection_validation-799578347_PAM13(B'1ap)(aSMP)_R-complete	799578347	PAM13	Traced	248	958	48	50	46	50	0	24	22	46	25	25	25	24	25	22	0	50	0.96	1	0.92	1	0	96	88	0.96	0.88	96	88	0.96	0.88	0.92	[]	ordishc	799578347_combined_results_mb_retry.csv	799578347	47	50	46	50	25	21	0.94	1	0.92	1
lohffa-connection_validation-859977121_FB04oi(igL1)_R-complete	859977121	FB4Q_a	Roughly traced	619	1812	50	49	48	50	0	25	23	47	25	25	25	25	25	23	0	50	1	0.98	0.96	1	0	100	92	1	0.92	100	92	1	0.92	0.94	[]	rymert	859977121_combined_results_cx.csv	859977121	50	49	49	50	25	24	1	0.98	0.98	1
rymert-connection_validation-860305498_FB06s(aVT1)_R-complete	860305498	FB6N	Roughly traced	599	2373	50	49	49	50	2	25	24	48	25	25	25	25	25	24	2	50	1	0.98	0.98	1	0.04	100	96	1	0.96	100	96	1	0.96	0.96	['PSD on edge of cleft', 'One cleft, two T-bars']	ordishc	860305498_combined_results_cx.csv	860305498	50	49	49	50	25	24	1	0.98	0.98	1
lohffa-connection_validation-885599043_FB08a(SFS1)_R-complete	885599043	FB8H	Roughly traced	379	1296	50	46	46	49	1	23	23	43	25	25	25	23	25	23	4	50	1	0.92	0.92	0.98	0.02	92	92	0.92	0.92	92	92	0.92	0.92	0.86	['PSD not valid?', 'low confidence PSD placement', 'low confidence PSD placement', 'low confidence PSD placement']	ogundeyio	885599043_combined_results_cx.csv	885599043	50	47	50	49	25	25	1	0.94	1	0.98
ogundeyio-connection_validation-916970574_FB_Q12a_C5_R-complete	916970574	FS4A	Roughly traced	47	192	50	50	45	50	7	23	22	45	25	25	25	23	25	22	8	50	1	1	0.9	1	0.14	92	88	0.92	0.88	92	88	0.92	0.88	0.9	['Low Confidence psd', 'Low Confidence psd', 'Low Confidence psd', 'Low Confidence psd', 'Low Confidence psd', 'Low Confidence psd', 'Low confidence', 'Low Confidence psd']	ordishc	916970574_combined_results_cx.csv	916970574	50	50	48	50	25	23	1	1	0.96	1
ordishc-connection_validation-977002807_FBQ10b_C4_L-complete	977002807	FS2B	Roughly traced	114	731	50	50	45	50	0	24	21	45	25	25	25	24	25	21	2	50	1	1	0.9	1	0	96	84	0.96	0.84	96	84	0.96	0.84	0.9	['HK', 'hk']	smithc	977002807_combined_results_cx.csv	977002807	48	50	47	50	25	22	0.96	1	0.94	1
rymert-connection_validation-1002507131_PB06a(P_EN1)_R7-complete	1002507131	PEN_a(PEN1)	Roughly traced	612	1918	49	50	46	49	1	25	21	45	25	25	25	25	25	21	1	50	0.98	1	0.92	0.98	0.02	100	84	1	0.84	100	84	1	0.84	0.9	['Unsure if T-bar or PSD']	lohffa	1002507131_combined_results_cx.csv	1002507131	49	50	48	49	25	23	0.98	1	0.96	0.98
ordishc-connection_validation-1008395737_FBQ8_C6_R-complete	1008395737	FC3	Roughly traced	161	641	49	50	43	50	0	23	20	43	25	25	25	23	25	20	0	50	0.98	1	0.86	1	0	92	80	0.92	0.8	92	80	0.92	0.8	0.86	[]	lohffa	1008395737_combined_results_cx.csv	1008395737	49	50	46	50	25	21	0.98	1	0.92	1
rymert-connection_validation-1009038739_FB_Q8_C4_R-complete	1009038739	FC3	Roughly traced	172	863	50	49	43	50	0	22	21	43	25	25	25	22	25	21	1	50	1	0.98	0.86	1	0	88	84	0.88	0.84	88	84	0.88	0.84	0.86	['PSD far away']	takemurasa	1009038739_combined_results_cx.csv	1009038739	50	50	47	50	25	22	1	1	0.94	1
rymert-connection_validation-1043842362_FB06q(iPB2)_L-complete	1043842362	FB6L	Roughly traced	104	757	49	49	47	49	0	24	23	47	25	25	25	24	25	23	1	50	0.98	0.98	0.94	0.98	0	96	92	0.96	0.92	96	92	0.96	0.92	0.94	['hotknife']	ogundeyio	1043842362_combined_results_cx.csv	1043842362	49	49	47	49	25	22	0.98	0.98	0.94	0.98
ordishc-connection_validation-1070426862_FB05n(aVT1)_R-complete	1070426862	FB5M	Roughly traced	422	1835	50	50	47	49	0	25	22	47	25	25	25	25	25	22	0	50	1	1	0.94	0.98	0	100	88	1	0.88	100	88	1	0.88	0.94	[]	rymert	1070426862_combined_results_cx.csv	1070426862	50	50	44	48	25	19	1	1	0.88	0.96
lohffa-connection_validation-1072874511_FB_Q10a_C8_R-complete	1072874511	FS2A	Roughly traced	104	778	50	49	49	50	0	25	24	48	25	25	25	25	25	24	0	50	1	0.98	0.98	1	0	100	96	1	0.96	100	96	1	0.96	0.96	[]	lohffa	1072874511_combined_results_cx.csv	1072874511	50	50	49	50	25	24	1	1	0.98	1
rymert-connection_validation-1075611602_FB_Q9_C8_R-complete	1075611602	FS1A	Roughly traced	103	743	50	50	48	50	0	25	23	48	25	25	25	25	25	23	2	50	1	1	0.96	1	0	100	92	1	0.92	100	92	1	0.92	0.96	['PSD far', 'hotknife']	smithc	1075611602_combined_results_cx.csv	1075611602	50	50	48	50	25	23	1	1	0.96	1
smithc-connection_validation-1103231711_FB_Q8_C8_R-complete	1103231711	FC3	Roughly traced	169	708	46	50	42	50	4	24	18	42	25	25	25	24	25	18	4	50	0.92	1	0.84	1	0.08	96	72	0.96	0.72	96	72	0.96	0.72	0.84	['Not sure T-bar glyph is on a valid T-bar', 'Not sure T-bar glyph is on a valid T-bar', 'Not sure if the T-bar glyph is on a valid T-bar', 'Not sure T-bar glyph is on a valid T-bar']	takemurasa	1103231711_combined_results_cx.csv	1103231711	47	50	45	50	25	20	0.94	1	0.9	1
lohffa-connection_validation-1125964651_PB05_R8-complete	1125964651	PFNv	Roughly traced	347	1192	49	48	48	50	5	24	24	46	25	25	25	24	25	24	5	50	0.98	0.96	0.96	1	0.1	96	96	0.96	0.96	96	96	0.96	0.96	0.92	['PSD not valid?', 'PSD not valid?', 'PSD not valid?', 'PSD not valid?', 'PSD not valid?']	rymert	1125964651_combined_results_cx.csv	1125964651	49	49	49	50	25	24	0.98	0.98	0.98	1
lohffa-connection_validation-1132824528_FB_Q10b_C3_R-complete	1132824528	FS2B	Roughly traced	100	883	50	45	49	49	1	24	25	43	25	25	25	24	25	25	1	50	1	0.9	0.98	0.98	0.02	96	100	0.96	1	96	100	0.96	1	0.86	['PSD not valid?']	ogundeyio	1132824528_combined_results_cx.csv	1132824528	49	47	49	49	25	24	0.98	0.94	0.98	0.98
lohffa-connection_validation-1135902716_FB_Q6a_C3_R-complete	1135902716	FC1_a	Roughly traced	156	874	50	49	48	49	3	25	23	46	25	25	25	25	25	23	4	50	1	0.98	0.96	0.98	0.06	100	92	1	0.92	100	92	1	0.92	0.92	['PSD not valid?', 'PSD not valid?', 'PSD body not affected by this T-bar, rather a nearby T-bar', 'PSD not valid?']	lohffa	1135902716_combined_results_cx.csv	1135902716	49	49	48	49	25	23	0.98	0.98	0.96	0.98
ogundeyio-connection_validation-1136252169_FB_Q6b_C3_R.json-complete	1136252169	FC1_b	Roughly traced	113	890	50	50	42	50	3	25	17	42	26	24	26	25	24	17	4	50	1	1	0.84	1	0.06	96.15384615	70.83333333	0.961538462	0.708333333	96.15384615	70.83333333	0.961538462	0.708333333	0.84	['Low Confidence psd', 'Low Confidence psd', 'Low Confidence psd', 'Low Confidence psd']	ogundeyio	1136252169_combined_results_cx.csv	1136252169	50	49	45	50	25	20	1	0.98	0.9	1
lohffa-connection_validation-1141000881_PAM08b(y4)(aSMP)_R-complete	1141000881	PAM08_b	Roughly traced	319	1982	50	50	45	50	2	23	22	45	25	25	25	23	25	22	3	50	1	1	0.9	1	0.04	92	88	0.92	0.88	92	88	0.92	0.88	0.9	['PSD not valid?', 'low confidence PSD placement', 'PSD not valid?']	rymert	1141000881_combined_results_mb_retry.csv	1141000881	50	50	48	50	25	23	1	1	0.96	1
lohffa-connection_validation-1163889808_FB_Q6a_C5_R-complete	1163889808	FC1_a	Roughly traced	177	671	50	46	44	45	5	21	23	37	25	25	25	21	25	23	5	50	1	0.92	0.88	0.9	0.1	84	92	0.84	0.92	84	92	0.84	0.92	0.74	['PSD not valid?', 'PSD not valid?', 'PSD not valid?', 'PSD not valid?', 'PSD not valid?']	lohffa	1163889808_combined_results_cx.csv	1163889808	50	48	48	47	25	23	1	0.96	0.96	0.94
lohffa-connection_validation-1167235473_FB_Q11_C1_R-complete	1167235473	FS3B	Roughly traced	70	760	50	48	46	48	4	25	21	43	25	25	25	25	25	21	5	50	1	0.96	0.92	0.96	0.08	100	84	1	0.84	100	84	1	0.84	0.86	['PSD not valid?', 'PSD not valid?', 'PSD not valid?', 'Low confidence PSD placement', 'PSD not valid?']	lohffa	1167235473_combined_results_cx.csv	1167235473	50	49	49	49	25	24	1	0.98	0.98	0.98
ordishc-connection_validation-1168625046_FB02f(SFS1)_R-complete	1168625046	FB2E	Roughly traced	551	1331	49	50	43	50	0	24	19	43	25	25	25	24	25	19	0	50	0.98	1	0.86	1	0	96	76	0.96	0.76	96	76	0.96	0.76	0.86	[]	lohffa	1168625046_combined_results_cx.csv	1168625046	49	50	47	50	25	22	0.98	1	0.94	1
ordishc-connection_validation-1168923315_R3wC(ring)(igL2)_R-complete	1168923315	R3w_c	Traced	383	1238	49	50	47	49	0	25	22	46	25	25	25	25	25	22	0	50	0.98	1	0.94	0.98	0	100	88	1	0.88	100	88	1	0.88	0.92	[]	ordishc	1168923315_combined_results_cx.csv	1168923315	49	50	48	50	25	23	0.98	1	0.96	1
rymert-connection_validation-1197251489_FB_Q10b_C2_R-complete	1197251489	FS2B	Roughly traced	140	1606	50	49	49	50	0	25	24	48	25	25	25	25	25	24	0	50	1	0.98	0.98	1	0	100	96	1	0.96	100	96	1	0.96	0.96	[]	ordishc	1197251489_combined_results_cx.csv	1197251489	50	50	50	49	25	25	1	1	1	0.98
lohffa-connection_validation-1199289203_R3wB(ring)(igL2)_R-complete	1199289203	R3w_a	Traced	309	1036	50	49	49	50	1	24	25	48	25	25	25	24	25	25	2	50	1	0.98	0.98	1	0.02	96	100	0.96	1	96	100	0.96	1	0.96	['PSD not valid?', 'low confidence PSD placement']	ogundeyio	1199289203_combined_results_cx.csv	1199289203	50	49	50	50	25	25	1	0.98	1	1
ordishc-connection_validation-1224254199_FB01f(SFS1)_R-complete	1224254199	FB1E_a	Roughly traced	362	712	49	50	44	50	0	25	19	44	25	25	25	25	25	19	0	50	0.98	1	0.88	1	0	100	76	1	0.76	100	76	1	0.76	0.88	[]	ogundeyio	1224254199_combined_results_cx.csv	1224254199	49	50	48	50	25	23	0.98	1	0.96	1
lohffa-connection_validation-1230018050_FB_Q6b_C1_R-complete	1230018050	FC1_b	Roughly traced	116	530	49	44	46	48	1	24	22	39	25	25	25	24	25	22	2	50	0.98	0.88	0.92	0.96	0.02	96	88	0.96	0.88	96	88	0.96	0.88	0.78	['low confidence PSD placement', 'PSD not valid?']	lohffa	1230018050_combined_results_cx.csv	1230018050	49	45	48	48	25	23	0.98	0.9	0.96	0.96
ordishc-connection_validation-1262101350_R3aC(ring)(igL2)_R-complete	1262101350	R3a_c	Traced	258	798	49	50	46	50	0	24	22	46	25	25	25	24	25	22	0	50	0.98	1	0.92	1	0	96	88	0.96	0.88	96	88	0.96	0.88	0.92	[]	lohffa	1262101350_combined_results_cx.csv	1262101350	50	50	49	50	25	24	1	1	0.98	1
rymert-connection_validation-1321749057_Delta12e_L-complete	1321749057	Delta0G_b	Roughly traced	126	839	48	48	46	47	2	22	24	44	25	25	25	22	25	24	6	50	0.96	0.96	0.92	0.94	0.04	88	96	0.88	0.96	88	96	0.88	0.96	0.88	['Tbar glyph needs adjusting', 'outside the cleft', 'outside cleft', 'Unsure if Tbar glyph is Tbar or PSD', 'hotknife', 'hotknife']	ogundeyio	1321749057_combined_results_cx.csv	1321749057	50	49	50	48	25	25	1	0.98	1	0.96
rymert-connection_validation-1504730162_put_AVL04q(lVLPT1)_R-complete	1504730162	AVL04s_a_pct	Roughly traced	177	290	50	50	48	50	0	25	23	48	25	25	25	25	25	23	0	50	1	1	0.96	1	0	100	92	1	0.92	100	92	1	0.92	0.96	[]	takemurasa	1504730162_combined_results_mb_retry.csv	1504730162	50	50	48	50	25	23	1	1	0.96	1
1508615283_put_ADM06bF	1508615283	ADM06of_pct	Roughly traced	262	383	45	46	45	46	0	22	23	45	25	25	22	22	24	23	8	50	0.9	0.92	0.9	0.92	0	88	92	0.88	0.92	88	92	1	0.958333333	0.9	['low confidence PSD placement', 'PSD glyph has been removed.', 'PSD glyph has been removed.', 'PSD glyph has been removed.', 'low confidence PSD placement', 'PSD glyph has been removed', 'low confidence PSD placement', 'low confidence PSD placement']		1508615283_combined_results_1000.csv	1508615283	49	50	48	50	25	23	0.98	1	0.96	1
1567482594_LC15	1567482594	LC15	Roughly traced	311	619	45	45	45	50	2	24	21	45	25	25	24	24	21	21	9	50	0.9	0.9	0.9	1	0.04	96	84	0.96	0.84	96	84	1	1	0.9	['low confidence PSD placement', 'PSD glyph has been removed.', 'PSD not valid?', 'Multiple T-bar glyphs.', 'PSD glyph has been removed.', 'PSD glyph has been removed.', 'PSD not valid?', 'PSD glyph has been removed.', 'PSD glyph has been removed.']		1567482594_combined_results_1000.csv	1567482594	50	50	50	50	25	25	1	1	1	1
lohffa-connection_validation-1599436552_PB01c_R3-complete	1599436552	PFNp_c	Roughly traced	115	628	50	48	50	50	0	25	25	48	25	25	25	25	25	25	3	50	1	0.96	1	1	0	100	100	1	1	100	100	1	1	0.96	['low confidence PSD placement', 'low confidence PSD placement', 'low confidence PSD placement']	lohffa	1599436552_combined_results_cx.csv	1599436552	50	48	50	50	25	25	1	0.96	1	1
lohffa-connection_validation-1702306047_t2PN1(lineage)_R-complete	1702306047	olfactory multi ilPN t-mALT	Roughly traced	490	1340	50	50	47	49	3	24	23	46	25	25	25	24	25	23	3	50	1	1	0.94	0.98	0.06	96	92	0.96	0.92	96	92	0.96	0.92	0.92	['PSD not valid?', 'PSD not valid?', 'PSD not valid?']	ordishc	1702306047_combined_results_mb_retry.csv	1702306047	48	50	47	49	25	22	0.96	1	0.94	0.98
rymert-connection_validation-1733677514_mPN4(A13)_R-complete	1733677514	olfactory multi lvPN mALT	Roughly traced	1131	2842	49	50	48	50	0	25	23	48	25	25	25	25	25	23	0	50	0.98	1	0.96	1	0	100	92	1	0.92	100	92	1	0.92	0.96	[]	ordishc	1733677514_combined_results_mb_retry.csv	1733677514	50	50	48	50	25	23	1	1	0.96	1
lohffa-connection_validation-1883689091_(aVT1)_R-complete	1883689091	AVM08a_pct	Roughly traced	564	1585	49	50	49	49	0	25	24	48	25	25	25	25	25	24	3	50	0.98	1	0.98	0.98	0	100	96	1	0.96	100	96	1	0.96	0.96	['low confidence PSD placement', 'low confidence PSD placement', 'low confidence PSD placement']	rymert	1883689091_combined_results_mb.csv	1883689091	49	50	49	50	25	24	0.98	1	0.98	1
rymert-connection_validation-5812980270_(pSLP2)_R-complete	5812980270	PDL13y_pct	Roughly traced	205	664	48	50	42	50	1	24	18	42	25	25	25	24	25	18	1	50	0.96	1	0.84	1	0.02	96	72	0.96	0.72	96	72	0.96	0.72	0.84	['Unsure if T-bar']	smithc	5812980270_combined_results_mb.csv	5812980270	47	50	46	50	25	21	0.94	1	0.92	1
lohffa-connection_validation-5812981058_(plLHT)_R-complete	5812981058	PDL12op_pct	Roughly traced	688	1786	50	50	48	50	2	25	23	48	25	25	25	25	25	23	2	50	1	1	0.96	1	0.04	100	92	1	0.92	100	92	1	0.92	0.96	['T-bar and PSD not valid?', 'PSD not valid?']	lohffa	5812981058_combined_results_mb.csv	5812981058	50	50	48	50	25	23	1	1	0.96	1
lohffa-connection_validation-5813010770_put_ADL18e(dAOTU3)_R-complete	5813010770	ADL18e_pct	Roughly traced	233	455	49	49	47	50	3	23	24	46	25	25	25	23	25	24	4	50	0.98	0.98	0.94	1	0.06	92	96	0.92	0.96	92	96	0.92	0.96	0.92	['PSD not valid?', 'low confidence PSD placement', 'PSD not valid?', 'T-bar and PSD not valid?']	rymert	5813010770_combined_results_mb.csv	5813010770	49	49	49	50	25	24	0.98	0.98	0.98	1
smithc-connection_validation-5813015808_FB_Q6c_C5_R-complete	5813015808	FC1_d	Roughly traced	166	529	50	50	48	50	0	24	24	48	25	25	25	24	25	24	0	50	1	1	0.96	1	0	96	96	0.96	0.96	96	96	0.96	0.96	0.96	[]	smithc	5813015808_combined_results_cx.csv	5813015808	50	50	49	50	25	24	1	1	0.98	1
rymert-connection_validation-5813053866_R4m(ring)(igL2)_R-complete	5813053866	R4m	Traced	997	1856	49	50	47	50	2	24	23	47	25	25	25	24	25	23	2	50	0.98	1	0.94	1	0.04	96	92	0.96	0.92	96	92	0.96	0.92	0.94	['Glyph placed away from T-bar', 'Unsure if T-bar']	ordishc	5813053866_combined_results_cx.csv	5813053866	49	50	49	50	25	24	0.98	1	0.98	1
lohffa-connection_validation-5813063829_SLP_IB-complete	5813063829	PVM11a_pct	Roughly traced	359	859	50	50	48	50	3	24	24	48	25	25	25	24	25	24	6	50	1	1	0.96	1	0.06	96	96	0.96	0.96	96	96	0.96	0.96	0.96	['Multiple T-bars', 'low confidence PSD placement', 'PSD not valid?', 'PSD not valid?', 'Multiple T-bars', 'PSD not valid?']	ordishc	5813063829_combined_results_mb.csv	5813063829	50	50	50	50	25	25	1	1	1	1
ordishc-connection_validation-5813071231_Delta6e_01-complete	5813071231	Delta6E	Roughly traced	339	3377	50	50	44	50	0	21	23	44	25	25	25	21	25	23	0	50	1	1	0.88	1	0	84	92	0.84	0.92	84	92	0.84	0.92	0.88	[]	takemurasa	5813071231_combined_results_cx.csv	5813071231	50	50	49	50	25	24	1	1	0.98	1
rymert-connection_validation-5813123585_put_ADM03a(mAOTU1)_R-complete	5813123585	ADM03a_pct	Roughly traced	329	905	48	50	44	50	2	24	20	44	25	25	25	24	25	20	2	50	0.96	1	0.88	1	0.04	96	80	0.96	0.8	96	80	0.96	0.8	0.88	['PSD seems on edge of cleft', 'Unsure if T-bar']	ogundeyio	5813123585_combined_results_mb_retry.csv	5813123585	48	50	46	50	25	21	0.96	1	0.92	1
lohffa-connection_validation-233105330_PDM30k_pct	233105330	PDM30k_pct	Roughly traced	185	428	50	49	50	50	4	25	25	49	25	25	25	25	25	25	4	50	1	0.98	1	1	0.08			1	1	100	100	1	1	0.98	['T-bar and PSD not valid?', 'PSD not valid?', 'T-bar and PSD not valid?', 'PSD not valid?']	lohffa
smithc-connection_validation-262517074_ON	262517074	ON	Roughly traced	1402	468	44	50	34	50	6	20	14	34	25	25	25	20	25	14	6	50	0.88	1	0.68	1	0.12			0.8	0.56	80	56	0.8	0.56	0.68	['Not sure T-bar glyph is on a valid T-bar', 'T-bar glyph and PSD glyph are on the same body', 'Not sure T-bar glyph is on a valid T-bar', 'Not sure T-bar glyph is on a valid T-bar', 'Not sure T-bar glyph is on a valid T-bar', 'Not sure T-bar glyph is on a valid T-bar']	smithc
ogundeyio-connection_validation-263475451_PDM24s_pct	263475451	PDM24s_pct	Roughly traced	399	1059	49	50	35	50	3	19	16	35	25	25	25	19	25	16	3	50	0.98	1	0.7	1	0.06			0.76	0.64	76	64	0.76	0.64	0.7	['Low Confidence PSD', 'False merge in small PSD to an RT body', 'Low Confidence PSD']	ogundeyio
ogundeyio-connection_validation-263674097_PDL06oq_pct	263674097	PDL06oq_pct	Roughly traced	133	541	50	50	39	50	2	20	19	39	25	25	25	20	25	19	2	50	1	1	0.78	1	0.04			0.8	0.76	80	76	0.8	0.76	0.78	['Low Confidence PSD', 'Low Confidence PSD']	ogundeyio
rymert-connection_validation-267214250_pC1b	267214250	pC1b	Traced	816	3158	47	50	40	50	1	20	20	40	25	25	25	20	25	20	1	50	0.94	1	0.8	1	0.02			0.8	0.8	80	80	0.8	0.8	0.8	['PSD barely touches cleft']	rymert
lohffa-connection_validation-294428266_PDL20ola_pct	294428266	PDL20ola_pct	Roughly traced	412	717	50	50	49	50	6	25	24	49	25	25	25	25	25	24	9	50	1	1	0.98	1	0.12			1	0.96	100	96	1	0.96	0.98	['PSD not valid?', 'PSD not valid?', 'low confidence PSD placement', 'PSD not valid?', 'low confidence PSD placement', 'T-bar and PSD not valid?', 'low confidence PSD placement', 'PSD not valid?', 'PSD not valid?']	lohffa
smithc-connection_validation-294436967_PVL17k_pct	294436967	PVL17k_pct	Traced	2297	3710	48	50	41	49	2	19	22	40	25	25	25	19	25	22	2	50	0.96	1	0.82	0.98	0.04			0.76	0.88	76	88	0.76	0.88	0.8	['Not sure T-bar glyph is on a valid T-bar', 'Not sure T-bar glyph is on a valid T-bar']	smithc
lohffa-connection_validation-294756576_PDL10g_f_pct	294756576	PDL10g_f_pct	Roughly traced	137	149	49	50	47	50	1	25	22	47	25	25	25	25	25	22	3	50	0.98	1	0.94	1	0.02			1	0.88	100	88	1	0.88	0.94	['low confidence PSD placement', 'Multiple T-bars. PSD affected by nearby T-bar.', 'low confidence PSD placement']	lohffa
takemurasa-connection_validation-294760699_PDL25h_pct	294760699	PDL25h_pct	Roughly traced	627	786	47	50	44	50	0	23	21	44	25	25	25	23	25	21	0	50	0.94	1	0.88	1	0			0.92	0.84	92	84	0.92	0.84	0.88	[]	takemurasa
ogundeyio-connection_validation-294760723_ADL05j_pct	294760723	ADL05j_pct	Roughly traced	171	291	48	50	39	50	2	20	19	39	25	25	25	20	25	19	1	50	0.96	1	0.78	1	0.04			0.8	0.76	80	76	0.8	0.76	0.78	['Low Confidence psd']	ogundeyio
rymert-connection_validation-294778999_PDL17x_pct	294778999	PDL17x_pct	Roughly traced	94	228	45	50	38	50	2	18	20	38	25	25	25	18	25	20	2	50	0.9	1	0.76	1	0.04			0.72	0.8	72	80	0.72	0.8	0.76	['Unsure if PSD in cleft', 'HK']	rymert
ordishc-connection_validation-295111672_PDL10oy_pct	295111672	PDL10h_pct	Roughly traced	103	169	48	50	39	50	0	22	17	39	25	25	25	22	25	17	0	50	0.96	1	0.78	1	0			0.88	0.68	88	68	0.88	0.68	0.78	[]	ordishc
takemurasa-connection_validation-295116205_SA1_a	295116205	SA1_a	Roughly traced	107	638	46	49	44	48	1	22	22	43	25	25	25	22	25	22	1	50	0.92	0.98	0.88	0.96	0.02			0.88	0.88	88	88	0.88	0.88	0.86	['Split todo placed']	takemurasa
takemurasa-connection_validation-295137392_PDM18j_pct	295137392	PDM18ob_pct	Roughly traced	56	248	50	50	49	50	1	25	24	49	25	25	25	25	25	24	1	50	1	1	0.98	1	0.02			1	0.96	100	96	1	0.96	0.98	['Low confident Tbar']	takemurasa
lohffa-connection_validation-295443136_put_ADL05k	295443136	ADL05k_pct	Roughly traced	505	764	50	50	50	50	2	25	25	50	25	25	25	25	25	25	3	50	1	1	1	1	0.04			1	1	100	100	1	1	1	['PSD not valid?', 'low confidence PSD placement', 'PSD affected by nearby T-bar. Multiple T-bars. ']	lohffa
takemurasa-connection_validation-295466276_ADL07oi_pct	295466276	ADL07oi_pct	Roughly traced	78	117	49	50	44	49	0	22	22	44	25	25	25	22	25	22	1	50	0.98	1	0.88	0.98	0			0.88	0.88	88	88	0.88	0.88	0.88	['Split todo placed']	takemurasa
rymert-connection_validation-295793991_PDM12a_pct	295793991	PDM12op_pct	Roughly traced	172	383	45	50	31	50	1	17	14	31	25	25	25	17	25	14	1	50	0.9	1	0.62	1	0.02			0.68	0.56	68	56	0.68	0.56	0.62	['Synapse on HK']	rymert
smithc-connection_validation-295816140_PDL10n_pct	295816140	PDL10n_pct	Roughly traced	875	1355	49	50	36	48	1	19	17	34	25	25	25	19	25	17	1	50	0.98	1	0.72	0.96	0.02			0.76	0.68	76	68	0.76	0.68	0.68	['Not sure T-bar glyph is on a valid T-bar, hotknife stitch obscures area']	smithc
smithc-connection_validation-296143923_ADL09r_pct	296143923	ADL09r_pct	Roughly traced	56	259	48	50	41	49	1	20	21	41	25	25	25	20	25	21	3	50	0.96	1	0.82	0.98	0.02			0.8	0.84	80	84	0.8	0.84	0.82	['T-bar glyph is not on a valid T-bar', 'Not sure T-bar glyph is on a valid T-bar', 'The physical location of the PSD is correct, the segment it is on is falsely merged to the target body']	smithc
ogundeyio-connection_validation-296168382_PDL17v_pct	296168382	PDL17v_pct	Roughly traced	121	379	48	50	30	48	3	13	17	29	25	25	25	13	25	17	3	50	0.96	1	0.6	0.96	0.06			0.52	0.68	52	68	0.52	0.68	0.58	["PSD is falsely merged to RT body that's not connected to the Tbar", 'Very Low Confidence Tbar', 'False merge in PSD. Split to do placed']	ogundeyio
ogundeyio-connection_validation-296199026_PDM07om_pct	296199026	PDM07om_pct	Roughly traced	135	761	50	50	38	50	0	17	21	38	25	25	25	17	25	21	0	50	1	1	0.76	1	0			0.68	0.84	68	84	0.68	0.84	0.76	[]	ogundeyio
rymert-connection_validation-296203434_PDM07y_pct	296203434	PDM07ow_pct	Roughly traced	184	482	50	50	41	49	0	20	21	40	25	25	25	20	25	21	1	50	1	1	0.82	0.98	0			0.8	0.84	80	84	0.8	0.84	0.8	['PSD glyph placed very far away']	rymert
lohffa-connection_validation-296514350_FB1B	296514350	FB1B	Roughly traced	299	1330	50	50	47	50	1	23	24	47	25	25	25	23	25	24	1	50	1	1	0.94	1	0.02			0.92	0.96	92	96	0.92	0.96	0.94	['T-bar and PSD not valid?']	lohffa
rymert-connection_validation-296846768_PDL14k_pct.json	296846768	PDL14k_pct	Roughly traced	164	283	49	50	43	50	2	21	22	43	25	25	25	21	25	22	2	50	0.98	1	0.86	1	0.04			0.84	0.88	84	88	0.84	0.88	0.86	['Unsure if T-bar', 'Unsure if T-bar']	rymert
lohffa-connection_validation-297183251_FB07k	297183251	FB7A	Roughly traced	911	1321	49	50	46	50	3	24	22	46	25	25	25	24	25	22	7	50	0.98	1	0.92	1	0.06			0.96	0.88	96	88	0.96	0.88	0.92	['PSD not valid?', 'PSD not valid?', 'T-bar and PSD not valid?', 'low confidence PSD placement', 'low confidence PSD placement', 'low confidence PSD placement', 'low confidence PSD placement']	lohffa
smithc-connection_validation-297558862_ADL20f_pct	297558862	ADL20f_pct	Roughly traced	100	419	47	49	36	49	3	15	21	36	25	25	25	15	25	21	3	50	0.94	0.98	0.72	0.98	0.06			0.6	0.84	60	84	0.6	0.84	0.72	['Not sure T-bar glyph is on a valid T-bar', "There's a ripple in the grayscale that obscures synapse details", "T-bar glyph doesn't seem to be on a valid T-bar, ripple in the grayscale here"]	smithc
rymert-connection_validation-297563139_PDM22d_pct	297563139	PDM22x_pct	Roughly traced	395	856	50	50	46	50	0	24	22	46	25	25	25	24	25	22	0	50	1	1	0.92	1	0			0.96	0.88	96	88	0.96	0.88	0.92	[]	rymert
takemurasa-connection_validation-297580589_PDM29h_pct	297580589	PDM29h_pct	Roughly traced	1383	5573	46	50	43	50	0	20	23	43	25	25	25	20	25	23	1	50	0.92	1	0.86	1	0			0.8	0.92	80	92	0.8	0.92	0.86	['Tbar should be placed on 452685249, not 297580589']	takemurasa
ogundeyio-connection_validation-297593055_PDM15r_pct	297593055	PDM15r_pct	Roughly traced	115	249	47	50	37	50	0	21	16	37	25	25	25	21	25	16	0	50	0.94	1	0.74	1	0			0.84	0.64	84	64	0.84	0.64	0.74	[]	ogundeyio
lohffa-connection_validation-297921570_PDM07c_pct	297921570	PDM07c_pct	Roughly traced	344	1526	49	50	46	50	1	25	21	46	25	25	25	25	25	21	3	50	0.98	1	0.92	1	0.02			1	0.84	100	84	1	0.84	0.92	['Multiple T-bars. ', 'low confidence PSD placement', 'PSD not valid?']	lohffa
takemurasa-connection_validation-298254474_PDM09v_a_pct	298254474	PDM09v_pct	Roughly traced	224	1358	48	50	39	50	1	16	23	39	25	25	25	16	25	23	1	50	0.96	1	0.78	1	0.02			0.64	0.92	64	92	0.64	0.92	0.78	['Low confident PSD']	takemurasa
lohffa-connection_validation-298262663_PDM30a_pct	298262663	PDM30a_pct	Roughly traced	721	3167	49	50	46	50	1	25	21	46	25	25	25	25	25	21	2	50	0.98	1	0.92	1	0.02			1	0.84	100	84	1	0.84	0.92	['PSD not valid?', 'low confidence PSD placement']	lohffa
smithc-connection_validation-298547259_ADL02oh_pct	298547259	ADL02oh_pct	Roughly traced	180	986	46	50	36	50	2	16	20	36	25	25	25	16	25	20	4	50	0.92	1	0.72	1	0.04			0.64	0.8	64	80	0.64	0.8	0.72	['Not sure T-bar glyph is on a valid T-bar', 'T-bar glyph is not on a valid T-bar', 'T-bar glyph is not on a valid T-bar', 'Not sure T-bar glyph is on a valid T-bar']	smithc
ordishc-connection_validation-298603963_ADL02oj_pct	298603963	ADL02oj_pct	Roughly traced	155	1286	46	50	39	50	0	18	21	39	25	25	25	18	25	21	0	50	0.92	1	0.78	1	0			0.72	0.84	72	84	0.72	0.84	0.78	[]	ordishc
rymert-connection_validation-298931773_PDM08n_pct	298931773	PDM08n_pct	Roughly traced	723	1362	49	50	45	49	3	24	21	44	25	25	25	24	25	21	3	50	0.98	1	0.9	0.98	0.06			0.96	0.84	96	84	0.96	0.84	0.88	['Unsure if synapse', 'Unsure if PSD in cleft', 'Unsure if PSD makes it in cleft']	rymert
ogundeyio-connection_validation-298944479_PDM09oa_pct	298944479	PDM09oa_pct	Roughly traced	236	960	50	50	38	49	3	14	24	37	25	25	25	14	25	24	3	50	1	1	0.76	0.98	0.06			0.56	0.96	56	96	0.56	0.96	0.74	['False merge of several bodies in the PSD', 'Low Confidence Tbar', 'Low Confidence PSD']	ogundeyio
lohffa-connection_validation-299267723_PDM20e_b_pct	299267723	PDM20i_pct	Roughly traced	315	1248	47	50	44	50	0	22	22	44	25	25	25	22	25	22	0	50	0.94	1	0.88	1	0			0.88	0.88	88	88	0.88	0.88	0.88	[]	lohffa
lohffa-connection_validation-299272806_ADL09b_a_pct	299272806	ADL09b_a_pct	Roughly traced	99	362	48	50	48	50	1	23	25	48	25	25	25	23	25	25	4	50	0.96	1	0.96	1	0.02			0.92	1	92	100	0.92	1	0.96	['T-bar actually PSD?', 'low confidence PSD placement', 'low confidence PSD placement', 'low confidence PSD placement']	lohffa
ogundeyio-connection_validation-299290105_PDM05n_pct	299290105	PDM05n_pct	Roughly traced	1061	3805	48	50	36	50	1	16	20	36	25	25	25	16	25	20	1	50	0.96	1	0.72	1	0.02			0.64	0.8	64	80	0.64	0.8	0.72	['Low Confidence PSD']	ogundeyio
rymert-connection_validation-299609112_PDM20b_pct	299609112	PDM20b_pct	Roughly traced	141	718	50	50	43	49	1	23	20	42	25	25	25	23	25	20	0	50	1	1	0.86	0.98	0.02			0.92	0.8	92	80	0.92	0.8	0.84	[]	rymert
rymert-connection_validation-325113795_PDM31a_pct	325113795	PDM31a_pct	Roughly traced	257	429	47	49	41	50	2	22	19	41	25	25	25	22	25	19	2	50	0.94	0.98	0.82	1	0.04			0.88	0.76	88	76	0.88	0.76	0.82	['Unsure if T-bar', 'HK']	rymert
rymert-connection_validation-326128466_PDL17w_pct	326128466	PDL17w_pct	Roughly traced	59	248	46	49	41	50	0	20	21	41	25	25	25	20	25	21	2	50	0.92	0.98	0.82	1	0			0.8	0.84	80	84	0.8	0.84	0.82	['PSD placement far away', 'hotknife']	rymert
ordishc-connection_validation-326817565_PDL10g_i_pct	326817565	PDL10g_i_pct	Roughly traced	147	367	43	48	36	47	0	18	18	35	25	25	25	18	25	18	0	50	0.86	0.96	0.72	0.94	0			0.72	0.72	72	72	0.72	0.72	0.7	[]	ordishc
lohffa-connection_validation-327147610_PDL25b_pct	327147610	PDL25b_pct	Roughly traced	360	388	47	49	45	49	5	24	21	44	25	25	25	24	25	21	10	50	0.94	0.98	0.9	0.98	0.1			0.96	0.84	96	84	0.96	0.84	0.88	['low confidence PSD placement', 'PSD not valid?', 'low confidence PSD placement', 'low confidence PSD placement', 'T-bar and PSD not valid?', 'low confidence PSD placement', 'PSD not valid?', 'PSD not valid?', 'low confidence PSD placement', 'PSD not valid?']	lohffa
takemurasa-connection_validation-327509674_ADL09b_b_pct	327509674	ADL09b_b_pct	Roughly traced	99	529	45	50	43	50	0	19	24	43	25	25	25	19	25	24	2	50	0.9	1	0.86	1	0			0.76	0.96	76	96	0.76	0.96	0.86	['False positive Tbar', 'False positive Tbar']	takemurasa
smithc-connection_validation-327844600_PDL17p_pct	327844600	PDL17p_pct	Roughly traced	94	364	48	50	45	49	2	21	24	44	25	25	25	21	25	24	2	50	0.96	1	0.9	0.98	0.04			0.84	0.96	84	96	0.84	0.96	0.88	['Not sure T-bar glyph is on a valid T-bar', 'Not sure T-bar glyph is on a valid T-bar']	smithc
lohffa-connection_validation-327873821_PDM18a_c_pct	327873821	PDM18oc_pct	Roughly traced	79	180	48	50	48	50	1	24	24	48	25	25	25	24	25	24	2	50	0.96	1	0.96	1	0.02			0.96	0.96	96	96	0.96	0.96	0.96	['PSD not valid?', 'low confidence PSD placement']	lohffa
rymert-connection_validation-328188238_ADL02h_a_pct	328188238	ADL02h_a_pct	Roughly traced	139	332	49	50	40	50	2	20	20	40	25	25	25	20	25	20	2	50	0.98	1	0.8	1	0.04			0.8	0.8	80	80	0.8	0.8	0.8	['Unsure if PSD in cleft', 'Unsure if T-bar']	rymert
ogundeyio-connection_validation-328206519_ADL03oa_pct	328206519	ADL03oa_pct	Roughly traced	135	294	48	50	33	50	1	14	19	33	25	25	25	14	25	19	1	50	0.96	1	0.66	1	0.02			0.56	0.76	56	76	0.56	0.76	0.66	['Slight false merge in PSD']	ogundeyio
smithc-connection_validation-328278368_PDM15g_c_pct	328278368	PDM15g_c_pct	Roughly traced	39	241	43	50	39	50	3	21	18	39	25	25	25	21	25	18	7	50	0.86	1	0.78	1	0.06			0.84	0.72	84	72	0.84	0.72	0.78	['T-bar glyph is on a PSD', 'Not sure T-bar glyph is on a valid T-bar', 'Not sure T-bar glyph is on a valid T-bar', 'T-bar glyph is on a PSD for another synapse', 'T-bar glyph is not on a valid T-bar', 'Not sure T-bar glyph is on a valid T-bar', 'T-bar glyph is not on a valid T-bar']	smithc
ogundeyio-connection_validation-328538408_PDL15r_pct	328538408	PDL15r_pct	Roughly traced	256	1292	49	50	30	50	2	16	14	30	25	25	25	16	25	14	2	50	0.98	1	0.6	1	0.04			0.64	0.56	64	56	0.64	0.56	0.6	['Low Confidence PSD', 'Low Confidence PSD']	ogundeyio
takemurasa-connection_validation-328887977_ADL02i_a_pct	328887977	ADL02i_a_pct	Roughly traced	142	679	47	50	41	50	3	19	22	41	25	25	25	19	25	22	4	50	0.94	1	0.82	1	0.06			0.76	0.88	76	88	0.76	0.88	0.82	['Self synapse', 'Low confident PSD', 'Low confident PSD', 'Low confident PSD']	takemurasa
lohffa-connection_validation-329210713_ADL17b_pct	329210713	ADL17b_pct	Roughly traced	295	377	50	50	49	50	5	24	25	49	25	25	25	24	25	25	5	50	1	1	0.98	1	0.1			0.96	1	96	100	0.96	1	0.98	['PSD not valid?', 'T-bar and PSD not valid?', 'PSD not valid?', 'PSD not valid?', 'PSD not valid?']	lohffa
lohffa-connection_validation-329301513_PDM18d_pct	329301513	PDM18d_pct	Roughly traced	405	1808	50	50	48	50	2	24	24	48	25	25	25	24	25	24	4	50	1	1	0.96	1	0.04			0.96	0.96	96	96	0.96	0.96	0.96	['PSD not valid?', 'Multiple T-bars', 'low confidence PSD placement', 'PSD not valid?']	lohffa
lohffa-connection_validation-329561679_put_ADL23g	329561679	ADL23r_pct	Roughly traced	89	425	50	50	50	50	3	25	25	50	25	25	25	25	25	25	3	50	1	1	1	1	0.06			1	1	100	100	1	1	1	['PSD not valid?', 'PSD not valid?', 'PSD not valid?']	lohffa
rymert-connection_validation-329566174_OA_VPM3	329566174	OA-VPM3	Traced	8599	10050	49	50	41	50	0	19	22	41	25	25	25	19	25	22	0	50	0.98	1	0.82	1	0			0.76	0.88	76	88	0.76	0.88	0.82	[]	rymert
smithc-connection_validation-329566197_PDM29g_pct	329566197	PDM29g_pct	Roughly traced	919	2822	48	50	39	50	2	20	19	39	25	25	25	20	25	19	2	50	0.96	1	0.78	1	0.04			0.8	0.76	80	76	0.8	0.76	0.78	['Not sure what body the T-bar glyph is on or if it is a real T-bar', 'Not sure T-bar glyph is on a valid T-bar']	smithc
ogundeyio-connection_validation-329906396_ADL17n_pct	329906396	ADL17n_pct	Roughly traced	114	284	49	50	29	49	1	13	16	29	25	25	25	13	25	16	1	50	0.98	1	0.58	0.98	0.02			0.52	0.64	52	64	0.52	0.64	0.58	['False merge in PSD. One segments is connected to Tbar']	ogundeyio
lohffa-connection_validation-330316013_PDM09om_pct	330316013	PDM09om_pct	Roughly traced	554	1787	46	50	45	49	3	23	22	44	25	25	25	23	25	22	6	50	0.92	1	0.9	0.98	0.06			0.92	0.88	92	88	0.92	0.88	0.88	['PSD not valid?', 'PSD not valid?', 'low confidence PSD placement', 'T-bar is actually PSD.', 'low confidence PSD placement', 'PSD not valid?']	lohffa
lohffa-connection_validation-330604760_put_ADL12s	330604760	ADL12s_pct	Roughly traced	418	671	48	50	48	50	2	23	25	48	25	25	25	23	25	25	4	50	0.96	1	0.96	1	0.04			0.92	1	92	100	0.92	1	0.96	['T-bar and PSD not valid?', 'Multiple T-bars', 'PSD not valid?', 'PSD not valid?']	lohffa
rymert-connection_validation-330640044_PDL05n_pct	330640044	PDL05n_pct	Roughly traced	2011	6824	49	50	41	50	1	20	21	41	25	25	25	20	25	21	1	50	0.98	1	0.82	1	0.02			0.8	0.84	80	84	0.8	0.84	0.82	['Unsure if PSD in cleft']	rymert
lohffa-connection_validation-331343089_PDM09y_pct	331343089	PDM09ou_pct	Roughly traced	346	817	47	50	46	50	1	23	23	46	25	25	25	23	25	23	2	50	0.94	1	0.92	1	0.02			0.92	0.92	92	92	0.92	0.92	0.92	['PSD not valid?', 'T-bar is actually PSD.']	lohffa
takemurasa-connection_validation-355133859_PDL11og_pct	355133859	PDL11og_pct	Roughly traced	164	494	47	50	42	49	1	21	21	42	25	25	25	21	25	21	1	50	0.94	1	0.84	0.98	0.02			0.84	0.84	84	84	0.84	0.84	0.84	['Low confident PSD']	takemurasa
smithc-connection_validation-355816896_PDL13m_b_pct	355816896	PDL13m_pct	Roughly traced	178	402	47	50	38	49	4	20	18	37	25	25	25	20	25	18	4	50	0.94	1	0.76	0.98	0.08			0.8	0.72	80	72	0.8	0.72	0.74	['Not sure T-bar glyph is on a valid T-bar', 'T-bar glyph and PSD glyph should be switched', 'Not sure what body the PSD glyph is supposed to be on', 'Not sure T-bar glyph is on a valid T-bar']	smithc
rymert-connection_validation-356472660_PDM30i_pct	356472660	PDM30i_pct	Roughly traced	296	312	49	50	38	50	2	20	18	38	25	25	25	20	25	18	1	50	0.98	1	0.76	1	0.04			0.8	0.72	80	72	0.8	0.72	0.76	['Unsure if PSD in cleft']	rymert
lohffa-connection_validation-357150583_PDM24j_pct	357150583	PDM24j_pct	Roughly traced	264	293	46	49	44	50	1	21	23	43	25	25	25	21	25	23	4	50	0.92	0.98	0.88	1	0.02			0.84	0.92	84	92	0.84	0.92	0.86	['PSD not valid?', 'low confidence PSD placement', 'low confidence PSD placement', 'low confidence PSD placement']	lohffa
smithc-connection_validation-357250238_PDM11j_a_pct	357250238	PDM11j_pct	Roughly traced	110	606	45	50	35	49	0	15	20	34	25	25	25	15	25	20	5	50	0.9	1	0.7	0.98	0			0.6	0.8	60	80	0.6	0.8	0.68	['T-bar glyph appears to be on a PSD for another synapse', 'T-bar glyph appears to be on a PSD for another synapse', 'T-bar glyph appears to be on a PSD for another synapse', 'T-bar glyph appears to be on a PSD for another synapse', 'T-bar glyph appears to be on a PSD for another synapse']	smithc
takemurasa-connection_validation-357862532_PDL17e_pct	357862532	PDL17e_pct	Roughly traced	285	317	46	49	39	49	2	22	17	39	25	25	25	22	25	17	4	50	0.92	0.98	0.78	0.98	0.04			0.88	0.68	88	68	0.88	0.68	0.78	['Low confident PSD', 'Low confident PSD', 'Split todo placed on 479952665', 'Split todo placed on 480604162']	takemurasa
smithc-connection_validation-357863646_PDL20e_pct	357863646	PDL20e_pct	Roughly traced	336	1053	47	50	37	50	2	20	17	37	25	25	25	20	25	17	3	50	0.94	1	0.74	1	0.04			0.8	0.68	80	68	0.8	0.68	0.74	['T-bar glyph is not on a valid T-bar', 'Not sure T-bar glyph is on a valid T-bar', 'Not sure T-bar glyph is on a valid T-bar']	smithc
takemurasa-connection_validation-358209154_PDL11od_pct	358209154	PDL11od_pct	Roughly traced	130	617	48	50	41	50	0	18	23	41	25	25	25	18	25	23	0	50	0.96	1	0.82	1	0			0.72	0.92	72	92	0.72	0.92	0.82	[]	takemurasa
smithc-connection_validation-358286442_PDM12d_b_pct	358286442	PDM12oo_pct	Roughly traced	179	283	43	49	33	47	6	18	15	31	25	25	25	18	25	15	7	50	0.86	0.98	0.66	0.94	0.12			0.72	0.6	72	60	0.72	0.6	0.62	['Not sure T-bar glyph is on a valid T-bar', 'Not sure T-bar glyph is on a valid T-bar', 'Hot knife stitch makes it hard to discern if T-bar glyph is on a valid T-bar', 'Not sure T-bar glyph is on a valid T-bar', 'Not sure T-bar glyph is on a valid T-bar', 'Not sure T-bar glyph is on a valid T-bar', 'T-bar glyph is not a valid T-bar']	smithc
rymert-connection_validation-358501372_PDL13x_pct	358501372	PDL13x_pct	Roughly traced	106	332	50	50	47	50	0	23	24	47	25	25	25	23	25	24	0	50	1	1	0.94	1	0			0.92	0.96	92	96	0.92	0.96	0.94	[]	rymert
rymert-connection_validation-358545984_PDL11oj_pct	358545984	PDL11oj_pct	Roughly traced	140	348	50	50	40	47	1	22	18	38	25	25	25	22	25	18	1	50	1	1	0.8	0.94	0.02			0.88	0.72	88	72	0.88	0.72	0.76	['Unsure if PSD in cleft']	rymert
smithc-connection_validation-358613830_PDM24e_pct	358613830	PDM24e_pct	Roughly traced	242	370	49	50	43	50	0	23	20	43	25	25	25	23	25	20	1	50	0.98	1	0.86	1	0			0.92	0.8	92	80	0.92	0.8	0.86	['T-bar glyph is not on a valid T-bar']	smithc
lohffa-connection_validation-359219503_ADL03x_pct	359219503	ADL03x_pct	Roughly traced	198	332	48	49	48	50	0	23	25	48	25	25	25	23	25	25	3	50	0.96	0.98	0.96	1	0			0.92	1	92	100	0.92	1	0.96	['T-bar is actually PSD.', 'low confidence PSD placement.', 'low confidence PSD placement']	lohffa
takemurasa-connection_validation-359292188_ADM07g_a_pct	359292188	ADM07g_pct	Roughly traced	145	948	46	50	42	49	0	23	19	42	26	24	26	23	24	19	1	50	0.92	1	0.84	0.98	0			0.884615385	0.791666667	88.46153846	79.16666667	0.884615385	0.791666667	0.84	['359292188 is split']	takemurasa
lohffa-connection_validation-359897288_AVM13r_pct	359897288	AVM13r_pct	Roughly traced	157	488	50	50	50	50	1	25	25	50	25	25	25	25	25	25	2	50	1	1	1	1	0.02			1	1	100	100	1	1	1	['PSD not valid?', 'low confidence PSD placement']	lohffa
smithc-connection_validation-359913782_ADL17m_c_pct	359913782	ADL17m_c_pct	Roughly traced	99	346	48	50	40	49	2	21	19	39	25	25	25	21	25	19	2	50	0.96	1	0.8	0.98	0.04			0.84	0.76	84	76	0.84	0.76	0.78	['Not sure T-bar glyph is on a valid T-bar', 'Not sure T-bar glyph is on a valid T-bar']	smithc
takemurasa-connection_validation-359926923_ADL02j_c_pct	359926923	ADL02j_c_pct	Roughly traced	102	352	49	49	44	50	5	22	22	44	25	25	25	22	25	22	5	50	0.98	0.98	0.88	1	0.1			0.88	0.88	88	88	0.88	0.88	0.88	['Less confident PSD', 'Less confident PSD', 'Low confident PSD', 'Low confident PSD', 'Low confident PSD']	takemurasa
lohffa-connection_validation-360237650_ADL22g_pct	360237650	ADL22g_pct	Roughly traced	148	468	50	50	47	49	1	22	25	46	25	25	25	22	25	25	2	50	1	1	0.94	0.98	0.02			0.88	1	88	100	0.88	1	0.92	['low confidence PSD placement', 'PSD not valid?']	lohffa
rymert-connection_validation-360254108_PDM07j_pct	360254108	PDM07j_pct	Roughly traced	302	817	46	49	39	50	1	20	19	39	25	25	25	20	25	19	3	50	0.92	0.98	0.78	1	0.02			0.8	0.76	80	76	0.8	0.76	0.78	['HK', 'HK', 'HK']	rymert
takemurasa-connection_validation-360932188_ADL03p_pct	360932188	ADL03p_pct	Roughly traced	128	128	50	50	46	50	0	24	22	46	25	25	25	24	25	22	0	50	1	1	0.92	1	0			0.96	0.88	96	88	0.96	0.88	0.92	[]	takemurasa
rymert-connection_validation-361264970_ADL15f_a_pct	361264970	ADL15f_a_pct	Roughly traced	153	473	50	50	40	49	0	16	24	39	25	25	25	16	25	24	0	50	1	1	0.8	0.98	0			0.64	0.96	64	96	0.64	0.96	0.78	[]	rymert
takemurasa-connection_validation-361364000_FB7I	361364000	FB7E	Roughly traced	283	1451	49	50	45	50	0	21	24	45	25	25	25	21	25	24	0	50	0.98	1	0.9	1	0			0.84	0.96	84	96	0.84	0.96	0.9	[]	takemurasa
rymert-connection_validation-361959852_AVL10b_a_pct	361959852	AVL10oj_pct	Roughly traced	75	399	50	50	44	50	0	22	22	44	25	25	25	22	25	22	0	50	1	1	0.88	1	0			0.88	0.88	88	88	0.88	0.88	0.88	[]	rymert
lohffa-connection_validation-362299997_ADL15a_pct	362299997	ADL15a_pct	Roughly traced	252	629	50	50	48	50	1	23	25	48	25	25	25	23	25	25	3	50	1	1	0.96	1	0.02			0.92	1	92	100	0.92	1	0.96	['low confidence PSD placement', 'T-bar not valid?', 'low confidence PSD placement']	lohffa
rymert-connection_validation-386821081_PDL13od_pct	386821081	PDL13od_pct	Roughly traced	186	237	47	50	41	47	2	20	21	38	25	25	25	20	25	21	2	50	0.94	1	0.82	0.94	0.04			0.8	0.84	80	84	0.8	0.84	0.76	['Unsure if T-bar', 'Unsure if Bad placement or bad seg']	rymert
rymert-connection_validation-386825636_PDL13oe_pct	386825636	PDL13oe_pct	Roughly traced	127	364	49	50	45	47	0	22	23	42	25	25	25	22	25	23	0	50	0.98	1	0.9	0.94	0			0.88	0.92	88	92	0.88	0.92	0.84	[]	rymert
ordishc-connection_validation-386833812_PDL16w_pct	386833812	PDL16w_pct	Traced	133	603	45	50	40	50	0	19	21	40	25	25	25	19	25	21	0	50	0.9	1	0.8	1	0			0.76	0.84	76	84	0.76	0.84	0.8	[]	ordishc
smithc-connection_validation-386838513_PDL14c_pct	386838513	PDL14c_pct	Roughly traced	231	366	49	48	42	46	1	22	20	37	25	25	25	22	25	20	2	50	0.98	0.96	0.84	0.92	0.02			0.88	0.8	88	80	0.88	0.8	0.74	['Not sure T-bar glyph is on a valid T-bar', 'Hotknife stitch creates false merge in T-bar body']	smithc
rymert-connection_validation-386877197_PDM10oc_pct	386877197	PDM10oc_pct	Roughly traced	221	911	50	50	45	50	0	24	21	45	25	25	25	24	25	21	0	50	1	1	0.9	1	0			0.96	0.84	96	84	0.96	0.84	0.9	[]	rymert
rymert-connection_validation-388280137_PDM11m_a_pct	388280137	PDM11m_a_pct	Roughly traced	109	694	50	50	45	49	0	21	24	44	26	24	26	21	24	24	0	50	1	1	0.9	0.98	0			0.807692308	1	80.76923077	100	0.807692308	1	0.88	[]	rymert
lohffa-connection_validation-388898102_PDL11oi_pct	388898102	PDL11oi_pct	Roughly traced	147	477	49	50	49	48	3	24	25	47	25	25	25	24	25	25	4	50	0.98	1	0.98	0.96	0.06			0.96	1	96	100	0.96	1	0.94	['low confidence PSD placement', 'PSD not valid?', 'PSD not valid?', 'PSD not valid?']	lohffa
rymert-connection_validation-388898182_PDL11oc_pct	388898182	PDL11oc_pct	Roughly traced	190	701	50	50	39	50	0	21	18	39	25	25	25	21	25	18	1	50	1	1	0.78	1	0			0.84	0.72	84	72	0.84	0.72	0.78	['Psd glyph placed far away']	rymert
takemurasa-connection_validation-388902666_PDL11n_pct	388902666	PDL11n_pct	Roughly traced	146	481	45	50	40	49	2	22	18	40	25	25	25	22	25	18	7	50	0.9	1	0.8	0.98	0.04			0.88	0.72	88	72	0.88	0.72	0.8	['Low confident PSD', 'Low confident PSD', 'False positive Tbar', 'False positive Tbar', 'False positive Tbar', 'Split todo placed', 'False positive Tbar']	takemurasa
rymert-connection_validation-388954086_PDL05k_pct	388954086	PDL05k_pct	Roughly traced	748	2695	47	50	35	48	0	14	21	33	25	25	25	14	25	21	0	50	0.94	1	0.7	0.96	0			0.56	0.84	56	84	0.56	0.84	0.66	[]	rymert
smithc-connection_validation-389303772_PDL07p_pct	389303772	PDL07p_pct	Roughly traced	275	929	45	50	37	50	3	17	20	37	25	25	25	17	25	20	5	50	0.9	1	0.74	1	0.06			0.68	0.8	68	80	0.68	0.8	0.74	['Not sure T-bar glyph is on a valid T-bar', 'T-bar glyph and PSD glyph should be switched', 'Not sure the T-bar glyph is on a valid T-bar', 'Not sure what body the T-bar glyph is on', 'Not sure T-bar glyph is on a valid T-bar']	smithc
rymert-connection_validation-389311717_PDL05oj_pct	389311717	PDL05oj_pct	Roughly traced	612	1996	49	50	41	50	1	18	23	41	25	25	25	18	25	23	1	50	0.98	1	0.82	1	0.02			0.72	0.92	72	92	0.72	0.92	0.82	['Unsure if PSD in cleft']	rymert
lohffa-connection_validation-389545760_ADL24c_pct	389545760	ADL24c_pct	Roughly traced	912	2905	49	50	47	49	2	23	24	46	25	25	25	23	25	24	9	50	0.98	1	0.94	0.98	0.04			0.92	0.96	92	96	0.92	0.96	0.92	['PSD not valid?', 'low confidence PSD placement', 'low confidence PSD placement', 'low confidence PSD placement', 'low confidence PSD placement', 'low confidence PSD placement', 'Multiple T-bars. PSD affected by nearby T-bar. ', 'PSD not valid?', 'T-bar is actually PSD.']	lohffa
lohffa-connection_validation-389563849_put_PDM05q	389563849	PDM05w_pct	Roughly traced	181	602	49	50	47	50	4	25	22	47	25	25	25	25	25	22	8	50	0.98	1	0.94	1	0.08			1	0.88	100	88	1	0.88	0.94	['Multiple T-bars', 'Multiple T-bars', 'Multiple T-bars', 'PSD not valid?', 'low confidence PSD placement', 'PSD not valid?', 'PSD not valid?', 'T-bar and PSD not valid?']	lohffa
rymert-connection_validation-389575937_ADL20e_a_pct	389575937	ADL20e_a_pct	Roughly traced	167	541	48	50	43	48	0	20	23	43	25	25	25	20	25	23	3	50	0.96	1	0.86	0.96	0			0.8	0.92	80	92	0.8	0.92	0.86	['PSD placed far away', 'hotknife', 'odd PSD glyph placement']	rymert
rymert-connection_validation-389657555_PDM24k_pct	389657555	PDM24k_pct	Roughly traced	426	1937	48	50	41	50	0	21	20	41	25	25	25	21	25	20	0	50	0.96	1	0.82	1	0			0.84	0.8	84	80	0.84	0.8	0.82	[]	rymert
lohffa-connection_validation-390271275_ADL07n_pct	390271275	ADL07n_pct	Roughly traced	642	1598	49	50	49	50	3	24	25	49	25	25	25	24	25	25	5	50	0.98	1	0.98	1	0.06			0.96	1	96	100	0.96	1	0.98	['low confidence PSD placement', 'PSD not valid?', 'PSD not valid?', 'PSD not valid?', 'low confidence PSD placement']	lohffa
rymert-connection_validation-390330983_ADL29g_pct	390330983	ADL29g_pct	Roughly traced	247	854	45	50	40	48	3	20	20	39	25	25	25	20	25	20	2	50	0.9	1	0.8	0.96	0.06			0.8	0.8	80	80	0.8	0.8	0.78	['PSD btwn. 2 cells, and seg. bleed over', 'Unsure if T-bar']	rymert
smithc-connection_validation-390564245_ADL18d_a_pct	390564245	ADL18v_pct	Roughly traced	196	639	49	50	40	48	1	23	17	38	25	25	25	23	25	17	1	50	0.98	1	0.8	0.96	0.02			0.92	0.68	92	68	0.92	0.68	0.76	['Not sure T-bar glyph is on a valid T-bar']	smithc
ogundeyio-connection_validation-390607680_ADL02olb_pct	390607680	ADL02olb_pct	Roughly traced	87	248	50	50	33	50	1	17	16	33	25	25	25	17	25	16	1	50	1	1	0.66	1	0.02			0.68	0.64	68	64	0.68	0.64	0.66	['Low Confidence PSD']	ogundeyio
lohffa-connection_validation-390616496_put_AVM15b	390616496	AVM15b_pct	Roughly traced	180	243	50	50	50	49	4	25	25	49	25	25	25	25	25	25	5	50	1	1	1	0.98	0.08			1	1	100	100	1	1	0.98	['PSD affectd by nearby T-bar.', 'Multiple T-bars', 'PSD not valid?', 'PSD not valid?', 'PSD not valid?']	lohffa
smithc-connection_validation-390918452_ADL18j_pct	390918452	ADL18j_pct	Roughly traced	148	443	49	50	40	50	1	20	20	40	25	25	25	20	25	20	1	50	0.98	1	0.8	1	0.02			0.8	0.8	80	80	0.8	0.8	0.8	['Not sure T-bar glyph is on a valid T-bar']	smithc
smithc-connection_validation-391610069_PDM10ob_pct	391610069	PDM10ob_pct	Roughly traced	381	852	48	50	35	49	1	14	21	34	25	25	25	14	25	21	3	50	0.96	1	0.7	0.98	0.02			0.56	0.84	56	84	0.56	0.84	0.68	['T-bar glyph is not on a valid T-bar', 'T-bar glyph is not on a valid T-bar', 'hotknife stitch obscures the synapse']	smithc
takemurasa-connection_validation-391971839_PDL15ob_pct	391971839	PDL15ob_pct	Roughly traced	292	770	45	50	42	50	0	22	20	42	25	25	25	22	25	20	0	50	0.9	1	0.84	1	0			0.88	0.8	88	80	0.88	0.8	0.84	[]	takemurasa
lohffa-connection_validation-392368893_put_PDL06f	392368893	PDL06f_pct	Roughly traced	569	1315	48	50	44	50	4	22	22	44	25	25	25	22	25	22	5	50	0.96	1	0.88	1	0.08			0.88	0.88	88	88	0.88	0.88	0.88	['PSD not valid?', 'T-bar not valid?', 'PSD not valid?', 'low confidence PSD placement', 'T-bar not valid?']	lohffa
ogundeyio-connection_validation-393404592_ADM07ok_pct	393404592	ADM07ok_pct	Roughly traced	648	2454	50	50	40	50	0	22	18	40	25	25	25	22	25	18	0	50	1	1	0.8	1	0			0.88	0.72	88	72	0.88	0.72	0.8	[]	ogundeyio
lohffa-connection_validation-417550216_PDL17m_pct	417550216	PDL17m_pct	Roughly traced	1293	2377	46	50	43	49	2	23	20	42	25	25	25	23	25	20	4	50	0.92	1	0.86	0.98	0.04			0.92	0.8	92	80	0.92	0.8	0.84	['low confidence PSD placement', 'PSD not valid?', 'low confidence PSD placement', 'PSD not valid?']	lohffa
takemurasa-connection_validation-417558532_PDM10og_pct	417558532	PDM10og_pct	Roughly traced	393	1233	49	50	44	50	1	25	19	44	25	25	25	25	25	19	1	50	0.98	1	0.88	1	0.02			1	0.76	100	76	1	0.76	0.88	['Low confident PSD']	takemurasa
ogundeyio-connection_validation-418224293_PDL10j_b_pct	418224293	PDL10j_b_pct	Roughly traced	231	589	48	50	38	49	1	17	21	37	25	25	25	17	25	21	1	50	0.96	1	0.76	0.98	0.02			0.68	0.84	68	84	0.68	0.84	0.74	['Slight false merge on PSD to another RT body']	ogundeyio
knechtc-connection_validation-418556051_put_ADL20k	418556051	ADL20k_pct	Roughly traced	240	1054	47	47	39	44	1	22	17	39	25	25	25	22	25	17	0	50	0.94	0.94	0.78	0.88	0.02			0.88	0.68	88	68	0.88	0.68	0.78	[]	knechtc
rymert-connection_validation-418641700_PDM24_pct	418641700	PDM24_pct	Roughly traced	329	1190	45	50	41	49	3	19	22	40	25	25	25	19	25	22	4	50	0.9	1	0.82	0.98	0.06			0.76	0.88	76	88	0.76	0.88	0.8	['hotknife', 'obscured by T-bar', 'hotknife', 'Synpase obscured by hotknife']	rymert
takemurasa-connection_validation-418875451_PDL10g_e_pct	418875451	PDL10g_c_pct	Roughly traced	114	338	49	50	48	50	0	25	23	48	25	25	25	25	25	23	0	50	0.98	1	0.96	1	0			1	0.92	100	92	1	0.92	0.96	[]	takemurasa
takemurasa-connection_validation-418897332_PDL13c_pct	418897332	PDL13c_pct	Roughly traced	153	414	48	50	44	50	0	23	21	44	25	25	25	23	25	21	0	50	0.96	1	0.88	1	0			0.92	0.84	92	84	0.92	0.84	0.88	[]	takemurasa
takemurasa-connection_validation-419889751_ADL11s_pct	419889751	ADL11s_pct	Roughly traced	138	178	49	50	44	49	1	23	21	44	25	25	25	23	25	21	2	50	0.98	1	0.88	0.98	0.02			0.92	0.84	92	84	0.92	0.84	0.88	['Low confident Tbar and PSD', 'Split todo placed']	takemurasa
ogundeyio-connection_validation-419907780_PVL20d_pct	419907780	PVL20d_pct	Roughly traced	993	507	49	50	17	50	2	10	7	17	25	25	25	10	25	7	2	50	0.98	1	0.34	1	0.04			0.4	0.28	40	28	0.4	0.28	0.34	['Low Confidence PSD', 'Low Confidence PSD']	ogundeyio
lohffa-connection_validation-420235118_put_ADL11g	420235118	ADL11g_pct	Roughly traced	120	124	49	50	47	50	2	24	23	47	25	25	25	24	25	23	6	50	0.98	1	0.94	1	0.04			0.96	0.92	96	92	0.96	0.92	0.94	['low confidence PSD placement', 'low confidence PSD placement', 'PSD not valid?', 'low confidence PSD placement', 'low confidence PSD placement', 'Multiple T-bars. PSD affected by nearby T-bar.']	lohffa
lohffa-connection_validation-420325753_PDM09x_pct	420325753	PDM09x_pct	Roughly traced	979	2388	50	50	50	49	4	25	25	49	25	25	25	25	25	25	7	50	1	1	1	0.98	0.08			1	1	100	100	1	1	0.98	['low confidence PSD placement', 'T-bar and PSD not valid?', 'PSD not valid?', 'PSD not valid?', 'low confidence PSD placement', 'low confidence PSD placement', 'PSD not valid?']	lohffa
lohffa-connection_validation-420586101_PDL17j_pct	420586101	PDL17j_pct	Roughly traced	337	1102	47	50	44	49	2	20	24	44	25	25	25	20	25	24	4	50	0.94	1	0.88	0.98	0.04			0.8	0.96	80	96	0.8	0.96	0.88	['PSD not valid?', 'low confidence PSD placement', 'PSD not valid?', 'low confidence PSD placement']	lohffa
ogundeyio-connection_validation-420598392_ADL03om_pct	420598392	ADL03om_pct	Roughly traced	125	263	50	50	33	50	0	16	17	33	25	25	25	16	25	17	0	50	1	1	0.66	1	0			0.64	0.68	64	68	0.64	0.68	0.66	[]	ogundeyio
lohffa-connection_validation-420908078_ADL24d_pct	420908078	ADL24d_pct	Roughly traced	864	1291	48	50	45	50	1	24	21	45	25	25	25	24	25	21	2	50	0.96	1	0.9	1	0.02			0.96	0.84	96	84	0.96	0.84	0.9	['PSD not valid?', 'low confidence PSD placement']	lohffa
lohffa-connection_validation-420956527_ADL13r_pct	420956527	ADL13r_pct	Roughly traced	197	524	50	50	50	50	2	25	25	50	25	25	25	25	25	25	3	50	1	1	1	1	0.04			1	1	100	100	1	1	1	['low confidence PSD placement', 'PSD not valid?', 'PSD not valid?']	lohffa
rymert-connection_validation-421297485_ADL03oj_pct	421297485	ADL03oj_pct	Roughly traced	729	1416	48	50	35	50	1	21	14	35	25	25	25	21	25	14	2	50	0.96	1	0.7	1	0.02			0.84	0.56	84	56	0.84	0.56	0.7	['hotknife', 'Unsure if PSD in cleft']	rymert
rymert-connection_validation-421641859_PDL11k_pct	421641859	PDL11k_pct	Roughly traced	1065	5140	49	50	43	48	0	21	22	41	25	25	25	21	25	22	0	50	0.98	1	0.86	0.96	0			0.84	0.88	84	88	0.84	0.88	0.82	[]	rymert
lohffa-connection_validation-421650982_ADL03og_pct	421650982	ADL03og_pct	Roughly traced	214	356	49	50	49	50	5	25	24	49	25	25	25	25	25	24	6	50	0.98	1	0.98	1	0.1			1	0.96	100	96	1	0.96	0.98	['low confidence PSD placement', 'PSD not valid?', 'PSD not valid?', 'PSD not valid?', 'PSD not valid?', 'PSD not valid?']	lohffa
takemurasa-connection_validation-422056521_PVL04n_pct	422056521	PVL04n_pct	Roughly traced	238	789	44	50	40	50	1	21	19	40	25	25	25	21	25	19	3	50	0.88	1	0.8	1	0.02			0.84	0.76	84	76	0.84	0.76	0.8	['Not a Tbar but PSD', 'Low confident Tbar and PSD', 'Tbar should be placed on the body 515588291']	takemurasa
rymert-connection_validation-424025668_PDL05c_pct	424025668	PDL05c_pct	Roughly traced	212	399	49	49	47	48	2	23	24	46	25	25	25	23	25	24	4	50	0.98	0.98	0.94	0.96	0.04			0.92	0.96	92	96	0.92	0.96	0.92	['HK', 'Unsure if PSD in cleft', 'HK', 'HK']	rymert
lohffa-connection_validation-424434994_PDM08b_pct	424434994	PDM08b_pct	Traced	1105	2742	48	50	47	50	4	23	24	47	25	25	25	23	25	24	7	50	0.96	1	0.94	1	0.08			0.92	0.96	92	96	0.92	0.96	0.94	['low confidence PSD placement', 'PSD not valid?', 'PSD not valid?', 'PSD not valid?', 'low confidence PSD placement', 'PSD not valid?', 'low confidence PSD placement']	lohffa
lohffa-connection_validation-448342846_PDM08oh_pct	448342846	PDM08oh_pct	Roughly traced	879	6650	46	50	46	50	3	22	24	46	25	25	25	22	25	24	4	50	0.92	1	0.92	1	0.06			0.88	0.96	88	96	0.88	0.96	0.92	['PSD not valid?', 'PSD not valid?', 'Multipl T-bars. PSD affected by nearby T-bar. ', 'PSD not valid?']	lohffa
ogundeyio-connection_validation-449285328_PDM10ok_pct	449285328	PDM10ok_pct	Roughly traced	145	262	47	50	33	49	2	18	15	32	25	25	25	18	25	15	2	50	0.94	1	0.66	0.98	0.04			0.72	0.6	72	60	0.72	0.6	0.64	['False merge in PSD causing smal segments to be merged to a RT body', 'Low Confidence PSD']	ogundeyio
smithc-connection_validation-449910491_PDL10g_j_pct	449910491	PDL10g_j_pct	Roughly traced	299	542	45	50	36	50	5	19	17	36	25	25	25	19	25	17	5	50	0.9	1	0.72	1	0.1			0.76	0.68	76	68	0.76	0.68	0.72	['Not sure T-bar glyph is on a valid T-bar', 'Not sure T-bar glyph is on a valid T-bar', 'Not sure T-bar glyph is on a valid T-bar', 'T-bar glyph and PSD glyph seem to be on the same body', 'PSD and T-bar glyphs should be switched']	smithc
rymert-connection_validation-449931630_PDL17b_a_pct	449931630	PDL17b_pct	Roughly traced	72	257	47	49	34	49	0	15	19	33	25	25	25	15	25	19	0	50	0.94	0.98	0.68	0.98	0			0.6	0.76	60	76	0.6	0.76	0.66	[]	rymert
takemurasa-connection_validation-450285679_PDM10z_pct	450285679	PDM10z_pct	Roughly traced	61	320	47	50	47	50	4	25	22	47	25	25	25	25	25	22	7	50	0.94	1	0.94	1	0.08			1	0.88	100	88	1	0.88	0.94	['Low confident PSD', 'False positive Tbar', 'Low confident PSD', 'Low confident PSD', 'Low confident PSD', 'False positive Tbar', 'False positive Tbar']	takemurasa
ogundeyio-connection_validation-450574212_ADL11j_a_pct	450574212	ADL11j_a_pct	Roughly traced	123	158	49	50	36	50	5	16	20	36	25	25	25	16	25	20	5	50	0.98	1	0.72	1	0.1			0.64	0.8	64	80	0.64	0.8	0.72	['Low Confidence PSD', 'Low Confidence PSD', 'Low Confidence PSD', 'Low Confidence PSD', 'Low Confidence PSD']	ogundeyio
ogundeyio-connection_validation-451952653_ADL07w_pct	451952653	ADL07w_pct	Roughly traced	367	475	47	50	34	50	2	17	17	34	25	25	25	17	25	17	2	50	0.94	1	0.68	1	0.04			0.68	0.68	68	68	0.68	0.68	0.68	['Low Confidence PSD', 'Low Confidence PSD']	ogundeyio
ordishc-connection_validation-451995819_ADL13c_a_pct	451995819	ADL13c_pct	Roughly traced	219	352	49	50	45	48	0	22	23	43	25	25	25	22	25	23	0	50	0.98	1	0.9	0.96	0			0.88	0.92	88	92	0.88	0.92	0.86	[]	ordishc
ordishc-connection_validation-452676790_ADL04h_pct	452676790	ADL04h_pct	Roughly traced	485	466	47	50	37	50	0	18	19	37	25	25	25	18	25	19	0	50	0.94	1	0.74	1	0			0.72	0.76	72	76	0.72	0.76	0.74	[]	ordishc
lohffa-connection_validation-453053044_put_PDL15q	453053044	PDL15q_pct	Roughly traced	218	308	50	50	50	49	2	25	25	49	25	25	25	25	25	25	4	50	1	1	1	0.98	0.04			1	1	100	100	1	1	0.98	['low confidence PSD placement', 'PSD not valid?', 'PSD not valid?', 'low confidence PSD placement']	lohffa
smithc-connection_validation-454002974_AVL27b_pct	454002974	AVL27b_pct	Roughly traced	1210	2423	49	50	37	50	1	19	18	37	25	25	25	19	25	18	1	50	0.98	1	0.74	1	0.02			0.76	0.72	76	72	0.76	0.72	0.74	['Not sure T-bar glyph is on a valid T-bar']	smithc
takemurasa-connection_validation-455172836_PDM15c_pct	455172836	PDM15c_pct	Roughly traced	328	781	46	50	43	50	2	19	24	43	25	25	25	19	25	24	2	50	0.92	1	0.86	1	0.04			0.76	0.96	76	96	0.76	0.96	0.86	['Low confident PSD', 'Low confident Tbar']	takemurasa
lohffa-connection_validation-456432557_ADL19i_b_pct	456432557	ADL19i_pct	Roughly traced	126	322	48	50	46	50	0	22	24	46	25	25	25	22	25	24	1	50	0.96	1	0.92	1	0			0.88	0.96	88	96	0.88	0.96	0.92	['Multiple T-bars.']	lohffa
rymert-connection_validation-456847100_ADL16s_pct	456847100	ADL16s_pct	Roughly traced	2134	2503	49	50	44	50	0	23	21	44	25	25	25	23	25	21	0	50	0.98	1	0.88	1	0			0.92	0.84	92	84	0.92	0.84	0.88	[]	rymert
smithc-connection_validation-477918443_DN2	477918443	DN2	Roughly traced	38	463	42	50	39	50	2	17	22	39	25	25	25	17	25	22	8	50	0.84	1	0.78	1	0.04			0.68	0.88	68	88	0.68	0.88	0.78	['T-bar glyph is not on a valid T-bar', 'T-bar glyph is not on a valid T-bar', 'Not sure T-bar glyph is on a valid T-bar', 'T-bar glyph is not on a valid T-bar', 'T-bar glyph and PSD glyph should be switched', 'T-bar glyph is not on a valid T-bar', 'T-bar glyph is on a PSD', 'Not sure T-bar glyph is on a valid T-bar because of hotknife stitch']	smithc
takemurasa-connection_validation-478591447_PDL11b_pct	478591447	PDL11b_pct	Roughly traced	1067	3065	48	50	46	50	1	23	23	46	25	25	25	23	25	23	3	50	0.96	1	0.92	1	0.02			0.92	0.92	92	92	0.92	0.92	0.92	['False positive Tbar', 'Low confident PSD', 'False positive Tbar']	takemurasa
ogundeyio-connection_validation-479925776_ADL07j_pct	479925776	ADL07j_pct	Roughly traced	257	621	49	49	34	50	2	19	15	34	25	25	25	19	25	15	2	50	0.98	0.98	0.68	1	0.04			0.76	0.6	76	60	0.76	0.6	0.68	['False merge in Tbar body. Tbar does not exist on the segment it was placed on', 'Low Confidence psd']	ogundeyio
takemurasa-connection_validation-479987085_PDL07x_pct	479987085	PDL07x_pct	Roughly traced	83	389	48	50	45	50	0	23	22	45	25	25	25	23	25	22	0	50	0.96	1	0.9	1	0			0.92	0.88	92	88	0.92	0.88	0.9	[]	takemurasa
takemurasa-connection_validation-480219247_PDL06g_pct	480219247	PDL06g_pct	Roughly traced	810	1654	50	50	43	49	1	21	22	42	25	25	25	21	25	22	2	50	1	1	0.86	0.98	0.02			0.84	0.88	84	88	0.84	0.88	0.84	['Split todo placed', 'Low confident PSD']	takemurasa
rymert-connection_validation-480253500_ADL10g_f_pct	480253500	ADL10g_f_pct	Roughly traced	123	245	50	50	40	50	0	18	22	40	25	25	25	18	25	22	0	50	1	1	0.8	1	0			0.72	0.88	72	88	0.72	0.88	0.8	[]	rymert
takemurasa-connection_validation-480258191_ADL10p_pct	480258191	ADL10p_pct	Roughly traced	107	201	44	49	38	50	0	20	18	38	25	25	25	20	25	18	4	50	0.88	0.98	0.76	1	0			0.8	0.72	80	72	0.8	0.72	0.76	['False positive Tbar', 'False positive', 'False positive Tbar', 'Tbar should be on 603354439']	takemurasa
rymert-connection_validation-480328501_PDM10of_pct	480328501	PDM10of_pct	Roughly traced	241	520	48	50	42	50	0	21	21	42	25	25	25	21	25	21	0	50	0.96	1	0.84	1	0			0.84	0.84	84	84	0.84	0.84	0.84	[]	rymert
rymert-connection_validation-480698453_PDM05j_g_pct-complete	480698453	PDM05og_pct	Roughly traced	119	348	45	50	41	50	0	22	19	41	25	25	25	22	25	19	0	50	0.9	1	0.82	1	0			0.88	0.76	88	76	0.88	0.76	0.82	[]	rymert
ogundeyio-connection_validation-480931947_PDL23k_pct	480931947	PDL23k_pct	Roughly traced	280	329	46	50	34	50	0	17	17	34	25	25	25	17	25	17	0	50	0.92	1	0.68	1	0			0.68	0.68	68	68	0.68	0.68	0.68	[]	ogundeyio
takemurasa-connection_validation-481410841_PDM05j_b_pct	481410841	PDM05ob_pct	Roughly traced	122	576	49	50	46	50	0	23	23	46	25	25	25	23	25	23	1	50	0.98	1	0.92	1	0			0.92	0.92	92	92	0.92	0.92	0.92	['I believe a Tbar is false positive']	takemurasa
takemurasa-connection_validation-481600824_ADL11q_pct	481600824	ADL11q_pct	Roughly traced	185	285	47	50	43	49	0	22	21	43	25	25	25	22	25	21	1	50	0.94	1	0.86	0.98	0			0.88	0.84	88	84	0.88	0.84	0.86	['Self synapse']	takemurasa
smithc-connection_validation-482633514_ADL16a_pct	482633514	ADL16u_pct	Roughly traced	337	642	50	50	35	50	0	16	19	35	25	25	25	16	25	19	0	50	1	1	0.7	1	0			0.64	0.76	64	76	0.64	0.76	0.7	[]	smithc
takemurasa-connection_validation-482974860_PDL22f_pct	482974860	PDL22f_pct	Roughly traced	162	115	43	50	34	50	2	17	17	34	25	25	25	17	25	17	2	50	0.86	1	0.68	1	0.04			0.68	0.68	68	68	0.68	0.68	0.68	['Low confident PSD', 'Low confident Tbar']	takemurasa
ordishc-connection_validation-483021600_ADL13k_pct	483021600	ADL13k_pct	Roughly traced	141	284	48	50	36	50	0	18	18	36	25	25	25	18	25	18	0	50	0.96	1	0.72	1	0			0.72	0.72	72	72	0.72	0.72	0.72	[]	ordishc
smithc-connection_validation-483025785_AVM03i_pct	483025785	AVM03i_pct	Roughly traced	363	401	46	50	34	50	4	18	16	34	25	25	25	18	25	16	4	50	0.92	1	0.68	1	0.08			0.72	0.64	72	64	0.72	0.64	0.68	['Not sure T-bar glyph is on a valid T-bar', 'Not sure T-bar glyph is on a valid T-bar', 'Not sure T-bar glyph is on a valid T-bar', 'Not sure T-bar glyph is on a valid T-bar']	smithc
rymert-connection_validation-483042692_ADL18m_pct	483042692	ADL18m_pct	Roughly traced	140	407	49	50	44	49	3	25	19	43	26	24	26	25	24	19	4	50	0.98	1	0.88	0.98	0.06			0.961538462	0.791666667	96.15384615	79.16666667	0.961538462	0.791666667	0.86	['Unsure if T-bar', 'PSD cell may need MED split', 'grayscale ripple. Unable to see if PSD is in', 'Unsure if T-bar of PSD']	rymert
lohffa-connection_validation-483720758_PDL18f_pct	483720758	PDL18f_pct	Roughly traced	456	1118	50	50	46	49	1	22	24	46	25	25	25	22	25	24	1	50	1	1	0.92	0.98	0.02			0.88	0.96	88	96	0.88	0.96	0.92	['PSD not valid?']	lohffa
rymert-connection_validation-484821546_PVM09f_pct	484821546	PVM09f_pct	Roughly traced	504	2204	50	50	46	50	1	24	22	46	25	25	25	24	25	22	1	50	1	1	0.92	1	0.02			0.96	0.88	96	88	0.96	0.88	0.92	['Synapse obscured by HK']	rymert
lohffa-connection_validation-485249150_PDL05on_pct	485249150	PDL05on_pct	Leaves	957	4453	49	50	44	50	2	22	22	44	25	25	25	22	25	22	2	50	0.98	1	0.88	1	0.04			0.88	0.88	88	88	0.88	0.88	0.88	['PSD not valid?', 'PSD not valid?']	lohffa
lohffa-connection_validation-485430376_ADL03k_a_pct	485430376	ADL03k_a_pct	Roughly traced	294	416	49	50	47	50	2	23	24	47	25	25	25	23	25	24	2	50	0.98	1	0.94	1	0.04			0.92	0.96	92	96	0.92	0.96	0.94	['PSD not valid?', 'PSD not valid?']	lohffa
ogundeyio-connection_validation-487144598_ADL01on_pct	487144598	ADL01on_pct	Roughly traced	3047	11399	49	50	36	50	0	15	21	36	25	25	25	15	25	21	0	50	0.98	1	0.72	1	0			0.6	0.84	60	84	0.6	0.84	0.72	[]	ogundeyio
lohffa-connection_validation-487968933_ADL12y_pct	487968933	ADL12y_pct	Roughly traced	678	2635	49	50	48	50	0	25	23	48	25	25	25	25	25	23	1	50	0.98	1	0.96	1	0			1	0.92	100	92	1	0.92	0.96	['low confidence PSD placement']	lohffa
takemurasa-connection_validation-488231898_ADL19g_pct	488231898	ADL19g_pct	Roughly traced	462	1924	47	50	40	50	0	17	23	40	25	25	25	17	25	23	0	50	0.94	1	0.8	1	0			0.68	0.92	68	92	0.68	0.92	0.8	[]	takemurasa
takemurasa-connection_validation-508689623_PDM08og_pct	508689623	PDM08og_pct	Roughly traced	1361	5622	49	50	49	50	2	24	25	49	25	25	25	24	25	25	3	50	0.98	1	0.98	1	0.04			0.96	1	96	100	0.96	1	0.98	['False positive Tbar', 'Low confident PSD', 'Low confident PSD']	takemurasa
takemurasa-connection_validation-510269590_PDL06ox_pct	510269590	PDL06ox_pct	Roughly traced	216	802	48	50	45	49	0	22	23	45	25	25	25	22	25	23	1	50	0.96	1	0.9	0.98	0			0.88	0.92	88	92	0.88	0.92	0.9	['328861282 needs split']	takemurasa
rymert-connection_validation-510282921_ADL07og_pct	510282921	ADL07og_pct	Roughly traced	437	769	47	49	39	49	0	19	20	38	25	25	25	19	25	20	3	50	0.94	0.98	0.78	0.98	0			0.76	0.8	76	80	0.76	0.8	0.76	['HK', 'HK', 'HK']	rymert
ogundeyio-connection_validation-510317265_PDM30g_pct	510317265	PDM30g_pct	Roughly traced	767	1668	50	50	36	48	4	17	19	35	25	25	25	17	25	19	4	50	1	1	0.72	0.96	0.08			0.68	0.76	68	76	0.68	0.76	0.7	['False merge in psd segment merged to RT body', 'False merge on PSD', 'Slight segmentation errors in PSD', 'Low Confidence PSD']	ogundeyio
lohffa-connection_validation-510956083_PDL17g_pct	510956083	PDL17g_pct	Roughly traced	111	293	46	50	46	49	0	22	24	45	25	25	25	22	25	24	4	50	0.92	1	0.92	0.98	0			0.88	0.96	88	96	0.88	0.96	0.9	['T-bar is actually PSD', 'T-bar is actually PSD', 'T-bar is actually PSD', 'low confidence PSD placement']	lohffa
lohffa-connection_validation-511262952_ADL10b_pct	511262952	ADL10b_pct	Roughly traced	479	321	48	49	48	49	2	25	23	47	25	25	25	25	25	23	3	50	0.96	0.98	0.96	0.98	0.04			1	0.92	100	92	1	0.92	0.94	['low confidence PSD placement', 'PSD not valid?', 'This T-bar glyph is incorrect, but the connect is correct.']	lohffa
lohffa-connection_validation-511353266_put_PDM18e	511353266	PDM18e_pct	Roughly traced	179	564	50	49	48	48	2	24	24	45	25	25	25	24	25	24	6	50	1	0.98	0.96	0.96	0.04			0.96	0.96	96	96	0.96	0.96	0.9	['low confidence PSD placement', 'low confidence PSD placement', 'PSD not valid?', 'PSD not valid?', 'low confidence PSD placement', 'Multiple T-bars']	lohffa
lohffa-connection_validation-511358390_put_PDL10w	511358390	PDL10w_pct	Roughly traced	235	187	47	48	47	49	3	23	24	46	25	25	25	23	25	24	4	50	0.94	0.96	0.94	0.98	0.06			0.92	0.96	92	96	0.92	0.96	0.92	['PSD not valid?', 'low confidene PSD placement', 'PSD not valid?', 'T-bar and PSD not valid?']	lohffa
ogundeyio-connection_validation-512308235_PVL06p_a_pct	512308235	PVL06p_a_pct	Roughly traced	353	849	50	50	27	50	0	10	17	27	25	25	25	10	25	17	0	50	1	1	0.54	1	0			0.4	0.68	40	68	0.4	0.68	0.54	[]	ogundeyio
rymert-connection_validation-512774096_PVM12c_c_pct-complete	512774096	PVM12c_c_pct	Roughly traced	128	312	47	50	42	50	1	21	21	42	25	25	25	21	25	21	1	50	0.94	1	0.84	1	0.02			0.84	0.84	84	84	0.84	0.84	0.84	['HK']	rymert
ordishc-connection_validation-513339129_ADL14f_pct	513339129	ADL14f_pct	Roughly traced	152	307	47	50	34	50	0	15	19	34	25	25	25	15	25	19	0	50	0.94	1	0.68	1	0			0.6	0.76	60	76	0.6	0.76	0.68	[]	ordishc
rymert-connection_validation-513788774_FB6F	513788774	FB6F	Roughly traced	919	2155	50	50	46	48	1	24	22	45	25	25	25	24	25	22	3	50	1	1	0.92	0.96	0.02			0.96	0.88	96	88	0.96	0.88	0.9	['Unsure if T-bar', 'hotknife', 'hotknife']	rymert
lohffa-connection_validation-514043443_PDL15f_pct	514043443	PDL15f_pct	Roughly traced	471	1247	50	50	49	49	1	24	25	48	25	25	25	24	25	25	2	50	1	1	0.98	0.98	0.02			0.96	1	96	100	0.96	1	0.96	['PSD not valid?', 'low confidence PSD placement']	lohffa
smithc-connection_validation-514068564_PDM10oe_pct	514068564	PDM10oe_pct	Roughly traced	602	2109	48	50	38	50	2	22	16	38	25	25	25	22	25	16	2	50	0.96	1	0.76	1	0.04			0.88	0.64	88	64	0.88	0.64	0.76	['Not sure T-bar glyph is on a valid T-bar', 'Not sure T-bar glyph is on a valid T-bar']	smithc
ogundeyio-connection_validation-514396940_ADL13c_b_pct	514396940	ADL13u_pct	Roughly traced	130	145	48	50	37	50	1	22	15	37	25	25	25	22	25	15	1	50	0.96	1	0.74	1	0.02			0.88	0.6	88	60	0.88	0.6	0.74	['Low Confidence PSD']	ogundeyio
lohffa-connection_validation-514397189_put_ADL03ob	514397189	ADL03ob_pct	Roughly traced	194	375	48	50	47	50	1	25	22	47	25	25	25	25	25	22	3	50	0.96	1	0.94	1	0.02			1	0.88	100	88	1	0.88	0.94	['low confidence PSD placement. Multiple T-bars.', 'PSD not valid?', 'low confidence PSD placement']	lohffa
ogundeyio-connection_validation-515718803_ADL12k_a_pct	515718803	ADL12ok_pct	Roughly traced	261	511	49	50	34	50	0	19	15	34	25	25	25	19	25	15	0	50	0.98	1	0.68	1	0			0.76	0.6	76	60	0.76	0.6	0.68	[]	ogundeyio
lohffa-connection_validation-517838657_put_PDL06i	517838657	PDL06ow_pct	Roughly traced	250	761	49	49	47	49	3	25	22	47	25	25	25	25	25	22	4	50	0.98	0.98	0.94	0.98	0.06			1	0.88	100	88	1	0.88	0.94	['PSD not valid?', 'low confidence PSD placement', 'PSD affected by nearby T-bar', 'PSD not valid?']	lohffa
smithc-connection_validation-518920893_ADM04v_b_pct	518920893	ADM04v_b_pct	Roughly traced	42	369	49	50	41	50	0	17	24	41	25	25	25	17	25	24	1	50	0.98	1	0.82	1	0			0.68	0.96	68	96	0.68	0.96	0.82	['T-bar glyph is not on a valid T-bar']	smithc
lohffa-connection_validation-540972281_put_PDL06oi	540972281	PDL06oi_pct	Roughly traced	135	204	50	50	49	50	3	24	25	49	25	25	25	24	25	25	4	50	1	1	0.98	1	0.06			0.96	1	96	100	0.96	1	0.98	['PSD not valid?', 'PSD not valid?', 'PSD not valid?', 'low confidence PSD placement']	lohffa
takemurasa-connection_validation-540998783_PDL16ob_pct	540998783	PDL16ob_pct	Roughly traced	184	468	45	50	38	50	3	17	21	38	25	25	25	17	25	21	3	50	0.9	1	0.76	1	0.06			0.68	0.84	68	84	0.68	0.84	0.76	['Low confident PSD', 'Low confident PSD', 'Low confident PSD']	takemurasa
lohffa-connection_validation-541624179_ADL10m_a_pct	541624179	ADL10m_a_pct	Roughly traced	323	376	47	50	46	49	4	25	21	46	25	25	25	25	25	21	8	50	0.94	1	0.92	0.98	0.08			1	0.84	100	84	1	0.84	0.92	['low confidence PSD placement', 'low confidence PSD placement', 'low confidence PSD placement', 'T-bar and PSD not valid?', 'T-bar is actually PSD.', 'T-bar and PSD not valid?', 'PSD not valid?', 'PSD not valid?']	lohffa
lohffa-connection_validation-541723731_PDM24a_pct	541723731	PDM24a_pct	Roughly traced	311	1181	49	50	46	50	1	25	21	46	25	25	25	25	25	21	3	50	0.98	1	0.92	1	0.02			1	0.84	100	84	1	0.84	0.92	['PSD not valid?', 'low confidence PSD placement', 'low confidence PSD placement']	lohffa
lohffa-connection_validation-542665187_ADL04i_pct	542665187	ADL04i_pct	Roughly traced	151	204	48	49	48	50	0	25	23	48	25	25	25	25	25	23	2	50	0.96	0.98	0.96	1	0			1	0.92	100	92	1	0.92	0.96	['T-bar is actually PSD.', 'T-bar is actually PSD.']	lohffa
lohffa-connection_validation-542751938_PVM09g_pct	542751938	PVM09g_pct	Roughly traced	182	594	45	50	44	50	2	22	22	44	25	25	25	22	25	22	3	50	0.9	1	0.88	1	0.04			0.88	0.88	88	88	0.88	0.88	0.88	['low confidence PSD placement', 'PSD not valid?', 'PSD not valid?']	lohffa
lohffa-connection_validation-543365167_PDL07og_pct	543365167	PDL07og_pct	Roughly traced	86	491	46	49	45	50	2	23	22	45	25	25	25	23	25	22	3	50	0.92	0.98	0.9	1	0.04			0.92	0.88	92	88	0.92	0.88	0.9	['low confidence PSD placement', 'PSD not valid?', 'T-bar not valid?']	lohffa
lohffa-connection_validation-543766436_PDL12f_pct	543766436	PDL12f_pct	Roughly traced	400	834	47	50	47	50	3	25	22	47	25	25	25	25	25	22	6	50	0.94	1	0.94	1	0.06			1	0.88	100	88	1	0.88	0.94	['T-bar and PSD not valid?', 'T-bar and PSD not valid?', 'PSD not valid?', 'T-bar is actually PSD.', 'T-bar is actually PSD.', 'low confidence PSD placement']	lohffa
rymert-connection_validation-544037996_PDM06i_pct	544037996	PDM06i_pct	Roughly traced	424	1386	48	49	34	49	1	14	20	33	25	25	25	14	25	20	2	50	0.96	0.98	0.68	0.98	0.02			0.56	0.8	56	80	0.56	0.8	0.66	['HK', 'HK']	rymert
smithc-connection_validation-544046671_AVL04oa_pct	544046671	AVL04oa_pct	Roughly traced	910	850	47	50	39	48	1	21	18	37	25	25	25	21	25	18	3	50	0.94	1	0.78	0.96	0.02			0.84	0.72	84	72	0.84	0.72	0.74	['Not sure what body the T-bar glyph is supposed to be on', 'T-bar glyph is not on a valid T-bar', 'T-bar glyph is not on a valid T-bar']	smithc
lohffa-connection_validation-544158940_PDL05oe_pct	544158940	PDL05oe_pct	Roughly traced	432	1777	47	49	45	50	1	22	23	45	25	25	25	22	25	23	3	50	0.94	0.98	0.9	1	0.02			0.88	0.92	88	92	0.88	0.92	0.9	['Multiple T-bars. PSD affected by different T-bar. ', 'T-bar is actually PSD.', 'low confidence PSD placement']	lohffa
ogundeyio-connection_validation-546464512_ADL18q_pct	546464512	ADL18q_pct	Roughly traced	255	532	50	50	34	50	5	13	21	34	25	25	25	13	25	21	5	50	1	1	0.68	1	0.1			0.52	0.84	52	84	0.52	0.84	0.68	['Low Confidence PSD', 'Low Confidence psd', 'Low Confidence PSD', 'Low Confidence psd', 'Low Confidence psd']	ogundeyio
takemurasa-connection_validation-547103110_ADL14c_pct	547103110	ADL14c_pct	Roughly traced	200	509	50	50	44	50	0	21	23	44	25	25	25	21	25	23	0	50	1	1	0.88	1	0			0.84	0.92	84	92	0.84	0.92	0.88	[]	takemurasa
ogundeyio-connection_validation-547443555_ADL14d_pct	547443555	ADL14d_pct	Roughly traced	319	720	47	50	31	50	0	19	12	31	25	25	25	19	25	12	0	50	0.94	1	0.62	1	0			0.76	0.48	76	48	0.76	0.48	0.62	[]	ogundeyio
ogundeyio-connection_validation-547888586_PDL15n_pct	547888586	PDL15n_pct	Roughly traced	147	211	50	50	25	50	2	12	13	25	25	25	25	12	25	13	2	50	1	1	0.5	1	0.04			0.48	0.52	48	52	0.48	0.52	0.5	['Low Confidence PSD', 'Low Confidence PSD']	ogundeyio
takemurasa-connection_validation-548225503_ADL09y_pct	548225503	ADL09y_pct	Roughly traced	123	435	50	50	45	49	1	24	21	45	25	25	25	24	25	21	2	50	1	1	0.9	0.98	0.02			0.96	0.84	96	84	0.96	0.84	0.9	['Low confident PSD', 'Split todo placed']	takemurasa
rymert-connection_validation-549175510_ADL02w_pct	549175510	ADL02w_pct	Roughly traced	949	2937	48	50	43	50	1	23	20	43	25	25	25	23	25	20	1	50	0.96	1	0.86	1	0.02			0.92	0.8	92	80	0.92	0.8	0.86	['Synapse on HK']	rymert
lohffa-connection_validation-549722579_ADM10b_pct	549722579	CL-Sm(c)	Roughly traced	1785	8438	49	49	48	50	0	25	23	47	25	25	25	25	25	23	1	50	0.98	0.98	0.96	1	0			1	0.92	100	92	1	0.92	0.94	['PSD affected by different T-bar. ']	lohffa
ogundeyio-connection_validation-551341782_ADM01i_c_pct	551341782	ADM01li_pct	Roughly traced	170	577	48	50	33	50	0	17	16	33	25	25	25	17	25	16	0	50	0.96	1	0.66	1	0			0.68	0.64	68	64	0.68	0.64	0.66	[]	ogundeyio
ordishc-connection_validation-551790913_PAM04	551790913	PAM04_a	Roughly traced	457	2194	50	50	41	50	0	19	22	41	25	25	25	19	25	22	0	50	1	1	0.82	1	0			0.76	0.88	76	88	0.76	0.88	0.82	[]	ordishc
rymert-connection_validation-573005505_PDL22d_pct	573005505	PDL22d_pct	Roughly traced	199	188	50	50	40	49	1	23	17	39	25	25	25	23	25	17	1	50	1	1	0.8	0.98	0.02			0.92	0.68	92	68	0.92	0.68	0.78	['crease in EM']	rymert
lohffa-connection_validation-573328325_ADL15e_pct	573328325	ADL15e_pct	Roughly traced	157	313	49	50	49	50	2	25	24	49	25	25	25	25	25	24	2	50	0.98	1	0.98	1	0.04			1	0.96	100	96	1	0.96	0.98	['PSD not valid?', 'T-bar and PSD not valid?']	lohffa
lohffa-connection_validation-574041014_AVL18e_pct	574041014	AVL18e_pct	Roughly traced	247	437	45	50	45	50	1	20	25	45	25	25	25	20	25	25	5	50	0.9	1	0.9	1	0.02			0.8	1	80	100	0.8	1	0.9	['low confidence PSD placement', 'T-bar is actually PSD', 'T-bar is actually PSD', 'T-bar is actually PSD', 'T-bar and PSD not valid?']	lohffa
rymert-connection_validation-574736017_PVL11ob_pct	574736017	PVL11ob_pct	Roughly traced	1120	2929	49	50	44	50	0	23	21	44	25	25	25	23	25	21	0	50	0.98	1	0.88	1	0			0.92	0.84	92	84	0.92	0.84	0.88	[]	rymert
lohffa-connection_validation-575073147_AVL06oc_pct	575073147	AVL06oc_pct	Roughly traced	260	1044	49	50	48	50	3	23	25	48	25	25	25	23	25	25	4	50	0.98	1	0.96	1	0.06			0.92	1	92	100	0.92	1	0.96	['low confidence PSD placement', 'T-bar and PSD not valid?', 'Multiple T-bars. PSD affected by nearby T-bar. ', 'PSD not valid?']	lohffa
rymert-connection_validation-575197482_PDM09on_pct	575197482	PDM09on_pct	Roughly traced	562	1390	49	49	37	49	1	18	19	35	25	25	25	18	25	19	2	50	0.98	0.98	0.74	0.98	0.02			0.72	0.76	72	76	0.72	0.76	0.7	['Unsure if PSD in cleft', 'HK']	rymert
takemurasa-connection_validation-575806223_ADL03k_c_pct	575806223	ADL03k_c_pct	Roughly traced	201	343	46	50	41	49	2	19	22	40	25	25	25	19	25	22	3	50	0.92	1	0.82	0.98	0.04			0.76	0.88	76	88	0.76	0.88	0.8	['514068564 need a split', 'Low confident PSD', 'Low confident PSD']	takemurasa
takemurasa-connection_validation-576566621_PDM13i_pct	576566621	PDM13i_pct	Roughly traced	711	2358	48	49	44	49	2	21	23	44	25	25	25	21	25	23	4	50	0.96	0.98	0.88	0.98	0.04			0.84	0.92	84	92	0.84	0.92	0.88	['False positive Tbar', 'Low confident PSD', 'False positive Tbar', 'Low confident PSD']	takemurasa
lohffa-connection_validation-576821609_put_ADL18p	576821609	ADL18w_pct	Roughly traced	271	508	49	50	49	49	0	25	24	48	25	25	25	25	25	24	4	50	0.98	1	0.98	0.98	0			1	0.96	100	96	1	0.96	0.96	['PSD not valid?', 'Low confidence PSD placement', 'T-bar is actually PSD', 'low confidence PSD placement']	lohffa
rymert-connection_validation-578474907_AVL02b_a_pct	578474907	AVL02b_pct	Roughly traced	204	331	49	50	43	50	1	20	23	43	25	25	25	20	25	23	1	50	0.98	1	0.86	1	0.02			0.8	0.92	80	92	0.8	0.92	0.86	['HK']	rymert
ogundeyio-connection_validation-578893446_ADL14b_pct	578893446	ADL14b_pct	Roughly traced	254	1075	50	50	40	50	1	20	20	40	25	25	25	20	25	20	1	50	1	1	0.8	1	0.02			0.8	0.8	80	80	0.8	0.8	0.8	['Low Confidence PSD']	ogundeyio
takemurasa-connection_validation-579239039_ADL09k_pct	579239039	ADL09k_pct	Roughly traced	122	502	49	50	44	50	1	22	22	44	25	25	25	22	25	22	1	50	0.98	1	0.88	1	0.02			0.88	0.88	88	88	0.88	0.88	0.88	['Low confident PSD']	takemurasa
ogundeyio-connection_validation-579268807_FB1C	579268807	FB1C	Traced	1356	3273	49	50	39	50	1	21	18	39	25	25	25	21	25	18	2	50	0.98	1	0.78	1	0.02			0.84	0.72	84	72	0.84	0.72	0.78	['Low Confidence PSD', 'Very Low Confidence Tbar']	ogundeyio
knechtc-connection_validation-580192148_put_PDM20a	580192148	PDM20a_pct	Roughly traced	121	261	49	49	47	49	0	23	24	47	25	25	25	23	25	24	0	50	0.98	0.98	0.94	0.98	0			0.92	0.96	92	96	0.92	0.96	0.94	[]	knechtc
lohffa-connection_validation-580231908_ADL19i_a_pct	580231908	ADL19i_pct	Roughly traced	148	243	50	50	49	50	0	25	24	49	25	25	25	25	25	24	0	50	1	1	0.98	1	0			1	0.96	100	96	1	0.96	0.98	[]	lohffa
takemurasa-connection_validation-580244242_ADL17m_a_pct	580244242	ADL17m_a_pct	Roughly traced	159	299	47	50	41	50	1	22	19	41	25	25	25	22	25	19	1	50	0.94	1	0.82	1	0.02			0.88	0.76	88	76	0.88	0.76	0.82	['Low confident PSD']	takemurasa
lohffa-connection_validation-581004609_PDM12q_pct	581004609	PDM12q_pct	Roughly traced	469	1523	49	50	47	50	4	25	22	47	25	25	25	25	25	22	7	50	0.98	1	0.94	1	0.08			1	0.88	100	88	1	0.88	0.94	['low confidence PSD placement', 'PSD not valid?', 'low confidence PSD placement', 'PSD not valid?', 'PSD not valid?', 'PSD not valid?', 'low confidence PSD placement']	lohffa
ogundeyio-connection_validation-581336531_ADM02b_pct	581336531	ADM02b_pct	Roughly traced	474	1760	50	50	29	50	1	12	17	29	25	25	25	12	25	17	1	50	1	1	0.58	1	0.02			0.48	0.68	48	68	0.48	0.68	0.58	['Low Confidence PSD']	ogundeyio
takemurasa-connection_validation-582696254_ADL03u_pct	582696254	ADL03u_pct	Roughly traced	295	395	48	50	40	49	0	22	18	40	25	25	25	22	25	18	3	50	0.96	1	0.8	0.98	0			0.88	0.72	88	72	0.88	0.72	0.8	['Split todo placed', 'False positive Tbar', 'False positive Tbar']	takemurasa
ogundeyio-connection_validation-602476655_PDM08of_pct	602476655	PDM08of_pct	Roughly traced	695	2770	44	50	26	50	1	12	14	26	25	25	25	12	25	14	1	50	0.88	1	0.52	1	0.02			0.48	0.56	48	56	0.48	0.56	0.52	['Low Confidence PSD']	ogundeyio
lohffa-connection_validation-603444300_AVL12k_pct	603444300	AVL12k_pct	Roughly traced	510	702	49	49	48	49	3	24	24	48	25	25	25	24	25	24	5	50	0.98	0.98	0.96	0.98	0.06			0.96	0.96	96	96	0.96	0.96	0.96	['Multiple T-bars.', 'PSD not valid?', 'low confidence PSD placement', 'PSD not valid?', 'PSD not valid?']	lohffa
lohffa-connection_validation-603751637_AVL12u_pct	603751637	AVL12u_pct	Roughly traced	378	606	46	50	45	50	1	22	23	45	25	25	25	22	25	23	4	50	0.92	1	0.9	1	0.02			0.88	0.92	88	92	0.88	0.92	0.9	['T-bar glyph placed very poorly.', 'T-bar and PSD not valid?', 'low confidence PSD placement', 'T-bar is actually PSD.']	lohffa
lohffa-connection_validation-604769716_PDL11x_pct	604769716	PDL11x_pct	Roughly traced	67	191	49	50	49	50	3	25	24	49	25	25	25	25	25	24	5	50	0.98	1	0.98	1	0.06			1	0.96	100	96	1	0.96	0.98	['Multiple T-bars. PSD affected by nearby T-bar.', 'PSD not valid?', 'low confidence PSD placement', 'low confidence PSD placement', 'PSD not valid?']	lohffa
ogundeyio-connection_validation-605090489_ADL10g_c_pct	605090489	ADL10g_c_pct	Roughly traced	149	185	49	50	41	49	2	23	18	40	25	25	25	23	25	18	2	50	0.98	1	0.82	0.98	0.04			0.92	0.72	92	72	0.92	0.72	0.8	['False merges in PSD', 'Low Confidence PSd']	ogundeyio
ordishc-connection_validation-605391864_PVL03p_pct	605391864	PVL03p_pct	Roughly traced	162	449	48	50	40	47	0	23	17	37	25	25	25	23	25	17	0	50	0.96	1	0.8	0.94	0			0.92	0.68	92	68	0.92	0.68	0.74	[]	ordishc
ogundeyio-connection_validation-605554875_PDM18f_pct	605554875	PDM18f_pct	Roughly traced	392	2163	49	50	42	49	2	17	25	42	25	25	25	17	25	25	3	50	0.98	1	0.84	0.98	0.04			0.68	1	68	100	0.68	1	0.84	['Low Confidence PSD', 'False merge on PSD segment joining it to a RT body that is not connected', 'False merge on PSD segment joining it to a RT body that is not connected']	ogundeyio
lohffa-connection_validation-607130326_ADL04m_pct	607130326	ADL04m_pct	Roughly traced	170	256	50	50	49	49	4	24	25	48	25	25	25	24	25	25	5	50	1	1	0.98	0.98	0.08			0.96	1	96	100	0.96	1	0.96	['PSD not valid?', 'low confidence PSD placement', 'PSD not valid?', 'PSD not valid?', 'T-bar and PSD not valid?']	lohffa
takemurasa-connection_validation-607273128_PDM06j_a_pct	607273128	PDM06oa_pct	Roughly traced	276	1393	46	50	35	49	0	19	16	34	25	25	25	19	25	16	3	50	0.92	1	0.7	0.98	0			0.76	0.64	76	64	0.76	0.64	0.68	['False positive Tbar', 'False positive Tbar', 'False positive Tbar']	takemurasa
ogundeyio-connection_validation-607597135_ADM10x_pct	607597135	ADM10x_pct	Roughly traced	1901	3179	48	50	35	50	0	19	16	35	25	25	25	19	25	16	0	50	0.96	1	0.7	1	0			0.76	0.64	76	64	0.76	0.64	0.7	[]	ogundeyio
rymert-connection_validation-608546564_ADL22e_pct	608546564	ADL22e_pct	Roughly traced	172	354	50	50	42	50	0	22	20	42	25	25	25	22	25	20	0	50	1	1	0.84	1	0			0.88	0.8	88	80	0.88	0.8	0.84	[]	rymert
lohffa-connection_validation-608891515_PDL11y_pct	608891515	PDL11og_pct	Roughly traced	117	429	48	49	47	50	3	24	23	47	25	25	25	24	25	23	5	50	0.96	0.98	0.94	1	0.06			0.96	0.92	96	92	0.96	0.92	0.94	['PSD not valid?', 'low confidence PSD placement', 'low confidence PSD placement', 'T-bar and PSD not valid?', 'PSD not valid?']	lohffa
ordishc-connection_validation-609168709_ADL04q_e_pct	609168709	ADL04q_e_pct	Roughly traced	251	429	50	50	42	49	0	21	21	42	25	25	25	21	25	21	0	50	1	1	0.84	0.98	0			0.84	0.84	84	84	0.84	0.84	0.84	[]	ordishc
smithc-connection_validation-609233083_ADL19olb_pct	609233083	ADL19oa_pct	Roughly traced	131	601	50	50	39	49	0	19	20	38	25	25	25	19	25	20	0	50	1	1	0.78	0.98	0			0.76	0.8	76	80	0.76	0.8	0.76	[]	smithc
ogundeyio-connection_validation-609867847_AVM15c_pct	609867847	AVM15c_pct	Roughly traced	131	224	49	50	35	50	0	19	16	35	25	25	25	19	25	16	0	50	0.98	1	0.7	1	0			0.76	0.64	76	64	0.76	0.64	0.7	[]	ogundeyio
rymert-connection_validation-612742165_ADM07v_b_pct	612742165	ADM07v_b_pct	Roughly traced	276	844	50	50	41	50	0	19	22	41	25	25	25	19	25	22	0	50	1	1	0.82	1	0			0.76	0.88	76	88	0.76	0.88	0.82	[]	rymert
rymert-connection_validation-613040803_AVL05a_pct	613040803	AVL05a_pct	Roughly traced	737	1747	48	50	38	50	0	18	20	38	25	25	25	18	25	20	0	50	0.96	1	0.76	1	0			0.72	0.8	72	80	0.72	0.8	0.76	[]	rymert
ogundeyio-connection_validation-613083298_ADM07d_a_pct	613083298	ADM07d_a_pct	Roughly traced	220	1071	49	50	34	50	4	15	19	34	25	25	25	15	25	19	4	50	0.98	1	0.68	1	0.08			0.6	0.76	60	76	0.6	0.76	0.68	['Low Confidence PSD', 'Low Confidence PSD', 'Low Confidence PSD', 'Low Confidence PSD']	ogundeyio
smithc-connection_validation-613338546_PDL05u_pct	613338546	PDL05u_pct	Roughly traced	202	804	49	50	39	48	1	22	17	37	25	25	25	22	25	17	1	50	0.98	1	0.78	0.96	0.02			0.88	0.68	88	68	0.88	0.68	0.74	['Not sure T-bar glyph is on a valid T-bar']	smithc
ogundeyio-connection_validation-613394707_PVL04om_pct	613394707	PVL04om_pct	Roughly traced	432	1087	49	50	31	50	2	13	18	31	25	25	25	13	25	18	3	50	0.98	1	0.62	1	0.04			0.52	0.72	52	72	0.52	0.72	0.62	['Low Confidence PSD', 'Low Confidence PSD', 'Low Confidence PSD']	ogundeyio
ogundeyio-connection_validation-614413183_PVL04w_pct	614413183	PVL04w_pct	Roughly traced	72	241	50	50	30	50	1	16	14	30	25	25	25	16	25	14	1	50	1	1	0.6	1	0.02			0.64	0.56	64	56	0.64	0.56	0.6	['Low Confidence PSD']	ogundeyio
ogundeyio-connection_validation-632570417_PDM17od_pct	632570417	PDM17od_pct	Roughly traced	408	2162	48	50	38	50	0	16	22	38	25	25	25	16	25	22	0	50	0.96	1	0.76	1	0			0.64	0.88	64	88	0.64	0.88	0.76	[]	ogundeyio
ogundeyio-connection_validation-633895972_PFNm_b	633895972	PFNm_b	Roughly traced	131	542	49	50	34	50	2	15	19	34	25	25	25	15	25	19	2	50	0.98	1	0.68	1	0.04			0.6	0.76	60	76	0.6	0.76	0.68	['Low Confidence PSD', 'Low Confidence PSD']	ogundeyio
lohffa-connection_validation-634029702_PDL08ol_pct	634029702	PDL08ol_pct	Roughly traced	152	228	49	49	48	49	2	25	23	48	25	25	25	25	25	23	6	50	0.98	0.98	0.96	0.98	0.04			1	0.92	100	92	1	0.92	0.96	['low confidence PSD placement', 'T-bar and PSD not valid?', 'low confidence PSD placement', 'T-bar and PSD not valid? T-bar possibly PSD.', 'low confidence PSD Placement', 'T-bar and PSD are same body']	lohffa
ogundeyio-connection_validation-634884062_PDM12z_pct	634884062	PDM12z_pct	Roughly traced	158	614	50	50	34	50	2	16	18	34	25	25	25	16	25	18	2	50	1	1	0.68	1	0.04			0.64	0.72	64	72	0.64	0.72	0.68	['Low Confidence PSD', 'Low Confidence PSD']	ogundeyio
smithc-connection_validation-635501884_AVL06of_pct	635501884	AVL06of_pct	Roughly traced	451	817	46	50	39	50	3	20	19	39	25	25	25	20	25	19	4	50	0.92	1	0.78	1	0.06			0.8	0.76	80	76	0.8	0.76	0.78	['T-bar glyph is on a PSD', 'Not sure T-bar glyph is on a valid T-bar', 'T-bar glyph seems to be on a PSD', 'Not sure T-bar glyph is on a valid T-bar']	smithc
rymert-connection_validation-635890732_PVL04or_pct	635890732	PVL04or_pct	Roughly traced	163	410	49	50	44	49	0	23	21	43	25	25	25	23	25	21	0	50	0.98	1	0.88	0.98	0			0.92	0.84	92	84	0.92	0.84	0.86	[]	rymert
rymert-connection_validation-637949421_PDM11i_pct	637949421	PDM11ou_pct	Roughly traced	199	698	45	49	41	48	2	21	20	41	26	24	26	21	24	20	3	50	0.9	0.98	0.82	0.96	0.04			0.807692308	0.833333333	80.76923077	83.33333333	0.807692308	0.833333333	0.82	['Unsure if T-bar', 'hotknife', 'PSD cell needs MED split']	rymert
lohffa-connection_validation-638196102_put_ADL04g	638196102	ADL04g_pct	Roughly traced	966	1538	50	50	46	50	4	25	21	46	25	25	25	25	25	21	6	50	1	1	0.92	1	0.08			1	0.84	100	84	1	0.84	0.92	['Multiple T-bars. PSD affected by nearby T-bar. ', 'PSD not valid?', 'PSD not valid?', 'low confidence PSD Placement', 'T-bar and PSD not valid?', 'low confidence PSD placement']	lohffa
takemurasa-connection_validation-638829946_PVL04x_pct	638829946	PVL04x_pct	Roughly traced	683	3428	50	50	41	49	0	19	22	41	25	25	25	19	25	22	1	50	1	1	0.82	0.98	0			0.76	0.88	76	88	0.76	0.88	0.82	['Split todo placed']	takemurasa
rymert-connection_validation-639995972_PDM09u_pct	639995972	PDM09u_pct	Roughly traced	563	2373	50	50	43	49	1	18	25	42	25	25	25	18	25	25	1	50	1	1	0.86	0.98	0.02			0.72	1	72	100	0.72	1	0.84	['Unsure if T-bar']	rymert
ogundeyio-connection_validation-640281116_PDL06oh_pct	640281116	PDL06oh_pct	Roughly traced	144	328	50	50	34	47	4	19	15	32	25	25	25	19	25	15	4	50	1	1	0.68	0.94	0.08			0.76	0.6	76	60	0.76	0.6	0.64	['False merge that adds small PSD to another RT body', 'Low Confidence PSD', 'Low Confidence PSD', 'False Merge of small PSD to RT body']	ogundeyio
lohffa-connection_validation-640596169_put_PDM10d	640596169	PDM10d_pct	Roughly traced	269	1079	50	50	49	50	2	25	24	49	25	25	25	25	25	24	5	50	1	1	0.98	1	0.04			1	0.96	100	96	1	0.96	0.98	['low confidence PSD placement', 'low confidence PSD placement', 'PSD not valid?', 'low confidence PSD placement', 'PSD not valid?']	lohffa
lohffa-connection_validation-641126853_put_ADM07od	641126853	ADM07od_pct	Roughly traced	221	846	50	50	49	50	3	25	24	49	25	25	25	25	25	24	5	50	1	1	0.98	1	0.06			1	0.96	100	96	1	0.96	0.98	['low confidence PSD placement', 'PSD not valid?', 'Multiple T-bars. PSD affected by nearby T-bar.', 'PSD not valid?', 'low confidence PSD placement']	lohffa
takemurasa-connection_validation-642723975_AVM15f_pct	642723975	AVM15r_pct	Roughly traced	958	1219	50	50	45	50	1	24	21	45	25	25	25	24	25	21	1	50	1	1	0.9	1	0.02			0.96	0.84	96	84	0.96	0.84	0.9	['Low confident Tbar']	takemurasa
ogundeyio-connection_validation-643393688_PDM09g_pct	643393688	PDM09g_pct	Roughly traced	1999	16313	48	50	31	50	4	12	19	31	25	25	25	12	25	19	4	50	0.96	1	0.62	1	0.08			0.48	0.76	48	76	0.48	0.76	0.62	['Low Confidence PSD', 'Low Confidence PSD', 'Low Confidence PSD', 'Low Confidence PSD']	ogundeyio
ogundeyio-connection_validation-643760681_ADM07of_pct	643760681	ADM07of_pct	Roughly traced	237	1066	49	50	41	49	1	18	23	40	25	25	25	18	25	23	1	50	0.98	1	0.82	0.98	0.02			0.72	0.92	72	92	0.72	0.92	0.8	['False merge in PSD that connects the actual PSD to a RT body ']	ogundeyio
lohffa-connection_validation-643794320_ADM07v_a_pct	643794320	ADM07v_a_pct	Roughly traced	344	1039	50	50	49	50	2	25	24	49	25	25	25	25	25	24	6	50	1	1	0.98	1	0.04			1	0.96	100	96	1	0.96	0.98	['low confidence PSD placement', 'PSD not valid?', 'low confidence PSD placement', 'low confidence PSD placement', 'low confidence PSD placement', 'PSD not valid?']	lohffa
smithc-connection_validation-644425543_ADM01s_pct	644425543	ADM01s_pct	Roughly traced	502	2112	50	50	39	50	1	20	19	39	25	25	25	20	25	19	1	50	1	1	0.78	1	0.02			0.8	0.76	80	76	0.8	0.76	0.78	['Not sure if this PSD belongs to this T-bar']	smithc
takemurasa-connection_validation-644455046_ADM01y_b_pct	644455046	ADM01lb_pct	Roughly traced	319	891	48	50	44	50	1	23	21	44	25	25	25	23	25	21	3	50	0.96	1	0.88	1	0.02			0.92	0.84	92	84	0.92	0.84	0.88	['False positive Tbar', 'False positive Tbar', 'Low confident PSD']	takemurasa
takemurasa-connection_validation-645449236_PVL08ola_pct	645449236	PVL08ola_pct	Traced	214	675	49	50	46	49	1	23	23	46	25	25	25	23	25	23	2	50	0.98	1	0.92	0.98	0.02			0.92	0.92	92	92	0.92	0.92	0.92	['7112616355 needs a split', 'Low confident Tbar']	takemurasa
smithc-connection_validation-665479890_ADL29a_pct	665479890	ADL29f_pct	Roughly traced	533	1267	48	50	41	49	1	21	20	40	25	25	25	21	25	20	2	50	0.96	1	0.82	0.98	0.02			0.84	0.8	84	80	0.84	0.8	0.8	['T-bar glyph is not on a valid T-bar', 'Not sure T-bar glyph is on a valid T-bar']	smithc
takemurasa-connection_validation-666450841_PDL08n_pct	666450841	PDL08n_pct	Roughly traced	485	1118	50	50	47	50	1	22	25	47	25	25	25	22	25	25	1	50	1	1	0.94	1	0.02			0.88	1	88	100	0.88	1	0.94	['Low confident PSD']	takemurasa
takemurasa-connection_validation-666503184_ADL07g_pct	666503184	ADL07g_pct	Roughly traced	209	516	47	50	43	50	0	21	22	43	25	25	25	21	25	22	0	50	0.94	1	0.86	1	0			0.84	0.88	84	88	0.84	0.88	0.86	[]	takemurasa
ogundeyio-connection_validation-666818214_AVM15d_c_pct	666818214	AVM15d_pct	Roughly traced	100	136	46	50	31	50	0	14	17	31	25	25	25	14	25	17	0	50	0.92	1	0.62	1	0			0.56	0.68	56	68	0.56	0.68	0.62	[]	ogundeyio
lohffa-connection_validation-667486204_PDL08or_pct	667486204	PDL08or_pct	Roughly traced	460	1108	48	49	46	49	1	21	25	46	25	25	25	21	25	25	1	50	0.96	0.98	0.92	0.98	0.02			0.84	1	84	100	0.84	1	0.92	['PSD not valid?']	lohffa
rymert-connection_validation-668497214_AVL07ox_pct	668497214	AVL07ox_pct	Roughly traced	169	293	50	50	38	49	0	20	18	37	25	25	25	20	25	18	0	50	1	1	0.76	0.98	0			0.8	0.72	80	72	0.8	0.72	0.74	[]	rymert
smithc-connection_validation-668552668_ADL04oj_pct	668552668	ADL04oj_pct	Roughly traced	944	1219	50	50	41	49	0	20	21	40	25	25	25	20	25	21	0	50	1	1	0.82	0.98	0			0.8	0.84	80	84	0.8	0.84	0.8	[]	smithc
ordishc-connection_validation-668716892_FB8B	668716892	FB8B	Roughly traced	298	1008	46	50	41	50	0	22	19	41	25	25	25	22	25	19	0	50	0.92	1	0.82	1	0			0.88	0.76	88	76	0.88	0.76	0.82	[]	ordishc
lohffa-connection_validation-669856713_put_AVL11a	669856713	AVL11a_pct	Roughly traced	1311	1348	49	50	49	49	4	25	24	48	25	25	25	25	25	24	7	50	0.98	1	0.98	0.98	0.08			1	0.96	100	96	1	0.96	0.96	['PSD not valid?', 'low confidence PSD placement', 'PSD not valid?', 'PSD not valid?', 'low confidence PSD placement', 'PSD not valid?', 'low confidence PSD placement']	lohffa
lohffa-connection_validation-670219670_put_ADL12r	670219670	ADL12r_pct	Roughly traced	217	607	48	50	48	50	2	25	23	48	25	25	25	25	25	23	4	50	0.96	1	0.96	1	0.04			1	0.92	100	92	1	0.92	0.96	['PSD not valid?', 'low confidence PSD placement', 'low confidence PSD placement', 'T-bar and PSD not valid']	lohffa
takemurasa-connection_validation-670435003_PDM17om_pct	670435003	PDM17e_pct	Roughly traced	648	1764	49	50	45	49	2	22	23	45	26	24	26	22	24	23	3	50	0.98	1	0.9	0.98	0.04			0.846153846	0.958333333	84.61538462	95.83333333	0.846153846	0.958333333	0.9	['Low confident Tbar and PSD', '670435003 needs a split', 'Low confident Tbar and PSD']	takemurasa
rymert-connection_validation-671342033_PDM16n_pct	671342033	PDM16n_pct	Roughly traced	286	679	49	50	42	50	0	21	21	42	25	25	25	21	25	21	0	50	0.98	1	0.84	1	0			0.84	0.84	84	84	0.84	0.84	0.84	[]	rymert
ordishc-connection_validation-672283773_AVL25b_pct	672283773	AVL25b_pct	Roughly traced	1111	4238	47	50	36	50	0	18	18	36	25	25	25	18	25	18	0	50	0.94	1	0.72	1	0			0.72	0.72	72	72	0.72	0.72	0.72	[]	ordishc
lohffa-connection_validation-672960748_ADL16i_pct	672960748	ADL16i_pct	Roughly traced	474	967	48	50	47	50	1	22	25	47	25	25	25	22	25	25	3	50	0.96	1	0.94	1	0.02			0.88	1	88	100	0.88	1	0.94	['T-bar is actually PSD.', 'low confidence PSD placement', 'PSD not valid?']	lohffa
rymert-connection_validation-674100160_AVM07f_pct	674100160	AVM07f_pct	Traced	222	1145	50	50	45	50	1	21	24	45	25	25	25	21	25	24	1	50	1	1	0.9	1	0.02			0.84	0.96	84	96	0.84	0.96	0.9	['PSD on edge']	rymert
lohffa-connection_validation-676479156_aIPg2	676479156	aIPg2	Roughly traced	356	802	50	50	47	49	1	24	23	46	25	25	25	24	25	23	3	50	1	1	0.94	0.98	0.02			0.96	0.92	96	92	0.96	0.92	0.92	['PSD not valid?', 'low confidence PSD placement', 'low confidence PSD placement']	lohffa
rymert-connection_validation-698194389_PVL03os_pct	698194389	PVL03os_pct	Roughly traced	221	520	49	50	44	49	1	21	23	43	25	25	25	21	25	23	1	50	0.98	1	0.88	0.98	0.02			0.84	0.92	84	92	0.84	0.92	0.86	['HK']	rymert
smithc-connection_validation-698846779_PDL08ob_pct	698846779	PDL08ob_pct	Roughly traced	173	296	48	49	41	49	2	23	18	39	25	25	25	23	25	18	2	50	0.96	0.98	0.82	0.98	0.04			0.92	0.72	92	72	0.92	0.72	0.78	['Not sure T-bar glyph is on a valid T-bar', 'Not sure T-bar glyph is on a valid T-bar']	smithc
takemurasa-connection_validation-698888718_AVL02b_b_pct	698888718	AVL02le_pct	Roughly traced	181	340	49	50	35	50	1	16	19	35	25	25	25	16	25	19	2	50	0.98	1	0.7	1	0.02			0.64	0.76	64	76	0.64	0.76	0.7	['Low confident Tbar and PSD', 'Low confident PSD']	takemurasa
ordishc-connection_validation-698979607_ADL29b_pct	698979607	ADL29b_pct	Roughly traced	277	566	47	50	35	50	0	20	15	35	25	25	25	20	25	15	0	50	0.94	1	0.7	1	0			0.8	0.6	80	60	0.8	0.6	0.7	[]	ordishc
takemurasa-connection_validation-699515201_PDL08oj_pct	699515201	PDL08oj_pct	Roughly traced	184	578	50	50	41	50	0	22	19	41	25	25	25	22	25	19	1	50	1	1	0.82	1	0			0.88	0.76	88	76	0.88	0.76	0.82	['Tbar placed on 1099912101']	takemurasa
rymert-connection_validation-699894933_ADL01oi_pct	699894933	ADL01oi_pct	Roughly traced	70	170	49	50	40	48	0	20	20	38	25	25	25	20	25	20	0	50	0.98	1	0.8	0.96	0			0.8	0.8	80	80	0.8	0.8	0.76	[]	rymert
smithc-connection_validation-700037217_PDM09of_pct	700037217	PDM09ow_pct	Roughly traced	229	689	48	49	34	49	1	18	16	34	25	25	25	18	25	16	2	50	0.96	0.98	0.68	0.98	0.02			0.72	0.64	72	64	0.72	0.64	0.68	['T-bar glyph is not on a valid T-bar', 'Not sure T-bar glyph is on a valid T-bar, hotknife stitch obscures synapse']	smithc
takemurasa-connection_validation-701923413_AVM18d_pct	701923413	AVM18d_pct	Roughly traced	2615	3698	48	50	47	50	2	25	22	47	25	25	25	25	25	22	2	50	0.96	1	0.94	1	0.04			1	0.88	100	88	1	0.88	0.94	['Low confident PSD', 'Low confident PSD']	takemurasa
rymert-connection_validation-702674134_ADL13j_pct	702674134	ADL13j_pct	Roughly traced	92	256	47	50	40	49	0	20	20	40	25	25	25	20	25	20	0	50	0.94	1	0.8	0.98	0			0.8	0.8	80	80	0.8	0.8	0.8	[]	rymert
rymert-connection_validation-704078253_PDL06n_a_pct	704078253	PDL06n_a_pct	Roughly traced	135	818	50	50	46	49	1	23	23	46	25	25	25	23	25	23	1	50	1	1	0.92	0.98	0.02			0.92	0.92	92	92	0.92	0.92	0.92	['Unsure if PSD in cleft']	rymert
rymert-connection_validation-704233784_FB2C	704233784	FB2C	Roughly traced	307	1251	50	50	45	50	0	22	23	45	25	25	25	22	25	23	0	50	1	1	0.9	1	0			0.88	0.92	88	92	0.88	0.92	0.9	[]	rymert
takemurasa-connection_validation-705471952_ADM05r_pct	705471952	ADM05r_pct	Roughly traced	453	1969	50	50	42	49	0	24	18	42	25	25	25	24	25	18	0	50	1	1	0.84	0.98	0			0.96	0.72	96	72	0.96	0.72	0.84	[]	takemurasa
ogundeyio-connection_validation-705554385_PDM22k_pct	705554385	PDM22k_pct	Roughly traced	183	313	48	50	38	50	3	20	18	38	25	25	25	20	25	18	3	50	0.96	1	0.76	1	0.06			0.8	0.72	80	72	0.8	0.72	0.76	['Low Confidence PSD', 'Low Confidence PSD', 'Low Confidence PSD']	ogundeyio
takemurasa-connection_validation-707854620_PVL04oh_pct	707854620	PVL04oh_pct	Roughly traced	276	538	49	50	47	50	2	24	23	47	25	25	25	24	25	23	3	50	0.98	1	0.94	1	0.04			0.96	0.92	96	92	0.96	0.92	0.94	['Low confident Tbar', 'False positive Tbar', 'Low confident PSD']	takemurasa
rymert-connection_validation-727276708_PDM33c_pct	727276708	PDM33c_pct	Roughly traced	409	1220	49	50	43	49	0	23	20	42	25	25	25	23	25	20	0	50	0.98	1	0.86	0.98	0			0.92	0.8	92	80	0.92	0.8	0.84	[]	rymert
takemurasa-connection_validation-728666990_PDM17r_pct	728666990	PDM17r_pct	Roughly traced	226	742	46	50	39	50	1	19	20	39	25	25	25	19	25	20	4	50	0.92	1	0.78	1	0.02			0.76	0.8	76	80	0.76	0.8	0.78	['False positive Tbar', 'False positive Tbar', 'Tbar should be on 326253554', 'Low confident PSD']	takemurasa
smithc-connection_validation-729358056_PDM09i_pct	729358056	PDM09ot_pct	Roughly traced	530	1516	49	50	40	50	0	19	21	40	25	25	25	19	25	21	1	50	0.98	1	0.8	1	0			0.76	0.84	76	84	0.76	0.84	0.8	['T-bar glyph is on a PSD']	smithc
ogundeyio-connection_validation-729535036_PVL03ou_pct	729535036	PVL03ou_pct	Roughly traced	65	130	47	50	30	50	0	18	12	30	25	25	25	18	25	12	0	50	0.94	1	0.6	1	0			0.72	0.48	72	48	0.72	0.48	0.6	[]	ogundeyio
ogundeyio-connection_validation-730537677_ADL05q_e_pct	730537677	ADL05q_e_pct	Roughly traced	367	905	50	50	43	50	1	22	21	43	25	25	25	22	25	21	1	50	1	1	0.86	1	0.02			0.88	0.84	88	84	0.88	0.84	0.86	['Low Confidence PSD']	ogundeyio
lohffa-connection_validation-731689147_PDL06or_pct	731689147	PDL06or_pct	Roughly traced	231	520	50	50	49	50	0	25	24	49	25	25	25	25	25	24	1	50	1	1	0.98	1	0			1	0.96	100	96	1	0.96	0.98	['low confidence PSD placement']	lohffa
rymert-connection_validation-732280395_ADL01od_pct	732280395	ADL01od_pct	Roughly traced	183	572	50	50	45	50	1	23	22	45	25	25	25	23	25	22	1	50	1	1	0.9	1	0.02			0.92	0.88	92	88	0.92	0.88	0.9	['Unsure if T-bar']	rymert
smithc-connection_validation-732357920_PVL03oq_pct	732357920	PVL03oq_pct	Roughly traced	151	499	47	50	35	50	2	14	21	35	25	25	25	14	25	21	3	50	0.94	1	0.7	1	0.04			0.56	0.84	56	84	0.56	0.84	0.7	['Not sure what body the T-bar glyph is on', 'Not sure T-bar glyph is on a valid T-bar', 'T-bar is not on a valid T-bar']	smithc
rymert-connection_validation-733182574_AVL23e_pct	733182574	AVL23e_pct	Roughly traced	676	1226	48	50	34	50	1	15	19	34	25	25	25	15	25	19	1	50	0.96	1	0.68	1	0.02			0.6	0.76	60	76	0.6	0.76	0.68	['HK']	rymert
ordishc-connection_validation-734693858_ADL03j_pct	734693858	ADL03j_pct	Roughly traced	334	508	48	50	38	50	0	19	19	38	25	25	25	19	25	19	0	50	0.96	1	0.76	1	0			0.76	0.76	76	76	0.76	0.76	0.76	[]	ordishc
lohffa-connection_validation-734724111_AVM15n_c_pct	734724111	AVM15n_a_pct	Roughly traced	93	65	49	50	48	50	4	24	24	48	25	25	25	24	25	24	5	50	0.98	1	0.96	1	0.08			0.96	0.96	96	96	0.96	0.96	0.96	['PSD not valid?', 'PSD not valid?', 'low confidence PSD placement', 'PSD not valid?', 'T-bar and PSD not valid?']	lohffa
rymert-connection_validation-736157288_PDM11a_pct	736157288	PDM11a_pct	Roughly traced	259	1656	50	49	41	50	0	22	19	40	25	25	25	22	25	19	0	50	1	0.98	0.82	1	0			0.88	0.76	88	76	0.88	0.76	0.8	[]	rymert
ogundeyio-connection_validation-736830579_ADM02d_pct	736830579	ADM02d_pct	Roughly traced	244	867	49	50	33	50	0	15	18	33	25	25	25	15	25	18	0	50	0.98	1	0.66	1	0			0.6	0.72	60	72	0.6	0.72	0.66	[]	ogundeyio
takemurasa-connection_validation-737218533_ADM01oq_pct	737218533	ADM01oq_pct	Roughly traced	85	307	49	50	47	50	2	24	23	47	25	25	25	24	25	23	2	50	0.98	1	0.94	1	0.04			0.96	0.92	96	92	0.96	0.92	0.94	['Low confident PSD', 'Low confident PSD']	takemurasa
lohffa-connection_validation-756502912_put_PDL07b	756502912	PDL07b_pct	Roughly traced	735	1656	49	50	49	50	2	25	24	49	25	25	25	25	25	24	5	50	0.98	1	0.98	1	0.04			1	0.96	100	96	1	0.96	0.98	['Multiple T-bars. PSD affected by nearby T-bar.', 'Multiple T-bars', 'low confidence PSD placement', 'low confidence PSD placement', 'PSD not valid?']	lohffa
lohffa-connection_validation-758178605_PDL13g_c_pct	758178605	PDL13g_pct	Roughly traced	147	250	48	50	48	50	1	24	24	48	25	25	25	24	25	24	1	50	0.96	1	0.96	1	0.02			0.96	0.96	96	96	0.96	0.96	0.96	['T-bar and PSD not valid?']	lohffa
rymert-connection_validation-759888294_PDL08ou_pct	759888294	PDL08ou_pct	Roughly traced	188	342	49	49	46	49	0	22	24	46	25	25	25	22	25	24	1	50	0.98	0.98	0.92	0.98	0			0.88	0.96	88	96	0.88	0.96	0.92	['HK']	rymert
takemurasa-connection_validation-759960572_PVL09j_pct	759960572	PVL09j_pct	Traced	397	934	46	50	41	50	2	23	18	41	25	25	25	23	25	18	2	50	0.92	1	0.82	1	0.04			0.92	0.72	92	72	0.92	0.72	0.82	['Low confindet PSD', 'Low confident Tbar']	takemurasa
takemurasa-connection_validation-760993807_AVL06oh_pct	760993807	AVL06ot_pct	Roughly traced	392	1178	48	50	45	50	1	22	23	45	25	25	25	22	25	23	1	50	0.96	1	0.9	1	0.02			0.88	0.92	88	92	0.88	0.92	0.9	['Low confident PSD']	takemurasa
ogundeyio-connection_validation-761342678_AVL06oj_pct	761342678	AVL06oj_pct	Roughly traced	307	746	50	50	34	50	3	16	18	34	25	25	25	16	25	18	3	50	1	1	0.68	1	0.06			0.64	0.72	64	72	0.64	0.72	0.68	['Low Confidence PSD', 'Low Confidence PSD', 'Low Confidence PSD']	ogundeyio
rymert-connection_validation-762111368_PVL21a_pct	762111368	PVL21a_pct	Roughly traced	507	1953	48	50	42	49	0	21	21	41	25	25	25	21	25	21	0	50	0.96	1	0.84	0.98	0			0.84	0.84	84	84	0.84	0.84	0.82	[]	rymert
rymert-connection_validation-762171741_PDM17b_pct	762171741	PDM17b_pct	Roughly traced	383	1208	49	50	37	49	2	17	20	37	25	25	25	17	25	20	2	50	0.98	1	0.74	0.98	0.04			0.68	0.8	68	80	0.68	0.8	0.74	['Unsure where cleft ends', 'Unsure if T-bar']	rymert
ogundeyio-connection_validation-762274975_ADL15p_b_pct	762274975	ADL15p_b_pct	Roughly traced	186	545	48	50	34	50	0	15	19	34	25	25	25	15	25	19	0	50	0.96	1	0.68	1	0			0.6	0.76	60	76	0.6	0.76	0.68	[]	ogundeyio
lohffa-connection_validation-764409134_PVL03or_pct	764409134	PVL03or_pct	Roughly traced	268	657	50	49	49	50	3	25	24	48	25	25	25	25	25	24	4	50	1	0.98	0.98	1	0.06			1	0.96	100	96	1	0.96	0.96	['low confidence PSD placement', 'PSD not valid?', 'PSD not valid?', 'T-bar not valid?']	lohffa
smithc-connection_validation-764817903_ADM05od_pct	764817903	ADM05od_pct	Roughly traced	277	1135	47	50	36	49	3	16	20	36	25	25	25	16	25	20	4	50	0.94	1	0.72	0.98	0.06			0.64	0.8	64	80	0.64	0.8	0.72	['Not sure T-bar glyph is on a valid T-bar', 'PSD obscured by hotknife stitch', 'T-bar and PSD glyph should be switched around', 'Not sure T-bar glyph is on a valid T-bar']	smithc
takemurasa-connection_validation-766385551_PVL04os_pct	766385551	PVL04os_pct	Roughly traced	159	673	49	50	46	50	0	23	23	46	25	25	25	23	25	23	0	50	0.98	1	0.92	1	0			0.92	0.92	92	92	0.92	0.92	0.92	[]	takemurasa
rymert-connection_validation-766505428_PDM11on_pct	766505428	PDM11on_pct	Roughly traced	93	984	50	50	44	50	3	23	21	44	26	24	26	23	24	21	3	50	1	1	0.88	1	0.06			0.884615385	0.875	88.46153846	87.5	0.884615385	0.875	0.88	['Unsure if PSD makes it in ceft', 'Unsure if PSD in cleft', 'Synapse to be split from main body']	rymert
smithc-connection_validation-767123688_PVM03b_pct	767123688	PVM03b_pct	Roughly traced	633	1499	46	50	40	50	3	20	20	40	25	25	25	20	25	20	5	50	0.92	1	0.8	1	0.06			0.8	0.8	80	80	0.8	0.8	0.8	['T-bar glyph is not on a valid T-bar', 'Not sure if there is a PSD here, because of a ripple going through the grayscale', 'T-bar glyph is on the PSD for another synapse', "Not sure what body the T-bar glyph is on and if there's a valid T-bar here", 'Not sure T-bar glyph is on a valid T-bar']	smithc
lohffa-connection_validation-767313151_FB5X	767313151	FB5X	Roughly traced	465	1472	50	50	48	49	0	23	25	47	25	25	25	23	25	25	2	50	1	1	0.96	0.98	0			0.92	1	92	100	0.92	1	0.94	['Multiple T-bars', 'Multiple T-bars']	lohffa
rymert-connection_validation-769195048_put_ADL08h	769195048	ADL08h_pct	Roughly traced	362	790	50	50	42	50	0	18	24	42	25	25	25	18	25	24	0	50	1	1	0.84	1	0			0.72	0.96	72	96	0.72	0.96	0.84	[]	rymert
lohffa-connection_validation-770249286_AVL01lx_pct	770249286	AVL01lx_pct	Roughly traced	1108	2504	49	50	48	50	1	24	24	48	25	25	25	24	25	24	3	50	0.98	1	0.96	1	0.02			0.96	0.96	96	96	0.96	0.96	0.96	['low confidence PSD placement', 'low confidence PSD placement', 'PSD not valid?']	lohffa
ogundeyio-connection_validation-770952011_ADM07z_pct	770952011	ADM07oz_pct	Roughly traced	143	502	48	50	36	50	0	19	17	36	25	25	25	19	25	17	0	50	0.96	1	0.72	1	0			0.76	0.68	76	68	0.76	0.68	0.72	[]	ogundeyio
ogundeyio-connection_validation-789588935_AVL02q_c_pct	789588935	AVL02q_b_pct	Traced	250	798	49	50	32	49	5	15	17	32	25	25	25	15	25	17	5	50	0.98	1	0.64	0.98	0.1			0.6	0.68	60	68	0.6	0.68	0.64	['Low Confidence PSD', 'Low Confidence PSD', 'Low Confidence PSD', 'Autapse', 'Low Confidence PSD']	ogundeyio
ordishc-connection_validation-789934899_PVL03c_d_pct	789934899	PVL03n_pct	Roughly traced	166	769	49	50	45	50	0	22	23	45	25	25	25	22	25	23	0	50	0.98	1	0.9	1	0			0.88	0.92	88	92	0.88	0.92	0.9	[]	ordishc
smithc-connection_validation-790417660_PDM10g_b_pct	790417660	PDM10g_pct	Roughly traced	360	820	47	50	37	50	3	17	20	37	25	25	25	17	25	20	3	50	0.94	1	0.74	1	0.06			0.68	0.8	68	80	0.68	0.8	0.74	['Not sure T-bar glyph is on a valid T-bar', 'Not sure T-bar glyph is on a valid T-bar', 'Not sure T-bar glyph is on a valid T-bar']	smithc
lohffa-connection_validation-790741191_PDM06g_c_pct	790741191	PDM06u_pct	Roughly traced	337	1174	49	49	48	50	4	25	23	47	25	25	25	25	25	23	6	50	0.98	0.98	0.96	1	0.08			1	0.92	100	92	1	0.92	0.94	['PSD not valid?', 'Multiple T-bars. PSD affected by nearby T-bar. ', 'PSD not valid?', 'low confidence PSD placement', 'T-bar not valid?', 'low confidence PSD placement']	lohffa
takemurasa-connection_validation-790918006_PDL08j_pct	790918006	PDL08j_pct	Roughly traced	135	219	47	50	39	49	1	19	20	39	25	25	25	19	25	20	5	50	0.94	1	0.78	0.98	0.02			0.76	0.8	76	80	0.76	0.8	0.78	['False positive Tbar', 'Split todo placed', 'False positive Tbar', 'Low confident PSD', 'False positive Tbar']	takemurasa
takemurasa-connection_validation-790918098_PDL08p_b_pct	790918098	PDL08p_b_pct	Roughly traced	202	505	50	50	49	50	0	25	24	49	25	25	25	25	25	24	0	50	1	1	0.98	1	0			1	0.96	100	96	1	0.96	0.98	[]	takemurasa
rymert-connection_validation-790922968_PDL08oq_pct	790922968	PDL08oq_pct	Roughly traced	187	385	49	50	44	48	2	24	20	42	25	25	25	24	25	20	3	50	0.98	1	0.88	0.96	0.04			0.96	0.8	96	80	0.96	0.8	0.84	['PSD glyph placed v far from actual', 'Unsure if PSD makes it in cleft', 'Odd looking Tbar']	rymert
ordishc-connection_validation-792079254_PDL06y_pct	792079254	PDL06y_pct	Roughly traced	361	929	45	50	33	49	0	18	15	32	25	25	25	18	25	15	0	50	0.9	1	0.66	0.98	0			0.72	0.6	72	60	0.72	0.6	0.64	[]	ordishc
smithc-connection_validation-793728667_AVM13m_pct	793728667	AVM13m_pct	Roughly traced	215	533	48	50	42	50	1	22	20	42	25	25	25	22	25	20	2	50	0.96	1	0.84	1	0.02			0.88	0.8	88	80	0.88	0.8	0.84	['Not sure T-bar glyph is on a valid T-bar', 'T-bar glyph is not on a valid T-bar']	smithc
rymert-connection_validation-793797279_put_PDM13a	793797279	PDM13lb_pct	Roughly traced	241	805	50	50	44	49	0	22	22	43	25	25	25	22	25	22	0	50	1	1	0.88	0.98	0			0.88	0.88	88	88	0.88	0.88	0.86	[]	rymert
rymert-connection_validation-796056849_AVL03n_pct	796056849	AVL03n_pct	Roughly traced	196	444	48	50	45	50	0	24	21	45	25	25	25	24	25	21	0	50	0.96	1	0.9	1	0			0.96	0.84	96	84	0.96	0.84	0.9	[]	rymert
lohffa-connection_validation-796393522_PDM06r_a_pct	796393522	PDM06r_a_pct	Roughly traced	259	683	49	50	49	49	2	25	24	48	25	25	25	25	25	24	3	50	0.98	1	0.98	0.98	0.04			1	0.96	100	96	1	0.96	0.96	['low confidence PSD placement', 'PSD not valid?', 'T-bar and PSD not valid?']	lohffa
rymert-connection_validation-796733478_PVL05ox_pct	796733478	PVL05ox_pct	Roughly traced	787	3174	50	50	48	49	0	23	25	47	25	25	25	23	25	25	0	50	1	1	0.96	0.98	0			0.92	1	92	100	0.92	1	0.94	[]	rymert
takemurasa-connection_validation-796978752_ADM06a_pct	796978752	VeLC-LVe(c)	Roughly traced	1299	3798	49	49	45	49	3	24	21	44	25	25	25	24	25	21	3	50	0.98	0.98	0.9	0.98	0.06			0.96	0.84	96	84	0.96	0.84	0.88	['Low confident PSD', 'Low confident PSD', 'Low confident PSD']	takemurasa
takemurasa-connection_validation-797194962_ADM05oe_pct	797194962	ADM05oe_pct	Traced	205	778	47	50	40	47	0	19	21	40	26	24	26	19	24	21	4	50	0.94	1	0.8	0.94	0			0.730769231	0.875	73.07692308	87.5	0.730769231	0.875	0.8	['Split todo placed', 'Split todo placed', 'Split todo placed. False positive Tbar', 'False positive Tbar']	takemurasa
ogundeyio-connection_validation-797442049_AVL11b_pct	797442049	AVL11b_pct	Roughly traced	2392	5071	49	50	36	50	0	16	20	36	25	25	25	16	25	20	0	50	0.98	1	0.72	1	0			0.64	0.8	64	80	0.64	0.8	0.72	[]	ogundeyio
lohffa-connection_validation-799586652_MBON05	799586652	MBON05	Roughly traced	1565	27110	49	50	47	50	0	23	24	47	25	25	25	23	25	24	1	50	0.98	1	0.94	1	0			0.92	0.96	92	96	0.92	0.96	0.94	['low confidence PSD placement']	lohffa
takemurasa-connection_validation-800233950_AVL13k_pct	800233950	AVL13k_pct	Roughly traced	458	1997	48	50	41	50	1	22	19	41	25	25	25	22	25	19	2	50	0.96	1	0.82	1	0.02			0.88	0.76	88	76	0.88	0.76	0.82	['Low confident PSD', 'Low confident PSD']	takemurasa
rymert-connection_validation-800929667_PDL25d_pct	800929667	SCB065_pct	Roughly traced	858	3099	50	50	47	50	0	24	23	47	25	25	25	24	25	23	0	50	1	1	0.94	1	0			0.96	0.92	96	92	0.96	0.92	0.94	[]	rymert
ordishc-connection_validation-801257348_ADL25i_pct	801257348	ADL25i_pct	Roughly traced	1094	4023	50	50	43	50	0	22	21	43	25	25	25	22	25	21	0	50	1	1	0.86	1	0			0.88	0.84	88	84	0.88	0.84	0.86	[]	ordishc
rymert-connection_validation-817044778_PDM16e_pct	817044778	PDM16e_pct	Roughly traced	22	496	40	46	39	49	4	16	23	39	25	25	25	16	25	23	7	50	0.8	0.92	0.78	0.98	0.08			0.64	0.92	64	92	0.64	0.92	0.78	['hotknife', 'Unsure if T-bar', 'PSD placed far away', 'Unsure if T-bar', 'Unsure if T-bar or v. dark PSD', 'Unsure if T-bar or v. dark PSD', 'HK']	rymert
ogundeyio-connection_validation-819220237_PDL09c_pct	819220237	PDL09c_pct	Roughly traced	175	279	50	50	41	50	1	20	21	41	25	25	25	20	25	21	1	50	1	1	0.82	1	0.02			0.8	0.84	80	84	0.8	0.84	0.82	['Low Confidence Tbar']	ogundeyio
ogundeyio-connection_validation-819992660_PDL14j_a_pct	819992660	PDL14j_a_pct	Roughly traced	152	298	47	50	30	50	2	15	15	30	25	25	25	15	25	15	2	50	0.94	1	0.6	1	0.04			0.6	0.6	60	60	0.6	0.6	0.6	['Low Confidence PSD', 'Low Confidence PSD']	ogundeyio
lohffa-connection_validation-821642912_PDL08f_pct	821642912	PDL08f_pct	Roughly traced	162	223	50	50	50	50	1	25	25	50	25	25	25	25	25	25	1	50	1	1	1	1	0.02			1	1	100	100	1	1	1	['Multiple T-bars. PSD affected by different T-bar.']	lohffa
lohffa-connection_validation-821707660_PVM10olb_pct	821707660	PVM10olb_pct	Roughly traced	53	205	49	50	49	50	5	25	24	49	25	25	25	25	25	24	5	50	0.98	1	0.98	1	0.1			1	0.96	100	96	1	0.96	0.98	['PSD not valid?', 'T-bar and PSD not valid?', 'T-bar and PSD not valid?', 'PSD not valid?', 'PSD not valid?']	lohffa
ogundeyio-connection_validation-822428009_PDL25f_pct	822428009	SCB067_pct	Roughly traced	525	1146	49	50	39	50	2	18	21	39	25	25	25	18	25	21	2	50	0.98	1	0.78	1	0.04			0.72	0.84	72	84	0.72	0.84	0.78	['Very Low Confidence PSD', 'Low Confidence PSD']	ogundeyio
smithc-connection_validation-823058891_AVL20g_pct	823058891	AVL20g_pct	Roughly traced	1886	3869	48	50	40	50	2	18	22	40	25	25	25	18	25	22	2	50	0.96	1	0.8	1	0.04			0.72	0.88	72	88	0.72	0.88	0.8	['Not sure T-bar glyph is on a valid T-bar', 'Not sure T-bar glyph is on a valid T-bar']	smithc
ogundeyio-connection_validation-827198933_ADM05q_pct	827198933	ADM05q_pct	Roughly traced	225	969	50	50	37	50	0	18	19	37	25	25	25	18	25	19	0	50	1	1	0.74	1	0			0.72	0.76	72	76	0.72	0.76	0.74	[]	ogundeyio
takemurasa-connection_validation-827794325_ADL12oa_pct	827794325	ADL12oa_pct	Roughly traced	253	593	46	50	44	50	0	24	20	44	25	25	25	24	25	20	0	50	0.92	1	0.88	1	0			0.96	0.8	96	80	0.96	0.8	0.88	[]	takemurasa
takemurasa-connection_validation-828830111_ADL12e_pct	828830111	ADL12e_pct	Roughly traced	343	861	50	50	45	50	0	21	24	45	25	25	25	21	25	24	0	50	1	1	0.9	1	0			0.84	0.96	84	96	0.84	0.96	0.9	[]	takemurasa
rymert-connection_validation-832646151_put_PDL06u	832646151	PDL06u_pct	Roughly traced	92	210	47	49	40	49	0	24	16	40	25	25	25	24	25	16	0	50	0.94	0.98	0.8	0.98	0			0.96	0.64	96	64	0.96	0.64	0.8	[]	rymert
rymert-connection_validation-851209002_PDM28i_pct	851209002	PDM28i_pct	Roughly traced	1114	2104	49	50	35	49	2	18	17	34	25	25	25	18	25	17	2	50	0.98	1	0.7	0.98	0.04			0.72	0.68	72	68	0.72	0.68	0.68	['Unsure if T-bar', 'Unsure where cleft ends']	rymert
ogundeyio-connection_validation-851399490_PDM12f_pct	851399490	PDM12j_pct	Roughly traced	174	414	48	50	39	50	6	16	23	39	25	25	25	16	25	23	6	50	0.96	1	0.78	1	0.12			0.64	0.92	64	92	0.64	0.92	0.78	['Low Confidence PSD', 'Low Confidence PSD', 'Low Confidence PSD', 'Low Confidence Tbar', 'Low Confidence PSD', 'Low Confidence PSD']	ogundeyio
takemurasa-connection_validation-852763857_PDM10oh_pct	852763857	PDM10oh_pct	Roughly traced	248	823	50	50	46	50	3	22	24	46	25	25	25	22	25	24	3	50	1	1	0.92	1	0.06			0.88	0.96	88	96	0.88	0.96	0.92	['Low confident PSD', 'Low confident PSD', 'Low confident Tbar']	takemurasa
takemurasa-connection_validation-852993150_PDL08i_pct	852993150	PDL08i_pct	Roughly traced	216	475	49	50	42	50	2	19	23	42	25	25	25	19	25	23	3	50	0.98	1	0.84	1	0.04			0.76	0.92	76	92	0.76	0.92	0.84	['Low confident PSD', 'Low confident PSD', 'False positive Tbar']	takemurasa
ogundeyio-connection_validation-853100744_PDL12j_pct	853100744	PDL12j_pct	Roughly traced	808	1471	48	50	33	50	4	17	16	33	25	25	25	17	25	16	4	50	0.96	1	0.66	1	0.08			0.68	0.64	68	64	0.68	0.64	0.66	['Low Confidence PSD', 'Low Confidence PSD', 'Low Confidence PSD', 'Low Confidence PSD']	ogundeyio
ordishc-connection_validation-853386077_PDL09oi_pct	853386077	PDL09oi_pct	Roughly traced	209	381	47	50	40	48	0	22	18	38	25	25	25	22	25	18	0	50	0.94	1	0.8	0.96	0			0.88	0.72	88	72	0.88	0.72	0.76	[]	ordishc
takemurasa-connection_validation-853437567_PVL11oc_pct	853437567	PVL11oc_pct	Roughly traced	406	1324	49	50	48	50	1	23	25	48	25	25	25	23	25	25	1	50	0.98	1	0.96	1	0.02			0.92	1	92	100	0.92	1	0.96	['Low confident PSD']	takemurasa
lohffa-connection_validation-854128583_put_PVL06i	854128583	PVL06i_pct	Roughly traced	288	366	49	50	46	49	5	25	21	45	25	25	25	25	25	21	7	50	0.98	1	0.92	0.98	0.1			1	0.84	100	84	1	0.84	0.9	['low confidence PSD placement', 'PSD not valid?', 'PSD not valid?', 'PSD not valid?', 'low confidence PSD placement', 'T-bar not valid?', 'PSD not valid?']	lohffa
lohffa-connection_validation-855439675_AVL02or_pct	855439675	AVL02or_pct	Roughly traced	205	424	49	49	49	50	2	24	25	49	25	25	25	24	25	25	3	50	0.98	0.98	0.98	1	0.04			0.96	1	96	100	0.96	1	0.98	['T-bar and PSD not valid?', 'low confidence PSD placement', 'PSD not valid?']	lohffa
rymert-connection_validation-857235574_ADM01i_a_pct	857235574	ADM01lh_pct	Roughly traced	179	478	50	50	39	49	1	20	19	39	25	25	25	20	25	19	1	50	1	1	0.78	0.98	0.02			0.8	0.76	80	76	0.8	0.76	0.78	['Unsure if PSD in cleft']	rymert
lohffa-connection_validation-857451691_put_ADL05oc	857451691	ADL05oc_pct	Roughly traced	101	139	46	50	46	50	7	22	24	46	25	25	25	22	25	24	12	50	0.92	1	0.92	1	0.14			0.88	0.96	88	96	0.88	0.96	0.92	['PSD not valid?', 'PSD not valid?', 'Multiple T-bars. PSD affected by nearby T-bar.', 'PSD not valid?', 'low confidence PSD placement', 'low confidence PSD placement', 'low confidence PSD placement', 'PSD not valid?', 'PSD not valid?', 'low confidence PSD placement', 'T-bar and PSD not valid?', 'low confidence PSD placement']	lohffa
lohffa-connection_validation-858453703_PVL08n_pct	858453703	PVL08n_pct	Roughly traced	239	819	46	50	42	49	0	23	19	41	25	25	25	23	25	19	2	50	0.92	1	0.84	0.98	0			0.92	0.76	92	76	0.92	0.76	0.82	['T-bar is actually PSD', 'T-bar is actually PSD']	lohffa
rymert-connection_validation-858458268_AVL06d_pct	858458268	AVL06d_pct	Roughly traced	630	1562	49	50	42	49	0	22	20	41	25	25	25	22	25	20	0	50	0.98	1	0.84	0.98	0			0.88	0.8	88	80	0.88	0.8	0.82	[]	rymert
lohffa-connection_validation-858838262_ADL14m_a_pct	858838262	ADL14m_a_pct	Roughly traced	252	1131	50	50	50	50	0	25	25	50	25	25	25	25	25	25	2	50	1	1	1	1	0			1	1	100	100	1	1	1	['low confidence PSD placement', 'low confidence PSD placement']	lohffa
rymert-connection_validation-858906840_AVM17g_pct	858906840	AVM17g_pct	Roughly traced	674	1855	50	50	44	50	1	20	24	44	25	25	25	20	25	24	1	50	1	1	0.88	1	0.02			0.8	0.96	80	96	0.8	0.96	0.88	['Bad EM at pot. synapse']	rymert
rymert-connection_validation-859144723_put_AVL06k	859144723	AVL06k_pct	Roughly traced	278	897	48	49	46	48	1	23	23	45	25	25	25	23	25	23	2	50	0.96	0.98	0.92	0.96	0.02			0.92	0.92	92	92	0.92	0.92	0.9	['hotknife', 'Unsure if T-bar']	rymert
lohffa-connection_validation-861242327_put_ADM11f	861242327	ADM11f_pct	Roughly traced	738	3416	50	50	49	50	2	24	25	49	25	25	25	24	25	25	2	50	1	1	0.98	1	0.04			0.96	1	96	100	0.96	1	0.98	['Multiple T-bars. PSD affected by nearby T-bar.', 'PSD not valid?']	lohffa
lohffa-connection_validation-861260193_ADM05c_pct	861260193	ADM05c_pct	Roughly traced	342	1303	49	50	49	50	1	24	25	49	25	25	25	24	25	25	1	50	0.98	1	0.98	1	0.02			0.96	1	96	100	0.96	1	0.98	['PSD not valid?']	lohffa
lohffa-connection_validation-862036858_FB4P_b	862036858	FB4P_b	Roughly traced	770	2126	49	49	43	50	2	22	21	43	25	25	25	22	25	21	6	50	0.98	0.98	0.86	1	0.04			0.88	0.84	88	84	0.88	0.84	0.86	['low confidence PSD placement', 'low confidence PSD placement', 'PSD not valid?', 'low confidence PSD placement', 'PSD not valid?', 'T-bar and PSD are same body']	lohffa
rymert-connection_validation-880875742_IbSpsP	880875742	IbSpsP	Roughly traced	259	600	47	50	43	50	0	21	22	43	25	25	25	21	25	22	0	50	0.94	1	0.86	1	0			0.84	0.88	84	88	0.84	0.88	0.86	[]	rymert
takemurasa-connection_validation-880987657_PDL16oa_pct	880987657	PDL16oa_pct	Roughly traced	243	258	49	50	44	50	0	22	22	44	25	25	25	22	25	22	0	50	0.98	1	0.88	1	0			0.88	0.88	88	88	0.88	0.88	0.88	[]	takemurasa
rymert-connection_validation-880987844_PDL16k_pct	880987844	PDL16k_pct	Roughly traced	227	355	50	50	44	49	1	23	21	43	25	25	25	23	25	21	1	50	1	1	0.88	0.98	0.02			0.92	0.84	92	84	0.92	0.84	0.86	['cleft obscured by HK']	rymert
takemurasa-connection_validation-881005404_PVL07b_pct	881005404	PVL07b_pct	Roughly traced	109	118	47	50	43	50	0	22	21	43	25	25	25	22	25	21	1	50	0.94	1	0.86	1	0			0.88	0.84	88	84	0.88	0.84	0.86	['False positive Tbar']	takemurasa
smithc-connection_validation-882987799_AVL02olc_pct	882987799	AVL02olc_pct	Roughly traced	100	116	47	50	39	50	2	23	16	39	25	25	25	23	25	16	3	50	0.94	1	0.78	1	0.04			0.92	0.64	92	64	0.92	0.64	0.78	['Not sure T-bar glyph is on a valid T-bar', 'Not sure T-bar glyph is on a valid T-bar', 'T-bar glyph is on a PSD of a synapse on the body that the PSD glyph is on ']	smithc
lohffa-connection_validation-883358778_PVL03b_pct	883358778	PVL03b_pct	Roughly traced	82	152	50	50	49	50	4	24	25	49	25	25	25	24	25	25	7	50	1	1	0.98	1	0.08			0.96	1	96	100	0.96	1	0.98	['low confidence PSD placement', 'PSD not valid?', 'low confidence PSD placement', 'Multiple T-bars', 'T-bar and PSD not valid?', 'PSD not valid?', 'PSD not valid?']	lohffa
ogundeyio-connection_validation-884157443_PVM03p_pct	884157443	PVM03lb_pct	Roughly traced	148	440	48	50	34	49	1	18	16	34	25	25	25	18	25	16	2	50	0.96	1	0.68	0.98	0.02			0.72	0.64	72	64	0.72	0.64	0.68	['Low Confidence Tbar', 'False merge in PSD. Smaller segment is actually connected to current Tbar']	ogundeyio
rymert-connection_validation-884477487_PVL15v_pct	884477487	PVL15v_pct	Roughly traced	559	5877	48	50	46	50	0	21	25	46	25	25	25	21	25	25	0	50	0.96	1	0.92	1	0			0.84	1	84	100	0.84	1	0.92	[]	rymert
ogundeyio-connection_validation-884921013_FB7G	884921013	FB7I	Roughly traced	495	1868	50	50	42	50	0	20	22	42	25	25	25	20	25	22	0	50	1	1	0.84	1	0			0.8	0.88	80	88	0.8	0.88	0.84	[]	ogundeyio
lohffa-connection_validation-885106439_PDL14u_pct	885106439	PDL27f_pct	Roughly traced	487	661	49	50	45	50	2	23	22	45	25	25	25	23	25	22	4	50	0.98	1	0.9	1	0.04			0.92	0.88	92	88	0.92	0.88	0.9	['T-bar is actually PSD', 'PSD not valid?', 'PSD not valid?', 'PSD affected by different T-bar.']	lohffa
smithc-connection_validation-885776346_PDL09a_pct	885776346	PDL09a_pct	Roughly traced	221	395	50	50	42	50	0	22	20	42	25	25	25	22	25	20	0	50	1	1	0.84	1	0			0.88	0.8	88	80	0.88	0.8	0.84	[]	smithc
smithc-connection_validation-886280796_Delta6F_a	886280796	Delta6F_a	Roughly traced	388	2938	47	49	44	50	2	20	24	43	25	25	25	20	25	24	3	50	0.94	0.98	0.88	1	0.04			0.8	0.96	80	96	0.8	0.96	0.86	['T-bar glyph appears to be on a PSD', 'T-bar glyph seems to be on a PSD', 'T-bra glyph is on a PSD']	smithc
ordishc-connection_validation-886527723_ADL07k_pct	886527723	ADL07oa_pct	Roughly traced	393	390	45	50	39	50	0	22	17	39	25	25	25	22	25	17	0	50	0.9	1	0.78	1	0			0.88	0.68	88	68	0.88	0.68	0.78	[]	ordishc
ogundeyio-connection_validation-890204660_PVL11x_pct	890204660	PVL11x_pct	Roughly traced	242	640	49	50	34	50	1	19	15	34	25	25	25	19	25	15	1	50	0.98	1	0.68	1	0.02			0.76	0.6	76	60	0.76	0.6	0.68	['Low Confidence PSD']	ogundeyio
takemurasa-connection_validation-892614148_ADL06f_pct	892614148	ADL06f_pct	Roughly traced	198	551	47	50	40	50	0	19	21	40	25	25	25	19	25	21	0	50	0.94	1	0.8	1	0			0.76	0.84	76	84	0.76	0.84	0.8	[]	takemurasa
lohffa-connection_validation-912022866_PDL16j_pct	912022866	PDL16j_pct	Roughly traced	122	314	50	50	47	49	1	24	23	46	25	25	25	24	25	23	4	50	1	1	0.94	0.98	0.02			0.96	0.92	96	92	0.96	0.92	0.92	['low confidence PSD placement', 'low confidence PSD placement', 'low confidence PSD placement', 'PSD not valid?']	lohffa
smithc-connection_validation-912045178_PVL03c_b_pct	912045178	PVL03c_pct	Roughly traced	248	527	48	50	44	50	2	24	20	44	25	25	25	24	25	20	2	50	0.96	1	0.88	1	0.04			0.96	0.8	96	80	0.96	0.8	0.88	['T-bar glyph is on a PSD', 'Not sure T-bar glyph is on a valid T-bar']	smithc
rymert-connection_validation-912390224_PVL03i_pct	912390224	PVL03i_pct	Roughly traced	139	398	49	50	44	50	0	23	21	44	25	25	25	23	25	21	0	50	0.98	1	0.88	1	0			0.92	0.84	92	84	0.92	0.84	0.88	[]	rymert
lohffa-connection_validation-913468894_PVM05f_pct	913468894	PVM05f_pct	Roughly traced	65	181	44	50	44	49	3	22	22	43	25	25	25	22	25	22	3	50	0.88	1	0.88	0.98	0.06			0.88	0.88	88	88	0.88	0.88	0.86	['PSD not valid?', 'T-bar and PSD not valid?', 'T-bar and PSD not valid?']	lohffa
rymert-connection_validation-913474046_put_PVL09u	913474046	PVL09u_pct	Roughly traced	452	507	49	50	45	46	1	23	22	41	25	25	25	23	25	22	1	50	0.98	1	0.9	0.92	0.02			0.92	0.88	92	88	0.92	0.88	0.82	['low confidence']	rymert
smithc-connection_validation-914850280_PDM10e_pct	914850280	PDM10e_pct	Roughly traced	236	356	49	50	36	50	1	20	16	36	25	25	25	20	25	16	1	50	0.98	1	0.72	1	0.02			0.8	0.64	80	64	0.8	0.64	0.72	['Not sure T-bar glyph is on a valid T-bar']	smithc
ogundeyio-connection_validation-915610815_FB8G	915610815	FB7J	Roughly traced	236	2221	46	50	38	50	2	17	21	38	25	25	25	17	25	21	2	50	0.92	1	0.76	1	0.04			0.68	0.84	68	84	0.68	0.84	0.76	['Low Confidence PSD', 'Low Confidence PSD']	ogundeyio
lohffa-connection_validation-916288456_FB7A	916288456	FB7K	Roughly traced	329	749	48	50	46	49	3	24	22	45	25	25	25	24	25	22	5	50	0.96	1	0.92	0.98	0.06			0.96	0.88	96	88	0.96	0.88	0.9	['low confidence PSD placement', 'T-bar is actually PSD.', 'PSD not valid?', 'PSD not valid?', 'PSD not valid?']	lohffa
takemurasa-connection_validation-917553030_PVL18ola_pct	917553030	PVL18ola_pct	Roughly traced	443	1269	48	50	46	50	1	23	23	46	25	25	25	23	25	23	1	50	0.96	1	0.92	1	0.02			0.92	0.92	92	92	0.92	0.92	0.92	['Low confident PSD']	takemurasa
smithc-connection_validation-917647959_ExR1	917647959	ExR1	Traced	1581	9933	45	50	38	50	5	18	20	38	25	25	25	18	25	20	5	50	0.9	1	0.76	1	0.1			0.72	0.8	72	80	0.72	0.8	0.76	['Not sure T-bar glyph is on a valid T-bar', 'T-bar glyph seems to be on a PSD', 'T-bar glyph seems to be on a PSD', 'Not sure T-bar glyph is on a valid T-bar', 'Not sure T-bar glyph is on a valid T-bar']	smithc
takemurasa-connection_validation-919202307_PVL11q_pct	919202307	PVL11q_pct	Roughly traced	1085	1803	50	50	43	50	0	22	21	43	25	25	25	22	25	21	0	50	1	1	0.86	1	0			0.88	0.84	88	84	0.88	0.84	0.86	[]	takemurasa
smithc-connection_validation-920536487_AVL03c_c_pct	920536487	AVL03lk_pct	Roughly traced	435	1822	50	50	37	50	0	15	22	37	25	25	25	15	25	22	0	50	1	1	0.74	1	0			0.6	0.88	60	88	0.6	0.88	0.74	[]	smithc
ogundeyio-connection_validation-920873167_PVL04b_b_pct	920873167	PVL04b_pct	Roughly traced	386	1283	49	50	28	50	1	10	18	28	25	25	25	10	25	18	1	50	0.98	1	0.56	1	0.02			0.4	0.72	40	72	0.4	0.72	0.56	['Low Confidence PSD']	ogundeyio
takemurasa-connection_validation-921667198_AVM07g_a_pct	921667198	AVM07z_pct	Roughly traced	186	626	49	50	42	50	1	21	21	42	25	25	25	21	25	21	1	50	0.98	1	0.84	1	0.02			0.84	0.84	84	84	0.84	0.84	0.84	['Low confident PSD']	takemurasa
lohffa-connection_validation-922659797_PVL11r_pct	922659797	PVL11r_pct	Roughly traced	537	1018	50	50	50	49	1	25	25	49	25	25	25	25	25	25	1	50	1	1	1	0.98	0.02			1	1	100	100	1	1	0.98	['Multiple T-bars. PSD affected by nearby T-bar.']	lohffa
lohffa-connection_validation-922988906_ADM01b_b_pct	922988906	ADM01b_b_pct	Roughly traced	99	227	50	50	50	50	0	25	25	50	25	25	25	25	25	25	2	50	1	1	1	1	0			1	1	100	100	1	1	1	['low confidence PSD placement', 'low confidence PSD placement']	lohffa
ordishc-connection_validation-941145299_PDM23c_pct	941145299	PDM23c_pct	Roughly traced	125	263	49	50	43	49	0	21	22	42	25	25	25	21	25	22	0	50	0.98	1	0.86	0.98	0			0.84	0.88	84	88	0.84	0.88	0.84	[]	ordishc
rymert-connection_validation-943412282_AVL04b_a_pct	943412282	AVL04b_a_pct	Roughly traced	96	363	49	49	41	49	2	18	23	41	25	25	25	18	25	23	3	50	0.98	0.98	0.82	0.98	0.04			0.72	0.92	72	92	0.72	0.92	0.82	['PSD on edge of cleft', 'Unsure if PSD in cleft', 'HK']	rymert
rymert-connection_validation-943420877_AVL04g_pct	943420877	AVL04g_pct	Roughly traced	83	298	50	50	46	50	0	24	22	46	25	25	25	24	25	22	0	50	1	1	0.92	1	0			0.96	0.88	96	88	0.96	0.88	0.92	[]	rymert
takemurasa-connection_validation-943425979_PDL12x_pct	943425979	PDL12x_pct	Roughly traced	436	689	50	50	46	49	0	23	23	46	25	25	25	23	25	23	1	50	1	1	0.92	0.98	0			0.92	0.92	92	92	0.92	0.92	0.92	['Split todo placed']	takemurasa
takemurasa-connection_validation-944132752_PVL03q_pct	944132752	PVL03q_pct	Roughly traced	364	274	49	50	44	50	1	23	21	44	25	25	25	23	25	21	1	50	0.98	1	0.88	1	0.02			0.92	0.84	92	84	0.92	0.84	0.88	['Low confident PSD']	takemurasa
lohffa-connection_validation-945237807_put_ADM03ow	945237807	ADM03ow_pct	Roughly traced	281	4693	46	48	46	50	2	22	24	46	25	25	25	22	25	24	4	50	0.92	0.96	0.92	1	0.04			0.88	0.96	88	96	0.88	0.96	0.92	['Multiple T-bars. PSD affected by nearby T-bar.', 'low confidence PSD placement', 'PSD not valid?', 'T-bar is actually PSD']	lohffa
smithc-connection_validation-945527072_AVL06og_pct	945527072	AVL06h_e_pct	Roughly traced	279	557	45	50	33	49	5	17	16	33	25	25	25	17	25	16	6	50	0.9	1	0.66	0.98	0.1			0.68	0.64	68	64	0.68	0.64	0.66	['Not sure T-bar is on a valid T-bar for this body', 'T-bar glyph appears to be on a PSD', 'Not sure if PSD is valid, hotknife stitch obscures view', 'T-bar glyph is not on a valid T-bar', 'Not sure T-bar glyph is on a valid T-bar', 'Not sure T-bar glyph is on a valid T-bar']	smithc
lohffa-connection_validation-946123380_ADL05w_d_pct	946123380	ADL05w_d_pct	Roughly traced	147	307	50	50	48	50	2	24	24	48	25	25	25	24	25	24	3	50	1	1	0.96	1	0.04			0.96	0.96	96	96	0.96	0.96	0.96	['PSD not valid?', 'PSD not valid?', 'low confidence PSD placement']	lohffa
lohffa-connection_validation-946300206_FB5G	946300206	FB5G	Roughly traced	468	1280	49	49	48	49	2	24	24	46	25	25	25	24	25	24	5	50	0.98	0.98	0.96	0.98	0.04			0.96	0.96	96	96	0.96	0.96	0.92	['T-bar and PSD not valid?', 'T-bar and PSD not valid?', 'Multiple T-bars', 'low confidence PSD placement', 'low confidence PSD placement']	lohffa
takemurasa-connection_validation-947172504_PVL10q_b_pct	947172504	PVL10q_pct	Roughly traced	196	425	48	50	40	50	0	19	21	40	25	25	25	19	25	21	0	50	0.96	1	0.8	1	0			0.76	0.84	76	84	0.76	0.84	0.8	[]	takemurasa
lohffa-connection_validation-947233693_AVL08oe_pct	947233693	AVL08oe_pct	Roughly traced	108	187	50	50	49	50	3	25	24	49	25	25	25	25	25	24	4	50	1	1	0.98	1	0.06			1	0.96	100	96	1	0.96	0.98	['PSD not valid?', 'low confidence PSD placement', 'Multiple T-bars. PSD affected by nearby T-bar.', 'PSD not valid?']	lohffa
rymert-connection_validation-947590512_ADL01a_pct	947590512	ADL01a_pct	Roughly traced	928	3275	49	50	43	50	0	22	21	42	25	25	25	22	25	21	0	50	0.98	1	0.86	1	0			0.88	0.84	88	84	0.88	0.84	0.84	[]	rymert
takemurasa-connection_validation-947608249_PDM16c_pct	947608249	PDM16c_pct	Roughly traced	174	689	45	50	38	49	0	17	21	38	25	25	25	17	25	21	1	50	0.9	1	0.76	0.98	0			0.68	0.84	68	84	0.68	0.84	0.76	['I believe this is not a Tbar']	takemurasa
ogundeyio-connection_validation-949930583_AVM09h_a_pct	949930583	AVM09h_pct	Roughly traced	51	159	50	50	37	50	1	17	20	37	25	25	25	17	25	20	1	50	1	1	0.74	1	0.02			0.68	0.8	68	80	0.68	0.8	0.74	['Low Confidence PSD']	ogundeyio
smithc-connection_validation-950544340_AVL11oa_pct	950544340	AVL11oa_pct	Roughly traced	376	936	46	50	35	50	0	18	17	35	25	25	25	18	25	17	4	50	0.92	1	0.7	1	0			0.72	0.68	72	68	0.72	0.68	0.7	['T-bar glyph is not on a valid T-bar', 'T-bar glyph is not on a valid T-bar', 'T-bar glyph is not on a valid T-bar', 'T-bar glyph is not on a valid T-bar']	smithc
takemurasa-connection_validation-950928506_ADL12a_b_pct	950928506	ADL12la_pct	Roughly traced	461	749	48	50	45	50	0	22	23	45	25	25	25	22	25	23	0	50	0.96	1	0.9	1	0			0.88	0.92	88	92	0.88	0.92	0.9	[]	takemurasa
lohffa-connection_validation-951934183_put_AVL26b	951934183	AVL26b_pct	Roughly traced	851	1931	50	50	49	50	6	24	25	49	25	25	25	24	25	25	9	50	1	1	0.98	1	0.12			0.96	1	96	100	0.96	1	0.98	['Strongly disagree with T-bar glyph placement, but PSD is affected by T-bar.', 'Strongly disagree with T-bar glyph placement, but PSD is affected by T-bar.', 'PSD not valid?', 'low confidence PSD placement', 'low confidence PSD placement', 'T-bar and PSD not valid?', 'low confidence PSD placement', 'T-bar and PSD not valid?', 'PSD not valid?']	lohffa
takemurasa-connection_validation-951959415_AVL08c_pct	951959415	AVL08c_pct	Roughly traced	274	1706	47	50	46	50	1	22	24	46	25	25	25	22	25	24	4	50	0.94	1	0.92	1	0.02			0.88	0.96	88	96	0.88	0.96	0.92	['False positive Tbar', 'False positive Tbar', 'Low confident PSD', 'False positive Tbar']	takemurasa
ogundeyio-connection_validation-952266169_AVL02y_pct	952266169	AVL02y_pct	Roughly traced	307	761	48	50	37	50	1	18	19	37	25	25	25	18	25	19	1	50	0.96	1	0.74	1	0.02			0.72	0.76	72	76	0.72	0.76	0.74	['Low Confidence PSD']	ogundeyio
[truncated: 499 more rows]
[truncated: 10 more columns]
