# Supplementary material for: A connectome and analysis of the adult Drosophila central brain
Source: eLife. 2020 Sep 7;9:e57443. doi: 10.7554/eLife.57443 (PMC7546738; doi:10.7554/eLife.57443)
Supplement: Supplementary file 1. [file elife-57443-supp1.xlxs]

## Sheet: otm
ROI.thresh	Type	Number	Body ID	Instance name	Many type	Number	Downstream	Strength	Upstream	Strength
all.1	APL	1	425790257	APL_R	KCa'b'-ap1	91	91	54.187	91	64.67
all.1	APL	1	425790257	APL_R	KCa'b'-ap2	127	127	60.685	127	53.299
all.1	APL	1	425790257	APL_R	KCab-c	252	252	22.131	252	52.849
all.1	APL	1	425790257	APL_R	KCab-m	354	354	33.754	354	37.393
all.1	APL	1	425790257	APL_R	KCa'b'-m	119	119	60.462	119	59.765
all.1	APL	1	425790257	APL_R	KCab-p	60	60	56.433	60	61.983
all.1	APL	1	425790257	APL_R	KCab-s	223	223	45.807	223	39.619
all.1	APL	1	425790257	APL_R	KCg-d	99	99	47.778	99	47.838
all.1	APL	1	425790257	APL_R	KCg-m	590	590	67.305	590	63.529
all.1	APL	1	425790257	APL_R	PAM01_a	25	24	5.375	25	6.12
all.1	APL	1	425790257	APL_R	PAM04_a	31	28	3.571	31	8.097
all.1	APL	1	425790257	APL_R	PAM06_a	24	24	4.292	24	8
all.1	APL	1	425790257	APL_R	PAM12	23	22	3.682	22	7.682
all.1	AVLP077	1	1136752885	AVLP077_R	LC11	70	64	3.672	69	8.058
all.1	AVLP079	1	950880008	AVLP079_R	LC11	70	70	12.986	70	13.829
all.1	AVLP086	1	1013982515	AVLP086_R	LC11	70	68	4.985	70	9.571
all.1	DPM	2	5813105172	DPM_R	KCa'b'-ap1	91	91	22.989	91	63.648
all.1	DPM	2	5813105172	DPM_R	KCa'b'-ap2	127	127	27.417	127	57.646
all.1	DPM	2	5813105172	DPM_R	KCab-c	252	252	8.024	252	14.167
all.1	DPM	2	5813105172	DPM_R	KCab-m	354	354	13.037	354	26.836
all.1	DPM	2	5813105172	DPM_R	KCa'b'-m	119	119	30.42	119	61.866
all.1	DPM	2	5813105172	DPM_R	KCab-p	60	60	18.1	60	37.983
all.1	DPM	2	5813105172	DPM_R	KCab-s	223	223	13.686	223	30.318
all.1	DPM	2	5813105172	DPM_R	KCg-d	99	99	13.778	99	33.859
all.1	DPM	2	5813105172	DPM_R	KCg-m	590	590	16.376	590	33.927
all.1	DPM	2	5813105172	DPM_R	PAM01_a	25	25	20.24	23	4.522
all.1	DPM	2	425276848	DPM_L	PAM01_a	25	25	21.4	24	4.708
all.1	DPM	2	5813105172	DPM_R	PAM04_a	31	31	6.935	30	5.967
all.1	DPM	2	5813105172	DPM_R	PAM06_a	24	24	8.125	24	8.292
all.1	DPM	2	425276848	DPM_L	PAM06_a	24	24	6.333	24	7.5
all.1	DPM	2	5813105172	DPM_R	PAM12	23	22	16.955	21	7.286
all.1	DPM	2	425276848	DPM_L	PAM12	23	23	20.087	23	9.522
all.1	ExR3	2	1036637638	ExR3(ring)_R	ER2_c	21	21	6.619	20	3.8
all.1	ExR3	2	919763043	ExR3(ring)_L	ER2_c	21	21	6	21	4
all.1	ExR3	2	1036637638	ExR3(ring)_R	ER4d	25	25	10.6	23	3
all.1	ExR3	2	919763043	ExR3(ring)_L	ER4d	25	25	9.56	25	4
all.1	ExR3	2	1036637638	ExR3(ring)_R	ER5	20	18	4.722	20	5.15
all.1	ExR3	2	919763043	ExR3(ring)_L	ER5	20	19	5.316	19	6.789
all.1	ExR3	2	1036637638	ExR3(ring)_R	hDeltaK	31	31	49.839	31	38.645
all.1	ExR3	2	919763043	ExR3(ring)_L	hDeltaK	31	31	51.645	31	41.935
all.1	ExR4	2	1730608428	ExR4(ring)_R	EPG	46	46	16.913	46	33.435
all.1	ExR4	2	1198330641	ExR4(ring)_L	EPG	46	46	15.957	46	12.283
all.1	ExR4	2	1730608428	ExR4(ring)_R	PEN_a(PEN1)	20	20	40.7	20	9.55
all.1	ExR4	2	1198330641	ExR4(ring)_L	PEN_a(PEN1)	20	20	39	20	9.6
all.1	ExR4	2	1730608428	ExR4(ring)_R	PEN_b(PEN2)	22	22	76.545	22	7.318
all.1	ExR4	2	1198330641	ExR4(ring)_L	PEN_b(PEN2)	22	22	77.909	22	5.773
all.1	ExR6	2	858587718	ExR6(ring)_R	EPG	46	46	66.478	46	92.63
all.1	ExR6	2	1228692168	ExR6(ring)_L	EPG	46	46	48.609	46	56.717
all.1	ExR6	2	858587718	ExR6(ring)_R	PEN_a(PEN1)	20	20	96.65	20	16.55
all.1	ExR6	2	1228692168	ExR6(ring)_L	PEN_a(PEN1)	20	20	94.45	20	17.9
all.1	ExR6	2	858587718	ExR6(ring)_R	PEN_b(PEN2)	22	20	3.5	21	5.571
all.1	ExR6	2	1228692168	ExR6(ring)_L	PEN_b(PEN2)	22	20	3.5	22	6.182
all.1	FB1H	2	519046655	FB1H(NO2/3)_L	FC2B	33	33	7.788	32	3.281
all.1	FB1H	2	5813062858	FB1H(NO2/3)_R	FC2B	33	33	7.364	31	3.355
all.1	FB1H	2	519046655	FB1H(NO2/3)_L	hDeltaJ	29	29	26.276	29	19.828
all.1	FB1H	2	5813062858	FB1H(NO2/3)_R	hDeltaJ	29	29	26.655	29	18.276
all.1	FB1H	2	519046655	FB1H(NO2/3)_L	PFNd	40	40	8.8	39	4.154
all.1	FB1H	2	5813062858	FB1H(NO2/3)_R	PFNd	40	40	8.5	39	3.538
all.1	FB1H	2	519046655	FB1H(NO2/3)_L	PFNp_c	46	45	4.911	46	7.261
all.1	FB1H	2	5813062858	FB1H(NO2/3)_R	PFNp_c	46	45	4.489	46	5.5
all.1	FB1H	2	519046655	FB1H(NO2/3)_L	PFNp_e	21	20	3.8	21	7.857
all.1	FB1H	2	5813062858	FB1H(NO2/3)_R	PFNp_e	21	19	3.474	20	6.45
all.1	FB1H	2	519046655	FB1H(NO2/3)_L	PFNv	20	20	8.15	20	3.6
all.1	FB1H	2	5813062858	FB1H(NO2/3)_R	PFNv	20	20	11.55	20	4.5
all.1	FB1H	2	519046655	FB1H(NO2/3)_L	PFR_a	29	29	9.414	29	7.69
all.1	FB1H	2	5813062858	FB1H(NO2/3)_R	PFR_a	29	29	9.448	29	6.241
all.1	FB1I	2	916628962	FB1I_R	vDeltaA_b	31	30	6.267	30	6.3
all.1	FB1I	2	947664053	FB1I_L	vDeltaB	32	32	16.75	31	10.097
all.1	FB1I	2	916628962	FB1I_R	vDeltaB	32	32	16.094	32	8.656
all.1	FB1J	2	885598938	FB1J_R	vDeltaA_b	31	29	8.034	31	4.968
all.1	FB1J	2	885939922	FB1J_L	vDeltaA_b	31	30	10.7	30	4.3
all.1	FB3B	2	5813057963	FB3B(EB)_R	PEN_a(PEN1)	20	20	10.4	18	3.222
all.1	FB4B	2	1106857669	FB4B(NO2)_R	PFNd	40	40	5.575	40	5.1
all.1	FB4B	2	1101133698	FB4B(NO2)_L	PFNd	40	40	5.875	40	5.475
all.1	FB4B	2	1101133698	FB4B(NO2)_L	PFNv	20	20	12.6	18	2.278
all.1	FB4C	2	1225290633	FB4C(NO2)_R	PFNd	40	40	38.3	40	9.675
all.1	FB4C	2	1131836229	FB4C(NO2)_L	PFNd	40	40	38.8	40	8.875
all.1	FB4G	2	988567837	FB4G_R	vDeltaL	38	38	16.316	38	5.184
all.1	FB4G	2	5813061541	FB4G_L	vDeltaL	38	38	14.816	38	5.395
all.1	FB4H	2	953414780	FB4H_R	vDeltaK	46	46	31.696	46	9.913
all.1	FB4H	2	5813053846	FB4H_L	vDeltaK	46	46	32.326	46	10.413
all.1	FB4H	2	953414780	FB4H_R	vDeltaL	38	38	13.184	38	7.868
all.1	FB4H	2	5813053846	FB4H_L	vDeltaL	38	38	13.105	38	9
all.1	FB4H	2	953414780	FB4H_R	vDeltaM	58	58	9.19	55	5.927
all.1	FB4H	2	5813053846	FB4H_L	vDeltaM	58	57	9.053	57	5.088
all.1	FB4N	2	673746277	FB4N_R	PFR_a	29	27	3.667	27	3.963
all.1	FB4N	2	5813058422	FB4N_L	PFR_a	29	28	4.571	29	4.655
all.1	FB4Q_a	2	859977121	FB4Q_a_R	PFR_a	29	29	9.276	28	10.5
all.1	FB4Q_a	2	859714144	FB4Q_a_L	PFR_a	29	28	9.643	29	8.034
all.1	FB4X	2	5813041796	FB4X_L	hDeltaJ	29	29	18.897	29	38.103
all.1	FB4X	2	548907426	FB4X_R	hDeltaJ	29	29	21.69	29	38.483
all.1	FB4X	2	5813041796	FB4X_L	PFR_a	29	29	8.655	29	19.241
all.1	FB4X	2	548907426	FB4X_R	PFR_a	29	29	8.621	29	19.828
all.1	FB5AB	2	5813047763	FB5AB_R	hDeltaC	20	20	29	19	4.211
all.1	FB5AB	2	946304488	FB5AB_L	hDeltaC	20	20	25.1	20	4.4
all.1	FB5C	2	5812983636	FB5C_L	PFR_a	29	27	4.111	28	4.964
all.1	FB5D	2	5813076043	FB5D_L	PFR_a	29	28	4.607	29	4.379
all.1	FB5D	2	890671753	FB5D_R	PFR_a	29	27	6.074	27	6.519
all.1	FB5E	2	5813021247	FB5E_R	PFR_a	29	28	3.357	28	4.536
all.1	FB5E	2	798002859	FB5E_L	PFR_a	29	29	3.069	28	4.357
all.1	FB5F	2	705463539	FB5F_R	FS1A	44	42	5.786	41	3.463
all.1	FB5H	2	362715189	FB5H_R	vDeltaI	25	25	19.48	25	12.92
all.1	FB5H	2	486315287	FB5H_L	vDeltaI	25	25	18.84	25	12.76
all.1	FB5I	2	423770604	FB5I_R	hDeltaC	20	20	47.55	20	42.25
all.1	FB5I	2	5813047616	FB5I_L	hDeltaC	20	20	46.8	20	40.6
all.1	FB5I	2	423770604	FB5I_R	hDeltaJ	29	27	7.519	29	23.31
all.1	FB5I	2	5813047616	FB5I_L	hDeltaJ	29	29	7.552	29	24.69
all.1	FB5I	2	423770604	FB5I_R	PFR_a	29	29	24.345	29	10.448
all.1	FB5I	2	5813047616	FB5I_L	PFR_a	29	29	25.724	29	11.345
all.1	FB5I	2	423770604	FB5I_R	vDeltaE	23	23	21.652	22	4.182
all.1	FB5I	2	5813047616	FB5I_L	vDeltaE	23	23	20.478	22	3.182
all.1	FB5J	2	766863785	FB5J_R	hDeltaC	20	20	9.25	20	5.75
all.1	FB5J	2	1102514975	FB5J_L	hDeltaC	20	20	15.95	20	10.8
all.1	FB5J	2	766863785	FB5J_R	hDeltaJ	29	29	10.586	29	8.793
all.1	FB5J	2	1102514975	FB5J_L	hDeltaJ	29	29	9.448	29	8.655
all.1	FB5L	2	977339122	FB5L_R	vDeltaE	23	23	32.304	23	21.261
all.1	FB5L	2	5813022949	FB5L_L	vDeltaE	23	23	33.609	23	22.304
all.1	FB5L	2	977339122	FB5L_R	vDeltaI	25	25	8.24	25	5.24
all.1	FB5N	2	5813058442	FB5N_L	hDeltaC	20	20	3.85	19	2.842
all.1	FB6D	2	946641212	FB6D_R	hDeltaC	20	20	24.05	18	2.889
all.1	FB6D	2	946641212	FB6D_R	hDeltaK	31	31	9	31	31.161
all.1	FB6D	2	5813026514	FB6D_L	hDeltaK	31	31	7.323	31	26.323
all.1	FB6E	2	422876942	FB6E_L	hDeltaC	20	20	31.35	20	22.4
all.1	FB6E	2	5813049824	FB6E_R	hDeltaC	20	20	33.65	20	25.55
all.1	FB6G	2	915964590	FB6G_L	hDeltaC	20	20	11.5	20	8.5
all.1	FB6G	2	329289084	FB6G_R	hDeltaC	20	20	10.2	20	8
all.1	FB6H	2	915960391	FB6H_L	hDeltaC	20	20	13.75	19	6.368
all.1	FB6H	2	5813020684	FB6H_R	hDeltaC	20	20	14.55	20	6.15
all.1	FB6H	2	915960391	FB6H_L	vDeltaC	28	27	6.185	28	11.643
all.1	FB6H	2	5813020684	FB6H_R	vDeltaC	28	28	6.571	28	14.179
all.1	FB6I	2	5813058367	FB6I_L	hDeltaC	20	18	4.667	19	3.526
all.1	FB6I	2	452029745	FB6I_R	hDeltaC	20	20	4.05	18	3.611
all.1	FB6N	2	860305498	FB6N_R	hDeltaC	20	20	3.55	18	2.278
all.1	FB6N	2	889414782	FB6N_L	vDeltaE	23	23	32.478	23	11.87
all.1	FB6N	2	860305498	FB6N_R	vDeltaE	23	23	36.826	23	15.304
all.1	FB6O	2	947663945	FB6O_L	vDeltaC	28	28	22.179	28	15.571
all.1	FB6O	2	978366493	FB6O_R	vDeltaC	28	28	16.643	28	15.286
all.1	FB6P	2	5813088939	FB6P_L	hDeltaC	20	20	21.5	20	12.1
all.1	FB6P	2	915605943	FB6P_R	hDeltaC	20	20	19.8	20	14.35
all.1	FB6Q	2	393215048	FB6Q_L	hDeltaC	20	20	9	19	3.053
all.1	FB7B	2	948346463	FB7B_L	vDeltaB	32	32	9.656	31	9.226
all.1	FB7B	2	5813020698	FB7B_R	vDeltaB	32	31	10.161	32	7.969
all.1	FB7H	2	915619188	FB7H_L	vDeltaB	32	31	11.548	32	14.688
all.1	FB7H	2	1009375310	FB7H_R	vDeltaB	32	31	14.935	32	16.906
all.1	FB7H	2	915619188	FB7H_L	vDeltaC	28	28	18.393	28	7.036
all.1	FB7H	2	1009375310	FB7H_R	vDeltaC	28	28	18.571	27	8.667
all.1	KCg-s2	1	5813032771	KCg-s2(super)_R	KCg-d	99	93	3.978	94	4.787
all.1	KCg-s3	1	1224137495	KCg-s3_R	KCg-d	99	94	3.202	90	3.433
all.1	LHAD1g1	1	792326206	LHAD1g1_R	LC4	71	68	4.956	66	6.576
all.1	LPsP	2	1095275456	LPsP(PB13)_L	Delta7	42	42	12.19	42	64.643
all.1	LPsP	2	881217171	LPsP(PB13)_R	Delta7	42	42	10.024	42	67.643
all.1	LPsP	2	1095275456	LPsP(PB13)_L	EPG	46	46	38.217	46	19.37
all.1	LPsP	2	881217171	LPsP(PB13)_R	EPG	46	46	33.674	46	20.152
all.1	MB-C1	2	5813021291	MB-C1_R	KCg-m	590	585	8.644	564	3.293
all.1	MB-C1	2	5813075020	MB-C1_R	KCg-m	590	589	8.703	566	3.378
all.1	OA-VPM3	2	329566174	OA-VPM3(NO2/NO3)_R	FC3	42	42	5.5	38	4.053
all.1	OA-VPM3	2	329566174	OA-VPM3(NO2/NO3)_R	PFR_a	29	29	11.655	29	7.207
all.1	OA-VPM3	2	5813061260	OA-VPM3(NO2/NO3)_L	PFR_a	29	29	9.552	28	5.571
all.1	PLP008	1	1282788953	PLP008_R	LC13	82	81	16.037	82	31.829
all.1	PLP081	2	974485542	PLP081_R	LLPC2a	59	55	4.4	59	11.288
all.1	PPL101	2	393766777	PPL101(y1pedc)_R	KCg-m	590	573	3.859	590	7.402
all.1	PPL101	2	1196854070	PPL101(y1pedc)(PDL05)_L	KCg-m	590	570	3.618	587	6.448
all.1	PPL103	2	1048172314	PPL103(y2a'1)(PDL05)_L	KCa'b'-ap1	91	91	7.396	91	12.187
all.1	PPL103	2	5813022424	PPL103(y2a'1)_R	KCa'b'-ap1	91	90	5.378	91	12
all.1	PPL103	2	1048172314	PPL103(y2a'1)(PDL05)_L	KCa'b'-ap2	127	127	6.512	127	7.362
all.1	PPL103	2	5813022424	PPL103(y2a'1)_R	KCa'b'-ap2	127	127	5.024	126	7.127
all.1	PPL103	2	1048172314	PPL103(y2a'1)(PDL05)_L	KCa'b'-m	119	119	6.37	119	6.689
all.1	PPL103	2	5813022424	PPL103(y2a'1)_R	KCa'b'-m	119	119	6.336	119	6.966
all.1	PPL103	2	1048172314	PPL103(y2a'1)(PDL05)_L	KCg-d	99	99	9.909	98	7.622
all.1	PPL103	2	5813022424	PPL103(y2a'1)_R	KCg-d	99	99	9.444	99	6.768
all.1	PPL103	2	1048172314	PPL103(y2a'1)(PDL05)_L	KCg-m	590	588	9.117	585	5.786
all.1	PPL103	2	5813022424	PPL103(y2a'1)_R	KCg-m	590	589	8.932	587	6.886
all.1	PPL104	2	517514142	PPL104(a'3)_R	KCa'b'-ap1	91	87	5.816	88	8.989
all.1	PPL104	2	517514142	PPL104(a'3)_R	KCa'b'-ap2	127	122	4.918	126	5.373
all.1	PPL105	2	5813019513	PPL105(a'2a2)_R	KCa'b'-ap2	127	126	4.651	125	5.76
all.1	PPL105	2	5813019513	PPL105(a'2a2)_R	KCa'b'-m	119	117	5.009	118	5.754
all.1	PPL105	2	642516892	PPL105(a'2a2)(PDL05)_L	KCa'b'-m	119	111	3.252	112	3.42
all.1	PPL105	2	5813019513	PPL105(a'2a2)_R	KCab-p	60	60	5.6	58	3.69
all.1	PPL105	2	642516892	PPL105(a'2a2)(PDL05)_L	KCab-p	60	60	7.3	59	5.237
all.1	PPL105	2	642516892	PPL105(a'2a2)(PDL05)_L	KCab-s	223	211	3.564	211	3.128
all.1	PPL106	2	5813019607	PPL106(a3)(PDL05)_L	KCab-c	252	241	3.154	247	4.174
all.1	PPL106	2	331662710	PPL106(a3)_R	KCab-c	252	244	3.357	250	4.588
all.1	PPL106	2	5813019607	PPL106(a3)(PDL05)_L	KCab-m	354	331	3.39	347	4.193
all.1	PPL106	2	331662710	PPL106(a3)_R	KCab-m	354	341	3.765	351	5.111
all.1	PPL106	2	331662710	PPL106(a3)_R	KCab-s	223	209	2.852	214	3.86
all.1	PVLP003	1	760306167	PVLP003_R	LC26	41	40	17.1	40	20.8
all.1	PVLP006	2	5813048443	PVLP006_R	LC6	61	59	3.966	59	5.983
all.1	PVLP011	1	5813039148	PVLP011_R	LC17	186	184	56.359	184	45.337
all.1	PVLP011	1	5813039148	PVLP011_R	LLPC1	44	44	7.455	43	25.07
all.1	PVLP011	1	5813039148	PVLP011_R	LPC1	113	113	10.549	113	22.159
all.1	PVLP011	1	5813039148	PVLP011_R	LPLC1	60	60	40.133	60	53.933
all.1	PVLP011	1	5813039148	PVLP011_R	LPLC2	85	85	71.247	85	73.529
all.1	PVLP024	2	1628291400	PVLP024_R	LC4	71	70	5.757	71	19.606
all.1	PVLP024	2	1753751888	PVLP024_R	LC4	71	71	4.845	71	19.014
all.1	PVLP025	2	1691972267	PVLP025_R	LC12	226	214	3.182	226	22.699
all.1	PVLP025	2	1663652072	PVLP025_R	LC12	226	218	3.656	226	22.226
all.1	PVLP044	2	1507782010	PVLP044_R	LC15	62	62	7.565	59	3.847
all.1	PVLP094	1	1503733177	PVLP094_R	LC11	70	63	2.921	68	3.5

## Sheet: Sheet1
ROI.thresh	Type	Number	Body ID	Instance name	Many type	Number	Downstream	Strength	Upstream	Strength
all.1	LPsP	2	1095275456	LPsP(PB13)_L	Delta7	42	42	12.19	42	64.643
all.1	LPsP	2	881217171	LPsP(PB13)_R	Delta7	42	42	10.024	42	67.643
all.1	ExR4	2	1730608428	ExR4(ring)_R	EPG	46	46	16.913	46	33.435
all.1	ExR4	2	1198330641	ExR4(ring)_L	EPG	46	46	15.957	46	12.283
all.1	ExR6	2	858587718	ExR6(ring)_R	EPG	46	46	66.478	46	92.63
all.1	ExR6	2	1228692168	ExR6(ring)_L	EPG	46	46	48.609	46	56.717
all.1	LPsP	2	1095275456	LPsP(PB13)_L	EPG	46	46	38.217	46	19.37
all.1	LPsP	2	881217171	LPsP(PB13)_R	EPG	46	46	33.674	46	20.152
all.1	ExR3	2	1036637638	ExR3(ring)_R	ER2_c	21	21	6.619	20	3.8
all.1	ExR3	2	919763043	ExR3(ring)_L	ER2_c	21	21	6	21	4
all.1	ExR3	2	1036637638	ExR3(ring)_R	ER4d	25	25	10.6	23	3
all.1	ExR3	2	919763043	ExR3(ring)_L	ER4d	25	25	9.56	25	4
all.1	ExR3	2	1036637638	ExR3(ring)_R	ER5	20	18	4.722	20	5.15
all.1	ExR3	2	919763043	ExR3(ring)_L	ER5	20	19	5.316	19	6.789
all.1	FB1H	2	519046655	FB1H(NO2/3)_L	FC2B	33	33	7.788	32	3.281
all.1	FB1H	2	5813062858	FB1H(NO2/3)_R	FC2B	33	33	7.364	31	3.355
all.1	OA-VPM3	2	329566174	OA-VPM3(NO2/NO3)_R	FC3	42	42	5.5	38	4.053
all.1	FB5F	2	705463539	FB5F_R	FS1A	44	42	5.786	41	3.463
all.1	FB5AB	2	5813047763	FB5AB_R	hDeltaC	20	20	29	19	4.211
all.1	FB5AB	2	946304488	FB5AB_L	hDeltaC	20	20	25.1	20	4.4
all.1	FB5I	2	423770604	FB5I_R	hDeltaC	20	20	47.55	20	42.25
all.1	FB5I	2	5813047616	FB5I_L	hDeltaC	20	20	46.8	20	40.6
all.1	FB5J	2	766863785	FB5J_R	hDeltaC	20	20	9.25	20	5.75
all.1	FB5J	2	1102514975	FB5J_L	hDeltaC	20	20	15.95	20	10.8
all.1	FB5N	2	5813058442	FB5N_L	hDeltaC	20	20	3.85	19	2.842
all.1	FB6D	2	946641212	FB6D_R	hDeltaC	20	20	24.05	18	2.889
all.1	FB6E	2	422876942	FB6E_L	hDeltaC	20	20	31.35	20	22.4
all.1	FB6E	2	5813049824	FB6E_R	hDeltaC	20	20	33.65	20	25.55
all.1	FB6G	2	915964590	FB6G_L	hDeltaC	20	20	11.5	20	8.5
all.1	FB6G	2	329289084	FB6G_R	hDeltaC	20	20	10.2	20	8
all.1	FB6H	2	915960391	FB6H_L	hDeltaC	20	20	13.75	19	6.368
all.1	FB6H	2	5813020684	FB6H_R	hDeltaC	20	20	14.55	20	6.15
all.1	FB6I	2	5813058367	FB6I_L	hDeltaC	20	18	4.667	19	3.526
all.1	FB6I	2	452029745	FB6I_R	hDeltaC	20	20	4.05	18	3.611
all.1	FB6N	2	860305498	FB6N_R	hDeltaC	20	20	3.55	18	2.278
all.1	FB6P	2	5813088939	FB6P_L	hDeltaC	20	20	21.5	20	12.1
all.1	FB6P	2	915605943	FB6P_R	hDeltaC	20	20	19.8	20	14.35
all.1	FB6Q	2	393215048	FB6Q_L	hDeltaC	20	20	9	19	3.053
all.1	FB1H	2	519046655	FB1H(NO2/3)_L	hDeltaJ	29	29	26.276	29	19.828
all.1	FB1H	2	5813062858	FB1H(NO2/3)_R	hDeltaJ	29	29	26.655	29	18.276
all.1	FB4X	2	5813041796	FB4X_L	hDeltaJ	29	29	18.897	29	38.103
all.1	FB4X	2	548907426	FB4X_R	hDeltaJ	29	29	21.69	29	38.483
all.1	FB5I	2	423770604	FB5I_R	hDeltaJ	29	27	7.519	29	23.31
all.1	FB5I	2	5813047616	FB5I_L	hDeltaJ	29	29	7.552	29	24.69
all.1	FB5J	2	766863785	FB5J_R	hDeltaJ	29	29	10.586	29	8.793
all.1	FB5J	2	1102514975	FB5J_L	hDeltaJ	29	29	9.448	29	8.655
all.1	ExR3	2	1036637638	ExR3(ring)_R	hDeltaK	31	31	49.839	31	38.645
all.1	ExR3	2	919763043	ExR3(ring)_L	hDeltaK	31	31	51.645	31	41.935
all.1	FB6D	2	946641212	FB6D_R	hDeltaK	31	31	9	31	31.161
all.1	FB6D	2	5813026514	FB6D_L	hDeltaK	31	31	7.323	31	26.323
all.1	APL	1	425790257	APL_R	KCa'b'-ap1	91	91	54.187	91	64.67
all.1	DPM	2	5813105172	DPM_R	KCa'b'-ap1	91	91	22.989	91	63.648
all.1	PPL103	2	1048172314	PPL103(y2a'1)(PDL05)_L	KCa'b'-ap1	91	91	7.396	91	12.187
all.1	PPL103	2	5813022424	PPL103(y2a'1)_R	KCa'b'-ap1	91	90	5.378	91	12
all.1	PPL104	2	517514142	PPL104(a'3)_R	KCa'b'-ap1	91	87	5.816	88	8.989
all.1	APL	1	425790257	APL_R	KCa'b'-ap2	127	127	60.685	127	53.299
all.1	DPM	2	5813105172	DPM_R	KCa'b'-ap2	127	127	27.417	127	57.646
all.1	PPL103	2	1048172314	PPL103(y2a'1)(PDL05)_L	KCa'b'-ap2	127	127	6.512	127	7.362
all.1	PPL103	2	5813022424	PPL103(y2a'1)_R	KCa'b'-ap2	127	127	5.024	126	7.127
all.1	PPL104	2	517514142	PPL104(a'3)_R	KCa'b'-ap2	127	122	4.918	126	5.373
all.1	PPL105	2	5813019513	PPL105(a'2a2)_R	KCa'b'-ap2	127	126	4.651	125	5.76
all.1	APL	1	425790257	APL_R	KCab-c	252	252	22.131	252	52.849
all.1	DPM	2	5813105172	DPM_R	KCab-c	252	252	8.024	252	14.167
all.1	PPL106	2	5813019607	PPL106(a3)(PDL05)_L	KCab-c	252	241	3.154	247	4.174
all.1	PPL106	2	331662710	PPL106(a3)_R	KCab-c	252	244	3.357	250	4.588
all.1	APL	1	425790257	APL_R	KCab-m	354	354	33.754	354	37.393
all.1	DPM	2	5813105172	DPM_R	KCab-m	354	354	13.037	354	26.836
all.1	PPL106	2	5813019607	PPL106(a3)(PDL05)_L	KCab-m	354	331	3.39	347	4.193
all.1	PPL106	2	331662710	PPL106(a3)_R	KCab-m	354	341	3.765	351	5.111
all.1	APL	1	425790257	APL_R	KCa'b'-m	119	119	60.462	119	59.765
all.1	DPM	2	5813105172	DPM_R	KCa'b'-m	119	119	30.42	119	61.866
all.1	PPL103	2	1048172314	PPL103(y2a'1)(PDL05)_L	KCa'b'-m	119	119	6.37	119	6.689
all.1	PPL103	2	5813022424	PPL103(y2a'1)_R	KCa'b'-m	119	119	6.336	119	6.966
all.1	PPL105	2	5813019513	PPL105(a'2a2)_R	KCa'b'-m	119	117	5.009	118	5.754
all.1	PPL105	2	642516892	PPL105(a'2a2)(PDL05)_L	KCa'b'-m	119	111	3.252	112	3.42
all.1	APL	1	425790257	APL_R	KCab-p	60	60	56.433	60	61.983
all.1	DPM	2	5813105172	DPM_R	KCab-p	60	60	18.1	60	37.983
all.1	PPL105	2	5813019513	PPL105(a'2a2)_R	KCab-p	60	60	5.6	58	3.69
all.1	PPL105	2	642516892	PPL105(a'2a2)(PDL05)_L	KCab-p	60	60	7.3	59	5.237
all.1	APL	1	425790257	APL_R	KCab-s	223	223	45.807	223	39.619
all.1	DPM	2	5813105172	DPM_R	KCab-s	223	223	13.686	223	30.318
all.1	PPL105	2	642516892	PPL105(a'2a2)(PDL05)_L	KCab-s	223	211	3.564	211	3.128
all.1	PPL106	2	331662710	PPL106(a3)_R	KCab-s	223	209	2.852	214	3.86
all.1	APL	1	425790257	APL_R	KCg-d	99	99	47.778	99	47.838
all.1	DPM	2	5813105172	DPM_R	KCg-d	99	99	13.778	99	33.859
all.1	KCg-s2	1	5813032771	KCg-s2(super)_R	KCg-d	99	93	3.978	94	4.787
all.1	KCg-s3	1	1224137495	KCg-s3_R	KCg-d	99	94	3.202	90	3.433
all.1	PPL103	2	1048172314	PPL103(y2a'1)(PDL05)_L	KCg-d	99	99	9.909	98	7.622
all.1	PPL103	2	5813022424	PPL103(y2a'1)_R	KCg-d	99	99	9.444	99	6.768
all.1	APL	1	425790257	APL_R	KCg-m	590	590	67.305	590	63.529
all.1	DPM	2	5813105172	DPM_R	KCg-m	590	590	16.376	590	33.927
all.1	MB-C1	2	5813021291	MB-C1_R	KCg-m	590	585	8.644	564	3.293
all.1	MB-C1	2	5813075020	MB-C1_R	KCg-m	590	589	8.703	566	3.378
all.1	PPL101	2	393766777	PPL101(y1pedc)_R	KCg-m	590	573	3.859	590	7.402
all.1	PPL101	2	1196854070	PPL101(y1pedc)(PDL05)_L	KCg-m	590	570	3.618	587	6.448
all.1	PPL103	2	1048172314	PPL103(y2a'1)(PDL05)_L	KCg-m	590	588	9.117	585	5.786
all.1	PPL103	2	5813022424	PPL103(y2a'1)_R	KCg-m	590	589	8.932	587	6.886
all.1	AVLP077	1	1136752885	AVLP077_R	LC11	70	64	3.672	69	8.058
all.1	AVLP079	1	950880008	AVLP079_R	LC11	70	70	12.986	70	13.829
all.1	AVLP086	1	1013982515	AVLP086_R	LC11	70	68	4.985	70	9.571
all.1	PVLP094	1	1503733177	PVLP094_R	LC11	70	63	2.921	68	3.5
all.1	PVLP025	2	1691972267	PVLP025_R	LC12	226	214	3.182	226	22.699
all.1	PVLP025	2	1663652072	PVLP025_R	LC12	226	218	3.656	226	22.226
all.1	PLP008	1	1282788953	PLP008_R	LC13	82	81	16.037	82	31.829
all.1	PVLP044	2	1507782010	PVLP044_R	LC15	62	62	7.565	59	3.847
all.1	PVLP011	1	5813039148	PVLP011_R	LC17	186	184	56.359	184	45.337
all.1	PVLP003	1	760306167	PVLP003_R	LC26	41	40	17.1	40	20.8
all.1	LHAD1g1	1	792326206	LHAD1g1_R	LC4	71	68	4.956	66	6.576
all.1	PVLP024	2	1628291400	PVLP024_R	LC4	71	70	5.757	71	19.606
all.1	PVLP024	2	1753751888	PVLP024_R	LC4	71	71	4.845	71	19.014
all.1	PVLP006	2	5813048443	PVLP006_R	LC6	61	59	3.966	59	5.983
all.1	PVLP011	1	5813039148	PVLP011_R	LLPC1	44	44	7.455	43	25.07
all.1	PLP081	2	974485542	PLP081_R	LLPC2a	59	55	4.4	59	11.288
all.1	PVLP011	1	5813039148	PVLP011_R	LPC1	113	113	10.549	113	22.159
all.1	PVLP011	1	5813039148	PVLP011_R	LPLC1	60	60	40.133	60	53.933
all.1	PVLP011	1	5813039148	PVLP011_R	LPLC2	85	85	71.247	85	73.529
all.1	APL	1	425790257	APL_R	PAM01_a	25	24	5.375	25	6.12
all.1	DPM	2	5813105172	DPM_R	PAM01_a	25	25	20.24	23	4.522
all.1	DPM	2	425276848	DPM_L	PAM01_a	25	25	21.4	24	4.708
all.1	APL	1	425790257	APL_R	PAM04_a	31	28	3.571	31	8.097
all.1	DPM	2	5813105172	DPM_R	PAM04_a	31	31	6.935	30	5.967
all.1	APL	1	425790257	APL_R	PAM06_a	24	24	4.292	24	8
all.1	DPM	2	5813105172	DPM_R	PAM06_a	24	24	8.125	24	8.292
all.1	DPM	2	425276848	DPM_L	PAM06_a	24	24	6.333	24	7.5
all.1	APL	1	425790257	APL_R	PAM12	23	22	3.682	22	7.682
all.1	DPM	2	5813105172	DPM_R	PAM12	23	22	16.955	21	7.286
all.1	DPM	2	425276848	DPM_L	PAM12	23	23	20.087	23	9.522
all.1	ExR4	2	1730608428	ExR4(ring)_R	PEN_a(PEN1)	20	20	40.7	20	9.55
all.1	ExR4	2	1198330641	ExR4(ring)_L	PEN_a(PEN1)	20	20	39	20	9.6
all.1	ExR6	2	858587718	ExR6(ring)_R	PEN_a(PEN1)	20	20	96.65	20	16.55
all.1	ExR6	2	1228692168	ExR6(ring)_L	PEN_a(PEN1)	20	20	94.45	20	17.9
all.1	FB3B	2	5813057963	FB3B(EB)_R	PEN_a(PEN1)	20	20	10.4	18	3.222
all.1	ExR4	2	1730608428	ExR4(ring)_R	PEN_b(PEN2)	22	22	76.545	22	7.318
all.1	ExR4	2	1198330641	ExR4(ring)_L	PEN_b(PEN2)	22	22	77.909	22	5.773
all.1	ExR6	2	858587718	ExR6(ring)_R	PEN_b(PEN2)	22	20	3.5	21	5.571
all.1	ExR6	2	1228692168	ExR6(ring)_L	PEN_b(PEN2)	22	20	3.5	22	6.182
all.1	FB1H	2	519046655	FB1H(NO2/3)_L	PFNd	40	40	8.8	39	4.154
all.1	FB1H	2	5813062858	FB1H(NO2/3)_R	PFNd	40	40	8.5	39	3.538
all.1	FB4B	2	1106857669	FB4B(NO2)_R	PFNd	40	40	5.575	40	5.1
all.1	FB4B	2	1101133698	FB4B(NO2)_L	PFNd	40	40	5.875	40	5.475
all.1	FB4C	2	1225290633	FB4C(NO2)_R	PFNd	40	40	38.3	40	9.675
all.1	FB4C	2	1131836229	FB4C(NO2)_L	PFNd	40	40	38.8	40	8.875
all.1	FB1H	2	519046655	FB1H(NO2/3)_L	PFNp_c	46	45	4.911	46	7.261
all.1	FB1H	2	5813062858	FB1H(NO2/3)_R	PFNp_c	46	45	4.489	46	5.5
all.1	FB1H	2	519046655	FB1H(NO2/3)_L	PFNp_e	21	20	3.8	21	7.857
all.1	FB1H	2	5813062858	FB1H(NO2/3)_R	PFNp_e	21	19	3.474	20	6.45
all.1	FB1H	2	519046655	FB1H(NO2/3)_L	PFNv	20	20	8.15	20	3.6
all.1	FB1H	2	5813062858	FB1H(NO2/3)_R	PFNv	20	20	11.55	20	4.5
all.1	FB4B	2	1101133698	FB4B(NO2)_L	PFNv	20	20	12.6	18	2.278
all.1	FB1H	2	519046655	FB1H(NO2/3)_L	PFR_a	29	29	9.414	29	7.69
all.1	FB1H	2	5813062858	FB1H(NO2/3)_R	PFR_a	29	29	9.448	29	6.241
all.1	FB4N	2	673746277	FB4N_R	PFR_a	29	27	3.667	27	3.963
all.1	FB4N	2	5813058422	FB4N_L	PFR_a	29	28	4.571	29	4.655
all.1	FB4Q_a	2	859977121	FB4Q_a_R	PFR_a	29	29	9.276	28	10.5
all.1	FB4Q_a	2	859714144	FB4Q_a_L	PFR_a	29	28	9.643	29	8.034
all.1	FB4X	2	5813041796	FB4X_L	PFR_a	29	29	8.655	29	19.241
all.1	FB4X	2	548907426	FB4X_R	PFR_a	29	29	8.621	29	19.828
all.1	FB5C	2	5812983636	FB5C_L	PFR_a	29	27	4.111	28	4.964
all.1	FB5D	2	5813076043	FB5D_L	PFR_a	29	28	4.607	29	4.379
all.1	FB5D	2	890671753	FB5D_R	PFR_a	29	27	6.074	27	6.519
all.1	FB5E	2	5813021247	FB5E_R	PFR_a	29	28	3.357	28	4.536
all.1	FB5E	2	798002859	FB5E_L	PFR_a	29	29	3.069	28	4.357
all.1	FB5I	2	423770604	FB5I_R	PFR_a	29	29	24.345	29	10.448
all.1	FB5I	2	5813047616	FB5I_L	PFR_a	29	29	25.724	29	11.345
all.1	OA-VPM3	2	329566174	OA-VPM3(NO2/NO3)_R	PFR_a	29	29	11.655	29	7.207
all.1	OA-VPM3	2	5813061260	OA-VPM3(NO2/NO3)_L	PFR_a	29	29	9.552	28	5.571
all.1	FB1I	2	916628962	FB1I_R	vDeltaA_b	31	30	6.267	30	6.3
all.1	FB1J	2	885598938	FB1J_R	vDeltaA_b	31	29	8.034	31	4.968
all.1	FB1J	2	885939922	FB1J_L	vDeltaA_b	31	30	10.7	30	4.3
all.1	FB1I	2	947664053	FB1I_L	vDeltaB	32	32	16.75	31	10.097
all.1	FB1I	2	916628962	FB1I_R	vDeltaB	32	32	16.094	32	8.656
all.1	FB7B	2	948346463	FB7B_L	vDeltaB	32	32	9.656	31	9.226
all.1	FB7B	2	5813020698	FB7B_R	vDeltaB	32	31	10.161	32	7.969
all.1	FB7H	2	915619188	FB7H_L	vDeltaB	32	31	11.548	32	14.688
all.1	FB7H	2	1009375310	FB7H_R	vDeltaB	32	31	14.935	32	16.906
all.1	FB6H	2	915960391	FB6H_L	vDeltaC	28	27	6.185	28	11.643
all.1	FB6H	2	5813020684	FB6H_R	vDeltaC	28	28	6.571	28	14.179
all.1	FB6O	2	947663945	FB6O_L	vDeltaC	28	28	22.179	28	15.571
all.1	FB6O	2	978366493	FB6O_R	vDeltaC	28	28	16.643	28	15.286
all.1	FB7H	2	915619188	FB7H_L	vDeltaC	28	28	18.393	28	7.036
all.1	FB7H	2	1009375310	FB7H_R	vDeltaC	28	28	18.571	27	8.667
all.1	FB5I	2	423770604	FB5I_R	vDeltaE	23	23	21.652	22	4.182
all.1	FB5I	2	5813047616	FB5I_L	vDeltaE	23	23	20.478	22	3.182
all.1	FB5L	2	977339122	FB5L_R	vDeltaE	23	23	32.304	23	21.261
all.1	FB5L	2	5813022949	FB5L_L	vDeltaE	23	23	33.609	23	22.304
all.1	FB6N	2	889414782	FB6N_L	vDeltaE	23	23	32.478	23	11.87
all.1	FB6N	2	860305498	FB6N_R	vDeltaE	23	23	36.826	23	15.304
all.1	FB5H	2	362715189	FB5H_R	vDeltaI	25	25	19.48	25	12.92
all.1	FB5H	2	486315287	FB5H_L	vDeltaI	25	25	18.84	25	12.76
all.1	FB5L	2	977339122	FB5L_R	vDeltaI	25	25	8.24	25	5.24
all.1	FB4H	2	953414780	FB4H_R	vDeltaK	46	46	31.696	46	9.913
all.1	FB4H	2	5813053846	FB4H_L	vDeltaK	46	46	32.326	46	10.413
all.1	FB4G	2	988567837	FB4G_R	vDeltaL	38	38	16.316	38	5.184
all.1	FB4G	2	5813061541	FB4G_L	vDeltaL	38	38	14.816	38	5.395
all.1	FB4H	2	953414780	FB4H_R	vDeltaL	38	38	13.184	38	7.868
all.1	FB4H	2	5813053846	FB4H_L	vDeltaL	38	38	13.105	38	9
all.1	FB4H	2	953414780	FB4H_R	vDeltaM	58	58	9.19	55	5.927
all.1	FB4H	2	5813053846	FB4H_L	vDeltaM	58	57	9.053	57	5.088
